# Supplementary material for: BI-3406, a Potent and Selective SOS1–KRAS Interaction Inhibitor, Is Effective in KRAS-Driven Cancers through Combined MEK Inhibition
Source: Oxford University Press journal article supplement (doi:10.1158/2159-8290.cd-20-0142), 2020-08-19
Supplement: cd-20-0142r1_supplementary_table_s2.xlsx [file cd-20-0142r1_supplementary_table_s2.xlsx]

## Sheet: Tabelle1
Kinase	Inhibition @ 10µM [%ctrl]
PLK4@IG	62
BMPR2@IG	59
LRRK2_FL	57
STK17B (DRAK2)@IG	41
LRRK2	38
PIK3CG	38
ULK1@IG	31
PRKCG	29
CAMK1_A	28
PRKCQ	26
CAMK2B	25
CLK4	23
MST4	22
PIK3CAPIK3R1	21
MKNK2 (MNK2)	20
KIT	18
PRKCE	18
ROS1	17
CDK2/CYCLINA	16
MAP4K5	16
PKN2@IG	16
ULK2@IG	16
EPHA6@IG	15
PRKCZ	15
CDK11 (INACTIVE)@IG	14
DAPK1	14
EPHA7	14
CDK7CYCLIN	13
FGFR1	13
FGR	13
INSRR	13
PRKCN	13
CDK3/CYCLIN E1@IG	12
DAPK2@IG	12
FLT3	12
RIPK2	12
SRC	12
STK25	12
STK32B (YANK2)@IG	12
BRAF V599E	11
CDK14 (PFTK1)/CYC@IG	11
ITK	11
LCK	11
MAP2K2	11
PRKCB2	11
STK24	11
STK33	11
ADRBK2	10
HIPK4	10
MAP3K5	10
MAP3K8	10
NTRK1	10
PASK	10
PIK3C3	10
PRKCH	10
RET	10
CDK5/P25	9
LYN A	9
MAP2K1	9
MARK4	9
PKN1	9
PLK2	9
SGK	9
TAOK1@IG	9
TGFBR2@IG	9
ABL2	8
CAMK2D	8
CHEK2	8
EPHA1	8
IGF1R	8
MAPK12	8
MET	8
MINK1	8
MUSK	8
PAK3	8
PRKACG (PRKAC GAM)@IG	8
PRKCI	8
PRKD1	8
CAMKK1	7
CDK16 (PCTK1)/CYC@IG	7
CLK2	7
CSNK2A1	7
DNA-PK	7
GSK3B	7
HCK	7
JAK3	7
LIMK1	7
MAP4K4	7
MAPK1	7
MAPKAPK2	7
PAK1	7
PHKG2	7
STK17A	7
ACVR1B	6
AXL	6
BTK	6
CDK9CYCLIN	6
CSNK2A2	6
EEF2K	6
FGFR3	6
FRK	6
ICK@IG	6
IRAK1	6
MARK1	6
MYLK2	6
PAK4	6
PDGFRA	6
ROCK1	6
STK22D	6
ALK	5
AMPK A2B1G1	5
BRAF	5
CASK@IG	5
CSNK1E	5
DMPK	5
EGFR	5
EPHA4	5
EPHB1	5
EPHB2	5
FGFR2	5
FLT4	5
GSK3A	5
IRAK4	5
LYN B	5
MAP3K10	5
MARK2	5
MYO3B (MYO3 BETA)@IG	5
NTRK3	5
PAK7	5
PRKCA	5
SIK1@IG	5
SNF1LK2	5
TNIK@IG	5
ACVRL1 (ALK1)@IG	4
AKT1	4
AURKC	4
CSK	4
CSNK1A1	4
DCAMKL2	4
EPHA2	4
FES	4
GRK7	4
MAP2K3	4
MAPK10	4
MAPK9	4
MAPKAPK3	4
MST1R	4
PIK3C2B	4
PRKX	4
PTK2	4
SLK	4
SRMS	4
SRPK1	4
STK38 (NDR)@IG	4
TEK	4
TXK	4
YES1	4
ADRBK1	3
AMPK A1B1G1	3
AURKB	3
CAMK2A	3
CAMKK2	3
CLK3	3
CSNK1G3	3
EPHA5	3
FYN	3
JAK1	3
MAP3K2	3
MAPK3	3
NTRK2	3
PDGFRB	3
PRKG1	3
RPS6KA4	3
SGKL	3
STK22B	3
STK6	3
SYK	3
TBK1	3
TNK2	3
TYRO3	3
ACVR1	2
BLK	2
CDK1/CYCLINB	2
CHEK1	2
CLK1	2
CSF1R	2
CSNK1D	2
DYRK4	2
ERBB2	2
FRAP1 (MTOR)	2
HIPK2	2
JAK2	2
MAP3K9	2
MAPK13	2
MLCK	2
NEK2	2
NEK4	2
PAK2	2
PLK1	2
PTK6	2
RPS6KA5	2
RPS6KA6	2
TLK1@IG	2
TYK2	2
ZAP70	2
ABL1	1
AKT2	1
AXL R499C@IG	1
CDK8_CYCLINC	1
DDR1	1
EPHB3	1
FGFR4	1
FLT1	1
FYN A@IG	1
MAPK8	1
PAK6	1
PIM1	1
PRKACA	1
PRKACB (PRKAC BET)@IG	1
PTK2B	1
RAF1	1
SRPK2	1
STK23	1
STK3	1
STK32C (YANK3)@IG	1
TAOK3	1
ACVR2B	0
DDR2	0
GRK6	0
IKBKB	0
INSR	0
LIMK2	0
MAP3K3	0
MERTK	0
NEK7	0
PRKD2	0
PRKG2	0
RPS6KA1	0
RPS6KB1	0
SGK2	0
SPHK2	0
ZAK	0
BRSK1	-1
CSNK1G2	-1
DYRK1A	-1
DYRK1B	-1
EPHA8	-1
EPHB4	-1
GRK4	-1
GRK5	-1
PHKG1	-1
PLK3	-1
RPS6KA2	-1
RPS6KA3	-1
BMX	-2
CAMK1D	-2
CAMK4	-2
ERBB4	-2
FER	-2
HIPK1	-2
LATS2@IG	-2
MAP3K11	-2
MAP3K14	-2
MAP3K7_K7IP1	-2
MATK	-2
MELK	-2
PDK1DIRECT	-2
STK4	-2
TLK2@IG	-2
WNK3@IG	-2
CHUK_IKKA	-3
CSNK1G1	-3
IKBKE	-3
LTK	-3
MARK3@CP	-3
NUAK2@IG	-3
PRKCB1	-3
PRKCD	-3
CAMK2G (CAMKII GA)@IG	-4
CDC7/DBF4@IG	-4
DAPK3	-4
KDR	-4
MAP4K2	-4
TAOK2	-4
TEC	-4
TGFBR1	-4
WEE1	-4
AKT3	-5
BMPR1B (ALK6)@IG	-5
DYRK3	-5
LATS1@IG	-5
MYLK	-5
NEK1	-5
PIK3C2A	-5
STK38L (NDR2)@IG	-5
ULK3@IG	-5
BRSK2@IG	-6
EIF2AK2@IG	-6
NLK	-6
PI4KB	-6
MAP4K3 (GLK)@IG	-7
SIK3@IG	-7
MAP2K6	-8
PIK3CDPIK3R1	-8
CDC42 BPB	-9
NEK9	-9
ROCK2	-9
GSG2	-10
STK16	-10
TESK2@IG	-10
CDC42 BPA	-11
SPHK1	-11
ACVR2A@IG	-12
BMPR1A(ALK3)	-12
NEK6	-12
PIM2	-12
WNK2	-12
NUAK1	-13
MAPK14P38A	-14
MAPK11	-15
TTK	-15
STK39 (STLK3)@IG	-16
PI4KA	-19
RIPK3@IG	-19
