# Supplementary material for: BI-3406, a Potent and Selective SOS1–KRAS Interaction Inhibitor, Is Effective in KRAS-Driven Cancers through Combined MEK Inhibition
Source: Oxford University Press journal article supplement (doi:10.1158/2159-8290.cd-20-0142), 2020-08-19
Supplement: cd-20-0142r1_supplementary_table_s4.xlsx [file cd-20-0142r1_supplementary_table_s4.xlsx]

## Sheet: Sheet1
celllinename	IC50	class	symbol	ensg	enst	dnamutation	dnazygosity	aamutation	exonscomplete
HCC-1438	6.5511	sensitive	BRAF	ENSG00000157764	ENST00000288602	wt	0	wt	0.94
NCI-H1435	10.31	sensitive	BRAF	ENSG00000157764	ENST00000288602	wt	0	wt	1
NCI-H1792	11.855	sensitive	BRAF	ENSG00000157764	ENST00000288602	wt	0	wt	0.94
NCI-H358	14.363	sensitive	BRAF	ENSG00000157764	ENST00000288602	wt	0	wt	0.94
SW837	15.935	sensitive	BRAF	ENSG00000157764	ENST00000288602	wt	0	wt	0.94
NCI-H23	15.963	sensitive	BRAF	ENSG00000157764	ENST00000288602	wt	0	wt	1
HCC-827	20.222	sensitive	BRAF	ENSG00000157764	ENST00000288602	wt	0	wt	1
SW620	22.236	sensitive	BRAF	ENSG00000157764	ENST00000288602	wt	0	wt	0.94
NCI-H2122	25.33	sensitive	BRAF	ENSG00000157764	ENST00000288602	wt	0	wt	0.94
MIA PaCa-2	25.438	sensitive	BRAF	ENSG00000157764	ENST00000288602	wt	0	wt	0.94
GEO	27.599	sensitive	BRAF	ENSG00000157764	ENST00000288602	wt	0	wt	1
A549	29	sensitive	BRAF	ENSG00000157764	ENST00000288602	wt	0	wt	0.94
ABC-1	35.74	sensitive	BRAF	ENSG00000157764	ENST00000288602	wt	0	wt	0.94
NCI-H1975	38.735	sensitive	BRAF	ENSG00000157764	ENST00000288602	wt	0	wt	1
DLD-1	39.118	sensitive	BRAF	ENSG00000157764	ENST00000288602	wt	0	wt	1
PC-9	60.09	sensitive	BRAF	ENSG00000157764	ENST00000288602	wt	0	wt	1
NCI-H1373	99.758	sensitive	BRAF	ENSG00000157764	ENST00000288602	wt	0	wt	0.94
NCI-H522	196	resistant	BRAF	ENSG00000157764	ENST00000288602	wt	0	wt	1
A-427	341	resistant	BRAF	ENSG00000157764	ENST00000288602	wt	0	wt	0.94
NCI-H292	2385	resistant	BRAF	ENSG00000157764	ENST00000288602	wt	0	wt	1
PA-1	2589	resistant	BRAF	ENSG00000157764	ENST00000288602	wt	0	wt	0.94
MEL-JUSO	3322	resistant	BRAF	ENSG00000157764	ENST00000288602	wt	0	wt	0.94
OUMS-23	5906.1	resistant	BRAF	ENSG00000157764	ENST00000288602	c.1799T>A;c.861-1G>A	0.18	p.Val600Glu	0.94
HT-29	7005	resistant	BRAF	ENSG00000157764	ENST00000288602	c.1799T>A;c.356C>G	0.79	p.Val600Glu;p.Thr119Ser	0.94
Calu-6	8533.2	resistant	BRAF	ENSG00000157764	ENST00000288602	wt	0	wt	0.94
A-375	10000	resistant	BRAF	ENSG00000157764	ENST00000288602	c.1799T>A	1	p.Val600Glu	1
COLO 205	10000	resistant	BRAF	ENSG00000157764	ENST00000288602	c.1799T>A	0.5	p.Val600Glu	0.94
HEC-151	10000	resistant	BRAF	ENSG00000157764	ENST00000288602	wt	0	wt	0.94
Hs 578T	10000	resistant	BRAF	ENSG00000157764	ENST00000288602	wt	0	wt	0.94
LS411N	10000	resistant	BRAF	ENSG00000157764	ENST00000288602	c.1799T>A	0.76	p.Val600Glu	0.94
NCI-H1299	10000	resistant	BRAF	ENSG00000157764	ENST00000288602	wt	0	wt	0.94
NCI-H1650	10000	resistant	BRAF	ENSG00000157764	ENST00000288602	wt	0	wt	0.94
NCI-H1993	10000	resistant	BRAF	ENSG00000157764	ENST00000288602	wt	0	wt	0.94
NCI-H2170	10000	resistant	BRAF	ENSG00000157764	ENST00000288602	wt	0	wt	1
NCI-H2347	10000	resistant	BRAF	ENSG00000157764	ENST00000288602	wt	0	wt	0.94
NCI-H460	10000	resistant	BRAF	ENSG00000157764	ENST00000288602	wt	0	wt	1
NCI-H520	10000	resistant	BRAF	ENSG00000157764	ENST00000288602	wt	0	wt	0.94
NCI-H82	10000	resistant	BRAF	ENSG00000157764	ENST00000288602	wt	0	wt	0.94
SW1417	10000	resistant	BRAF	ENSG00000157764	ENST00000288602	c.1799T>A	0.5	p.Val600Glu	0.94
SW48	10000	resistant	BRAF	ENSG00000157764	ENST00000288602	c.2128-5delT;c.1039C>T	0.65	p.Arg347Ter	0.94
HCC-1438	6.5511	sensitive	EGFR	ENSG00000146648	ENST00000275493	wt	0	wt	0.94
NCI-H1435	10.31	sensitive	EGFR	ENSG00000146648	ENST00000275493	wt	0	wt	0.94
NCI-H1792	11.855	sensitive	EGFR	ENSG00000146648	ENST00000275493	wt	0	wt	0.91
NCI-H358	14.363	sensitive	EGFR	ENSG00000146648	ENST00000275493	wt	0	wt	0.88
SW837	15.935	sensitive	EGFR	ENSG00000146648	ENST00000275493	wt	0	wt	0.94
NCI-H23	15.963	sensitive	EGFR	ENSG00000146648	ENST00000275493	wt	0	wt	0.94
HCC-827	20.222	sensitive	EGFR	ENSG00000146648	ENST00000275493	c.2236_2250delGAATTAAGAGAAGCA;c.2236G>A;c.2237A>C;c.2249C>A	0.97	p.Glu746_Ala750del;p.Glu746Lys;p.Glu746Ala;p.Ala750Glu	0.94
SW620	22.236	sensitive	EGFR	ENSG00000146648	ENST00000275493	wt	0	wt	0.91
NCI-H2122	25.33	sensitive	EGFR	ENSG00000146648	ENST00000275493	wt	0	wt	0.91
MIA PaCa-2	25.438	sensitive	EGFR	ENSG00000146648	ENST00000275493	wt	0	wt	0.88
GEO	27.599	sensitive	EGFR	ENSG00000146648	ENST00000275493	wt	0	wt	0.94
A549	29	sensitive	EGFR	ENSG00000146648	ENST00000275493	wt	0	wt	0.94
ABC-1	35.74	sensitive	EGFR	ENSG00000146648	ENST00000275493	wt	0	wt	0.91
NCI-H1975	38.735	sensitive	EGFR	ENSG00000146648	ENST00000275493	c.2369C>T;c.2573T>G	0.71	p.Thr790Met;p.Leu858Arg	0.94
DLD-1	39.118	sensitive	EGFR	ENSG00000146648	ENST00000275493	wt	0	wt	0.94
PC-9	60.09	sensitive	EGFR	ENSG00000146648	ENST00000275493	c.2235_2249delGGAATTAAGAGAAGC	0.76	p.Glu746_Ala750del	0.94
NCI-H1373	99.758	sensitive	EGFR	ENSG00000146648	ENST00000275493	wt	0	wt	0.91
NCI-H522	196	resistant	EGFR	ENSG00000146648	ENST00000275493	wt	0	wt	0.94
A-427	341	resistant	EGFR	ENSG00000146648	ENST00000275493	wt	0	wt	0.94
NCI-H292	2385	resistant	EGFR	ENSG00000146648	ENST00000275493	wt	0	wt	0.94
PA-1	2589	resistant	EGFR	ENSG00000146648	ENST00000275493	wt	0	wt	0.88
MEL-JUSO	3322	resistant	EGFR	ENSG00000146648	ENST00000275493	wt	0	wt	0.88
OUMS-23	5906.1	resistant	EGFR	ENSG00000146648	ENST00000275493	wt	0	wt	0.88
HT-29	7005	resistant	EGFR	ENSG00000146648	ENST00000275493	wt	0	wt	0.91
Calu-6	8533.2	resistant	EGFR	ENSG00000146648	ENST00000275493	wt	0	wt	0.88
A-375	10000	resistant	EGFR	ENSG00000146648	ENST00000275493	wt	0	wt	0.94
COLO 205	10000	resistant	EGFR	ENSG00000146648	ENST00000275493	wt	0	wt	0.84
HEC-151	10000	resistant	EGFR	ENSG00000146648	ENST00000275493	wt	0	wt	0.91
Hs 578T	10000	resistant	EGFR	ENSG00000146648	ENST00000275493	wt	0	wt	0.91
LS411N	10000	resistant	EGFR	ENSG00000146648	ENST00000275493	c.2818A>G;c.1456C>G;c.2200G>T	0.5	p.Thr940Ala;p.Gln486Glu;p.Glu734Ter	0.91
NCI-H1299	10000	resistant	EGFR	ENSG00000146648	ENST00000275493	wt	0	wt	0.88
NCI-H1650	10000	resistant	EGFR	ENSG00000146648	ENST00000275493	c.2235_2249delGGAATTAAGAGAAGC	0.5	p.Glu746_Ala750del	0.91
NCI-H1993	10000	resistant	EGFR	ENSG00000146648	ENST00000275493	wt	0	wt	0.91
NCI-H2170	10000	resistant	EGFR	ENSG00000146648	ENST00000275493	wt	0	wt	0.94
NCI-H2347	10000	resistant	EGFR	ENSG00000146648	ENST00000275493	wt	0	wt	0.91
NCI-H460	10000	resistant	EGFR	ENSG00000146648	ENST00000275493	wt	0	wt	0.94
NCI-H520	10000	resistant	EGFR	ENSG00000146648	ENST00000275493	wt	0	wt	0.94
NCI-H82	10000	resistant	EGFR	ENSG00000146648	ENST00000275493	wt	0	wt	0.91
SW1417	10000	resistant	EGFR	ENSG00000146648	ENST00000275493	wt	0	wt	0.91
SW48	10000	resistant	EGFR	ENSG00000146648	ENST00000275493	c.2155G>A;c.3046T>C	0.5	p.Gly719Ser;p.Tyr1016His	0.94
HCC-1438	6.5511	sensitive	HRAS	ENSG00000174775	ENST00000451590	wt	0	wt	1
NCI-H1435	10.31	sensitive	HRAS	ENSG00000174775	ENST00000451590	wt	0	wt	1
SW837	15.935	sensitive	HRAS	ENSG00000174775	ENST00000451590	wt	0	wt	1
NCI-H23	15.963	sensitive	HRAS	ENSG00000174775	ENST00000451590	wt	0	wt	1
HCC-827	20.222	sensitive	HRAS	ENSG00000174775	ENST00000451590	wt	0	wt	1
SW620	22.236	sensitive	HRAS	ENSG00000174775	ENST00000451590	wt	0	wt	1
NCI-H2122	25.33	sensitive	HRAS	ENSG00000174775	ENST00000451590	wt	0	wt	1
GEO	27.599	sensitive	HRAS	ENSG00000174775	ENST00000451590	wt	0	wt	1
A549	29	sensitive	HRAS	ENSG00000174775	ENST00000451590	wt	0	wt	1
ABC-1	35.74	sensitive	HRAS	ENSG00000174775	ENST00000451590	wt	0	wt	1
NCI-H1975	38.735	sensitive	HRAS	ENSG00000174775	ENST00000451590	wt	0	wt	1
DLD-1	39.118	sensitive	HRAS	ENSG00000174775	ENST00000451590	wt	0	wt	1
PC-9	60.09	sensitive	HRAS	ENSG00000174775	ENST00000451590	wt	0	wt	1
NCI-H1373	99.758	sensitive	HRAS	ENSG00000174775	ENST00000451590	wt	0	wt	1
NCI-H522	196	resistant	HRAS	ENSG00000174775	ENST00000451590	wt	0	wt	1
A-427	341	resistant	HRAS	ENSG00000174775	ENST00000451590	wt	0	wt	1
NCI-H292	2385	resistant	HRAS	ENSG00000174775	ENST00000451590	wt	0	wt	1
MEL-JUSO	3322	resistant	HRAS	ENSG00000174775	ENST00000451590	c.38G>A	1	p.Gly13Asp	0.31
OUMS-23	5906.1	resistant	HRAS	ENSG00000174775	ENST00000451590	wt	0	wt	1
HT-29	7005	resistant	HRAS	ENSG00000174775	ENST00000451590	wt	0	wt	1
A-375	10000	resistant	HRAS	ENSG00000174775	ENST00000451590	wt	0	wt	1
HEC-151	10000	resistant	HRAS	ENSG00000174775	ENST00000451590	wt	0	wt	1
Hs 578T	10000	resistant	HRAS	ENSG00000174775	ENST00000451590	c.35G>A	0.68	p.Gly12Asp	1
LS411N	10000	resistant	HRAS	ENSG00000174775	ENST00000451590	wt	0	wt	1
NCI-H2170	10000	resistant	HRAS	ENSG00000174775	ENST00000451590	wt	0	wt	1
NCI-H2347	10000	resistant	HRAS	ENSG00000174775	ENST00000451590	wt	0	wt	1
NCI-H460	10000	resistant	HRAS	ENSG00000174775	ENST00000451590	wt	0	wt	1
NCI-H520	10000	resistant	HRAS	ENSG00000174775	ENST00000451590	wt	0	wt	1
NCI-H82	10000	resistant	HRAS	ENSG00000174775	ENST00000451590	wt	0	wt	1
SW1417	10000	resistant	HRAS	ENSG00000174775	ENST00000451590	wt	0	wt	1
SW48	10000	resistant	HRAS	ENSG00000174775	ENST00000451590	wt	0	wt	1
HCC-1438	6.5511	sensitive	KRAS	ENSG00000133703	ENST00000256078	wt	0	wt	1
NCI-H1435	10.31	sensitive	KRAS	ENSG00000133703	ENST00000256078	wt	0	wt	1
NCI-H1792	11.855	sensitive	KRAS	ENSG00000133703	ENST00000256078	c.34G>T	0.5	p.Gly12Cys	1
NCI-H358	14.363	sensitive	KRAS	ENSG00000133703	ENST00000256078	c.34G>T	0.5	p.Gly12Cys	1
SW837	15.935	sensitive	KRAS	ENSG00000133703	ENST00000256078	c.34G>T	0.64	p.Gly12Cys	1
NCI-H23	15.963	sensitive	KRAS	ENSG00000133703	ENST00000256078	c.34G>T	0.69	p.Gly12Cys	1
HCC-827	20.222	sensitive	KRAS	ENSG00000133703	ENST00000256078	wt	0	wt	1
SW620	22.236	sensitive	KRAS	ENSG00000133703	ENST00000256078	c.35G>T	1	p.Gly12Val	1
NCI-H2122	25.33	sensitive	KRAS	ENSG00000133703	ENST00000256078	c.34G>T	1	p.Gly12Cys	1
MIA PaCa-2	25.438	sensitive	KRAS	ENSG00000133703	ENST00000256078	c.34G>T	1	p.Gly12Cys	1
GEO	27.599	sensitive	KRAS	ENSG00000133703	ENST00000256078	c.35G>C	1	p.Gly12Ala	1
A549	29	sensitive	KRAS	ENSG00000133703	ENST00000256078	c.34G>A	1	p.Gly12Ser	1
ABC-1	35.74	sensitive	KRAS	ENSG00000133703	ENST00000256078	wt	0	wt	1
NCI-H1975	38.735	sensitive	KRAS	ENSG00000133703	ENST00000256078	wt	0	wt	1
DLD-1	39.118	sensitive	KRAS	ENSG00000133703	ENST00000256078	c.38G>A	0.51	p.Gly13Asp	1
PC-9	60.09	sensitive	KRAS	ENSG00000133703	ENST00000256078	wt	0	wt	1
NCI-H1373	99.758	sensitive	KRAS	ENSG00000133703	ENST00000256078	c.34G>T	0.96	p.Gly12Cys	1
NCI-H522	196	resistant	KRAS	ENSG00000133703	ENST00000256078	wt	0	wt	1
A-427	341	resistant	KRAS	ENSG00000133703	ENST00000256078	c.35G>A	0.5	p.Gly12Asp	1
NCI-H292	2385	resistant	KRAS	ENSG00000133703	ENST00000256078	wt	0	wt	1
PA-1	2589	resistant	KRAS	ENSG00000133703	ENST00000256078	wt	0	wt	1
MEL-JUSO	3322	resistant	KRAS	ENSG00000133703	ENST00000256078	wt	0	wt	1
OUMS-23	5906.1	resistant	KRAS	ENSG00000133703	ENST00000256078	wt	0	wt	1
HT-29	7005	resistant	KRAS	ENSG00000133703	ENST00000256078	wt	0	wt	1
Calu-6	8533.2	resistant	KRAS	ENSG00000133703	ENST00000256078	c.181C>A	0.5	p.Gln61Lys	1
A-375	10000	resistant	KRAS	ENSG00000133703	ENST00000256078	wt	0	wt	1
COLO 205	10000	resistant	KRAS	ENSG00000133703	ENST00000256078	wt	0	wt	0.81
HEC-151	10000	resistant	KRAS	ENSG00000133703	ENST00000256078	wt	0	wt	1
Hs 578T	10000	resistant	KRAS	ENSG00000133703	ENST00000256078	wt	0	wt	1
LS411N	10000	resistant	KRAS	ENSG00000133703	ENST00000256078	wt	0	wt	1
NCI-H1299	10000	resistant	KRAS	ENSG00000133703	ENST00000256078	wt	0	wt	1
NCI-H1650	10000	resistant	KRAS	ENSG00000133703	ENST00000256078	wt	0	wt	1
NCI-H1993	10000	resistant	KRAS	ENSG00000133703	ENST00000256078	wt	0	wt	1
NCI-H2170	10000	resistant	KRAS	ENSG00000133703	ENST00000256078	wt	0	wt	1
NCI-H2347	10000	resistant	KRAS	ENSG00000133703	ENST00000256078	c.57G>T	0.5	p.Leu19Phe	1
NCI-H460	10000	resistant	KRAS	ENSG00000133703	ENST00000256078	c.183A>T	1	p.Gln61His	1
NCI-H520	10000	resistant	KRAS	ENSG00000133703	ENST00000256078	wt	0	wt	1
NCI-H82	10000	resistant	KRAS	ENSG00000133703	ENST00000256078	wt	0	wt	1
SW1417	10000	resistant	KRAS	ENSG00000133703	ENST00000256078	wt	0	wt	1
SW48	10000	resistant	KRAS	ENSG00000133703	ENST00000256078	wt	0	wt	1
HCC-1438	6.5511	sensitive	NF1	ENSG00000196712	ENST00000358273	c.6119C>T	0.96	p.Ser2040Phe	0.84
NCI-H1435	10.31	sensitive	NF1	ENSG00000196712	ENST00000358273	c.1845G>C;c.5035A>G	1	p.Lys615Asn;p.Ile1679Val	0.84
NCI-H1792	11.855	sensitive	NF1	ENSG00000196712	ENST00000358273	wt	0	wt	0.84
NCI-H358	14.363	sensitive	NF1	ENSG00000196712	ENST00000358273	wt	0	wt	0.84
SW837	15.935	sensitive	NF1	ENSG00000196712	ENST00000358273	wt	0	wt	0.84
NCI-H23	15.963	sensitive	NF1	ENSG00000196712	ENST00000358273	wt	0	wt	0.84
HCC-827	20.222	sensitive	NF1	ENSG00000196712	ENST00000358273	wt	0	wt	0.84
SW620	22.236	sensitive	NF1	ENSG00000196712	ENST00000358273	wt	0	wt	0.84
NCI-H2122	25.33	sensitive	NF1	ENSG00000196712	ENST00000358273	wt	0	wt	0.84
MIA PaCa-2	25.438	sensitive	NF1	ENSG00000196712	ENST00000358273	c.3160A>C	0.5	p.Asn1054His	0.83
A549	29	sensitive	NF1	ENSG00000196712	ENST00000358273	wt	0	wt	0.84
ABC-1	35.74	sensitive	NF1	ENSG00000196712	ENST00000358273	c.3127G>T	0.5	p.Glu1043Ter	0.84
NCI-H1975	38.735	sensitive	NF1	ENSG00000196712	ENST00000358273	c.4635C>A	0.04	p.Tyr1545Ter	0.84
DLD-1	39.118	sensitive	NF1	ENSG00000196712	ENST00000358273	c.7850C>T	0.5	p.Ala2617Val	0.85
NCI-H1373	99.758	sensitive	NF1	ENSG00000196712	ENST00000358273	c.5481C>G	0.7	p.Ile1827Met	0.84
NCI-H522	196	resistant	NF1	ENSG00000196712	ENST00000358273	wt	0	wt	0.84
A-427	341	resistant	NF1	ENSG00000196712	ENST00000358273	wt	0	wt	0.84
NCI-H292	2385	resistant	NF1	ENSG00000196712	ENST00000358273	wt	0	wt	0.85
PA-1	2589	resistant	NF1	ENSG00000196712	ENST00000358273	wt	0	wt	0.84
MEL-JUSO	3322	resistant	NF1	ENSG00000196712	ENST00000358273	c.5336T>C	0.5	p.Leu1779Pro	0.84
OUMS-23	5906.1	resistant	NF1	ENSG00000196712	ENST00000358273	wt	0	wt	0.84
HT-29	7005	resistant	NF1	ENSG00000196712	ENST00000358273	wt	0	wt	0.84
Calu-6	8533.2	resistant	NF1	ENSG00000196712	ENST00000358273	wt	0	wt	0.84
A-375	10000	resistant	NF1	ENSG00000196712	ENST00000358273	c.3870G>A	0.67	c.3870G>A(p.%3D)	0.84
COLO 205	10000	resistant	NF1	ENSG00000196712	ENST00000358273	wt	0	wt	0.84
HEC-151	10000	resistant	NF1	ENSG00000196712	ENST00000358273	c.7762C>T	0.45	p.Gln2588Ter	0.84
Hs 578T	10000	resistant	NF1	ENSG00000196712	ENST00000358273	c.8233G>A	0.5	p.Gly2745Arg	0.84
LS411N	10000	resistant	NF1	ENSG00000196712	ENST00000358273	c.8414C>T	0.16	p.Thr2805Ile	0.84
NCI-H1299	10000	resistant	NF1	ENSG00000196712	ENST00000358273	wt	0	wt	0.83
NCI-H1650	10000	resistant	NF1	ENSG00000196712	ENST00000358273	c.3114-7T>C	0	wt	0.84
NCI-H1993	10000	resistant	NF1	ENSG00000196712	ENST00000358273	wt	0	wt	0.83
NCI-H2170	10000	resistant	NF1	ENSG00000196712	ENST00000358273	wt	0	wt	0.84
NCI-H2347	10000	resistant	NF1	ENSG00000196712	ENST00000358273	c.92A>T	0.5	p.His31Leu	0.84
NCI-H460	10000	resistant	NF1	ENSG00000196712	ENST00000358273	wt	0	wt	0.85
NCI-H520	10000	resistant	NF1	ENSG00000196712	ENST00000358273	wt	0	wt	0.85
NCI-H82	10000	resistant	NF1	ENSG00000196712	ENST00000358273	c.993T>G	1	p.Ser331Arg	0.84
SW1417	10000	resistant	NF1	ENSG00000196712	ENST00000358273	wt	0	wt	0.84
SW48	10000	resistant	NF1	ENSG00000196712	ENST00000358273	wt	0	wt	0.84
HCC-1438	6.5511	sensitive	NRAS	ENSG00000213281	ENST00000369535	wt	0	wt	1
NCI-H1435	10.31	sensitive	NRAS	ENSG00000213281	ENST00000369535	wt	0	wt	1
NCI-H1792	11.855	sensitive	NRAS	ENSG00000213281	ENST00000369535	wt	0	wt	1
NCI-H358	14.363	sensitive	NRAS	ENSG00000213281	ENST00000369535	wt	0	wt	1
SW837	15.935	sensitive	NRAS	ENSG00000213281	ENST00000369535	wt	0	wt	1
NCI-H23	15.963	sensitive	NRAS	ENSG00000213281	ENST00000369535	wt	0	wt	1
HCC-827	20.222	sensitive	NRAS	ENSG00000213281	ENST00000369535	wt	0	wt	1
SW620	22.236	sensitive	NRAS	ENSG00000213281	ENST00000369535	wt	0	wt	1
NCI-H2122	25.33	sensitive	NRAS	ENSG00000213281	ENST00000369535	wt	0	wt	1
MIA PaCa-2	25.438	sensitive	NRAS	ENSG00000213281	ENST00000369535	wt	0	wt	1
GEO	27.599	sensitive	NRAS	ENSG00000213281	ENST00000369535	wt	0	wt	1
A549	29	sensitive	NRAS	ENSG00000213281	ENST00000369535	wt	0	wt	1
ABC-1	35.74	sensitive	NRAS	ENSG00000213281	ENST00000369535	wt	0	wt	1
NCI-H1975	38.735	sensitive	NRAS	ENSG00000213281	ENST00000369535	wt	0	wt	1
DLD-1	39.118	sensitive	NRAS	ENSG00000213281	ENST00000369535	wt	0	wt	1
PC-9	60.09	sensitive	NRAS	ENSG00000213281	ENST00000369535	wt	0	wt	1
NCI-H1373	99.758	sensitive	NRAS	ENSG00000213281	ENST00000369535	wt	0	wt	1
NCI-H522	196	resistant	NRAS	ENSG00000213281	ENST00000369535	wt	0	wt	1
A-427	341	resistant	NRAS	ENSG00000213281	ENST00000369535	wt	0	wt	1
NCI-H292	2385	resistant	NRAS	ENSG00000213281	ENST00000369535	wt	0	wt	1
PA-1	2589	resistant	NRAS	ENSG00000213281	ENST00000369535	c.35G>A	0.5	p.Gly12Asp	1
MEL-JUSO	3322	resistant	NRAS	ENSG00000213281	ENST00000369535	c.182A>T	0.5	p.Gln61Leu	1
OUMS-23	5906.1	resistant	NRAS	ENSG00000213281	ENST00000369535	wt	0	wt	1
HT-29	7005	resistant	NRAS	ENSG00000213281	ENST00000369535	wt	0	wt	1
Calu-6	8533.2	resistant	NRAS	ENSG00000213281	ENST00000369535	wt	0	wt	1
A-375	10000	resistant	NRAS	ENSG00000213281	ENST00000369535	wt	0	wt	1
COLO 205	10000	resistant	NRAS	ENSG00000213281	ENST00000369535	wt	0	wt	1
HEC-151	10000	resistant	NRAS	ENSG00000213281	ENST00000369535	c.35G>A	0.45	p.Gly12Asp	1
Hs 578T	10000	resistant	NRAS	ENSG00000213281	ENST00000369535	wt	0	wt	1
LS411N	10000	resistant	NRAS	ENSG00000213281	ENST00000369535	wt	0	wt	1
NCI-H1299	10000	resistant	NRAS	ENSG00000213281	ENST00000369535	c.181C>A	0.5	p.Gln61Lys	1
NCI-H1650	10000	resistant	NRAS	ENSG00000213281	ENST00000369535	wt	0	wt	1
NCI-H1993	10000	resistant	NRAS	ENSG00000213281	ENST00000369535	wt	0	wt	1
NCI-H2170	10000	resistant	NRAS	ENSG00000213281	ENST00000369535	wt	0	wt	1
NCI-H2347	10000	resistant	NRAS	ENSG00000213281	ENST00000369535	c.182A>G	1	p.Gln61Arg	1
NCI-H460	10000	resistant	NRAS	ENSG00000213281	ENST00000369535	wt	0	wt	1
NCI-H520	10000	resistant	NRAS	ENSG00000213281	ENST00000369535	wt	0	wt	1
NCI-H82	10000	resistant	NRAS	ENSG00000213281	ENST00000369535	wt	0	wt	1
SW1417	10000	resistant	NRAS	ENSG00000213281	ENST00000369535	wt	0	wt	1
SW48	10000	resistant	NRAS	ENSG00000213281	ENST00000369535	wt	0	wt	1
