# Supplementary material for: BI-3406, a Potent and Selective SOS1–KRAS Interaction Inhibitor, Is Effective in KRAS-Driven Cancers through Combined MEK Inhibition
Source: Oxford University Press journal article supplement (doi:10.1158/2159-8290.cd-20-0142), 2020-08-19
Supplement: cd-20-0142r1_supplementary_table_s5.xlsx [file cd-20-0142r1_supplementary_table_s5.xlsx]

## Sheet: Mutations
celllinename	IC50	class	KRAS	NRAS	HRAS	EGFR	NF1	BRAF
NCI-H1792	11.855	sensitive	p.Gly12Cys|heterozygot	wild-type	not available	wild-type	wild-type	wild-type
NCI-H358	14.363	sensitive	p.Gly12Cys|heterozygot	wild-type	not available	wild-type	wild-type	wild-type
SW837	15.935	sensitive	p.Gly12Cys|heterozygot	wild-type	wild-type	wild-type	wild-type	wild-type
NCI-H23	15.963	sensitive	p.Gly12Cys|heterozygot	wild-type	wild-type	wild-type	wild-type	wild-type
SW620	22.236	sensitive	p.Gly12Val|homozygot	wild-type	wild-type	wild-type	wild-type	wild-type
NCI-H2122	25.33	sensitive	p.Gly12Cys|homozygot	wild-type	wild-type	wild-type	wild-type	wild-type
A549	29	sensitive	p.Gly12Ser|homozygot	wild-type	wild-type	wild-type	wild-type	wild-type
GEO	27.599	sensitive	p.Gly12Ala|homozygot	wild-type	wild-type	wild-type	not available	wild-type
MIA PaCa-2	25.438	sensitive	p.Gly12Cys|homozygot	wild-type	not available	wild-type	p.Asn1054His|heterozygot	wild-type
DLD-1	39.118	sensitive	p.Gly13Asp|heterozygot	wild-type	wild-type	wild-type	p.Ala2617Val|heterozygot	wild-type
NCI-H1373	99.758	sensitive	p.Gly12Cys|homozygot	wild-type	wild-type	wild-type	p.Ile1827Met|heterozygot	wild-type
HCC-1438	6.5511	sensitive	wild-type	wild-type	wild-type	wild-type	p.Ser2040Phe|homozygot	wild-type
NCI-H1435	10.31	sensitive	wild-type	wild-type	wild-type	wild-type	p.Lys615Asn;p.Ile1679Val|homozygot	wild-type
ABC-1	35.74	sensitive	wild-type	wild-type	wild-type	wild-type	p.Glu1043Ter|heterozygot	wild-type
NCI-H1975	38.735	sensitive	wild-type	wild-type	wild-type	p.Thr790Met;p.Leu858Arg|heterozygot	p.Tyr1545Ter|homozygot	wild-type
HCC-827	20.222	sensitive	wild-type	wild-type	wild-type	p.Glu746_Ala750del;p.Glu746Lys;p.Glu746Ala;p.Ala750Glu|homozygot	wild-type	wild-type
PC-9	60.09	sensitive	wild-type	wild-type	wild-type	p.Glu746_Ala750del|heterozygot	not available	wild-type
OUMS-23	5906.1	resistant	wild-type	wild-type	wild-type	wild-type	wild-type	p.Val600Glu|heterozygot
HT-29	7005	resistant	wild-type	wild-type	wild-type	wild-type	wild-type	p.Val600Glu;p.Thr119Ser|heterozygot
COLO 205	10000	resistant	wild-type	wild-type	not available	wild-type	wild-type	p.Val600Glu|heterozygot
SW1417	10000	resistant	wild-type	wild-type	wild-type	wild-type	wild-type	p.Val600Glu|heterozygot
A-375	10000	resistant	wild-type	wild-type	wild-type	wild-type	c.3870G>A(p.%3D)|heterozygot	p.Val600Glu|homozygot
LS411N	10000	resistant	wild-type	wild-type	wild-type	p.Thr940Ala;p.Gln486Glu;p.Glu734Ter|heterozygot	p.Thr2805Ile|heterozygot	p.Val600Glu|heterozygot
Hs 578T	10000	resistant	wild-type	wild-type	p.Gly12Asp|heterozygot	wild-type	p.Gly2745Arg|heterozygot	wild-type
NCI-H82	10000	resistant	wild-type	wild-type	wild-type	wild-type	p.Ser331Arg|homozygot	wild-type
MEL-JUSO	3322	resistant	wild-type	p.Gln61Leu|heterozygot	p.Gly13Asp|homozygot	wild-type	p.Leu1779Pro|heterozygot	wild-type
HEC-151	10000	resistant	wild-type	p.Gly12Asp|heterozygot	wild-type	wild-type	p.Gln2588Ter|heterozygot	wild-type
NCI-H2347	10000	resistant	p.Leu19Phe|heterozygot	p.Gln61Arg|homozygot	wild-type	wild-type	p.His31Leu|heterozygot	wild-type
PA-1	2589	resistant	wild-type	p.Gly12Asp|heterozygot	not available	wild-type	wild-type	wild-type
NCI-H1299	10000	resistant	wild-type	p.Gln61Lys|heterozygot	not available	wild-type	wild-type	wild-type
NCI-H1650	10000	resistant	wild-type	wild-type	not available	p.Glu746_Ala750del|heterozygot	wild-type	wild-type
SW48	10000	resistant	wild-type	wild-type	wild-type	p.Gly719Ser;p.Tyr1016His|heterozygot	wild-type	p.Arg347Ter|heterozygot
A-427	341	resistant	p.Gly12Asp|heterozygot	wild-type	wild-type	wild-type	wild-type	wild-type
Calu-6	8533.2	resistant	p.Gln61Lys|heterozygot	wild-type	not available	wild-type	wild-type	wild-type
NCI-H460	10000	resistant	p.Gln61His|homozygot	wild-type	wild-type	wild-type	wild-type	wild-type
NCI-H522	196	resistant	wild-type	wild-type	wild-type	wild-type	wild-type	wild-type
NCI-H292	2385	resistant	wild-type	wild-type	wild-type	wild-type	wild-type	wild-type
NCI-H1993	10000	resistant	wild-type	wild-type	not available	wild-type	wild-type	wild-type
NCI-H2170	10000	resistant	wild-type	wild-type	wild-type	wild-type	wild-type	wild-type
NCI-H520	10000	resistant	wild-type	wild-type	wild-type	wild-type	wild-type	wild-type
