# Supplementary material for: BI-3406, a Potent and Selective SOS1–KRAS Interaction Inhibitor, Is Effective in KRAS-Driven Cancers through Combined MEK Inhibition
Source: Oxford University Press journal article supplement (doi:10.1158/2159-8290.cd-20-0142), 2020-08-19
Supplement: cd-20-0142r1_supplementary_table_s7.xlsx [file cd-20-0142r1_supplementary_table_s7.xlsx]

## Sheet: BI-3406_50mgkg_4h
ensg	symbol	name	logFC	AveExpr	t	P.Value	adj.P.Val	B
ENSG00000160888	IER2	immediate early response 2 [Source:HGNC Symbol;Acc:HGNC:28871]	-1.0419	9.02876	-6.53259	3.70261e-05	0.362803	-3.05658
ENSG00000139318	DUSP6	dual specificity phosphatase 6 [Source:HGNC Symbol;Acc:HGNC:3072]	-1.68491	3.82951	-6.29776	5.15747e-05	0.362803	-3.47758
ENSG00000281881	SPRY4-IT1	SPRY4 intronic transcript 1 [Source:HGNC Symbol;Acc:HGNC:42394]	-1.15354	4.84354	-5.76624	0.000112264	0.526479	-3.28053
ENSG00000114113	RBP2	retinol binding protein 2 [Source:HGNC Symbol;Acc:HGNC:9920]	2.77694	-1.62221	4.84912	0.000471575	0.99919	-4.41328
ENSG00000108984	MAP2K6	mitogen-activated protein kinase kinase 6 [Source:HGNC Symbol;Acc:HGNC:6846]	0.919888	2.17928	4.76606	0.00054018	0.99919	-3.86297
ENSG00000213719	CLIC1	chloride intracellular channel 1 [Source:HGNC Symbol;Acc:HGNC:2062]	-1.29233	5.05778	-4.72244	0.000580339	0.99919	-3.44003
ENSG00000185022	MAFF	MAF bZIP transcription factor F [Source:HGNC Symbol;Acc:HGNC:6780]	-0.895141	2.73143	-4.68706	0.000615215	0.99919	-3.85071
ENSG00000167550	RHEBL1	Ras homolog enriched in brain like 1 [Source:HGNC Symbol;Acc:HGNC:21166]	-0.871193	3.15449	-4.62866	0.000677675	0.99919	-3.76074
ENSG00000214391	TUBAP2	tubulin alpha pseudogene 2 [Source:HGNC Symbol;Acc:HGNC:14531]	1.51924	-0.281832	4.54073	0.000784564	0.99919	-4.31714
ENSG00000232176	NA	NA	0.829674	1.68538	4.4939	0.000848577	0.99919	-4.00634
ENSG00000270039	NA	NA	-1.23607	0.431082	-4.3658	0.00105316	0.99919	-4.32046
ENSG00000244405	ETV5	ETS variant 5 [Source:HGNC Symbol;Acc:HGNC:3494]	-0.861968	6.3945	-4.26007	0.00126068	0.99919	-3.4446
ENSG00000144136	SLC20A1	solute carrier family 20 member 1 [Source:HGNC Symbol;Acc:HGNC:10946]	-0.831093	8.46691	-4.16382	0.00148678	0.99919	-3.49112
ENSG00000187678	SPRY4	sprouty RTK signaling antagonist 4 [Source:HGNC Symbol;Acc:HGNC:15533]	-1.43591	2.43445	-4.15035	0.00152163	0.99919	-4.03527
ENSG00000157193	LRP8	LDL receptor related protein 8 [Source:HGNC Symbol;Acc:HGNC:6700]	-0.651367	5.90804	-4.11361	0.00162109	0.99919	-3.49775
ENSG00000116741	RGS2	regulator of G-protein signaling 2 [Source:HGNC Symbol;Acc:HGNC:9998]	1.07289	2.71929	4.10701	0.00163966	0.99919	-3.8486
ENSG00000089692	LAG3	lymphocyte activating 3 [Source:HGNC Symbol;Acc:HGNC:6476]	0.896627	1.45912	4.06914	0.0017506	0.99919	-4.09982
ENSG00000170542	SERPINB9	serpin family B member 9 [Source:HGNC Symbol;Acc:HGNC:8955]	-0.545582	5.1271	-4.06269	0.00177026	0.99919	-3.5599
ENSG00000154359	LONRF1	LON peptidase N-terminal domain and ring finger 1 [Source:HGNC Symbol;Acc:HGNC:26302]	-0.737299	2.22363	-4.02812	0.00187959	0.99919	-4.03385
ENSG00000178429	RPS3AP5	ribosomal protein S3A pseudogene 5 [Source:HGNC Symbol;Acc:HGNC:23744]	1.16583	-0.293348	3.97354	0.00206667	0.99919	-4.3553
ENSG00000174004	NRROS	negative regulator of reactive oxygen species [Source:HGNC Symbol;Acc:HGNC:24613]	-0.855959	3.15041	-3.9476	0.0021623	0.99919	-3.88437
ENSG00000126803	HSPA2	heat shock protein family A (Hsp70) member 2 [Source:HGNC Symbol;Acc:HGNC:5235]	0.823925	1.59797	3.93719	0.00220193	0.99919	-4.09045
ENSG00000146411	SLC2A12	solute carrier family 2 member 12 [Source:HGNC Symbol;Acc:HGNC:18067]	0.636274	4.49229	3.86684	0.00249031	0.99919	-3.64548
ENSG00000175592	FOSL1	FOS like 1, AP-1 transcription factor subunit [Source:HGNC Symbol;Acc:HGNC:13718]	-0.794479	4.80083	-3.81973	0.00270505	0.99919	-3.6672
ENSG00000071575	TRIB2	tribbles pseudokinase 2 [Source:HGNC Symbol;Acc:HGNC:30809]	-0.570917	8.59091	-3.78341	0.0028836	0.99919	-3.6054
ENSG00000159423	ALDH4A1	aldehyde dehydrogenase 4 family member A1 [Source:HGNC Symbol;Acc:HGNC:406]	-0.540528	6.75267	-3.74566	0.00308211	0.99919	-3.58768
ENSG00000164850	GPER1	G protein-coupled estrogen receptor 1 [Source:HGNC Symbol;Acc:HGNC:4485]	0.727265	3.76497	3.73941	0.00311633	0.99919	-3.76492
ENSG00000171223	JUNB	JunB proto-oncogene, AP-1 transcription factor subunit [Source:HGNC Symbol;Acc:HGNC:6205]	-0.994076	4.73945	-3.73442	0.00314388	0.99919	-3.70588
ENSG00000196890	HIST3H2BB	histone cluster 3, H2bb [Source:HGNC Symbol;Acc:HGNC:20514]	1.13804	-0.645899	3.7114	0.00327449	0.99919	-4.4028
ENSG00000087074	PPP1R15A	protein phosphatase 1 regulatory subunit 15A [Source:HGNC Symbol;Acc:HGNC:14375]	-0.493739	4.37455	-3.71057	0.00327927	0.99919	-3.7327
ENSG00000151012	SLC7A11	solute carrier family 7 member 11 [Source:HGNC Symbol;Acc:HGNC:11059]	1.20839	1.48117	3.69928	0.00334546	0.99919	-4.13704
ENSG00000101940	WDR13	WD repeat domain 13 [Source:HGNC Symbol;Acc:HGNC:14352]	0.528005	5.87905	3.67796	0.00347416	0.99919	-3.61687
ENSG00000120738	EGR1	early growth response 1 [Source:HGNC Symbol;Acc:HGNC:3238]	-1.06378	6.59253	-3.65686	0.00360658	0.99919	-3.6221
ENSG00000163661	PTX3	pentraxin 3 [Source:HGNC Symbol;Acc:HGNC:9692]	-0.712307	2.98665	-3.65102	0.00364415	0.99919	-3.95751
ENSG00000231735	NA	NA	0.874593	1.74648	3.63346	0.00375953	0.99919	-4.10707
ENSG00000260877	NA	NA	-0.86727	2.96218	-3.6326	0.00376523	0.99919	-3.97232
ENSG00000270504	NA	NA	0.811331	3.52142	3.63003	0.00378248	0.99919	-3.82449
ENSG00000143153	ATP1B1	ATPase Na+/K+ transporting subunit beta 1 [Source:HGNC Symbol;Acc:HGNC:804]	0.542232	4.32575	3.60316	0.00396753	0.99919	-3.73843
ENSG00000250072	NA	NA	-0.628864	7.28209	-3.59134	0.00405181	0.99919	-3.63972
ENSG00000137868	STRA6	stimulated by retinoic acid 6 [Source:HGNC Symbol;Acc:HGNC:30650]	-0.672688	4.34151	-3.57607	0.00416341	0.99919	-3.78089
ENSG00000141499	WRAP53	WD repeat containing antisense to TP53 [Source:HGNC Symbol;Acc:HGNC:25522]	-1.01709	3.9172	-3.53888	0.00444874	0.99919	-3.86061
ENSG00000239005	NA	Small nucleolar RNA ACA64 [Source:RFAM;Acc:RF01225]	1.66083	-1.55955	3.53683	0.00446507	0.99919	-4.46652
ENSG00000116285	ERRFI1	ERBB receptor feedback inhibitor 1 [Source:HGNC Symbol;Acc:HGNC:18185]	-0.532584	7.21666	-3.53552	0.00447551	0.99919	-3.65748
ENSG00000227195	MIR663AHG	MIR663A host gene [Source:HGNC Symbol;Acc:HGNC:27662]	1.25978	1.09892	3.53419	0.00448615	0.99919	-4.21982
ENSG00000159128	IFNGR2	interferon gamma receptor 2 (interferon gamma transducer 1) [Source:HGNC Symbol;Acc:HGNC:5440]	-0.504923	8.27841	-3.51673	0.00462809	0.99919	-3.68207
ENSG00000173214	MFSD4B	major facilitator superfamily domain containing 4B [Source:HGNC Symbol;Acc:HGNC:21053]	0.492607	5.19507	3.51344	0.00465536	0.99919	-3.69745
ENSG00000059804	SLC2A3	solute carrier family 2 member 3 [Source:HGNC Symbol;Acc:HGNC:11007]	-0.837098	6.0296	-3.4768	0.00497045	0.99919	-3.69107
ENSG00000137285	TUBB2B	tubulin beta 2B class IIb [Source:HGNC Symbol;Acc:HGNC:30829]	0.537714	5.60831	3.47659	0.0049723	0.99919	-3.69052
ENSG00000225756	DBH-AS1	DBH antisense RNA 1 [Source:HGNC Symbol;Acc:HGNC:24155]	-0.999424	0.683389	-3.47068	0.00502516	0.99919	-4.34686
ENSG00000179041	RRS1	ribosome biogenesis regulator homolog [Source:HGNC Symbol;Acc:HGNC:17083]	-0.632597	7.04426	-3.47018	0.00502965	0.99919	-3.67838
ENSG00000178999	AURKB	aurora kinase B [Source:HGNC Symbol;Acc:HGNC:11390]	-0.593972	9.23152	-3.46878	0.00504225	0.99919	-3.71984
ENSG00000099625	CBARP	CACN beta subunit associated regulatory protein [Source:HGNC Symbol;Acc:HGNC:28617]	-1.06274	1.38869	-3.46868	0.00504316	0.99919	-4.26446
ENSG00000047457	CP	ceruloplasmin [Source:HGNC Symbol;Acc:HGNC:2295]	1.1639	0.783569	3.42108	0.0054919	0.99919	-4.27506
ENSG00000182359	KBTBD3	kelch repeat and BTB domain containing 3 [Source:HGNC Symbol;Acc:HGNC:22934]	0.790495	1.32297	3.40808	0.00562141	0.99919	-4.20923
ENSG00000160446	ZDHHC12	zinc finger DHHC-type containing 12 [Source:HGNC Symbol;Acc:HGNC:19159]	0.649091	3.97099	3.36961	0.00602316	0.99919	-3.84249
ENSG00000183111	ARHGEF37	Rho guanine nucleotide exchange factor 37 [Source:HGNC Symbol;Acc:HGNC:34430]	0.503433	2.84745	3.36916	0.00602802	0.99919	-3.99184
ENSG00000176723	ZNF843	zinc finger protein 843 [Source:HGNC Symbol;Acc:HGNC:28710]	1.05532	0.074209	3.36636	0.0060584	0.99919	-4.36267
ENSG00000179841	AKAP5	A-kinase anchoring protein 5 [Source:HGNC Symbol;Acc:HGNC:375]	1.06534	-0.0527093	3.36636	0.00605848	0.99919	-4.37638
ENSG00000235385	NA	NA	0.712751	5.13691	3.36281	0.00609724	0.99919	-3.74875
ENSG00000153885	KCTD15	potassium channel tetramerization domain containing 15 [Source:HGNC Symbol;Acc:HGNC:23297]	-0.425139	4.1367	-3.36222	0.0061037	0.99919	-3.85497
ENSG00000156113	KCNMA1	potassium calcium-activated channel subfamily M alpha 1 [Source:HGNC Symbol;Acc:HGNC:6284]	0.478468	5.28246	3.35876	0.00614171	0.99919	-3.74397
ENSG00000127528	KLF2	Kruppel like factor 2 [Source:HGNC Symbol;Acc:HGNC:6347]	-0.915135	3.25286	-3.34822	0.00625907	0.99919	-3.99571
ENSG00000147854	UHRF2	ubiquitin like with PHD and ring finger domains 2 [Source:HGNC Symbol;Acc:HGNC:12557]	-0.388491	6.69923	-3.3202	0.00658249	0.99919	-3.72926
ENSG00000141699	FAM134C	family with sequence similarity 134 member C [Source:HGNC Symbol;Acc:HGNC:27258]	-0.78721	6.66295	-3.31418	0.00665422	0.99919	-3.73396
ENSG00000166592	RRAD	RRAD, Ras related glycolysis inhibitor and calcium channel regulator [Source:HGNC Symbol;Acc:HGNC:10446]	1.31681	4.70862	3.29501	0.00688782	0.99919	-3.79602
ENSG00000147872	PLIN2	perilipin 2 [Source:HGNC Symbol;Acc:HGNC:248]	0.544332	6.97693	3.26805	0.00723044	0.99919	-3.74979
ENSG00000107554	DNMBP	dynamin binding protein [Source:HGNC Symbol;Acc:HGNC:30373]	-0.413818	6.19816	-3.26693	0.00724501	0.99919	-3.75338
ENSG00000231887	PRH1	proline rich protein HaeIII subfamily 1 [Source:HGNC Symbol;Acc:HGNC:9366]	1.61324	-1.31754	3.26472	0.00727388	0.99919	-4.46717
ENSG00000131981	LGALS3	galectin 3 [Source:HGNC Symbol;Acc:HGNC:6563]	0.496873	6.56157	3.25181	0.0074452	0.99919	-3.75311
ENSG00000120925	RNF170	ring finger protein 170 [Source:HGNC Symbol;Acc:HGNC:25358]	0.406453	4.99169	3.23672	0.00765043	0.99919	-3.80157
ENSG00000150637	CD226	CD226 molecule [Source:HGNC Symbol;Acc:HGNC:16961]	-0.620278	1.99569	-3.236	0.00766037	0.99919	-4.18795
ENSG00000116667	C1orf21	chromosome 1 open reading frame 21 [Source:HGNC Symbol;Acc:HGNC:15494]	1.06877	-0.18077	3.2286	0.00776335	0.99919	-4.39982
ENSG00000077238	IL4R	interleukin 4 receptor [Source:HGNC Symbol;Acc:HGNC:6015]	-0.627113	4.6394	-3.22622	0.00779665	0.99919	-3.85325
ENSG00000221994	ZNF630	zinc finger protein 630 [Source:HGNC Symbol;Acc:HGNC:28855]	0.959748	-0.526036	3.22367	0.00783269	0.99919	-4.42592
ENSG00000114200	BCHE	butyrylcholinesterase [Source:HGNC Symbol;Acc:HGNC:983]	0.89445	1.72017	3.20807	0.00805622	0.99919	-4.18003
ENSG00000115073	ACTR1B	ARP1 actin-related protein 1 homolog B, centractin beta [Source:HGNC Symbol;Acc:HGNC:168]	0.451792	6.60463	3.20789	0.00805883	0.99919	-3.76882
ENSG00000198840	MT-ND3	mitochondrially encoded NADH:ubiquinone oxidoreductase core subunit 3 [Source:HGNC Symbol;Acc:HGNC:7458]	-0.445552	11.8461	-3.20523	0.00809761	0.99919	-3.86344
ENSG00000185262	UBALD2	UBA like domain containing 2 [Source:HGNC Symbol;Acc:HGNC:28438]	-0.517931	6.45519	-3.18858	0.00834461	0.99919	-3.77855
ENSG00000196668	LINC00173	long intergenic non-protein coding RNA 173 [Source:HGNC Symbol;Acc:HGNC:33791]	0.518113	3.76156	3.18111	0.00845796	0.99919	-3.92251
ENSG00000166886	NAB2	NGFI-A binding protein 2 [Source:HGNC Symbol;Acc:HGNC:7627]	-0.745651	4.12947	-3.16412	0.00872149	0.99919	-3.92667
ENSG00000128342	LIF	leukemia inhibitory factor [Source:HGNC Symbol;Acc:HGNC:6596]	-0.939646	2.39758	-3.15982	0.00878951	0.99919	-4.15944
ENSG00000170075	GPR37L1	G protein-coupled receptor 37 like 1 [Source:HGNC Symbol;Acc:HGNC:14923]	1.13637	0.547984	3.15682	0.00883729	0.99919	-4.33361
ENSG00000147044	CASK	calcium/calmodulin dependent serine protein kinase [Source:HGNC Symbol;Acc:HGNC:1497]	0.415582	4.27706	3.14419	0.00904111	0.99919	-3.88508
ENSG00000244486	SCARF2	scavenger receptor class F member 2 [Source:HGNC Symbol;Acc:HGNC:19869]	1.92971	-1.25068	3.13407	0.00920801	0.99919	-4.46767
ENSG00000169242	EFNA1	ephrin A1 [Source:HGNC Symbol;Acc:HGNC:3221]	0.55417	5.09501	3.12978	0.00927979	0.99919	-3.83159
ENSG00000237489	LINC00959	long intergenic non-protein coding RNA 959 [Source:HGNC Symbol;Acc:HGNC:48677]	0.862891	0.72465	3.12948	0.00928475	0.99919	-4.32053
ENSG00000237352	LINC01358	long intergenic non-protein coding RNA 1358 [Source:HGNC Symbol;Acc:HGNC:50589]	1.19485	1.31608	3.12499	0.00936044	0.99919	-4.24549
ENSG00000073150	PANX2	pannexin 2 [Source:HGNC Symbol;Acc:HGNC:8600]	0.700236	3.49216	3.11475	0.00953524	0.99919	-3.9682
ENSG00000131196	NFATC1	nuclear factor of activated T-cells 1 [Source:HGNC Symbol;Acc:HGNC:7775]	-0.356566	4.90497	-3.10091	0.00977687	0.99919	-3.86572
ENSG00000206077	ZDHHC11B	zinc finger DHHC-type containing 11B [Source:HGNC Symbol;Acc:HGNC:32962]	0.954219	1.15495	3.10069	0.00978084	0.99919	-4.2721
ENSG00000188483	IER5L	immediate early response 5 like [Source:HGNC Symbol;Acc:HGNC:23679]	-0.805175	6.12813	-3.0885	0.00999881	0.99919	-3.8234
ENSG00000225416	NA	NA	1.58169	-0.788544	3.06782	0.01038	0.99919	-4.448
ENSG00000182118	FAM89A	family with sequence similarity 89 member A [Source:HGNC Symbol;Acc:HGNC:25057]	-0.888818	0.651053	-3.06584	0.0104172	0.99919	-4.37748
ENSG00000161204	ABCF3	ATP binding cassette subfamily F member 3 [Source:HGNC Symbol;Acc:HGNC:72]	-0.834533	3.82875	-3.064	0.010452	0.99919	-3.98917
ENSG00000006327	TNFRSF12A	TNF receptor superfamily member 12A [Source:HGNC Symbol;Acc:HGNC:18152]	-1.02166	4.88038	-3.05369	0.0106487	0.99919	-3.90133
ENSG00000244331	NA	NA	1.1119	-0.613902	3.03693	0.0109767	0.99919	-4.44353
ENSG00000274341	NA	NA	0.987201	-0.203508	3.03508	0.0110136	0.99919	-4.41635
ENSG00000185338	SOCS1	suppressor of cytokine signaling 1 [Source:HGNC Symbol;Acc:HGNC:19383]	-0.943897	1.27287	-3.03147	0.0110857	0.99919	-4.32383
ENSG00000186767	SPIN4	spindlin family member 4 [Source:HGNC Symbol;Acc:HGNC:27040]	-0.378087	5.78089	-3.02811	0.0111533	0.99919	-3.85
ENSG00000133134	BEX2	brain expressed X-linked 2 [Source:HGNC Symbol;Acc:HGNC:30933]	1.5017	-0.507563	3.01829	0.0113534	0.99919	-4.43443
ENSG00000115041	KCNIP3	potassium voltage-gated channel interacting protein 3 [Source:HGNC Symbol;Acc:HGNC:15523]	0.747158	2.0526	3.01779	0.0113637	0.99919	-4.17341
ENSG00000136114	THSD1	thrombospondin type 1 domain containing 1 [Source:HGNC Symbol;Acc:HGNC:17754]	-0.657256	5.02245	-3.01632	0.011394	0.99919	-3.89394
ENSG00000149823	VPS51	VPS51, GARP complex subunit [Source:HGNC Symbol;Acc:HGNC:1172]	0.566753	4.77861	3.01541	0.0114128	0.99919	-3.88915
ENSG00000149115	TNKS1BP1	tankyrase 1 binding protein 1 [Source:HGNC Symbol;Acc:HGNC:19081]	0.532795	3.59786	3.01464	0.0114287	0.99919	-3.98899
ENSG00000112561	TFEB	transcription factor EB [Source:HGNC Symbol;Acc:HGNC:11753]	-0.752282	1.50206	-3.00974	0.0115305	0.99919	-4.29201
ENSG00000196453	ZNF777	zinc finger protein 777 [Source:HGNC Symbol;Acc:HGNC:22213]	-0.408703	4.87595	-3.00646	0.0115993	0.99919	-3.90139
ENSG00000110455	ACCS	1-aminocyclopropane-1-carboxylate synthase homolog (inactive) [Source:HGNC Symbol;Acc:HGNC:23989]	0.435038	3.77854	2.9984	0.0117697	0.99919	-3.97746
ENSG00000006468	ETV1	ETS variant 1 [Source:HGNC Symbol;Acc:HGNC:3490]	-0.691203	3.96793	-2.99518	0.0118386	0.99919	-3.99138
ENSG00000250222	NA	NA	0.483827	3.93436	2.99396	0.0118647	0.99919	-3.96302
ENSG00000197971	MBP	myelin basic protein [Source:HGNC Symbol;Acc:HGNC:6925]	-0.356132	7.63686	-2.98596	0.0120379	0.99919	-3.85804
ENSG00000166473	PKD1L2	polycystin 1 like 2 (gene/pseudogene) [Source:HGNC Symbol;Acc:HGNC:21715]	0.937869	1.57556	2.98149	0.0121355	0.99919	-4.23888
ENSG00000163435	ELF3	E74 like ETS transcription factor 3 [Source:HGNC Symbol;Acc:HGNC:3318]	0.360514	6.30243	2.97942	0.0121813	0.99919	-3.85458
ENSG00000233085	NA	NA	-0.404922	7.21415	-2.97117	0.0123645	0.99919	-3.85885
ENSG00000162231	NXF1	nuclear RNA export factor 1 [Source:HGNC Symbol;Acc:HGNC:8071]	-0.364171	4.84082	-2.96844	0.0124259	0.99919	-3.91595
ENSG00000251322	SHANK3	SH3 and multiple ankyrin repeat domains 3 [Source:HGNC Symbol;Acc:HGNC:14294]	-0.91728	0.0844765	-2.96079	0.0125991	0.99919	-4.43703
ENSG00000104783	KCNN4	potassium calcium-activated channel subfamily N member 4 [Source:HGNC Symbol;Acc:HGNC:6293]	-0.451472	8.62919	-2.96031	0.0126102	0.99919	-3.88346
ENSG00000246922	UBAP1L	ubiquitin associated protein 1 like [Source:HGNC Symbol;Acc:HGNC:40028]	0.739839	0.907957	2.95791	0.0126651	0.99919	-4.32524
ENSG00000108511	HOXB6	homeobox B6 [Source:HGNC Symbol;Acc:HGNC:5117]	-0.352369	4.70965	-2.95406	0.0127536	0.99919	-3.92942
ENSG00000008853	RHOBTB2	Rho related BTB domain containing 2 [Source:HGNC Symbol;Acc:HGNC:18756]	-0.418901	5.01916	-2.951	0.0128246	0.99919	-3.91168
ENSG00000149212	SESN3	sestrin 3 [Source:HGNC Symbol;Acc:HGNC:23060]	0.888323	-0.172697	2.94572	0.0129477	0.99919	-4.42185
ENSG00000224596	ZMIZ1-AS1	ZMIZ1 antisense RNA 1 [Source:HGNC Symbol;Acc:HGNC:27433]	0.94946	-0.284627	2.94542	0.0129548	0.99919	-4.42919
ENSG00000203993	ARRDC1-AS1	ARRDC1 antisense RNA 1 [Source:HGNC Symbol;Acc:HGNC:23395]	0.69521	1.03194	2.94508	0.0129628	0.99919	-4.31371
ENSG00000158161	EYA3	EYA transcriptional coactivator and phosphatase 3 [Source:HGNC Symbol;Acc:HGNC:3521]	-0.463113	5.66879	-2.93487	0.0132048	0.99919	-3.88917
ENSG00000173511	VEGFB	vascular endothelial growth factor B [Source:HGNC Symbol;Acc:HGNC:12681]	0.481699	4.43181	2.92687	0.0133976	0.99919	-3.94363
ENSG00000274859	NA	NA	0.878884	-0.00451573	2.92112	0.0135377	0.99919	-4.41053
ENSG00000200685	NA	Y RNA [Source:RFAM;Acc:RF00019]	1.2408	-1.08022	2.92015	0.0135616	0.99919	-4.47442
ENSG00000239282	GATSL3	GATS protein like 3 [Source:HGNC Symbol;Acc:HGNC:34423]	-1.0471	1.50081	-2.91886	0.0135932	0.99919	-4.3197
ENSG00000226472	NA	NA	1.13939	-0.71767	2.90445	0.0139527	0.99919	-4.45786
ENSG00000155287	SLC25A28	solute carrier family 25 member 28 [Source:HGNC Symbol;Acc:HGNC:23472]	-0.454927	4.18012	-2.90038	0.0140559	0.99919	-3.99238
ENSG00000173546	CSPG4	chondroitin sulfate proteoglycan 4 [Source:HGNC Symbol;Acc:HGNC:2466]	0.714837	2.50546	2.89996	0.0140666	0.99919	-4.14223
ENSG00000242477	NA	NA	1.24808	-0.610178	2.89363	0.0142289	0.99919	-4.45204
ENSG00000225969	ABHD11-AS1	ABHD11 antisense RNA 1 (tail to tail) [Source:HGNC Symbol;Acc:HGNC:18289]	0.832524	0.804717	2.88964	0.0143319	0.99919	-4.3426
ENSG00000143367	TUFT1	tuftelin 1 [Source:HGNC Symbol;Acc:HGNC:12422]	0.624345	5.66906	2.88884	0.0143529	0.99919	-3.89852
ENSG00000168411	RFWD3	ring finger and WD repeat domain 3 [Source:HGNC Symbol;Acc:HGNC:25539]	-0.56436	7.31028	-2.88303	0.0145046	0.99919	-3.89326
ENSG00000214870	NA	NA	1.27362	-1.39363	2.88286	0.0145092	0.99919	-4.49183
ENSG00000196357	ZNF565	zinc finger protein 565 [Source:HGNC Symbol;Acc:HGNC:26726]	0.750928	1.33584	2.88028	0.014577	0.99919	-4.28649
ENSG00000226711	FAM66C	family with sequence similarity 66 member C [Source:HGNC Symbol;Acc:HGNC:21644]	0.562107	1.77168	2.87701	0.0146638	0.99919	-4.23992
ENSG00000171298	GAA	glucosidase alpha, acid [Source:HGNC Symbol;Acc:HGNC:4065]	0.515735	6.53082	2.87087	0.0148276	0.99919	-3.89536
ENSG00000171621	SPSB1	splA/ryanodine receptor domain and SOCS box containing 1 [Source:HGNC Symbol;Acc:HGNC:30628]	-0.418721	5.7481	-2.868	0.0149049	0.99919	-3.9111
ENSG00000131400	NAPSA	napsin A aspartic peptidase [Source:HGNC Symbol;Acc:HGNC:13395]	1.00492	-0.522115	2.86404	0.0150121	0.99919	-4.451
ENSG00000224165	DNAJC27-AS1	DNAJC27 antisense RNA 1 [Source:HGNC Symbol;Acc:HGNC:42943]	0.652269	2.07383	2.85769	0.0151859	0.99919	-4.20474
ENSG00000257167	TMPO-AS1	TMPO antisense RNA 1 [Source:HGNC Symbol;Acc:HGNC:44158]	0.442913	2.66403	2.8573	0.0151967	0.99919	-4.13952
ENSG00000132323	ILKAP	ILK associated serine/threonine phosphatase [Source:HGNC Symbol;Acc:HGNC:15566]	-0.488258	7.42894	-2.83192	0.0159114	0.99919	-3.91422
ENSG00000100994	PYGB	phosphorylase, glycogen; brain [Source:HGNC Symbol;Acc:HGNC:9723]	0.473223	7.81727	2.83163	0.0159196	0.99919	-3.92188
ENSG00000130313	PGLS	6-phosphogluconolactonase [Source:HGNC Symbol;Acc:HGNC:8903]	0.445305	4.09045	2.82943	0.0159833	0.99919	-4.0034
ENSG00000277050	NA	NA	0.869404	1.55203	2.82377	0.0161478	0.99919	-4.26884
ENSG00000105404	RABAC1	Rab acceptor 1 [Source:HGNC Symbol;Acc:HGNC:9794]	0.477836	5.64746	2.82294	0.0161722	0.99919	-3.9245
ENSG00000181026	AEN	apoptosis enhancing nuclease [Source:HGNC Symbol;Acc:HGNC:25722]	-0.428584	6.36407	-2.82215	0.0161953	0.99919	-3.91674
ENSG00000101577	LPIN2	lipin 2 [Source:HGNC Symbol;Acc:HGNC:14450]	0.382858	4.39583	2.82054	0.0162427	0.99919	-3.98412
ENSG00000168621	GDNF	glial cell derived neurotrophic factor [Source:HGNC Symbol;Acc:HGNC:4232]	0.949826	-0.204489	2.8188	0.0162938	0.99919	-4.43381
ENSG00000163159	VPS72	vacuolar protein sorting 72 homolog [Source:HGNC Symbol;Acc:HGNC:11644]	-0.551906	5.793	-2.81765	0.0163277	0.99919	-3.93046
ENSG00000196754	S100A2	S100 calcium binding protein A2 [Source:HGNC Symbol;Acc:HGNC:10492]	0.786844	7.55468	2.81754	0.016331	0.99919	-3.92494
ENSG00000187608	ISG15	ISG15 ubiquitin-like modifier [Source:HGNC Symbol;Acc:HGNC:4053]	0.6003	4.86478	2.81629	0.0163679	0.99919	-3.95543
ENSG00000170903	MSANTD4	Myb/SANT DNA binding domain containing 4 with coiled-coils [Source:HGNC Symbol;Acc:HGNC:29383]	-0.357056	4.60946	-2.80546	0.0166921	0.99919	-3.98814
ENSG00000124508	BTN2A2	butyrophilin subfamily 2 member A2 [Source:HGNC Symbol;Acc:HGNC:1137]	0.583727	2.82323	2.80485	0.0167108	0.99919	-4.13089
ENSG00000272668	NA	NA	0.584773	1.88265	2.80367	0.0167463	0.99919	-4.24079
ENSG00000172458	IL17D	interleukin 17D [Source:HGNC Symbol;Acc:HGNC:5984]	0.730427	1.23282	2.8017	0.016806	0.99919	-4.31226
ENSG00000101363	MANBAL	mannosidase beta like [Source:HGNC Symbol;Acc:HGNC:15799]	0.409421	4.25156	2.79485	0.0170159	0.99919	-4.00306
ENSG00000184226	PCDH9	protocadherin 9 [Source:HGNC Symbol;Acc:HGNC:8661]	0.749665	1.59	2.79265	0.0170837	0.99919	-4.27424
ENSG00000135093	USP30	ubiquitin specific peptidase 30 [Source:HGNC Symbol;Acc:HGNC:20065]	0.509651	2.14431	2.79245	0.01709	0.99919	-4.21299
ENSG00000212907	MT-ND4L	mitochondrially encoded NADH:ubiquinone oxidoreductase core subunit 4L [Source:HGNC Symbol;Acc:HGNC:7460]	-0.43304	7.65013	-2.78875	0.0172048	0.99919	-3.93343
ENSG00000273391	NA	NA	0.615313	2.224	2.78824	0.0172207	0.99919	-4.20358
ENSG00000157851	DPYSL5	dihydropyrimidinase like 5 [Source:HGNC Symbol;Acc:HGNC:20637]	-0.594593	3.63787	-2.78707	0.0172572	0.99919	-4.08404
ENSG00000147133	TAF1	TATA-box binding protein associated factor 1 [Source:HGNC Symbol;Acc:HGNC:11535]	-0.571594	7.94783	-2.78571	0.0172998	0.99919	-3.93793
ENSG00000124920	MYRF	myelin regulatory factor [Source:HGNC Symbol;Acc:HGNC:1181]	-0.505493	2.33763	-2.78368	0.0173633	0.99919	-4.22217
ENSG00000175063	UBE2C	ubiquitin conjugating enzyme E2 C [Source:HGNC Symbol;Acc:HGNC:15937]	-0.481896	8.06622	-2.77318	0.0176965	0.99919	-3.94461
ENSG00000229348	HYI-AS1	HYI antisense RNA 1 [Source:HGNC Symbol;Acc:HGNC:41173]	0.709827	1.00988	2.76784	0.0178685	0.99919	-4.34102
ENSG00000168137	SETD5	SET domain containing 5 [Source:HGNC Symbol;Acc:HGNC:25566]	-0.349317	7.72263	-2.76772	0.0178724	0.99919	-3.94259
ENSG00000197124	ZNF682	zinc finger protein 682 [Source:HGNC Symbol;Acc:HGNC:28857]	0.636821	1.42664	2.76137	0.0180788	0.99919	-4.29777
ENSG00000140332	TLE3	transducin like enhancer of split 3 [Source:HGNC Symbol;Acc:HGNC:11839]	-0.321714	6.5208	-2.75995	0.0181253	0.99919	-3.9394
ENSG00000266278	NA	NA	-0.604119	1.67778	-2.75147	0.0184056	0.99919	-4.30751
ENSG00000120129	DUSP1	dual specificity phosphatase 1 [Source:HGNC Symbol;Acc:HGNC:3064]	0.727915	3.89629	2.75061	0.0184341	0.99919	-4.04124
ENSG00000272223	NA	NA	0.661906	0.601575	2.74976	0.0184625	0.99919	-4.38205
ENSG00000143375	CGN	cingulin [Source:HGNC Symbol;Acc:HGNC:17429]	0.734505	1.42741	2.74587	0.0185931	0.99919	-4.30037
ENSG00000160781	PAQR6	progestin and adipoQ receptor family member 6 [Source:HGNC Symbol;Acc:HGNC:30132]	-0.487045	5.49589	-2.74366	0.0186676	0.99919	-3.96719
ENSG00000273382	NA	NA	0.493291	3.58344	2.74076	0.0187656	0.99919	-4.07386
ENSG00000113368	LMNB1	lamin B1 [Source:HGNC Symbol;Acc:HGNC:6637]	-0.432616	7.61744	-2.73692	0.0188965	0.99919	-3.95331
ENSG00000197905	TEAD4	TEA domain transcription factor 4 [Source:HGNC Symbol;Acc:HGNC:11717]	-0.631337	4.56046	-2.73531	0.0189516	0.99919	-4.02337
ENSG00000134574	DDB2	damage specific DNA binding protein 2 [Source:HGNC Symbol;Acc:HGNC:2718]	0.474184	4.983	2.73352	0.0190131	0.99919	-3.98122
ENSG00000229119	NA	NA	0.699084	2.41348	2.73051	0.0191168	0.99919	-4.19247
ENSG00000170500	LONRF2	LON peptidase N-terminal domain and ring finger 2 [Source:HGNC Symbol;Acc:HGNC:24788]	0.499242	4.49165	2.72555	0.019289	0.99919	-4.00998
ENSG00000128185	DGCR6L	DiGeorge syndrome critical region gene 6-like [Source:HGNC Symbol;Acc:HGNC:18551]	0.521211	5.01526	2.72447	0.0193267	0.99919	-3.983
ENSG00000144746	ARL6IP5	ADP ribosylation factor like GTPase 6 interacting protein 5 [Source:HGNC Symbol;Acc:HGNC:16937]	0.401968	5.05213	2.71563	0.0196381	0.99919	-3.9855
ENSG00000160191	PDE9A	phosphodiesterase 9A [Source:HGNC Symbol;Acc:HGNC:8795]	0.580264	3.41386	2.71346	0.0197156	0.99919	-4.09665
ENSG00000127837	AAMP	angio associated migratory cell protein [Source:HGNC Symbol;Acc:HGNC:18]	-0.406143	8.97867	-2.71029	0.0198286	0.99919	-3.98333
ENSG00000187391	MAGI2	membrane associated guanylate kinase, WW and PDZ domain containing 2 [Source:HGNC Symbol;Acc:HGNC:18957]	-0.581714	1.28771	-2.70492	0.0200223	0.99919	-4.35332
ENSG00000136877	FPGS	folylpolyglutamate synthase [Source:HGNC Symbol;Acc:HGNC:3824]	-0.370519	6.91825	-2.70409	0.0200522	0.99919	-3.96116
ENSG00000229133	RPS7P4	ribosomal protein S7 pseudogene 4 [Source:HGNC Symbol;Acc:HGNC:36000]	1.10519	-0.539112	2.70138	0.0201506	0.99919	-4.46175
ENSG00000086589	RBM22	RNA binding motif protein 22 [Source:HGNC Symbol;Acc:HGNC:25503]	-0.512902	5.97106	-2.70137	0.0201509	0.99919	-3.97073
ENSG00000138347	MYPN	myopalladin [Source:HGNC Symbol;Acc:HGNC:23246]	0.675529	3.39202	2.68998	0.0205703	0.99919	-4.10416
ENSG00000157933	SKI	SKI proto-oncogene [Source:HGNC Symbol;Acc:HGNC:10896]	-0.517927	5.55202	-2.68923	0.020598	0.99919	-3.98681
ENSG00000185065	NA	NA	0.711633	2.04131	2.67987	0.0209495	0.99919	-4.24538
ENSG00000224945	NA	NA	-0.443764	3.39469	-2.67875	0.0209919	0.99919	-4.1317
ENSG00000125968	ID1	inhibitor of DNA binding 1, HLH protein [Source:HGNC Symbol;Acc:HGNC:5360]	-0.509403	6.47226	-2.67794	0.0210228	0.99919	-3.97299
ENSG00000134333	LDHA	lactate dehydrogenase A [Source:HGNC Symbol;Acc:HGNC:6535]	0.458804	7.65778	2.67676	0.0210673	0.99919	-3.97974
ENSG00000150471	ADGRL3	adhesion G protein-coupled receptor L3 [Source:HGNC Symbol;Acc:HGNC:20974]	0.712818	2.89726	2.67489	0.0211388	0.99919	-4.15517
ENSG00000206530	CFAP44	cilia and flagella associated protein 44 [Source:HGNC Symbol;Acc:HGNC:25631]	0.518424	2.24384	2.66903	0.0213638	0.99919	-4.22908
ENSG00000079739	PGM1	phosphoglucomutase 1 [Source:HGNC Symbol;Acc:HGNC:8905]	0.494978	5.12385	2.66734	0.0214289	0.99919	-4.00037
ENSG00000160172	FAM86C2P	family with sequence similarity 86 member C2, pseudogene [Source:HGNC Symbol;Acc:HGNC:42392]	-0.477409	3.82537	-2.66371	0.0215702	0.99919	-4.09972
ENSG00000163840	DTX3L	deltex E3 ubiquitin ligase 3L [Source:HGNC Symbol;Acc:HGNC:30323]	-0.454653	7.56569	-2.66329	0.0215863	0.99919	-3.98179
ENSG00000132326	PER2	period circadian clock 2 [Source:HGNC Symbol;Acc:HGNC:8846]	-0.526235	2.97717	-2.66091	0.0216795	0.99919	-4.18235
ENSG00000225335	NA	NA	0.59005	1.27586	2.66063	0.0216903	0.99919	-4.33079
ENSG00000074855	ANO8	anoctamin 8 [Source:HGNC Symbol;Acc:HGNC:29329]	-0.483271	4.67367	-2.66053	0.0216942	0.99919	-4.03809
ENSG00000020181	ADGRA2	adhesion G protein-coupled receptor A2 [Source:HGNC Symbol;Acc:HGNC:17849]	-0.699422	1.85903	-2.65686	0.0218383	0.99919	-4.30668
ENSG00000255468	NA	NA	0.74453	0.567004	2.65291	0.0219947	0.99919	-4.3954
ENSG00000279602	NA	NA	0.827735	0.238827	2.64961	0.0221263	0.99919	-4.42219
ENSG00000272405	NA	NA	-0.446031	5.85929	-2.64586	0.0222767	0.99919	-3.99425
ENSG00000274828	NA	NA	0.51145	2.00937	2.645	0.0223112	0.99919	-4.25882
ENSG00000186283	TOR3A	torsin family 3 member A [Source:HGNC Symbol;Acc:HGNC:11997]	-0.549231	6.51975	-2.64166	0.022446	0.99919	-3.98738
ENSG00000205593	DENND6B	DENN domain containing 6B [Source:HGNC Symbol;Acc:HGNC:32690]	-0.47307	1.93405	-2.64149	0.0224529	0.99919	-4.29347
ENSG00000133519	ZDHHC8P1	zinc finger DHHC-type containing 8 pseudogene 1 [Source:HGNC Symbol;Acc:HGNC:26461]	-0.495061	3.19757	-2.6372	0.0226275	0.99919	-4.16646
ENSG00000175602	CCDC85B	coiled-coil domain containing 85B [Source:HGNC Symbol;Acc:HGNC:24926]	-1.18538	3.77407	-2.63537	0.0227026	0.99919	-4.13267
ENSG00000230658	KLHL7-AS1	KLHL7 antisense RNA 1 (head to head) [Source:HGNC Symbol;Acc:HGNC:43431]	0.606585	1.02837	2.62892	0.0229681	0.99919	-4.36053
ENSG00000007944	MYLIP	myosin regulatory light chain interacting protein [Source:HGNC Symbol;Acc:HGNC:21155]	0.386351	3.27286	2.62734	0.0230338	0.99919	-4.13908
ENSG00000269416	LINC01224	long intergenic non-protein coding RNA 1224 [Source:HGNC Symbol;Acc:HGNC:49676]	0.399525	3.44788	2.62596	0.0230911	0.99919	-4.12368
ENSG00000095203	EPB41L4B	erythrocyte membrane protein band 4.1 like 4B [Source:HGNC Symbol;Acc:HGNC:19818]	-0.915026	0.0923813	-2.6257	0.0231019	0.99919	-4.45926
ENSG00000164690	SHH	sonic hedgehog [Source:HGNC Symbol;Acc:HGNC:10848]	0.569124	4.41163	2.62418	0.0231654	0.99919	-4.05039
ENSG00000172340	SUCLG2	succinate-CoA ligase GDP-forming beta subunit [Source:HGNC Symbol;Acc:HGNC:11450]	-0.793096	6.45784	-2.61452	0.0235725	0.99919	-4.00017
ENSG00000177030	DEAF1	DEAF1, transcription factor [Source:HGNC Symbol;Acc:HGNC:14677]	0.492619	5.42334	2.61437	0.0235791	0.99919	-4.01118
ENSG00000144580	CNOT9	CCR4-NOT transcription complex subunit 9 [Source:HGNC Symbol;Acc:HGNC:10445]	-0.324294	6.60816	-2.61322	0.0236282	0.99919	-3.99754
ENSG00000270147	NA	NA	0.962688	-0.0543762	2.60867	0.0238229	0.99919	-4.44248
ENSG00000100908	EMC9	ER membrane protein complex subunit 9 [Source:HGNC Symbol;Acc:HGNC:20273]	0.431422	5.2376	2.60857	0.0238272	0.99919	-4.0193
ENSG00000118292	C1orf54	chromosome 1 open reading frame 54 [Source:HGNC Symbol;Acc:HGNC:26258]	-0.619358	2.00927	-2.60745	0.0238752	0.99919	-4.30058
ENSG00000125347	IRF1	interferon regulatory factor 1 [Source:HGNC Symbol;Acc:HGNC:6116]	-0.32012	5.95794	-2.607	0.0238946	0.99919	-4.00673
ENSG00000011422	PLAUR	plasminogen activator, urokinase receptor [Source:HGNC Symbol;Acc:HGNC:9053]	-0.736547	5.91622	-2.60368	0.0240383	0.99919	-4.0124
ENSG00000214357	NEURL1B	neuralized E3 ubiquitin protein ligase 1B [Source:HGNC Symbol;Acc:HGNC:35422]	-0.507705	7.39678	-2.59963	0.0242143	0.99919	-4.00559
ENSG00000167797	CDK2AP2	cyclin dependent kinase 2 associated protein 2 [Source:HGNC Symbol;Acc:HGNC:30833]	-0.437741	4.95091	-2.5956	0.0243907	0.99919	-4.04557
ENSG00000213939	NA	NA	1.02154	2.67595	2.59505	0.0244149	0.99919	-4.19669
ENSG00000132182	NUP210	nucleoporin 210 [Source:HGNC Symbol;Acc:HGNC:30052]	-0.430539	6.6236	-2.59493	0.0244201	0.99919	-4.00521
ENSG00000130518	KIAA1683	KIAA1683 [Source:HGNC Symbol;Acc:HGNC:29350]	0.524283	2.17275	2.59342	0.0244868	0.99919	-4.25275
ENSG00000277462	ZNF670	zinc finger protein 670 [Source:HGNC Symbol;Acc:HGNC:28167]	-0.45698	2.92809	-2.59196	0.0245515	0.99919	-4.20317
ENSG00000120549	KIAA1217	KIAA1217 [Source:HGNC Symbol;Acc:HGNC:25428]	0.696766	1.65662	2.59132	0.0245797	0.99919	-4.30223
ENSG00000266258	NA	NA	-0.434607	2.84657	-2.58993	0.0246415	0.99919	-4.21022
ENSG00000160813	PPP1R35	protein phosphatase 1 regulatory subunit 35 [Source:HGNC Symbol;Acc:HGNC:28320]	-0.511582	5.82477	-2.58552	0.0248378	0.99919	-4.01964
ENSG00000148926	ADM	adrenomedullin [Source:HGNC Symbol;Acc:HGNC:259]	0.622223	3.81985	2.5851	0.0248569	0.99919	-4.10307
ENSG00000101040	ZMYND8	zinc finger MYND-type containing 8 [Source:HGNC Symbol;Acc:HGNC:9397]	-0.317501	7.46045	-2.58332	0.0249368	0.99919	-4.01289
ENSG00000160799	CCDC12	coiled-coil domain containing 12 [Source:HGNC Symbol;Acc:HGNC:28332]	-0.433833	5.25906	-2.58314	0.0249449	0.99919	-4.03675
ENSG00000261071	NA	NA	-0.538159	1.92458	-2.5819	0.0250004	0.99919	-4.31029
ENSG00000198934	MAGEE1	MAGE family member E1 [Source:HGNC Symbol;Acc:HGNC:24934]	-0.581642	2.92942	-2.58017	0.0250787	0.99919	-4.21123
ENSG00000235863	B3GALT4	beta-1,3-galactosyltransferase 4 [Source:HGNC Symbol;Acc:HGNC:919]	0.785148	0.627543	2.57799	0.0251774	0.99919	-4.39879
ENSG00000196456	ZNF775	zinc finger protein 775 [Source:HGNC Symbol;Acc:HGNC:28501]	0.653164	4.01157	2.5778	0.025186	0.99919	-4.09166
ENSG00000272017	NA	NA	0.606218	0.607969	2.57042	0.0255228	0.99919	-4.40533
ENSG00000117362	APH1A	aph-1 homolog A, gamma-secretase subunit [Source:HGNC Symbol;Acc:HGNC:29509]	-0.390883	9.39128	-2.56948	0.025566	0.99919	-4.04343
ENSG00000158406	HIST1H4H	histone cluster 1, H4h [Source:HGNC Symbol;Acc:HGNC:4788]	0.556259	1.82288	2.56276	0.0258775	0.99919	-4.29509
ENSG00000173727	NA	NA	0.855507	0.847526	2.56242	0.0258933	0.99919	-4.382
ENSG00000158050	DUSP2	dual specificity phosphatase 2 [Source:HGNC Symbol;Acc:HGNC:3068]	-0.584983	1.19712	-2.55896	0.0260552	0.99919	-4.38372
ENSG00000139793	MBNL2	muscleblind like splicing regulator 2 [Source:HGNC Symbol;Acc:HGNC:16746]	0.437229	4.08117	2.55786	0.0261067	0.99919	-4.09603
ENSG00000100263	RHBDD3	rhomboid domain containing 3 [Source:HGNC Symbol;Acc:HGNC:1308]	0.534756	4.05907	2.55707	0.0261441	0.99919	-4.09706
ENSG00000186081	KRT5	keratin 5 [Source:HGNC Symbol;Acc:HGNC:6442]	1.32526	-1.34176	2.55423	0.026278	0.99919	-4.50785
ENSG00000171658	NMRAL2P	NmrA like redox sensor 1 pseudogene 1 [Source:HGNC Symbol;Acc:HGNC:52332]	1.11543	-0.259789	2.55361	0.0263075	0.99919	-4.45893
ENSG00000111276	CDKN1B	cyclin dependent kinase inhibitor 1B [Source:HGNC Symbol;Acc:HGNC:1785]	0.348596	6.40649	2.55131	0.0264163	0.99919	-4.02231
ENSG00000029534	ANK1	ankyrin 1 [Source:HGNC Symbol;Acc:HGNC:492]	-0.530422	6.96565	-2.55055	0.0264525	0.99919	-4.02312
ENSG00000163737	PF4	platelet factor 4 [Source:HGNC Symbol;Acc:HGNC:8861]	-1.05239	-0.116013	-2.54806	0.0265715	0.99919	-4.48237
ENSG00000132003	ZSWIM4	zinc finger SWIM-type containing 4 [Source:HGNC Symbol;Acc:HGNC:25704]	-0.573139	1.6123	-2.54759	0.0265939	0.99919	-4.34454
ENSG00000220161	NA	FLJ35934 [Source:EntrezGene;Acc:400579]	1.02583	-0.722859	2.54313	0.0268083	0.99919	-4.48374
ENSG00000168542	COL3A1	collagen type III alpha 1 chain [Source:HGNC Symbol;Acc:HGNC:2201]	1.286	-0.637455	2.53986	0.0269666	0.99919	-4.47892
ENSG00000166199	ALKBH3	alkB homolog 3, alpha-ketoglutaratedependent dioxygenase [Source:HGNC Symbol;Acc:HGNC:30141]	0.480503	4.61424	2.53615	0.0271469	0.99919	-4.0724
ENSG00000081760	AACS	acetoacetyl-CoA synthetase [Source:HGNC Symbol;Acc:HGNC:21298]	0.308958	5.52659	2.53562	0.0271726	0.99919	-4.04043
ENSG00000114650	SCAP	SREBF chaperone [Source:HGNC Symbol;Acc:HGNC:30634]	-0.32948	6.37006	-2.53512	0.0271972	0.99919	-4.03034
ENSG00000214944	ARHGEF28	Rho guanine nucleotide exchange factor 28 [Source:HGNC Symbol;Acc:HGNC:30322]	-0.47613	3.6641	-2.53467	0.0272195	0.99919	-4.15436
ENSG00000115947	ORC4	origin recognition complex subunit 4 [Source:HGNC Symbol;Acc:HGNC:8490]	-0.448081	5.42195	-2.53428	0.0272383	0.99919	-4.05004
ENSG00000175854	SWI5	SWI5 homologous recombination repair protein [Source:HGNC Symbol;Acc:HGNC:31412]	-0.355085	6.79851	-2.5341	0.0272473	0.99919	-4.02939
ENSG00000171368	TPPP	tubulin polymerization promoting protein [Source:HGNC Symbol;Acc:HGNC:24164]	0.92171	3.70628	2.53141	0.0273793	0.99919	-4.12642
ENSG00000215417	MIR17HG	miR-17-92a-1 cluster host gene [Source:HGNC Symbol;Acc:HGNC:23564]	-0.53806	2.92477	-2.52997	0.0274503	0.99919	-4.22289
ENSG00000143398	PIP5K1A	phosphatidylinositol-4-phosphate 5-kinase type 1 alpha [Source:HGNC Symbol;Acc:HGNC:8994]	-0.346948	6.62531	-2.52611	0.0276416	0.99919	-4.03281
ENSG00000006062	MAP3K14	mitogen-activated protein kinase kinase kinase 14 [Source:HGNC Symbol;Acc:HGNC:6853]	-0.358147	4.92236	-2.52539	0.0276773	0.99919	-4.07159
ENSG00000164830	OXR1	oxidation resistance 1 [Source:HGNC Symbol;Acc:HGNC:15822]	0.689042	0.654017	2.52294	0.0277996	0.99919	-4.40484
ENSG00000231549	USMG5P1	USMG5 pseudogene 1 [Source:HGNC Symbol;Acc:HGNC:31716]	1.22744	-1.00439	2.52194	0.0278499	0.99919	-4.49614
ENSG00000125966	MMP24	matrix metallopeptidase 24 [Source:HGNC Symbol;Acc:HGNC:7172]	0.98579	-0.283138	2.51374	0.0282634	0.99919	-4.46416
ENSG00000247095	MIR210HG	MIR210 host gene [Source:HGNC Symbol;Acc:HGNC:39524]	0.646509	1.89709	2.51216	0.0283438	0.99919	-4.29658
ENSG00000136811	ODF2	outer dense fiber of sperm tails 2 [Source:HGNC Symbol;Acc:HGNC:8114]	-0.322294	5.71946	-2.51192	0.0283556	0.99919	-4.04955
ENSG00000161048	NAPEPLD	N-acyl phosphatidylethanolamine phospholipase D [Source:HGNC Symbol;Acc:HGNC:21683]	0.358815	4.36107	2.50906	0.0285021	0.99919	-4.09718
ENSG00000143320	CRABP2	cellular retinoic acid binding protein 2 [Source:HGNC Symbol;Acc:HGNC:2339]	-1.00367	-0.219889	-2.50904	0.0285028	0.99919	-4.48911
ENSG00000099795	NDUFB7	NADH:ubiquinone oxidoreductase subunit B7 [Source:HGNC Symbol;Acc:HGNC:7702]	0.788688	6.64274	2.50791	0.0285611	0.99919	-4.04078
ENSG00000204673	AKT1S1	AKT1 substrate 1 [Source:HGNC Symbol;Acc:HGNC:28426]	-0.938834	4.45822	-2.50405	0.0287596	0.99919	-4.1173
ENSG00000197275	RAD54B	RAD54 homolog B (S. cerevisiae) [Source:HGNC Symbol;Acc:HGNC:17228]	-0.780791	0.813374	-2.49643	0.0291559	0.99919	-4.42595
ENSG00000164548	TRA2A	transformer 2 alpha homolog [Source:HGNC Symbol;Acc:HGNC:16645]	-0.46772	9.17447	-2.49146	0.0294174	0.99919	-4.07025
ENSG00000121966	CXCR4	C-X-C motif chemokine receptor 4 [Source:HGNC Symbol;Acc:HGNC:2561]	1.21202	-0.625792	2.48777	0.0296127	0.99919	-4.48209
ENSG00000130159	ECSIT	ECSIT signalling integrator [Source:HGNC Symbol;Acc:HGNC:29548]	0.323071	4.88437	2.48344	0.029844	0.99919	-4.08147
ENSG00000173894	CBX2	chromobox 2 [Source:HGNC Symbol;Acc:HGNC:1552]	-0.409566	5.58195	-2.4805	0.0300017	0.99919	-4.06608
ENSG00000101353	MROH8	maestro heat like repeat family member 8 [Source:HGNC Symbol;Acc:HGNC:16125]	0.666189	1.18048	2.4789	0.0300879	0.99919	-4.3687
ENSG00000101146	RAE1	ribonucleic acid export 1 [Source:HGNC Symbol;Acc:HGNC:9828]	-0.343816	7.40528	-2.47762	0.0301573	0.99919	-4.05513
ENSG00000010310	GIPR	gastric inhibitory polypeptide receptor [Source:HGNC Symbol;Acc:HGNC:4271]	-0.528033	1.96633	-2.47466	0.0303177	0.99919	-4.32383
ENSG00000179222	MAGED1	MAGE family member D1 [Source:HGNC Symbol;Acc:HGNC:6813]	0.663756	7.80725	2.47343	0.0303846	0.99919	-4.0632
ENSG00000196639	HRH1	histamine receptor H1 [Source:HGNC Symbol;Acc:HGNC:5182]	-0.469913	3.07682	-2.47041	0.0305502	0.99919	-4.2216
ENSG00000181467	RAP2B	RAP2B, member of RAS oncogene family [Source:HGNC Symbol;Acc:HGNC:9862]	-0.309159	7.39884	-2.46204	0.0310122	0.99919	-4.06146
ENSG00000196363	WDR5	WD repeat domain 5 [Source:HGNC Symbol;Acc:HGNC:12757]	-0.381525	7.94548	-2.46112	0.0310629	0.99919	-4.06673
ENSG00000233287	NA	NA	0.937135	-0.790047	2.45493	0.0314095	0.99919	-4.49552
ENSG00000104142	VPS18	VPS18, CORVET/HOPS core subunit [Source:HGNC Symbol;Acc:HGNC:15972]	-0.495125	4.21582	-2.45394	0.0314653	0.99919	-4.13958
ENSG00000105298	CACTIN	cactin, spliceosome C complex subunit [Source:HGNC Symbol;Acc:HGNC:29938]	-0.388363	4.96188	-2.45022	0.0316759	0.99919	-4.09905
ENSG00000164056	SPRY1	sprouty RTK signaling antagonist 1 [Source:HGNC Symbol;Acc:HGNC:11269]	-0.592451	4.31248	-2.44994	0.0316918	0.99919	-4.13723
ENSG00000164889	SLC4A2	solute carrier family 4 member 2 [Source:HGNC Symbol;Acc:HGNC:11028]	0.577094	6.08592	2.44959	0.0317117	0.99919	-4.06593
ENSG00000279443	NA	NA	0.973777	-0.351175	2.44893	0.0317491	0.99919	-4.47423
ENSG00000141519	CCDC40	coiled-coil domain containing 40 [Source:HGNC Symbol;Acc:HGNC:26090]	-0.438457	1.95697	-2.44694	0.0318627	0.99919	-4.32736
ENSG00000165795	NDRG2	NDRG family member 2 [Source:HGNC Symbol;Acc:HGNC:14460]	-0.38367	4.66781	-2.44566	0.0319359	0.99919	-4.11416
ENSG00000068831	RASGRP2	RAS guanyl releasing protein 2 [Source:HGNC Symbol;Acc:HGNC:9879]	-0.862642	0.962996	-2.44478	0.0319863	0.99919	-4.42484
ENSG00000099203	TMED1	transmembrane p24 trafficking protein 1 [Source:HGNC Symbol;Acc:HGNC:17291]	0.386002	4.46662	2.4434	0.0320653	0.99919	-4.11539
ENSG00000178307	TMEM11	transmembrane protein 11 [Source:HGNC Symbol;Acc:HGNC:16823]	-0.468581	6.35689	-2.442	0.032146	0.99919	-4.06894
ENSG00000142961	MOB3C	MOB kinase activator 3C [Source:HGNC Symbol;Acc:HGNC:29800]	-0.457681	3.99484	-2.43982	0.0322719	0.99919	-4.15755
ENSG00000260000	NA	NA	0.732857	0.0984705	2.43939	0.0322968	0.99919	-4.45298
ENSG00000160193	WDR4	WD repeat domain 4 [Source:HGNC Symbol;Acc:HGNC:12756]	-0.301879	5.9652	-2.43777	0.0323904	0.99919	-4.07448
ENSG00000278107	NA	NA	0.448108	2.35878	2.43733	0.0324163	0.99919	-4.27284
ENSG00000129991	TNNI3	troponin I3, cardiac type [Source:HGNC Symbol;Acc:HGNC:11947]	-0.624835	2.03328	-2.43718	0.0324247	0.99919	-4.32869
ENSG00000143126	CELSR2	cadherin EGF LAG seven-pass G-type receptor 2 [Source:HGNC Symbol;Acc:HGNC:3231]	-0.502598	3.11757	-2.43534	0.0325319	0.99919	-4.22939
ENSG00000166192	SENP8	SUMO/sentrin peptidase family member, NEDD8 specific [Source:HGNC Symbol;Acc:HGNC:22992]	0.838275	-0.605583	2.43475	0.032566	0.99919	-4.48876
ENSG00000163739	CXCL1	C-X-C motif chemokine ligand 1 [Source:HGNC Symbol;Acc:HGNC:4602]	-0.415585	5.41263	-2.43452	0.0325798	0.99919	-4.08873
ENSG00000179104	TMTC2	transmembrane and tetratricopeptide repeat containing 2 [Source:HGNC Symbol;Acc:HGNC:25440]	0.421333	3.41194	2.43252	0.0326967	0.99919	-4.18558
ENSG00000151491	EPS8	epidermal growth factor receptor pathway substrate 8 [Source:HGNC Symbol;Acc:HGNC:3420]	0.766269	3.30586	2.43091	0.0327906	0.99919	-4.18968
ENSG00000171617	ENC1	ectodermal-neural cortex 1 [Source:HGNC Symbol;Acc:HGNC:3345]	-0.429923	7.28148	-2.43059	0.0328098	0.99919	-4.07334
ENSG00000152558	TMEM123	transmembrane protein 123 [Source:HGNC Symbol;Acc:HGNC:30138]	0.359458	6.19806	2.43001	0.0328438	0.99919	-4.07307
ENSG00000153406	NMRAL1	NmrA like redox sensor 1 [Source:HGNC Symbol;Acc:HGNC:24987]	0.41693	4.66404	2.42963	0.0328661	0.99919	-4.11056
ENSG00000196465	MYL6B	myosin light chain 6B [Source:HGNC Symbol;Acc:HGNC:29823]	0.42787	5.13973	2.42867	0.0329224	0.99919	-4.09275
ENSG00000062370	ZNF112	zinc finger protein 112 [Source:HGNC Symbol;Acc:HGNC:12892]	0.427447	1.84695	2.42808	0.0329576	0.99919	-4.32166
ENSG00000214063	TSPAN4	tetraspanin 4 [Source:HGNC Symbol;Acc:HGNC:11859]	0.608095	5.20026	2.42654	0.0330486	0.99919	-4.09116
ENSG00000278705	HIST1H4B	histone cluster 1, H4b [Source:HGNC Symbol;Acc:HGNC:4789]	0.779174	0.266063	2.42488	0.0331468	0.99919	-4.44377
ENSG00000171017	LRRC8E	leucine rich repeat containing 8 family member E [Source:HGNC Symbol;Acc:HGNC:26272]	-0.315767	4.61239	-2.42451	0.0331688	0.99919	-4.12405
ENSG00000108342	CSF3	colony stimulating factor 3 [Source:HGNC Symbol;Acc:HGNC:2438]	-0.666727	3.74668	-2.42339	0.0332353	0.99919	-4.18493
ENSG00000168389	MFSD2A	major facilitator superfamily domain containing 2A [Source:HGNC Symbol;Acc:HGNC:25897]	-0.546455	2.04955	-2.42301	0.0332575	0.99919	-4.32849
ENSG00000090263	MRPS33	mitochondrial ribosomal protein S33 [Source:HGNC Symbol;Acc:HGNC:16634]	-0.304326	6.97536	-2.42275	0.0332735	0.99919	-4.07511
ENSG00000183307	CECR6	cat eye syndrome chromosome region, candidate 6 [Source:HGNC Symbol;Acc:HGNC:1844]	-0.447981	2.22659	-2.41855	0.0335244	0.99919	-4.31061
ENSG00000068028	RASSF1	Ras association domain family member 1 [Source:HGNC Symbol;Acc:HGNC:9882]	-0.674521	5.17311	-2.41511	0.0337314	0.99919	-4.10768
ENSG00000114315	HES1	hes family bHLH transcription factor 1 [Source:HGNC Symbol;Acc:HGNC:5192]	-0.415677	3.87356	-2.41507	0.0337335	0.99919	-4.17332
ENSG00000125398	SOX9	SRY-box 9 [Source:HGNC Symbol;Acc:HGNC:11204]	-0.444878	6.01641	-2.41481	0.0337491	0.99919	-4.08387
ENSG00000070718	AP3M2	adaptor related protein complex 3 mu 2 subunit [Source:HGNC Symbol;Acc:HGNC:570]	-0.296422	5.37302	-2.41113	0.0339723	0.99919	-4.09813
ENSG00000187682	ERAS	ES cell expressed Ras [Source:HGNC Symbol;Acc:HGNC:5174]	0.751401	0.484299	2.41073	0.0339968	0.99919	-4.43034
ENSG00000108788	MLX	MLX, MAX dimerization protein [Source:HGNC Symbol;Acc:HGNC:11645]	-0.37476	3.95998	-2.41024	0.0340263	0.99919	-4.16863
ENSG00000140545	MFGE8	milk fat globule-EGF factor 8 protein [Source:HGNC Symbol;Acc:HGNC:7036]	-0.572018	6.38984	-2.40646	0.0342573	0.99919	-4.08378
ENSG00000157570	TSPAN18	tetraspanin 18 [Source:HGNC Symbol;Acc:HGNC:20660]	0.799005	-0.0219429	2.40173	0.0345479	0.99919	-4.46304
ENSG00000271040	NA	NA	0.831666	-0.355321	2.40019	0.0346435	0.99919	-4.47949
ENSG00000167378	IRGQ	immunity related GTPase Q [Source:HGNC Symbol;Acc:HGNC:24868]	-0.387478	6.60855	-2.39946	0.0346885	0.99919	-4.08481
ENSG00000196998	WDR45	WD repeat domain 45 [Source:HGNC Symbol;Acc:HGNC:28912]	0.484773	5.07365	2.39927	0.0347004	0.99919	-4.10612
ENSG00000104903	LYL1	LYL1, basic helix-loop-helix family member [Source:HGNC Symbol;Acc:HGNC:6734]	-0.6152	1.22459	-2.39827	0.0347621	0.99919	-4.40316
ENSG00000196352	CD55	CD55 molecule (Cromer blood group) [Source:HGNC Symbol;Acc:HGNC:2665]	0.666686	1.03305	2.39362	0.0350523	0.99919	-4.39423
ENSG00000135924	DNAJB2	DnaJ heat shock protein family (Hsp40) member B2 [Source:HGNC Symbol;Acc:HGNC:5228]	0.422094	4.73715	2.39307	0.035087	0.99919	-4.12115
ENSG00000153363	LINC00467	long intergenic non-protein coding RNA 467 [Source:HGNC Symbol;Acc:HGNC:28227]	-0.320523	5.02135	-2.39208	0.0351488	0.99919	-4.11774
ENSG00000163406	SLC15A2	solute carrier family 15 member 2 [Source:HGNC Symbol;Acc:HGNC:10921]	0.740004	0.988709	2.39034	0.035258	0.99919	-4.39737
ENSG00000137203	TFAP2A	transcription factor AP-2 alpha [Source:HGNC Symbol;Acc:HGNC:11742]	-0.443935	8.45475	-2.38757	0.0354332	0.99919	-4.10206
ENSG00000169926	KLF13	Kruppel like factor 13 [Source:HGNC Symbol;Acc:HGNC:13672]	-0.422285	4.01957	-2.38482	0.0356079	0.99919	-4.17413
ENSG00000172270	BSG	basigin (Ok blood group) [Source:HGNC Symbol;Acc:HGNC:1116]	0.710777	7.20259	2.38318	0.035712	0.99919	-4.09425
ENSG00000232346	NA	NA	0.509948	2.49274	2.38294	0.0357273	0.99919	-4.27471
ENSG00000235527	HIPK1-AS1	HIPK1 antisense RNA 1 [Source:HGNC Symbol;Acc:HGNC:50576]	0.583471	0.304693	2.38214	0.0357786	0.99919	-4.44782
ENSG00000205336	ADGRG1	adhesion G protein-coupled receptor G1 [Source:HGNC Symbol;Acc:HGNC:4512]	0.502663	2.5112	2.3819	0.035794	0.99919	-4.27155
ENSG00000144355	DLX1	distal-less homeobox 1 [Source:HGNC Symbol;Acc:HGNC:2914]	-0.53371	3.41816	-2.38049	0.0358838	0.99919	-4.22032
ENSG00000143382	ADAMTSL4	ADAMTS like 4 [Source:HGNC Symbol;Acc:HGNC:19706]	0.526282	2.306	2.37989	0.0359224	0.99919	-4.29008
ENSG00000108578	BLMH	bleomycin hydrolase [Source:HGNC Symbol;Acc:HGNC:1059]	-0.403244	7.23458	-2.37826	0.0360268	0.99919	-4.09452
ENSG00000158292	GPR153	G protein-coupled receptor 153 [Source:HGNC Symbol;Acc:HGNC:23618]	-0.394292	3.5534	-2.37621	0.0361591	0.99919	-4.20955
ENSG00000165861	ZFYVE1	zinc finger FYVE-type containing 1 [Source:HGNC Symbol;Acc:HGNC:13180]	0.515438	5.31525	2.37487	0.0362456	0.99919	-4.10877
ENSG00000167470	MIDN	midnolin [Source:HGNC Symbol;Acc:HGNC:16298]	-0.295487	5.80592	-2.37152	0.036463	0.99919	-4.10401
ENSG00000064666	CNN2	calponin 2 [Source:HGNC Symbol;Acc:HGNC:2156]	-0.492681	6.61015	-2.37011	0.0365547	0.99919	-4.09719
ENSG00000111907	TPD52L1	tumor protein D52-like 1 [Source:HGNC Symbol;Acc:HGNC:12006]	0.780456	0.563184	2.37001	0.0365618	0.99919	-4.42945
ENSG00000105088	OLFM2	olfactomedin 2 [Source:HGNC Symbol;Acc:HGNC:17189]	-0.817573	3.20104	-2.36976	0.0365781	0.99919	-4.25328
ENSG00000128641	MYO1B	myosin IB [Source:HGNC Symbol;Acc:HGNC:7596]	0.674312	0.980254	2.36957	0.0365902	0.99919	-4.40058
ENSG00000114268	PFKFB4	6-phosphofructo-2-kinase/fructose-2,6-biphosphatase 4 [Source:HGNC Symbol;Acc:HGNC:8875]	0.782429	1.30621	2.36835	0.0366701	0.99919	-4.37538
ENSG00000233426	EIF3FP3	eukaryotic translation initiation factor 3 subunit F pseudogene 3 [Source:HGNC Symbol;Acc:HGNC:37625]	1.02997	-1.16601	2.36743	0.0367302	0.99919	-4.51383
ENSG00000103066	PLA2G15	phospholipase A2 group XV [Source:HGNC Symbol;Acc:HGNC:17163]	0.366176	4.53737	2.36733	0.036737	0.99919	-4.14
ENSG00000173207	CKS1B	CDC28 protein kinase regulatory subunit 1B [Source:HGNC Symbol;Acc:HGNC:19083]	-0.323543	8.71857	-2.36686	0.0367673	0.99919	-4.11384
ENSG00000174871	CNIH2	cornichon family AMPA receptor auxiliary protein 2 [Source:HGNC Symbol;Acc:HGNC:28744]	-0.561666	1.27944	-2.36659	0.036785	0.99919	-4.40372
ENSG00000279591	NA	NA	0.562955	1.46768	2.36632	0.0368029	0.99919	-4.3649
ENSG00000018408	WWTR1	WW domain containing transcription regulator 1 [Source:HGNC Symbol;Acc:HGNC:24042]	-0.318224	6.64439	-2.36615	0.0368141	0.99919	-4.09825
ENSG00000132507	EIF5A	eukaryotic translation initiation factor 5A [Source:HGNC Symbol;Acc:HGNC:3300]	0.440526	6.66357	2.36609	0.0368183	0.99919	-4.09809
ENSG00000132821	VSTM2L	V-set and transmembrane domain containing 2 like [Source:HGNC Symbol;Acc:HGNC:16096]	-0.494113	3.64544	-2.36579	0.0368379	0.99919	-4.20749
ENSG00000006210	CX3CL1	C-X3-C motif chemokine ligand 1 [Source:HGNC Symbol;Acc:HGNC:10647]	-0.554038	1.55261	-2.36235	0.0370646	0.99919	-4.37917
ENSG00000100036	SLC35E4	solute carrier family 35 member E4 [Source:HGNC Symbol;Acc:HGNC:17058]	0.506488	1.66177	2.36229	0.0370686	0.99919	-4.35031
ENSG00000139200	PIANP	PILR alpha associated neural protein [Source:HGNC Symbol;Acc:HGNC:25338]	-0.586165	3.11031	-2.36155	0.0371171	0.99919	-4.25389
ENSG00000147174	GCNA	acidic repeat containing [Source:HGNC Symbol;Acc:HGNC:15805]	0.509219	1.56519	2.35931	0.0372657	0.99919	-4.35955
ENSG00000105438	KDELR1	KDEL endoplasmic reticulum protein retention receptor 1 [Source:HGNC Symbol;Acc:HGNC:6304]	-0.411733	9.78151	-2.35708	0.0374147	0.99919	-4.13034
ENSG00000085449	WDFY1	WD repeat and FYVE domain containing 1 [Source:HGNC Symbol;Acc:HGNC:20451]	-0.542156	3.25179	-2.35682	0.0374317	0.99919	-4.24013
ENSG00000162851	TFB2M	transcription factor B2, mitochondrial [Source:HGNC Symbol;Acc:HGNC:18559]	-0.613926	3.81946	-2.356	0.0374868	0.99919	-4.20198
ENSG00000104863	LIN7B	lin-7 homolog B, crumbs cell polarity complex component [Source:HGNC Symbol;Acc:HGNC:17788]	0.366564	2.92614	2.35566	0.0375094	0.99919	-4.24736
ENSG00000153714	LURAP1L	leucine rich adaptor protein 1 like [Source:HGNC Symbol;Acc:HGNC:31452]	0.366612	4.12473	2.35557	0.0375152	0.99919	-4.16553
ENSG00000226696	LENG8-AS1	LENG8 antisense RNA 1 [Source:HGNC Symbol;Acc:HGNC:40705]	1.01974	-0.72664	2.35541	0.0375261	0.99919	-4.49789
ENSG00000165028	NIPSNAP3B	nipsnap homolog 3B [Source:HGNC Symbol;Acc:HGNC:23641]	0.728357	0.126514	2.35509	0.0375475	0.99919	-4.46073
ENSG00000105011	ASF1B	anti-silencing function 1B histone chaperone [Source:HGNC Symbol;Acc:HGNC:20996]	-0.473035	7.19761	-2.35323	0.0376723	0.99919	-4.10462
ENSG00000249115	HAUS5	HAUS augmin like complex subunit 5 [Source:HGNC Symbol;Acc:HGNC:29130]	-0.460319	5.17591	-2.35286	0.0376966	0.99919	-4.12875
ENSG00000225131	PSME2P2	proteasome activator subunit 2 pseudogene 2 [Source:HGNC Symbol;Acc:HGNC:30160]	0.78774	0.0829187	2.35253	0.0377191	0.99919	-4.46242
ENSG00000259956	RBM15B	RNA binding motif protein 15B [Source:HGNC Symbol;Acc:HGNC:24303]	-0.422434	6.55279	-2.35008	0.037884	0.99919	-4.10541
ENSG00000119138	KLF9	Kruppel like factor 9 [Source:HGNC Symbol;Acc:HGNC:1123]	-0.543851	1.65544	-2.34642	0.0381323	0.99919	-4.37623
ENSG00000180998	GPR137C	G protein-coupled receptor 137C [Source:HGNC Symbol;Acc:HGNC:25445]	-0.563819	0.901499	-2.34619	0.0381479	0.99919	-4.43296
ENSG00000235363	SNRPGP10	small nuclear ribonucleoprotein polypeptide G pseudogene 10 [Source:HGNC Symbol;Acc:HGNC:39329]	1.2476	-0.48297	2.34512	0.0382206	0.99919	-4.4887
ENSG00000160953	MUM1	melanoma associated antigen (mutated) 1 [Source:HGNC Symbol;Acc:HGNC:29641]	-0.307112	5.98033	-2.34419	0.0382835	0.99919	-4.1124
ENSG00000180573	HIST1H2AC	histone cluster 1, H2ac [Source:HGNC Symbol;Acc:HGNC:4733]	0.422215	3.7185	2.34361	0.0383232	0.99919	-4.1934
ENSG00000104332	SFRP1	secreted frizzled related protein 1 [Source:HGNC Symbol;Acc:HGNC:10776]	-0.355995	5.10542	-2.34182	0.0384454	0.99919	-4.13469
ENSG00000249459	ZNF286B	zinc finger protein 286B [Source:HGNC Symbol;Acc:HGNC:33241]	0.774814	0.355597	2.3411	0.0384947	0.99919	-4.44795
ENSG00000146072	TNFRSF21	TNF receptor superfamily member 21 [Source:HGNC Symbol;Acc:HGNC:13469]	-0.673394	2.19215	-2.33851	0.038673	0.99919	-4.33793
ENSG00000160392	C19orf47	chromosome 19 open reading frame 47 [Source:HGNC Symbol;Acc:HGNC:26723]	-0.547382	4.94497	-2.33846	0.0386761	0.99919	-4.1442
ENSG00000197956	S100A6	S100 calcium binding protein A6 [Source:HGNC Symbol;Acc:HGNC:10496]	0.403661	11.6582	2.33386	0.0389946	0.99919	-4.1636
ENSG00000241680	RPL31P49	ribosomal protein L31 pseudogene 49 [Source:HGNC Symbol;Acc:HGNC:35909]	1.31832	-1.57935	2.33144	0.0391629	0.99919	-4.527
ENSG00000188636	LDOC1L	leucine zipper down-regulated in cancer 1 like [Source:HGNC Symbol;Acc:HGNC:13343]	-0.401281	4.68069	-2.33032	0.0392412	0.99919	-4.15717
ENSG00000179111	HES7	hes family bHLH transcription factor 7 [Source:HGNC Symbol;Acc:HGNC:15977]	0.579213	1.53387	2.33023	0.039247	0.99919	-4.3642
ENSG00000112079	STK38	serine/threonine kinase 38 [Source:HGNC Symbol;Acc:HGNC:17847]	-0.425998	7.35958	-2.32404	0.0396819	0.99919	-4.11762
ENSG00000128564	VGF	VGF nerve growth factor inducible [Source:HGNC Symbol;Acc:HGNC:12684]	-0.653731	1.38813	-2.32333	0.0397324	0.99919	-4.40529
ENSG00000101384	JAG1	jagged 1 [Source:HGNC Symbol;Acc:HGNC:6188]	-0.431369	4.6511	-2.32299	0.0397559	0.99919	-4.16169
ENSG00000279118	NA	NA	-0.704026	2.435	-2.32174	0.0398448	0.99919	-4.32143
ENSG00000099866	MADCAM1	mucosal vascular addressin cell adhesion molecule 1 [Source:HGNC Symbol;Acc:HGNC:6765]	0.564276	1.50227	2.31973	0.039987	0.99919	-4.37184
ENSG00000128228	SDF2L1	stromal cell derived factor 2 like 1 [Source:HGNC Symbol;Acc:HGNC:10676]	-0.528954	5.8468	-2.31891	0.0400455	0.99919	-4.12625
ENSG00000177426	TGIF1	TGFB induced factor homeobox 1 [Source:HGNC Symbol;Acc:HGNC:11776]	-0.339493	3.70218	-2.31855	0.0400715	0.99919	-4.21473
ENSG00000144843	ADPRH	ADP-ribosylarginine hydrolase [Source:HGNC Symbol;Acc:HGNC:269]	0.52375	2.29027	2.31735	0.040157	0.99919	-4.30678
ENSG00000241746	NA	NA	0.945735	-0.401078	2.31732	0.0401593	0.99919	-4.48888
ENSG00000154027	AK5	adenylate kinase 5 [Source:HGNC Symbol;Acc:HGNC:365]	0.624044	4.58401	2.31728	0.0401619	0.99919	-4.15487
ENSG00000264644	KRT18P8	keratin 18 pseudogene 8 [Source:HGNC Symbol;Acc:HGNC:31093]	0.562674	2.17863	2.31665	0.0402072	0.99919	-4.31665
ENSG00000129562	DAD1	defender against cell death 1 [Source:HGNC Symbol;Acc:HGNC:2664]	0.271984	5.95393	2.31397	0.040399	0.99919	-4.12307
ENSG00000185442	FAM174B	family with sequence similarity 174 member B [Source:HGNC Symbol;Acc:HGNC:34339]	0.781295	0.136741	2.30962	0.0407127	0.99919	-4.46396
ENSG00000167552	TUBA1A	tubulin alpha 1a [Source:HGNC Symbol;Acc:HGNC:20766]	0.745763	9.54066	2.30919	0.0407433	0.99919	-4.14941
ENSG00000175137	SH3BP5L	SH3 binding domain protein 5 like [Source:HGNC Symbol;Acc:HGNC:29360]	-0.592434	5.9354	-2.30835	0.0408047	0.99919	-4.12949
ENSG00000204435	CSNK2B	casein kinase 2 beta [Source:HGNC Symbol;Acc:HGNC:2460]	-0.375931	6.80554	-2.30477	0.0410651	0.99919	-4.12365
ENSG00000089091	DZANK1	double zinc ribbon and ankyrin repeat domains 1 [Source:HGNC Symbol;Acc:HGNC:15858]	-0.663226	0.832157	-2.30429	0.0410999	0.99919	-4.44512
ENSG00000258056	NA	NA	0.560062	1.97091	2.30376	0.0411385	0.99919	-4.33436
ENSG00000006025	OSBPL7	oxysterol binding protein like 7 [Source:HGNC Symbol;Acc:HGNC:16387]	0.881565	-0.555244	2.30071	0.041362	0.99919	-4.49621
ENSG00000144381	HSPD1	heat shock protein family D (Hsp60) member 1 [Source:HGNC Symbol;Acc:HGNC:5261]	-0.490364	9.18975	-2.30034	0.0413894	0.99919	-4.14533
ENSG00000165730	STOX1	storkhead box 1 [Source:HGNC Symbol;Acc:HGNC:23508]	-0.457201	2.0069	-2.29753	0.0415961	0.99919	-4.35483
ENSG00000243629	LINC00880	long intergenic non-protein coding RNA 880 [Source:HGNC Symbol;Acc:HGNC:27948]	0.819312	0.307663	2.29611	0.0417016	0.99919	-4.45489
ENSG00000171928	TVP23B	trans-golgi network vesicle protein 23 homolog B (S. cerevisiae) [Source:HGNC Symbol;Acc:HGNC:20399]	0.751551	0.131669	2.29585	0.0417203	0.99919	-4.46487
ENSG00000179241	LDLRAD3	low density lipoprotein receptor class A domain containing 3 [Source:HGNC Symbol;Acc:HGNC:27046]	-0.376387	5.84449	-2.29494	0.0417881	0.99919	-4.13499
ENSG00000170677	SOCS6	suppressor of cytokine signaling 6 [Source:HGNC Symbol;Acc:HGNC:16833]	-0.352933	6.4438	-2.29483	0.0417959	0.99919	-4.1285
ENSG00000164754	RAD21	RAD21 cohesin complex component [Source:HGNC Symbol;Acc:HGNC:9811]	-0.334036	7.06658	-2.29404	0.0418553	0.99919	-4.12855
ENSG00000130725	UBE2M	ubiquitin conjugating enzyme E2 M [Source:HGNC Symbol;Acc:HGNC:12491]	0.535027	5.84318	2.29235	0.0419808	0.99919	-4.13284
ENSG00000141562	NARF	nuclear prelamin A recognition factor [Source:HGNC Symbol;Acc:HGNC:29916]	0.342306	5.38484	2.28974	0.0421755	0.99919	-4.14195
ENSG00000168802	CHTF8	chromosome transmission fidelity factor 8 [Source:HGNC Symbol;Acc:HGNC:24353]	-0.319988	8.12128	-2.28963	0.0421838	0.99919	-4.13816
ENSG00000201221	RNU4-40P	RNA, U4 small nuclear 40, pseudogene [Source:HGNC Symbol;Acc:HGNC:46976]	0.589661	0.999998	2.28868	0.0422547	0.99919	-4.41384
ENSG00000162997	PRORSD1P	prolyl-tRNA synthetase associated domain containing 1, pseudogene [Source:HGNC Symbol;Acc:HGNC:34379]	0.401176	2.3742	2.28865	0.0422571	0.99919	-4.30827
ENSG00000271009	NA	NA	0.612183	1.13122	2.28805	0.0423022	0.99919	-4.40362
ENSG00000123179	EBPL	emopamil binding protein like [Source:HGNC Symbol;Acc:HGNC:18061]	-0.343756	5.49019	-2.28599	0.0424569	0.99919	-4.14536
ENSG00000149716	ORAOV1	oral cancer overexpressed 1 [Source:HGNC Symbol;Acc:HGNC:17589]	-0.448062	5.11936	-2.2855	0.0424942	0.99919	-4.15701
ENSG00000173327	MAP3K11	mitogen-activated protein kinase kinase kinase 11 [Source:HGNC Symbol;Acc:HGNC:6850]	0.429533	4.3337	2.28456	0.0425648	0.99919	-4.1795
ENSG00000114867	EIF4G1	eukaryotic translation initiation factor 4 gamma 1 [Source:HGNC Symbol;Acc:HGNC:3296]	0.48647	8.92841	2.28453	0.042567	0.99919	-4.15133
ENSG00000115368	WDR75	WD repeat domain 75 [Source:HGNC Symbol;Acc:HGNC:25725]	-0.315109	6.04936	-2.28382	0.0426209	0.99919	-4.13628
ENSG00000232803	SLCO4A1-AS1	SLCO4A1 antisense RNA 1 [Source:HGNC Symbol;Acc:HGNC:40537]	1.32305	-1.11952	2.28273	0.0427032	0.99919	-4.51547
ENSG00000185860	CCDC190	coiled-coil domain containing 190 [Source:HGNC Symbol;Acc:HGNC:28736]	0.507534	5.17635	2.28089	0.0428431	0.99919	-4.14992
ENSG00000131899	LLGL1	LLGL1, scribble cell polarity complex component [Source:HGNC Symbol;Acc:HGNC:6628]	-0.3634	5.64971	-2.28067	0.0428599	0.99919	-4.14428
ENSG00000224934	NA	NA	0.440089	1.86444	2.27894	0.0429913	0.99919	-4.35086
ENSG00000154930	ACSS1	acyl-CoA synthetase short-chain family member 1 [Source:HGNC Symbol;Acc:HGNC:16091]	0.542862	5.15001	2.27824	0.0430452	0.99919	-4.1515
ENSG00000120896	SORBS3	sorbin and SH3 domain containing 3 [Source:HGNC Symbol;Acc:HGNC:30907]	0.391663	4.18367	2.27566	0.0432426	0.99919	-4.19058
ENSG00000280316	NA	NA	0.770723	-0.280554	2.27477	0.0433107	0.99919	-4.48847
ENSG00000171204	TMEM126B	transmembrane protein 126B [Source:HGNC Symbol;Acc:HGNC:30883]	0.322073	3.96105	2.27399	0.0433704	0.99919	-4.2036
ENSG00000167799	NUDT8	nudix hydrolase 8 [Source:HGNC Symbol;Acc:HGNC:8055]	0.574667	1.94363	2.2734	0.0434156	0.99919	-4.34333
ENSG00000107679	PLEKHA1	pleckstrin homology domain containing A1 [Source:HGNC Symbol;Acc:HGNC:14335]	0.342811	3.84708	2.27183	0.0435367	0.99919	-4.21069
ENSG00000267060	PTGES3L	prostaglandin E synthase 3 like [Source:HGNC Symbol;Acc:HGNC:43943]	-0.598876	1.04701	-2.26958	0.0437112	0.99919	-4.43223
ENSG00000161682	FAM171A2	family with sequence similarity 171 member A2 [Source:HGNC Symbol;Acc:HGNC:30480]	-0.584616	4.91463	-2.26875	0.0437751	0.99919	-4.17234
ENSG00000227057	WDR46	WD repeat domain 46 [Source:HGNC Symbol;Acc:HGNC:13923]	-0.475335	5.97251	-2.26764	0.0438616	0.99919	-4.14472
ENSG00000116574	RHOU	ras homolog family member U [Source:HGNC Symbol;Acc:HGNC:17794]	0.545122	2.47693	2.2675	0.0438723	0.99919	-4.30384
ENSG00000163125	RPRD2	regulation of nuclear pre-mRNA domain containing 2 [Source:HGNC Symbol;Acc:HGNC:29039]	-0.308134	6.3121	-2.26584	0.0440011	0.99919	-4.14111
ENSG00000272040	NA	NA	0.700976	2.07258	2.26541	0.0440348	0.99919	-4.33313
ENSG00000099282	TSPAN15	tetraspanin 15 [Source:HGNC Symbol;Acc:HGNC:23298]	0.515259	4.27953	2.2645	0.0441064	0.99919	-4.1888
ENSG00000177839	PCDHB9	protocadherin beta 9 [Source:HGNC Symbol;Acc:HGNC:8694]	0.991529	-0.997122	2.26389	0.0441534	0.99919	-4.51524
ENSG00000122705	CLTA	clathrin light chain A [Source:HGNC Symbol;Acc:HGNC:2090]	-0.415768	8.41142	-2.26352	0.044183	0.99919	-4.15156
ENSG00000125652	ALKBH7	alkB homolog 7 [Source:HGNC Symbol;Acc:HGNC:21306]	0.49775	4.40487	2.26234	0.0442749	0.99919	-4.18395
ENSG00000162641	AKNAD1	AKNA domain containing 1 [Source:HGNC Symbol;Acc:HGNC:28398]	0.645829	1.0603	2.26223	0.0442838	0.99919	-4.41202
ENSG00000120694	HSPH1	heat shock protein family H (Hsp110) member 1 [Source:HGNC Symbol;Acc:HGNC:16969]	-0.284359	8.52279	-2.26088	0.0443898	0.99919	-4.15412
ENSG00000163644	PPM1K	protein phosphatase, Mg2+/Mn2+ dependent 1K [Source:HGNC Symbol;Acc:HGNC:25415]	0.640449	1.61267	2.26076	0.0443994	0.99919	-4.37148
ENSG00000272990	NA	NA	0.496015	1.46254	2.25928	0.0445158	0.99919	-4.38523
ENSG00000256079	NA	NA	-0.524781	3.87576	-2.25908	0.0445312	0.99919	-4.22831
ENSG00000196220	SRGAP3	SLIT-ROBO Rho GTPase activating protein 3 [Source:HGNC Symbol;Acc:HGNC:19744]	0.457261	3.75086	2.25907	0.0445319	0.99919	-4.21958
ENSG00000255857	PXN-AS1	PXN antisense RNA 1 [Source:HGNC Symbol;Acc:HGNC:44123]	0.463557	1.88327	2.25845	0.0445814	0.99919	-4.35456
ENSG00000224411	HSP90AA2P	heat shock protein 90 alpha family class A member 2, pseudogene [Source:HGNC Symbol;Acc:HGNC:5256]	0.703955	0.717256	2.25831	0.0445923	0.99919	-4.43762
ENSG00000172795	DCP2	decapping mRNA 2 [Source:HGNC Symbol;Acc:HGNC:24452]	-0.341242	4.92492	-2.25788	0.0446264	0.99919	-4.17341
ENSG00000070444	MNT	MAX network transcriptional repressor [Source:HGNC Symbol;Acc:HGNC:7188]	-0.313288	3.89027	-2.25746	0.0446592	0.99919	-4.22303
ENSG00000002079	MYH16	myosin heavy chain 16 pseudogene [Source:HGNC Symbol;Acc:HGNC:31038]	0.742095	5.47077	2.25741	0.0446634	0.99919	-4.15234
ENSG00000221539	SNORD99	small nucleolar RNA, C/D box 99 [Source:HGNC Symbol;Acc:HGNC:32762]	0.712627	1.65859	2.25718	0.0446819	0.99919	-4.36692
ENSG00000170412	GPRC5C	G protein-coupled receptor class C group 5 member C [Source:HGNC Symbol;Acc:HGNC:13309]	-0.44443	4.9158	-2.25688	0.0447049	0.99919	-4.17517
ENSG00000187837	HIST1H1C	histone cluster 1, H1c [Source:HGNC Symbol;Acc:HGNC:4716]	0.319417	6.54691	2.25554	0.0448115	0.99919	-4.14371
ENSG00000160447	PKN3	protein kinase N3 [Source:HGNC Symbol;Acc:HGNC:17999]	-0.311349	5.01694	-2.25526	0.0448336	0.99919	-4.17071
ENSG00000129116	PALLD	palladin, cytoskeletal associated protein [Source:HGNC Symbol;Acc:HGNC:17068]	0.598309	1.51771	2.25434	0.0449064	0.99919	-4.38
ENSG00000142634	EFHD2	EF-hand domain family member D2 [Source:HGNC Symbol;Acc:HGNC:28670]	0.286322	4.88185	2.25324	0.0449939	0.99919	-4.17067
ENSG00000107862	GBF1	golgi brefeldin A resistant guanine nucleotide exchange factor 1 [Source:HGNC Symbol;Acc:HGNC:4181]	-0.472029	6.47083	-2.25313	0.0450028	0.99919	-4.14604
ENSG00000171552	BCL2L1	BCL2 like 1 [Source:HGNC Symbol;Acc:HGNC:992]	0.421254	3.44171	2.2531	0.0450055	0.99919	-4.24096
ENSG00000130382	MLLT1	MLLT1, super elongation complex subunit [Source:HGNC Symbol;Acc:HGNC:7134]	-0.319519	5.96039	-2.2525	0.0450529	0.99919	-4.15028
ENSG00000236698	EIF1AXP1	eukaryotic translation initiation factor 1A, X-linked pseudogene 1 [Source:HGNC Symbol;Acc:HGNC:19900]	1.0035	-0.846484	2.25235	0.0450649	0.99919	-4.51018
ENSG00000162105	SHANK2	SH3 and multiple ankyrin repeat domains 2 [Source:HGNC Symbol;Acc:HGNC:14295]	-0.436538	3.38837	-2.25177	0.0451113	0.99919	-4.2588
ENSG00000187951	ARHGAP11B	Rho GTPase activating protein 11B [Source:HGNC Symbol;Acc:HGNC:15782]	-0.363476	3.16634	-2.25102	0.0451715	0.99919	-4.27414
ENSG00000135720	DYNC1LI2	dynein cytoplasmic 1 light intermediate chain 2 [Source:HGNC Symbol;Acc:HGNC:2966]	-0.375871	7.90076	-2.24819	0.0453984	0.99919	-4.1529
ENSG00000243517	NA	NA	0.486422	2.78921	2.24634	0.045547	0.99919	-4.28816
ENSG00000257178	MIR10A	microRNA 10a [Source:HGNC Symbol;Acc:HGNC:31497]	-0.888474	1.39473	-2.24434	0.0457086	0.99919	-4.41853
ENSG00000106948	AKNA	AT-hook transcription factor [Source:HGNC Symbol;Acc:HGNC:24108]	-0.584036	2.2878	-2.24355	0.045772	0.99919	-4.34871
ENSG00000177181	RIMKLA	ribosomal modification protein rimK like family member A [Source:HGNC Symbol;Acc:HGNC:28725]	0.877615	1.38396	2.24132	0.0459533	0.99919	-4.39055
ENSG00000168883	USP39	ubiquitin specific peptidase 39 [Source:HGNC Symbol;Acc:HGNC:20071]	-0.294082	5.76825	-2.23807	0.0462178	0.99919	-4.15896
ENSG00000162385	MAGOH	mago homolog, exon junction complex core component [Source:HGNC Symbol;Acc:HGNC:6815]	-0.497236	7.48622	-2.23497	0.0464723	0.99919	-4.15514
ENSG00000135540	NHSL1	NHS like 1 [Source:HGNC Symbol;Acc:HGNC:21021]	-0.301704	3.71858	-2.23455	0.0465062	0.99919	-4.24042
ENSG00000185825	BCAP31	B-cell receptor-associated protein 31 [Source:HGNC Symbol;Acc:HGNC:16695]	-0.370478	8.20832	-2.23407	0.0465455	0.99919	-4.16151
ENSG00000183840	GPR39	G protein-coupled receptor 39 [Source:HGNC Symbol;Acc:HGNC:4496]	0.476759	2.41667	2.23383	0.0465654	0.99919	-4.31822
ENSG00000130294	KIF1A	kinesin family member 1A [Source:HGNC Symbol;Acc:HGNC:888]	-0.349858	3.70591	-2.23358	0.0465865	0.99919	-4.24293
ENSG00000260276	NA	NA	-0.926489	-0.442856	-2.23335	0.0466054	0.99919	-4.5152
ENSG00000112293	GPLD1	glycosylphosphatidylinositol specific phospholipase D1 [Source:HGNC Symbol;Acc:HGNC:4459]	0.61845	1.41544	2.2324	0.0466837	0.99919	-4.3912
ENSG00000225195	NA	NA	-1.42319	-0.31307	-2.2305	0.0468408	0.99919	-4.51754
ENSG00000158373	HIST1H2BD	histone cluster 1, H2bd [Source:HGNC Symbol;Acc:HGNC:4747]	0.334373	3.47869	2.22966	0.0469097	0.99919	-4.2469
ENSG00000112473	SLC39A7	solute carrier family 39 member 7 [Source:HGNC Symbol;Acc:HGNC:4927]	-0.472721	6.17188	-2.22927	0.0469426	0.99919	-4.1581
ENSG00000130522	JUND	JunD proto-oncogene, AP-1 transcription factor subunit [Source:HGNC Symbol;Acc:HGNC:6206]	-0.364881	5.81654	-2.22908	0.0469577	0.99919	-4.16217
ENSG00000189337	KAZN	kazrin, periplakin interacting protein [Source:HGNC Symbol;Acc:HGNC:29173]	-0.529109	3.46406	-2.2274	0.0470975	0.99919	-4.2646
ENSG00000105516	DBP	D-box binding PAR bZIP transcription factor [Source:HGNC Symbol;Acc:HGNC:2697]	0.443485	4.14214	2.22691	0.0471384	0.99919	-4.20987
ENSG00000003137	CYP26B1	cytochrome P450 family 26 subfamily B member 1 [Source:HGNC Symbol;Acc:HGNC:20581]	0.453204	2.73919	2.2267	0.0471558	0.99919	-4.29641
ENSG00000102109	PCSK1N	proprotein convertase subtilisin/kexin type 1 inhibitor [Source:HGNC Symbol;Acc:HGNC:17301]	0.82489	1.54847	2.22541	0.0472632	0.99919	-4.38103
ENSG00000183935	HTR7P1	5-hydroxytryptamine receptor 7 pseudogene 1 [Source:HGNC Symbol;Acc:HGNC:30411]	0.438695	2.15313	2.2252	0.0472809	0.99919	-4.33981
ENSG00000272092	NA	NA	0.623575	0.524568	2.22398	0.0473829	0.99919	-4.45393
ENSG00000160087	UBE2J2	ubiquitin conjugating enzyme E2 J2 [Source:HGNC Symbol;Acc:HGNC:19268]	-0.277331	7.29064	-2.22285	0.0474773	0.99919	-4.15912
ENSG00000240399	NA	NA	-1.25221	-0.631888	-2.22281	0.047481	0.99919	-4.52349
ENSG00000119541	VPS4B	vacuolar protein sorting 4 homolog B [Source:HGNC Symbol;Acc:HGNC:10895]	-0.356719	6.44284	-2.22109	0.0476256	0.99919	-4.15909
ENSG00000165886	UBTD1	ubiquitin domain containing 1 [Source:HGNC Symbol;Acc:HGNC:25683]	0.560217	7.58622	2.21998	0.0477184	0.99919	-4.16375
ENSG00000146021	KLHL3	kelch like family member 3 [Source:HGNC Symbol;Acc:HGNC:6354]	0.518046	2.358	2.21982	0.0477325	0.99919	-4.32412
ENSG00000206560	ANKRD28	ankyrin repeat domain 28 [Source:HGNC Symbol;Acc:HGNC:29024]	-0.296894	5.91187	-2.21962	0.0477488	0.99919	-4.16432
ENSG00000197191	CYSRT1	cysteine rich tail 1 [Source:HGNC Symbol;Acc:HGNC:30529]	0.637563	0.0382811	2.21864	0.0478317	0.99919	-4.47982
ENSG00000135828	RNASEL	ribonuclease L [Source:HGNC Symbol;Acc:HGNC:10050]	0.751258	0.652839	2.21782	0.0479011	0.99919	-4.4439
ENSG00000108349	CASC3	cancer susceptibility candidate 3 [Source:HGNC Symbol;Acc:HGNC:17040]	-0.297116	7.54382	-2.21716	0.047957	0.99919	-4.16304
ENSG00000163297	ANTXR2	anthrax toxin receptor 2 [Source:HGNC Symbol;Acc:HGNC:21732]	0.448926	4.90877	2.21442	0.0481895	0.99919	-4.18396
ENSG00000103269	RHBDL1	rhomboid like 1 [Source:HGNC Symbol;Acc:HGNC:10007]	0.581503	3.11648	2.21415	0.0482119	0.99919	-4.27185
ENSG00000162408	NOL9	nucleolar protein 9 [Source:HGNC Symbol;Acc:HGNC:26265]	-0.346936	6.89972	-2.2135	0.0482673	0.99919	-4.16157
ENSG00000152556	PFKM	phosphofructokinase, muscle [Source:HGNC Symbol;Acc:HGNC:8877]	0.41106	5.93224	2.21343	0.0482739	0.99919	-4.16452
ENSG00000198142	SOWAHC	sosondowah ankyrin repeat domain family member C [Source:HGNC Symbol;Acc:HGNC:26149]	-0.398845	4.4013	-2.2127	0.0483354	0.99919	-4.21322
ENSG00000064933	PMS1	PMS1 homolog 1, mismatch repair system component [Source:HGNC Symbol;Acc:HGNC:9121]	-0.289266	4.64905	-2.212	0.0483957	0.99919	-4.20071
ENSG00000133131	MORC4	MORC family CW-type zinc finger 4 [Source:HGNC Symbol;Acc:HGNC:23485]	-0.355435	3.26213	-2.21171	0.0484204	0.99919	-4.27759
ENSG00000151240	DIP2C	disco interacting protein 2 homolog C [Source:HGNC Symbol;Acc:HGNC:29150]	-0.423747	5.48258	-2.21094	0.0484865	0.99919	-4.17641
ENSG00000144040	SFXN5	sideroflexin 5 [Source:HGNC Symbol;Acc:HGNC:16073]	0.273418	5.39448	2.21016	0.0485532	0.99919	-4.17413
ENSG00000168264	IRF2BP2	interferon regulatory factor 2 binding protein 2 [Source:HGNC Symbol;Acc:HGNC:21729]	-0.279678	7.73102	-2.20709	0.0488162	0.99919	-4.16854
ENSG00000101972	STAG2	stromal antigen 2 [Source:HGNC Symbol;Acc:HGNC:11355]	-0.464981	6.45501	-2.20548	0.0489548	0.99919	-4.16584
ENSG00000126778	SIX1	SIX homeobox 1 [Source:HGNC Symbol;Acc:HGNC:10887]	-0.312735	6.03391	-2.2041	0.0490745	0.99919	-4.16924
ENSG00000177565	TBL1XR1	transducin beta like 1 X-linked receptor 1 [Source:HGNC Symbol;Acc:HGNC:29529]	-0.296303	6.14452	-2.20383	0.0490975	0.99919	-4.16807
ENSG00000258634	NA	NA	0.419023	3.24767	2.20214	0.0492439	0.99919	-4.26885
ENSG00000174231	PRPF8	pre-mRNA processing factor 8 [Source:HGNC Symbol;Acc:HGNC:17340]	-0.483682	7.49224	-2.2021	0.0492482	0.99919	-4.16877
ENSG00000173805	HAP1	huntingtin associated protein 1 [Source:HGNC Symbol;Acc:HGNC:4812]	-0.675143	1.87182	-2.20207	0.0492505	0.99919	-4.39232
ENSG00000135454	B4GALNT1	beta-1,4-N-acetyl-galactosaminyltransferase 1 [Source:HGNC Symbol;Acc:HGNC:4117]	-0.401631	3.74229	-2.20187	0.0492678	0.99919	-4.25236
ENSG00000167526	RPL13	ribosomal protein L13 [Source:HGNC Symbol;Acc:HGNC:10303]	0.36063	11.2977	2.20167	0.0492848	0.99919	-4.20816
ENSG00000124191	TOX2	TOX high mobility group box family member 2 [Source:HGNC Symbol;Acc:HGNC:16095]	-0.358602	5.57676	-2.20101	0.0493421	0.99919	-4.17771
ENSG00000177352	CCDC71	coiled-coil domain containing 71 [Source:HGNC Symbol;Acc:HGNC:25760]	-0.562052	3.21293	-2.19991	0.0494379	0.99919	-4.29042
ENSG00000205903	ZNF316	zinc finger protein 316 [Source:HGNC Symbol;Acc:HGNC:13843]	-0.343837	6.83579	-2.19932	0.0494899	0.99919	-4.16739
ENSG00000261033	NA	NA	0.538473	0.937557	2.19447	0.0499146	0.99919	-4.43216
ENSG00000189298	ZKSCAN3	zinc finger with KRAB and SCAN domains 3 [Source:HGNC Symbol;Acc:HGNC:13853]	-0.400525	3.21209	-2.19374	0.0499789	0.99919	-4.28802
ENSG00000136371	MTHFS	5,10-methenyltetrahydrofolate synthetase (5-formyltetrahydrofolate cyclo-ligase) [Source:HGNC Symbol;Acc:HGNC:7437]	-0.751009	0.242947	-2.19287	0.0500554	0.99919	-4.48985
ENSG00000166311	SMPD1	sphingomyelin phosphodiesterase 1 [Source:HGNC Symbol;Acc:HGNC:11120]	0.474823	4.05994	2.19274	0.0500663	0.99919	-4.22536
ENSG00000128340	RAC2	ras-related C3 botulinum toxin substrate 2 (rho family, small GTP binding protein Rac2) [Source:HGNC Symbol;Acc:HGNC:9802]	0.696799	-0.421963	2.19272	0.0500688	0.99919	-4.50141
ENSG00000186352	ANKRD37	ankyrin repeat domain 37 [Source:HGNC Symbol;Acc:HGNC:29593]	0.612449	1.96193	2.19011	0.0502995	0.99919	-4.35953
ENSG00000100836	PABPN1	poly(A) binding protein nuclear 1 [Source:HGNC Symbol;Acc:HGNC:8565]	-0.419658	7.30919	-2.18922	0.0503778	0.99919	-4.17306
ENSG00000185837	CECR5-AS1	CECR5 antisense RNA 1 [Source:HGNC Symbol;Acc:HGNC:1842]	0.582526	0.632376	2.18912	0.0503868	0.99919	-4.45202
ENSG00000197837	HIST4H4	histone cluster 4, H4 [Source:HGNC Symbol;Acc:HGNC:20510]	0.740683	-0.328208	2.18842	0.0504487	0.99919	-4.49811
ENSG00000171303	KCNK3	potassium two pore domain channel subfamily K member 3 [Source:HGNC Symbol;Acc:HGNC:6278]	0.995047	-0.791117	2.18786	0.0504983	0.99919	-4.51386
ENSG00000150764	DIXDC1	DIX domain containing 1 [Source:HGNC Symbol;Acc:HGNC:23695]	0.313519	3.65526	2.18777	0.0505064	0.99919	-4.25041
ENSG00000109670	FBXW7	F-box and WD repeat domain containing 7 [Source:HGNC Symbol;Acc:HGNC:16712]	-0.337892	5.73703	-2.18775	0.0505082	0.99919	-4.18021
ENSG00000051108	HERPUD1	homocysteine inducible ER protein with ubiquitin like domain 1 [Source:HGNC Symbol;Acc:HGNC:13744]	0.329568	5.44023	2.18756	0.0505252	0.99919	-4.18214
ENSG00000160201	U2AF1	U2 small nuclear RNA auxiliary factor 1 [Source:HGNC Symbol;Acc:HGNC:12453]	0.499541	2.0397	2.18374	0.0508662	0.99919	-4.35767
ENSG00000274290	HIST1H2BE	histone cluster 1, H2be [Source:HGNC Symbol;Acc:HGNC:4753]	0.743139	0.454894	2.18325	0.0509101	0.99919	-4.45987
ENSG00000100028	SNRPD3	small nuclear ribonucleoprotein D3 polypeptide [Source:HGNC Symbol;Acc:HGNC:11160]	-0.361033	8.11074	-2.18307	0.0509264	0.99919	-4.1814
ENSG00000204516	MICB	MHC class I polypeptide-related sequence B [Source:HGNC Symbol;Acc:HGNC:7091]	-0.440284	1.88194	-2.18209	0.0510144	0.99919	-4.3871
ENSG00000188322	SBK1	SH3 domain binding kinase 1 [Source:HGNC Symbol;Acc:HGNC:17699]	-0.460776	2.70493	-2.1802	0.0511845	0.99919	-4.32963
ENSG00000274825	NA	NA	0.505272	1.37822	2.17982	0.051218	0.99919	-4.40491
ENSG00000271882	NA	NA	0.697869	-0.122994	2.17922	0.0512727	0.99919	-4.4909
ENSG00000132321	IQCA1	IQ motif containing with AAA domain 1 [Source:HGNC Symbol;Acc:HGNC:26195]	0.515627	2.6199	2.17805	0.0513777	0.99919	-4.31681
ENSG00000170892	TSEN34	tRNA splicing endonuclease subunit 34 [Source:HGNC Symbol;Acc:HGNC:15506]	-0.271008	7.74353	-2.17674	0.0514967	0.99919	-4.18113
ENSG00000171385	KCND3	potassium voltage-gated channel subfamily D member 3 [Source:HGNC Symbol;Acc:HGNC:6239]	0.652464	1.55879	2.17534	0.0516232	0.99919	-4.39133
ENSG00000099860	GADD45B	growth arrest and DNA damage inducible beta [Source:HGNC Symbol;Acc:HGNC:4096]	0.287714	5.09655	2.17464	0.0516871	0.99919	-4.1952
ENSG00000226314	ZNF192P1	zinc finger protein 192 pseudogene 1 [Source:HGNC Symbol;Acc:HGNC:18777]	-0.964246	-0.439699	-2.17404	0.051742	0.99919	-4.51784
ENSG00000173621	LRFN4	leucine rich repeat and fibronectin type III domain containing 4 [Source:HGNC Symbol;Acc:HGNC:28456]	0.59943	4.5853	2.1724	0.0518908	0.99919	-4.21006
ENSG00000266338	NBPF15	neuroblastoma breakpoint family member 15 [Source:HGNC Symbol;Acc:HGNC:28791]	-0.872626	-0.555647	-2.17008	0.0521032	0.99919	-4.52025
ENSG00000166881	NEMP1	nuclear envelope integral membrane protein 1 [Source:HGNC Symbol;Acc:HGNC:29001]	-0.361724	4.41698	-2.17002	0.0521084	0.99919	-4.227
ENSG00000162645	GBP2	guanylate binding protein 2 [Source:HGNC Symbol;Acc:HGNC:4183]	0.520634	3.03849	2.16969	0.0521386	0.99919	-4.29103
ENSG00000005238	FAM214B	family with sequence similarity 214 member B [Source:HGNC Symbol;Acc:HGNC:25666]	-0.450857	3.86568	-2.16898	0.052204	0.99919	-4.25682
ENSG00000130305	NSUN5	NOP2/Sun RNA methyltransferase family member 5 [Source:HGNC Symbol;Acc:HGNC:16385]	-0.314011	6.33352	-2.16873	0.0522266	0.99919	-4.18125
ENSG00000157216	SSBP3	single stranded DNA binding protein 3 [Source:HGNC Symbol;Acc:HGNC:15674]	-0.337054	5.95024	-2.16776	0.052316	0.99919	-4.1853
ENSG00000175471	MCTP1	multiple C2 and transmembrane domain containing 1 [Source:HGNC Symbol;Acc:HGNC:26183]	0.53832	2.02417	2.16702	0.052384	0.99919	-4.36136
ENSG00000134283	PPHLN1	periphilin 1 [Source:HGNC Symbol;Acc:HGNC:19369]	-0.40669	5.85553	-2.16609	0.0524701	0.99919	-4.18766
ENSG00000145014	TMEM44	transmembrane protein 44 [Source:HGNC Symbol;Acc:HGNC:25120]	-0.426503	3.66	-2.16592	0.0524851	0.99919	-4.26751
ENSG00000181264	TMEM136	transmembrane protein 136 [Source:HGNC Symbol;Acc:HGNC:28280]	0.451328	3.44133	2.1653	0.0525431	0.99919	-4.26812
ENSG00000107738	VSIR	chromosome 10 open reading frame 54 [Source:HGNC Symbol;Acc:HGNC:30085]	0.535397	1.22537	2.16516	0.0525554	0.99919	-4.41737
ENSG00000155744	FAM126B	family with sequence similarity 126 member B [Source:HGNC Symbol;Acc:HGNC:28593]	-0.330992	6.38858	-2.16373	0.0526877	0.99919	-4.18309
ENSG00000172232	AZU1	azurocidin 1 [Source:HGNC Symbol;Acc:HGNC:913]	-0.897488	0.0236197	-2.16366	0.052694	0.99919	-4.50247
ENSG00000114956	DGUOK	deoxyguanosine kinase [Source:HGNC Symbol;Acc:HGNC:2858]	-0.310888	6.04308	-2.16352	0.0527074	0.99919	-4.18586
ENSG00000154146	NRGN	neurogranin [Source:HGNC Symbol;Acc:HGNC:8000]	-0.500197	3.78696	-2.16321	0.0527362	0.99919	-4.26419
ENSG00000185000	DGAT1	diacylglycerol O-acyltransferase 1 [Source:HGNC Symbol;Acc:HGNC:2843]	0.502327	4.28016	2.1623	0.0528204	0.99919	-4.22647
ENSG00000222020	NA	NA	0.46739	2.93503	2.16225	0.052825	0.99919	-4.30015
ENSG00000078902	TOLLIP	toll interacting protein [Source:HGNC Symbol;Acc:HGNC:16476]	0.275077	5.427	2.16152	0.0528923	0.99919	-4.19315
ENSG00000185453	C19orf68	chromosome 19 open reading frame 68 [Source:HGNC Symbol;Acc:HGNC:34495]	-0.777433	4.04053	-2.1608	0.0529598	0.99919	-4.25467
ENSG00000143013	LMO4	LIM domain only 4 [Source:HGNC Symbol;Acc:HGNC:6644]	0.501683	0.634787	2.16077	0.0529623	0.99919	-4.45559
ENSG00000130222	GADD45G	growth arrest and DNA damage inducible gamma [Source:HGNC Symbol;Acc:HGNC:4097]	0.750069	3.75013	2.16045	0.0529923	0.99919	-4.25044
ENSG00000130299	GTPBP3	GTP binding protein 3 (mitochondrial) [Source:HGNC Symbol;Acc:HGNC:14880]	-0.35013	5.49539	-2.15995	0.053039	0.99919	-4.19597
ENSG00000273492	NA	NA	1.03693	-0.254906	2.15993	0.0530407	0.99919	-4.49532
ENSG00000242125	SNHG3	small nucleolar RNA host gene 3 [Source:HGNC Symbol;Acc:HGNC:10118]	-0.336485	7.79468	-2.15946	0.0530849	0.99919	-4.18852
ENSG00000135116	HRK	harakiri, BCL2 interacting protein [Source:HGNC Symbol;Acc:HGNC:5185]	-0.608097	1.02519	-2.15818	0.0532035	0.99919	-4.45046
ENSG00000162772	ATF3	activating transcription factor 3 [Source:HGNC Symbol;Acc:HGNC:785]	0.636431	0.835773	2.157	0.0533139	0.99919	-4.44312
ENSG00000100055	CYTH4	cytohesin 4 [Source:HGNC Symbol;Acc:HGNC:9505]	-1.15295	-0.830182	-2.15581	0.0534259	0.99919	-4.53292
ENSG00000279491	NA	NA	0.536695	1.10543	2.15548	0.0534562	0.99919	-4.42786
ENSG00000160255	ITGB2	integrin subunit beta 2 [Source:HGNC Symbol;Acc:HGNC:6155]	0.796134	0.84881	2.15533	0.0534705	0.99919	-4.43967
ENSG00000182612	TSPAN10	tetraspanin 10 [Source:HGNC Symbol;Acc:HGNC:29942]	0.612603	1.22781	2.15304	0.053686	0.99919	-4.41972
ENSG00000037474	NSUN2	NOP2/Sun RNA methyltransferase family member 2 [Source:HGNC Symbol;Acc:HGNC:25994]	-0.305372	7.85422	-2.15235	0.0537507	0.99919	-4.19193
ENSG00000146067	FAM193B	family with sequence similarity 193 member B [Source:HGNC Symbol;Acc:HGNC:25524]	-0.575369	3.08933	-2.15233	0.0537534	0.99919	-4.3118
ENSG00000247982	LINC00926	long intergenic non-protein coding RNA 926 [Source:HGNC Symbol;Acc:HGNC:27514]	-0.475192	2.02262	-2.1519	0.0537934	0.99919	-4.38526
ENSG00000270761	NA	NA	0.431657	2.13434	2.15153	0.0538285	0.99919	-4.35872
ENSG00000163104	SMARCAD1	SWI/SNF-related, matrix-associated actin-dependent regulator of chromatin, subfamily a, containing DEAD/H box 1 [Source:HGNC Symbol;Acc:HGNC:18398]	-0.383804	4.38158	-2.14776	0.0541853	0.99919	-4.23696
ENSG00000145349	CAMK2D	calcium/calmodulin dependent protein kinase II delta [Source:HGNC Symbol;Acc:HGNC:1462]	0.598661	1.63662	2.14735	0.0542247	0.99919	-4.39213
ENSG00000106976	DNM1	dynamin 1 [Source:HGNC Symbol;Acc:HGNC:2972]	-0.698665	2.66506	-2.14659	0.054297	0.99919	-4.34561
ENSG00000196781	TLE1	transducin like enhancer of split 1 [Source:HGNC Symbol;Acc:HGNC:11837]	-0.287021	5.11825	-2.14647	0.0543086	0.99919	-4.20976
ENSG00000146109	ABT1	activator of basal transcription 1 [Source:HGNC Symbol;Acc:HGNC:17369]	-0.449362	6.4539	-2.1459	0.0543632	0.99919	-4.19053
ENSG00000170260	ZNF212	zinc finger protein 212 [Source:HGNC Symbol;Acc:HGNC:13004]	-0.475201	4.87105	-2.14509	0.0544402	0.99919	-4.21985
ENSG00000261971	MMP25-AS1	MMP25 antisense RNA 1 [Source:HGNC Symbol;Acc:HGNC:51372]	-0.411664	2.11421	-2.14489	0.0544593	0.99919	-4.37736
ENSG00000099250	NRP1	neuropilin 1 [Source:HGNC Symbol;Acc:HGNC:8004]	0.555642	3.14567	2.14404	0.05454	0.99919	-4.291
ENSG00000177169	ULK1	unc-51 like autophagy activating kinase 1 [Source:HGNC Symbol;Acc:HGNC:12558]	-0.314605	6.47034	-2.14303	0.054637	0.99919	-4.19128
ENSG00000159733	ZFYVE28	zinc finger FYVE-type containing 28 [Source:HGNC Symbol;Acc:HGNC:29334]	-0.341657	3.92997	-2.14301	0.0546389	0.99919	-4.25999
ENSG00000182606	TRAK1	trafficking kinesin protein 1 [Source:HGNC Symbol;Acc:HGNC:29947]	0.257913	5.16454	2.14237	0.0547005	0.99919	-4.20644
ENSG00000146648	EGFR	epidermal growth factor receptor [Source:HGNC Symbol;Acc:HGNC:3236]	0.380582	6.47522	2.14214	0.0547221	0.99919	-4.19104
ENSG00000125740	FOSB	FosB proto-oncogene, AP-1 transcription factor subunit [Source:HGNC Symbol;Acc:HGNC:3797]	-0.702179	1.27551	-2.14167	0.0547672	0.99919	-4.44068
ENSG00000198771	RCSD1	RCSD domain containing 1 [Source:HGNC Symbol;Acc:HGNC:28310]	0.519336	3.41459	2.14047	0.0548824	0.99919	-4.27687
ENSG00000231154	MORF4L2-AS1	MORF4L2 antisense RNA 1 [Source:HGNC Symbol;Acc:HGNC:27991]	0.74325	-0.658216	2.13914	0.055011	0.99919	-4.51396
ENSG00000219747	NA	NA	0.522354	1.91638	2.13881	0.0550426	0.99919	-4.37567
ENSG00000158828	PINK1	PTEN induced putative kinase 1 [Source:HGNC Symbol;Acc:HGNC:14581]	0.339982	6.50284	2.13858	0.0550645	0.99919	-4.19246
ENSG00000243742	RPLP0P2	ribosomal protein lateral stalk subunit P0 pseudogene 2 [Source:HGNC Symbol;Acc:HGNC:17960]	0.712292	0.173881	2.13856	0.0550664	0.99919	-4.48225
ENSG00000099194	SCD	stearoyl-CoA desaturase [Source:HGNC Symbol;Acc:HGNC:10571]	0.281323	8.84545	2.13326	0.0555806	0.99919	-4.21003
ENSG00000134419	RPS15A	ribosomal protein S15a [Source:HGNC Symbol;Acc:HGNC:10389]	0.449723	8.5455	2.1329	0.055616	0.99919	-4.20767
ENSG00000142686	C1orf216	chromosome 1 open reading frame 216 [Source:HGNC Symbol;Acc:HGNC:26800]	-0.483706	5.04476	-2.13173	0.05573	0.99919	-4.21965
ENSG00000100364	KIAA0930	KIAA0930 [Source:HGNC Symbol;Acc:HGNC:1314]	-0.291567	5.62623	-2.13168	0.0557347	0.99919	-4.20447
ENSG00000107789	MINPP1	multiple inositol-polyphosphate phosphatase 1 [Source:HGNC Symbol;Acc:HGNC:7102]	-0.460596	4.54653	-2.13161	0.0557415	0.99919	-4.23712
ENSG00000154262	ABCA6	ATP binding cassette subfamily A member 6 [Source:HGNC Symbol;Acc:HGNC:36]	0.503465	2.34006	2.1285	0.056046	0.99919	-4.3483
ENSG00000159915	ZNF233	zinc finger protein 233 [Source:HGNC Symbol;Acc:HGNC:30946]	0.740918	0.0378498	2.12831	0.0560644	0.99919	-4.48726
ENSG00000239917	RPS10P16	ribosomal protein S10 pseudogene 16 [Source:HGNC Symbol;Acc:HGNC:36200]	0.826328	-0.774363	2.12712	0.0561811	0.99919	-4.51787
ENSG00000118997	DNAH7	dynein axonemal heavy chain 7 [Source:HGNC Symbol;Acc:HGNC:18661]	-0.528998	2.20524	-2.12708	0.0561859	0.99919	-4.37836
ENSG00000171766	GATM	glycine amidinotransferase [Source:HGNC Symbol;Acc:HGNC:4175]	0.697992	0.549918	2.12553	0.0563376	0.99919	-4.46398
ENSG00000186907	RTN4RL2	reticulon 4 receptor-like 2 [Source:HGNC Symbol;Acc:HGNC:23053]	-1.02522	0.0693601	-2.12509	0.0563817	0.99919	-4.50579
ENSG00000144476	ACKR3	atypical chemokine receptor 3 [Source:HGNC Symbol;Acc:HGNC:23692]	0.587111	0.799504	2.12412	0.0564771	0.99919	-4.45005
ENSG00000176383	B3GNT4	UDP-GlcNAc:betaGal beta-1,3-N-acetylglucosaminyltransferase 4 [Source:HGNC Symbol;Acc:HGNC:15683]	0.594666	1.32052	2.12397	0.0564922	0.99919	-4.41794
ENSG00000132357	CARD6	caspase recruitment domain family member 6 [Source:HGNC Symbol;Acc:HGNC:16394]	0.704817	1.29197	2.12248	0.0566392	0.99919	-4.41789
ENSG00000273416	NA	NA	0.644726	-0.172441	2.12195	0.0566917	0.99919	-4.49849
ENSG00000147437	GNRH1	gonadotropin releasing hormone 1 [Source:HGNC Symbol;Acc:HGNC:4419]	0.562302	2.44824	2.12113	0.056774	0.99919	-4.34284
ENSG00000196872	KIAA1211L	KIAA1211 like [Source:HGNC Symbol;Acc:HGNC:33454]	0.568573	1.69879	2.12073	0.0568134	0.99919	-4.39418
ENSG00000100228	RAB36	RAB36, member RAS oncogene family [Source:HGNC Symbol;Acc:HGNC:9775]	-0.429301	3.07507	-2.12059	0.0568271	0.99919	-4.31883
ENSG00000054148	PHPT1	phosphohistidine phosphatase 1 [Source:HGNC Symbol;Acc:HGNC:30033]	0.514699	4.92326	2.11872	0.0570133	0.99919	-4.22073
ENSG00000125447	GGA3	golgi associated, gamma adaptin ear containing, ARF binding protein 3 [Source:HGNC Symbol;Acc:HGNC:17079]	-0.286213	4.80951	-2.11867	0.0570183	0.99919	-4.23008
ENSG00000186815	TPCN1	two pore segment channel 1 [Source:HGNC Symbol;Acc:HGNC:18182]	-0.319683	5.25599	-2.11465	0.0574209	0.99919	-4.21916
ENSG00000164741	DLC1	DLC1 Rho GTPase activating protein [Source:HGNC Symbol;Acc:HGNC:2897]	-0.7451	1.28192	-2.11386	0.0574997	0.99919	-4.44271
ENSG00000119986	AVPI1	arginine vasopressin induced 1 [Source:HGNC Symbol;Acc:HGNC:30898]	0.531424	1.67559	2.11303	0.0575839	0.99919	-4.39852
ENSG00000163814	CDCP1	CUB domain containing protein 1 [Source:HGNC Symbol;Acc:HGNC:24357]	-0.266882	7.30411	-2.11252	0.0576345	0.99919	-4.20494
ENSG00000105327	BBC3	BCL2 binding component 3 [Source:HGNC Symbol;Acc:HGNC:17868]	-0.279256	6.05115	-2.1122	0.0576673	0.99919	-4.2068
ENSG00000198218	QRICH1	glutamine rich 1 [Source:HGNC Symbol;Acc:HGNC:24713]	-0.285619	4.49825	-2.11084	0.0578045	0.99919	-4.24433
ENSG00000100100	PIK3IP1	phosphoinositide-3-kinase interacting protein 1 [Source:HGNC Symbol;Acc:HGNC:24942]	0.50555	3.42586	2.11041	0.0578479	0.99919	-4.28587
ENSG00000008311	AASS	aminoadipate-semialdehyde synthase [Source:HGNC Symbol;Acc:HGNC:17366]	0.737075	0.995343	2.11033	0.0578556	0.99919	-4.43915
ENSG00000178229	ZNF543	zinc finger protein 543 [Source:HGNC Symbol;Acc:HGNC:25281]	-0.651048	1.08257	-2.11031	0.0578579	0.99919	-4.4545
ENSG00000146592	CREB5	cAMP responsive element binding protein 5 [Source:HGNC Symbol;Acc:HGNC:16844]	0.496655	5.22386	2.11025	0.0578645	0.99919	-4.21708
ENSG00000187997	C17orf99	chromosome 17 open reading frame 99 [Source:HGNC Symbol;Acc:HGNC:34490]	0.853272	0.333551	2.10978	0.0579115	0.99919	-4.47509
ENSG00000198435	NRARP	NOTCH-regulated ankyrin repeat protein [Source:HGNC Symbol;Acc:HGNC:33843]	-0.490159	1.98296	-2.10945	0.057945	0.99919	-4.39416
ENSG00000170619	COMMD5	COMM domain containing 5 [Source:HGNC Symbol;Acc:HGNC:17902]	-0.256404	5.24387	-2.10937	0.0579535	0.99919	-4.22091
ENSG00000272854	NA	NA	0.547256	0.625506	2.10907	0.057983	0.99919	-4.46257
ENSG00000253558	NA	NA	0.606079	1.18103	2.10899	0.0579912	0.99919	-4.43042
ENSG00000228399	NA	NA	0.739181	1.7509	2.10898	0.057993	0.99919	-4.39009
ENSG00000236200	KDM4A-AS1	KDM4A antisense RNA 1 [Source:HGNC Symbol;Acc:HGNC:40528]	0.380747	2.87075	2.10888	0.0580027	0.99919	-4.321
ENSG00000196576	PLXNB2	plexin B2 [Source:HGNC Symbol;Acc:HGNC:9104]	0.305416	5.99319	2.10872	0.0580194	0.99919	-4.20738
ENSG00000109519	GRPEL1	GrpE like 1, mitochondrial [Source:HGNC Symbol;Acc:HGNC:19696]	-0.311999	5.63328	-2.10827	0.0580642	0.99919	-4.21402
ENSG00000005156	LIG3	DNA ligase 3 [Source:HGNC Symbol;Acc:HGNC:6600]	-0.244184	6.25104	-2.10823	0.0580687	0.99919	-4.20668
ENSG00000247809	NR2F2-AS1	NR2F2 antisense RNA 1 [Source:HGNC Symbol;Acc:HGNC:44222]	0.548072	2.3038	2.1075	0.0581429	0.99919	-4.35631
ENSG00000253276	CCDC71L	coiled-coil domain containing 71-like [Source:HGNC Symbol;Acc:HGNC:26685]	-0.358398	4.89287	-2.1067	0.0582243	0.99919	-4.23245
ENSG00000213693	SEC14L1P1	SEC14 like 1 pseudogene 1 [Source:HGNC Symbol;Acc:HGNC:44189]	0.756863	-0.609606	2.10587	0.0583085	0.99919	-4.51459
ENSG00000112208	BAG2	BCL2 associated athanogene 2 [Source:HGNC Symbol;Acc:HGNC:938]	0.356965	3.72123	2.10498	0.0583992	0.99919	-4.27374
ENSG00000013374	NUB1	negative regulator of ubiquitin like proteins 1 [Source:HGNC Symbol;Acc:HGNC:17623]	-0.259384	7.01282	-2.1045	0.0584484	0.99919	-4.20713
ENSG00000277879	NA	NA	0.435642	1.19899	2.10275	0.058627	0.99919	-4.43076
ENSG00000101444	AHCY	adenosylhomocysteinase [Source:HGNC Symbol;Acc:HGNC:343]	0.294541	8.09408	2.1024	0.0586629	0.99919	-4.21551
ENSG00000064932	SBNO2	strawberry notch homolog 2 [Source:HGNC Symbol;Acc:HGNC:29158]	-0.371763	5.31212	-2.10083	0.0588245	0.99919	-4.22376
ENSG00000142528	ZNF473	zinc finger protein 473 [Source:HGNC Symbol;Acc:HGNC:23239]	-0.298128	4.71438	-2.10071	0.0588363	0.99919	-4.24041
ENSG00000279425	NA	NA	0.63859	1.4172	2.10009	0.0589001	0.99919	-4.41584
ENSG00000124839	RAB17	RAB17, member RAS oncogene family [Source:HGNC Symbol;Acc:HGNC:16523]	0.593536	4.80433	2.09969	0.0589418	0.99919	-4.23117
ENSG00000129654	FOXJ1	forkhead box J1 [Source:HGNC Symbol;Acc:HGNC:3816]	0.815613	-0.900824	2.09952	0.0589593	0.99919	-4.52379
ENSG00000182580	EPHB3	EPH receptor B3 [Source:HGNC Symbol;Acc:HGNC:3394]	0.431376	1.88922	2.09915	0.0589967	0.99919	-4.38707
ENSG00000184436	THAP7	THAP domain containing 7 [Source:HGNC Symbol;Acc:HGNC:23190]	0.409614	5.49466	2.09735	0.0591826	0.99919	-4.21761
ENSG00000111652	COPS7A	COP9 signalosome subunit 7A [Source:HGNC Symbol;Acc:HGNC:16758]	-0.299538	7.51654	-2.09725	0.0591924	0.99919	-4.21239
ENSG00000107537	PHYH	phytanoyl-CoA 2-hydroxylase [Source:HGNC Symbol;Acc:HGNC:8940]	0.291119	5.43007	2.09616	0.0593057	0.99919	-4.21949
ENSG00000114019	AMOTL2	angiomotin like 2 [Source:HGNC Symbol;Acc:HGNC:17812]	-0.360423	4.21611	-2.09554	0.0593695	0.99919	-4.26229
ENSG00000120832	MTERF2	mitochondrial transcription termination factor 2 [Source:HGNC Symbol;Acc:HGNC:30779]	0.423964	3.21824	2.09532	0.0593926	0.99919	-4.30401
ENSG00000153561	RMND5A	required for meiotic nuclear division 5 homolog A [Source:HGNC Symbol;Acc:HGNC:25850]	-0.467325	5.46181	-2.09362	0.0595694	0.99919	-4.224
ENSG00000173559	NABP1	nucleic acid binding protein 1 [Source:HGNC Symbol;Acc:HGNC:26232]	0.384666	3.95237	2.09262	0.0596727	0.99919	-4.26665
ENSG00000127666	TICAM1	toll like receptor adaptor molecule 1 [Source:HGNC Symbol;Acc:HGNC:18348]	-0.419269	4.71731	-2.09165	0.0597742	0.99919	-4.24469
ENSG00000133422	MORC2	MORC family CW-type zinc finger 2 [Source:HGNC Symbol;Acc:HGNC:23573]	-0.498526	5.37808	-2.09163	0.0597759	0.99919	-4.22697
ENSG00000167136	ENDOG	endonuclease G [Source:HGNC Symbol;Acc:HGNC:3346]	-0.451294	7.06143	-2.09079	0.0598637	0.99919	-4.21295
ENSG00000072195	SPEG	SPEG complex locus [Source:HGNC Symbol;Acc:HGNC:16901]	-0.379097	3.44538	-2.08983	0.059964	0.99919	-4.30436
ENSG00000123643	SLC36A1	solute carrier family 36 member 1 [Source:HGNC Symbol;Acc:HGNC:18761]	-0.440091	4.49137	-2.08902	0.060049	0.99919	-4.25451
ENSG00000263272	NA	NA	-0.527223	4.46978	-2.0879	0.060166	0.99919	-4.25781
ENSG00000198695	MT-ND6	mitochondrially encoded NADH:ubiquinone oxidoreductase core subunit 6 [Source:HGNC Symbol;Acc:HGNC:7462]	-0.660098	5.89804	-2.08722	0.060238	0.99919	-4.22065
ENSG00000138738	PRDM5	PR/SET domain 5 [Source:HGNC Symbol;Acc:HGNC:9349]	0.645182	-0.0633164	2.08715	0.0602452	0.99919	-4.49752
ENSG00000260057	LINC01571	long intergenic non-protein coding RNA 1571 [Source:HGNC Symbol;Acc:HGNC:51384]	-0.557161	2.10968	-2.08693	0.0602687	0.99919	-4.39265
ENSG00000061337	LZTS1	leucine zipper tumor suppressor 1 [Source:HGNC Symbol;Acc:HGNC:13861]	-0.635947	2.18434	-2.08659	0.0603039	0.99919	-4.38797
ENSG00000135972	MRPS9	mitochondrial ribosomal protein S9 [Source:HGNC Symbol;Acc:HGNC:14501]	-0.398473	7.14713	-2.08588	0.0603785	0.99919	-4.21526
ENSG00000250565	ATP6V1E2	ATPase H+ transporting V1 subunit E2 [Source:HGNC Symbol;Acc:HGNC:18125]	0.501892	2.22941	2.08569	0.0603989	0.99919	-4.36684
ENSG00000147010	SH3KBP1	SH3 domain containing kinase binding protein 1 [Source:HGNC Symbol;Acc:HGNC:13867]	0.312271	5.78525	2.08505	0.0604663	0.99919	-4.21906
ENSG00000198729	PPP1R14C	protein phosphatase 1 regulatory inhibitor subunit 14C [Source:HGNC Symbol;Acc:HGNC:14952]	0.7825	-0.556501	2.08493	0.0604788	0.99919	-4.51429
ENSG00000228847	ATP5G2P4	ATP synthase, H+ transporting, mitochondrial Fo complex subunit C2 (subunit 9) pseudogene 4 [Source:HGNC Symbol;Acc:HGNC:42188]	1.38211	-1.10746	2.08487	0.0604849	0.99919	-4.52773
ENSG00000110063	DCPS	decapping enzyme, scavenger [Source:HGNC Symbol;Acc:HGNC:29812]	-0.332366	5.42367	-2.08468	0.0605048	0.99919	-4.22745
ENSG00000161671	EMC10	ER membrane protein complex subunit 10 [Source:HGNC Symbol;Acc:HGNC:27609]	0.503587	3.7672	2.08344	0.0606357	0.99919	-4.27758
ENSG00000268403	NA	NA	0.3557	3.31724	2.08309	0.0606733	0.99919	-4.30226
ENSG00000043355	ZIC2	Zic family member 2 [Source:HGNC Symbol;Acc:HGNC:12873]	-0.399331	4.29972	-2.08303	0.0606797	0.99919	-4.26437
ENSG00000108771	DHX58	DEXH-box helicase 58 [Source:HGNC Symbol;Acc:HGNC:29517]	0.437104	3.07924	2.08297	0.0606861	0.99919	-4.31497
ENSG00000226950	DANCR	differentiation antagonizing non-protein coding RNA [Source:HGNC Symbol;Acc:HGNC:28964]	0.296767	4.8092	2.08295	0.0606874	0.99919	-4.23906
ENSG00000135046	ANXA1	annexin A1 [Source:HGNC Symbol;Acc:HGNC:533]	0.42082	8.24473	2.08226	0.0607608	0.99919	-4.22526
ENSG00000198931	APRT	adenine phosphoribosyltransferase [Source:HGNC Symbol;Acc:HGNC:626]	0.408495	6.61049	2.08201	0.0607878	0.99919	-4.21605
ENSG00000254759	NAP1L1P1	nucleosome assembly protein 1 like 1 pseudogene 1 [Source:HGNC Symbol;Acc:HGNC:38004]	1.06864	-1.08844	2.08141	0.0608508	0.99919	-4.52976
ENSG00000159640	ACE	angiotensin I converting enzyme [Source:HGNC Symbol;Acc:HGNC:2707]	-0.385315	3.03861	-2.08137	0.0608556	0.99919	-4.33061
ENSG00000247077	PGAM5	PGAM family member 5, mitochondrial serine/threonine protein phosphatase [Source:HGNC Symbol;Acc:HGNC:28763]	-0.26972	5.86096	-2.0783	0.0611814	0.99919	-4.22283
ENSG00000065183	WDR3	WD repeat domain 3 [Source:HGNC Symbol;Acc:HGNC:12755]	-0.257382	5.58828	-2.07746	0.0612716	0.99919	-4.22692
ENSG00000269609	RPARP-AS1	RPARP antisense RNA 1 [Source:HGNC Symbol;Acc:HGNC:45238]	0.270651	3.86339	2.07732	0.0612856	0.99919	-4.27731
ENSG00000051009	FAM160A2	family with sequence similarity 160 member A2 [Source:HGNC Symbol;Acc:HGNC:25378]	-0.272788	5.26553	-2.07643	0.0613807	0.99919	-4.23369
ENSG00000065809	FAM107B	family with sequence similarity 107 member B [Source:HGNC Symbol;Acc:HGNC:23726]	0.384842	5.75561	2.07572	0.0614573	0.99919	-4.22309
ENSG00000159239	C2orf81	chromosome 2 open reading frame 81 [Source:HGNC Symbol;Acc:HGNC:34350]	-0.446313	1.96724	-2.07562	0.0614677	0.99919	-4.40337
ENSG00000265148	TSPOAP1-AS1	TSPOAP1 antisense RNA 1 [Source:HGNC Symbol;Acc:HGNC:44148]	-1.03203	0.0441446	-2.07539	0.0614922	0.99919	-4.51519
ENSG00000119139	TJP2	tight junction protein 2 [Source:HGNC Symbol;Acc:HGNC:11828]	0.569154	-0.181702	2.07473	0.0615632	0.99919	-4.50402
ENSG00000272084	NA	NA	0.712455	0.243212	2.07423	0.0616164	0.99919	-4.48526
ENSG00000221823	PPP3R1	protein phosphatase 3 regulatory subunit B, alpha [Source:HGNC Symbol;Acc:HGNC:9317]	-0.302975	6.58569	-2.07229	0.0618256	0.99919	-4.2204
ENSG00000272622	NA	NA	-0.428485	1.62931	-2.06623	0.0624808	0.99919	-4.42504
ENSG00000236305	NA	NA	0.464632	1.56062	2.06565	0.0625442	0.99919	-4.41522
ENSG00000169813	HNRNPF	heterogeneous nuclear ribonucleoprotein F [Source:HGNC Symbol;Acc:HGNC:5039]	-0.342566	8.04599	-2.06279	0.0628562	0.99919	-4.23003
ENSG00000276505	NA	NA	-0.682516	0.078737	-2.06188	0.0629549	0.99919	-4.50669
ENSG00000172331	BPGM	bisphosphoglycerate mutase [Source:HGNC Symbol;Acc:HGNC:1093]	-0.442882	3.54648	-2.06178	0.0629663	0.99919	-4.30888
ENSG00000155229	MMS19	MMS19 homolog, cytosolic iron-sulfur assembly component [Source:HGNC Symbol;Acc:HGNC:13824]	-0.384177	9.07172	-2.06157	0.0629889	0.99919	-4.23914
ENSG00000283390	NA	NA	1.01704	-1.28779	2.06135	0.063014	0.99919	-4.53576
ENSG00000153310	FAM49B	family with sequence similarity 49 member B [Source:HGNC Symbol;Acc:HGNC:25216]	-0.260151	7.72867	-2.06115	0.0630357	0.99919	-4.2286
ENSG00000256806	NA	NA	-0.507704	1.03954	-2.06034	0.0631242	0.99919	-4.45982
ENSG00000133315	MACROD1	MACRO domain containing 1 [Source:HGNC Symbol;Acc:HGNC:29598]	0.420325	2.79298	2.05983	0.0631806	0.99919	-4.33867
ENSG00000138642	HERC6	HECT and RLD domain containing E3 ubiquitin protein ligase family member 6 [Source:HGNC Symbol;Acc:HGNC:26072]	0.662039	1.18137	2.05974	0.0631896	0.99919	-4.43682
ENSG00000143369	ECM1	extracellular matrix protein 1 [Source:HGNC Symbol;Acc:HGNC:3153]	0.429933	2.43773	2.05932	0.0632364	0.99919	-4.35989
ENSG00000164111	ANXA5	annexin A5 [Source:HGNC Symbol;Acc:HGNC:543]	0.295268	5.03301	2.05915	0.0632553	0.99919	-4.24242
ENSG00000204860	FAM201A	family with sequence similarity 201 member A [Source:HGNC Symbol;Acc:HGNC:27239]	0.5186	1.62179	2.05798	0.063384	0.99919	-4.41101
ENSG00000213347	MXD3	MAX dimerization protein 3 [Source:HGNC Symbol;Acc:HGNC:14008]	0.491708	3.56431	2.05743	0.0634447	0.99919	-4.2961
ENSG00000166796	LDHC	lactate dehydrogenase C [Source:HGNC Symbol;Acc:HGNC:6544]	0.496556	2.06587	2.05682	0.0635114	0.99919	-4.3841
ENSG00000120093	HOXB3	homeobox B3 [Source:HGNC Symbol;Acc:HGNC:5114]	-0.331345	3.50479	-2.05612	0.0635892	0.99919	-4.31047
ENSG00000163820	FYCO1	FYVE and coiled-coil domain containing 1 [Source:HGNC Symbol;Acc:HGNC:14673]	-0.292625	3.77024	-2.05575	0.0636299	0.99919	-4.29622
ENSG00000184083	FAM120C	family with sequence similarity 120C [Source:HGNC Symbol;Acc:HGNC:16949]	-0.265921	4.52011	-2.05568	0.0636373	0.99919	-4.26371
ENSG00000276293	PIP4K2B	phosphatidylinositol-5-phosphate 4-kinase type 2 beta [Source:HGNC Symbol;Acc:HGNC:8998]	-0.256507	5.19089	-2.05519	0.0636923	0.99919	-4.24357
ENSG00000067113	PLPP1	phospholipid phosphatase 1 [Source:HGNC Symbol;Acc:HGNC:9228]	0.273523	4.40401	2.05483	0.0637322	0.99919	-4.26295
ENSG00000185504	FAAP100	Fanconi anemia core complex associated protein 100 [Source:HGNC Symbol;Acc:HGNC:26171]	-0.513802	5.31186	-2.05472	0.0637442	0.99919	-4.24328
ENSG00000178715	NA	NA	0.886806	-0.636175	2.05438	0.063782	0.99919	-4.51881
ENSG00000155380	SLC16A1	solute carrier family 16 member 1 [Source:HGNC Symbol;Acc:HGNC:10922]	0.254164	7.426	2.05428	0.0637923	0.99919	-4.23026
ENSG00000213722	DDAH2	dimethylarginine dimethylaminohydrolase 2 [Source:HGNC Symbol;Acc:HGNC:2716]	-0.44859	6.94979	-2.05396	0.063828	0.99919	-4.22809
ENSG00000173451	THAP2	THAP domain containing 2 [Source:HGNC Symbol;Acc:HGNC:20854]	0.498147	0.576793	2.05326	0.0639063	0.99919	-4.47354
ENSG00000136383	ALPK3	alpha kinase 3 [Source:HGNC Symbol;Acc:HGNC:17574]	0.541212	1.93963	2.05305	0.0639291	0.99919	-4.39171
ENSG00000228526	MIR34AHG	microRNA 34a [Source:HGNC Symbol;Acc:HGNC:31635]	0.722278	0.429266	2.05281	0.0639555	0.99919	-4.47738
ENSG00000277258	PCGF2	polycomb group ring finger 2 [Source:HGNC Symbol;Acc:HGNC:12929]	-0.264455	6.8027	-2.05247	0.0639934	0.99919	-4.22844
ENSG00000106479	ZNF862	zinc finger protein 862 [Source:HGNC Symbol;Acc:HGNC:34519]	0.393292	4.16979	2.05122	0.0641331	0.99919	-4.27215
ENSG00000057757	PITHD1	PITH domain containing 1 [Source:HGNC Symbol;Acc:HGNC:25022]	-0.257248	4.44998	-2.05099	0.0641582	0.99919	-4.2679
ENSG00000057704	TMCC3	transmembrane and coiled-coil domain family 3 [Source:HGNC Symbol;Acc:HGNC:29199]	0.478781	2.55564	2.0492	0.0643582	0.99919	-4.35482
ENSG00000146476	ARMT1	acidic residue methyltransferase 1 [Source:HGNC Symbol;Acc:HGNC:17872]	0.402063	2.39487	2.04778	0.0645167	0.99919	-4.36621
ENSG00000065911	MTHFD2	methylenetetrahydrofolate dehydrogenase (NADP+ dependent) 2, methenyltetrahydrofolate cyclohydrolase [Source:HGNC Symbol;Acc:HGNC:7434]	-0.350155	6.73187	-2.04716	0.0645868	0.99919	-4.23075
ENSG00000205809	KLRC2	killer cell lectin like receptor C2 [Source:HGNC Symbol;Acc:HGNC:6375]	0.629129	1.50928	2.0452	0.0648061	0.99919	-4.41945
ENSG00000145949	MYLK4	myosin light chain kinase family member 4 [Source:HGNC Symbol;Acc:HGNC:27972]	-0.556737	0.37692	-2.04474	0.0648587	0.99919	-4.49531
ENSG00000237649	KIFC1	kinesin family member C1 [Source:HGNC Symbol;Acc:HGNC:6389]	-0.362329	7.09913	-2.04454	0.0648806	0.99919	-4.23228
ENSG00000159055	MIS18A	MIS18 kinetochore protein A [Source:HGNC Symbol;Acc:HGNC:1286]	-0.560253	6.0652	-2.04381	0.0649633	0.99919	-4.23602
ENSG00000179627	ZBTB42	zinc finger and BTB domain containing 42 [Source:HGNC Symbol;Acc:HGNC:32550]	-0.707912	1.71838	-2.04247	0.0651144	0.99919	-4.42579
ENSG00000214485	RPL7P1	ribosomal protein L7 pseudogene 1 [Source:HGNC Symbol;Acc:HGNC:10367]	0.448078	2.42765	2.04238	0.0651244	0.99919	-4.36497
ENSG00000280010	NA	NA	0.516973	1.1319	2.04227	0.065137	0.99919	-4.4451
ENSG00000174456	C12orf76	chromosome 12 open reading frame 76 [Source:HGNC Symbol;Acc:HGNC:33790]	0.328017	3.39686	2.04139	0.0652365	0.99919	-4.31143
ENSG00000260911	NA	NA	0.574395	0.862604	2.04014	0.0653781	0.99919	-4.45905
ENSG00000185215	TNFAIP2	TNF alpha induced protein 2 [Source:HGNC Symbol;Acc:HGNC:11895]	0.444937	8.57194	2.03979	0.0654178	0.99919	-4.24525
ENSG00000170604	IRF2BP1	interferon regulatory factor 2 binding protein 1 [Source:HGNC Symbol;Acc:HGNC:21728]	-0.713665	-0.483739	-2.03943	0.0654586	0.99919	-4.52721
ENSG00000188760	TMEM198	transmembrane protein 198 [Source:HGNC Symbol;Acc:HGNC:33704]	-0.496305	0.780097	-2.03917	0.0654886	0.99919	-4.47684
ENSG00000138744	NAAA	N-acylethanolamine acid amidase [Source:HGNC Symbol;Acc:HGNC:736]	0.313042	3.38861	2.03847	0.0655679	0.99919	-4.31298
ENSG00000144791	LIMD1	LIM domains containing 1 [Source:HGNC Symbol;Acc:HGNC:6612]	0.335982	4.67127	2.03837	0.0655797	0.99919	-4.26
ENSG00000053254	FOXN3	forkhead box N3 [Source:HGNC Symbol;Acc:HGNC:1928]	0.245342	5.99815	2.03733	0.0656979	0.99919	-4.23692
ENSG00000151332	MBIP	MAP3K12 binding inhibitory protein 1 [Source:HGNC Symbol;Acc:HGNC:20427]	0.484957	1.70383	2.03631	0.0658142	0.99919	-4.41043
ENSG00000239213	NCK1-AS1	NCK1 antisense RNA 1 (head to head) [Source:HGNC Symbol;Acc:HGNC:49645]	0.451112	2.19792	2.03627	0.0658191	0.99919	-4.38065
ENSG00000179967	PPP1R14BP3	protein phosphatase 1 regulatory inhibitor subunit 14B pseudogene 3 [Source:HGNC Symbol;Acc:HGNC:16330]	0.693327	0.559871	2.03556	0.0658997	0.99919	-4.47451
ENSG00000260924	LINC01311	long intergenic non-protein coding RNA 1311 [Source:HGNC Symbol;Acc:HGNC:50503]	-0.439035	1.73399	-2.03537	0.0659213	0.99919	-4.42375
ENSG00000214253	FIS1	fission, mitochondrial 1 [Source:HGNC Symbol;Acc:HGNC:21689]	0.326793	4.8638	2.03491	0.0659734	0.99919	-4.25596
ENSG00000171940	ZNF217	zinc finger protein 217 [Source:HGNC Symbol;Acc:HGNC:13009]	-0.370872	5.98669	-2.03446	0.0660248	0.99919	-4.23978
ENSG00000130164	LDLR	low density lipoprotein receptor [Source:HGNC Symbol;Acc:HGNC:6547]	-0.384139	6.15502	-2.03256	0.0662427	0.99919	-4.2391
ENSG00000164406	LEAP2	liver enriched antimicrobial peptide 2 [Source:HGNC Symbol;Acc:HGNC:29571]	0.615434	-0.544004	2.03188	0.0663216	0.99919	-4.51976
ENSG00000108352	RAPGEFL1	Rap guanine nucleotide exchange factor like 1 [Source:HGNC Symbol;Acc:HGNC:17428]	-0.443573	2.22141	-2.03099	0.0664236	0.99919	-4.39669
ENSG00000145414	NAF1	nuclear assembly factor 1 ribonucleoprotein [Source:HGNC Symbol;Acc:HGNC:25126]	-0.398522	2.9975	-2.03074	0.0664529	0.99919	-4.34816
ENSG00000272444	NA	NA	0.392618	3.00558	2.03022	0.0665126	0.99919	-4.33496
ENSG00000235916	NA	NA	0.867318	-0.961668	2.02897	0.0666571	0.99919	-4.53113
ENSG00000121858	TNFSF10	tumor necrosis factor superfamily member 10 [Source:HGNC Symbol;Acc:HGNC:11925]	0.647972	1.81565	2.02879	0.066677	0.99919	-4.40364
ENSG00000126945	HNRNPH2	heterogeneous nuclear ribonucleoprotein H2 (H') [Source:HGNC Symbol;Acc:HGNC:5042]	-0.309586	7.07828	-2.02689	0.0668979	0.99919	-4.23956
ENSG00000136603	SKIL	SKI-like proto-oncogene [Source:HGNC Symbol;Acc:HGNC:10897]	-0.321134	3.38782	-2.02587	0.0670155	0.99919	-4.32532
ENSG00000237976	NA	NA	-0.562655	0.694071	-2.02388	0.0672473	0.99919	-4.48313
ENSG00000144579	CTDSP1	CTD small phosphatase 1 [Source:HGNC Symbol;Acc:HGNC:21614]	-0.265745	7.22967	-2.02343	0.0672992	0.99919	-4.24154
ENSG00000229715	EEF1DP3	eukaryotic translation elongation factor 1 delta pseudogene 3 [Source:HGNC Symbol;Acc:HGNC:30486]	-1.1791	-0.661517	-2.02227	0.0674343	0.99919	-4.53599
ENSG00000073282	TP63	tumor protein p63 [Source:HGNC Symbol;Acc:HGNC:15979]	-0.403754	5.58297	-2.02094	0.0675902	0.99919	-4.25074
ENSG00000203685	STUM	stum, mechanosensory transduction mediator homolog [Source:HGNC Symbol;Acc:HGNC:30491]	0.536263	1.00616	2.0205	0.0676418	0.99919	-4.45548
ENSG00000164611	PTTG1	pituitary tumor-transforming 1 [Source:HGNC Symbol;Acc:HGNC:9690]	-0.335662	7.55115	-2.01929	0.0677833	0.99919	-4.24474
ENSG00000065618	COL17A1	collagen type XVII alpha 1 chain [Source:HGNC Symbol;Acc:HGNC:2194]	0.345938	6.02953	2.01809	0.0679238	0.99919	-4.24454
ENSG00000163659	TIPARP	TCDD inducible poly(ADP-ribose) polymerase [Source:HGNC Symbol;Acc:HGNC:23696]	0.635194	1.68406	2.01772	0.0679682	0.99919	-4.41376
ENSG00000179776	CDH5	cadherin 5 [Source:HGNC Symbol;Acc:HGNC:1764]	0.980003	-0.145044	2.01762	0.06798	0.99919	-4.50552
ENSG00000242071	RPL7AP6	ribosomal protein L7a pseudogene 6 [Source:HGNC Symbol;Acc:HGNC:19785]	0.346623	3.61234	2.01736	0.0680106	0.99919	-4.30854
ENSG00000152689	RASGRP3	RAS guanyl releasing protein 3 [Source:HGNC Symbol;Acc:HGNC:14545]	0.746748	-0.85593	2.01326	0.0684943	0.99919	-4.52935
ENSG00000187961	KLHL17	kelch like family member 17 [Source:HGNC Symbol;Acc:HGNC:24023]	-0.298719	3.89776	-2.0128	0.0685483	0.99919	-4.30432
ENSG00000170271	FAXDC2	fatty acid hydroxylase domain containing 2 [Source:HGNC Symbol;Acc:HGNC:1334]	0.363099	2.3539	2.01242	0.0685942	0.99919	-4.37801
ENSG00000135083	CCNJL	cyclin J like [Source:HGNC Symbol;Acc:HGNC:25876]	-0.392283	2.08724	-2.01085	0.06878	0.99919	-4.40729
ENSG00000121957	GPSM2	G-protein signaling modulator 2 [Source:HGNC Symbol;Acc:HGNC:29501]	0.419597	7.94242	2.00848	0.0690627	0.99919	-4.25282
ENSG00000161921	CXCL16	C-X-C motif chemokine ligand 16 [Source:HGNC Symbol;Acc:HGNC:16642]	-0.275574	3.83606	-2.00836	0.0690766	0.99919	-4.30856
ENSG00000030110	BAK1	BCL2 antagonist/killer 1 [Source:HGNC Symbol;Acc:HGNC:949]	-0.688475	3.81932	-2.0083	0.0690847	0.99919	-4.31613
ENSG00000178026	LRRC75B	leucine rich repeat containing 75B [Source:HGNC Symbol;Acc:HGNC:33155]	0.320063	2.59737	2.0075	0.0691802	0.99919	-4.36597
ENSG00000274460	NA	NA	0.448385	1.19574	2.00699	0.0692413	0.99919	-4.44667
ENSG00000243199	NA	NA	0.620287	-0.0741388	2.00663	0.0692835	0.99919	-4.5064
ENSG00000143797	MBOAT2	membrane bound O-acyltransferase domain containing 2 [Source:HGNC Symbol;Acc:HGNC:25193]	-0.373857	5.99512	-2.00632	0.069321	0.99919	-4.25131
ENSG00000196263	ZNF471	zinc finger protein 471 [Source:HGNC Symbol;Acc:HGNC:23226]	0.597414	0.774776	2.00559	0.0694092	0.99919	-4.46832
ENSG00000279117	NA	NA	0.519953	5.02207	2.00489	0.0694926	0.99919	-4.26323
ENSG00000224999	VTA1P1	vesicle (multivesicular body) trafficking 1 pseudogene 1 [Source:HGNC Symbol;Acc:HGNC:50483]	0.696595	-0.522787	2.00316	0.0697002	0.99919	-4.52054
ENSG00000112624	GLTSCR1L	GLTSCR1 like [Source:HGNC Symbol;Acc:HGNC:21111]	-0.283773	4.62249	-2.00316	0.069701	0.99919	-4.27964
ENSG00000175832	ETV4	ETS variant 4 [Source:HGNC Symbol;Acc:HGNC:3493]	-0.548758	2.36535	-2.00314	0.0697029	0.99919	-4.39251
ENSG00000156299	TIAM1	T-cell lymphoma invasion and metastasis 1 [Source:HGNC Symbol;Acc:HGNC:11805]	0.38331	1.79092	2.00288	0.0697339	0.99919	-4.41387
ENSG00000277568	NA	TUC338 [Source:RFAM;Acc:RF02271]	-0.719883	2.88336	-2.00246	0.0697853	0.99919	-4.37021
ENSG00000240875	LINC00886	long intergenic non-protein coding RNA 886 [Source:HGNC Symbol;Acc:HGNC:48572]	0.799538	-0.693057	2.00221	0.0698148	0.99919	-4.52599
ENSG00000105227	PRX	periaxin [Source:HGNC Symbol;Acc:HGNC:13797]	-0.421392	3.75485	-2.00155	0.0698942	0.99919	-4.31691
ENSG00000112576	CCND3	cyclin D3 [Source:HGNC Symbol;Acc:HGNC:1585]	-0.276324	6.14696	-2.00104	0.0699562	0.99919	-4.25183
ENSG00000280047	NA	NA	0.543037	1.59629	2.00063	0.0700056	0.99919	-4.42508
ENSG00000104643	MTMR9	myotubularin related protein 9 [Source:HGNC Symbol;Acc:HGNC:14596]	-0.277343	6.02094	-2.00062	0.0700074	0.99919	-4.25304
ENSG00000070404	FSTL3	follistatin like 3 [Source:HGNC Symbol;Acc:HGNC:3973]	0.516524	2.97642	2.00054	0.0700162	0.99919	-4.34433
ENSG00000168502	MTCL1	microtubule crosslinking factor 1 [Source:HGNC Symbol;Acc:HGNC:29121]	-0.399515	4.25807	-1.99926	0.0701719	0.99919	-4.29568
ENSG00000120457	KCNJ5	potassium voltage-gated channel subfamily J member 5 [Source:HGNC Symbol;Acc:HGNC:6266]	0.79469	2.5581	1.9984	0.0702763	0.99919	-4.3656
ENSG00000278899	NA	NA	0.444541	1.77084	1.99831	0.0702871	0.99919	-4.41521
ENSG00000271503	CCL5	C-C motif chemokine ligand 5 [Source:HGNC Symbol;Acc:HGNC:10632]	0.628276	2.18385	1.99722	0.0704188	0.99919	-4.38862
ENSG00000119314	PTBP3	polypyrimidine tract binding protein 3 [Source:HGNC Symbol;Acc:HGNC:10253]	-0.363177	7.42849	-1.99704	0.0704412	0.99919	-4.25328
ENSG00000048140	TSPAN17	tetraspanin 17 [Source:HGNC Symbol;Acc:HGNC:13594]	0.339523	5.99889	1.99655	0.0705014	0.99919	-4.25365
ENSG00000059691	GATB	glutamyl-tRNA amidotransferase subunit B [Source:HGNC Symbol;Acc:HGNC:8849]	-0.440879	4.35524	-1.99608	0.0705582	0.99919	-4.29405
ENSG00000106031	HOXA13	homeobox A13 [Source:HGNC Symbol;Acc:HGNC:5102]	0.680404	-0.133683	1.99508	0.0706797	0.99919	-4.50807
ENSG00000226742	HSBP1L1	heat shock factor binding protein 1 like 1 [Source:HGNC Symbol;Acc:HGNC:37243]	0.345026	3.70565	1.99506	0.0706826	0.99919	-4.31163
ENSG00000102870	ZNF629	zinc finger protein 629 [Source:HGNC Symbol;Acc:HGNC:29008]	-0.286592	5.53959	-1.99386	0.0708291	0.99919	-4.26165
ENSG00000127124	HIVEP3	human immunodeficiency virus type I enhancer binding protein 3 [Source:HGNC Symbol;Acc:HGNC:13561]	-0.39383	4.94544	-1.99379	0.0708378	0.99919	-4.2749
ENSG00000232228	NA	NA	0.975598	-1.17999	1.99376	0.0708417	0.99919	-4.53823
ENSG00000136514	RTP4	receptor transporter protein 4 [Source:HGNC Symbol;Acc:HGNC:23992]	1.0056	-0.154385	1.99128	0.0711447	0.99919	-4.50725
ENSG00000134107	BHLHE40	basic helix-loop-helix family member e40 [Source:HGNC Symbol;Acc:HGNC:1046]	-0.66534	1.9213	-1.99128	0.0711453	0.99919	-4.42529
ENSG00000154473	BUB3	BUB3, mitotic checkpoint protein [Source:HGNC Symbol;Acc:HGNC:1151]	-0.294518	7.36457	-1.99124	0.0711492	0.99919	-4.25542
ENSG00000231884	NDUFB1P1	NADH:ubiquinone oxidoreductase subunit B1 pseudogene 1 [Source:HGNC Symbol;Acc:HGNC:30893]	1.28813	-1.13603	1.99112	0.071164	0.99919	-4.53523
ENSG00000261324	NA	NA	0.503245	3.46729	1.9905	0.0712406	0.99919	-4.32277
ENSG00000247595	SPTY2D1-AS1	SPTY2D1 antisense RNA 1 [Source:HGNC Symbol;Acc:HGNC:44122]	0.532492	2.21163	1.98985	0.0713201	0.99919	-4.38952
ENSG00000233593	NA	NA	0.384939	2.83873	1.98933	0.071384	0.99919	-4.35586
ENSG00000212385	RNU6-817P	RNA, U6 small nuclear 817, pseudogene [Source:HGNC Symbol;Acc:HGNC:47780]	0.366285	2.2736	1.98929	0.0713892	0.99919	-4.38887
ENSG00000103275	UBE2I	ubiquitin conjugating enzyme E2 I [Source:HGNC Symbol;Acc:HGNC:12485]	-0.286657	7.16543	-1.9891	0.071413	0.99919	-4.2555
ENSG00000166166	TRMT61A	tRNA methyltransferase 61A [Source:HGNC Symbol;Acc:HGNC:23790]	0.309562	4.69764	1.98819	0.0715249	0.99919	-4.2786
ENSG00000131771	PPP1R1B	protein phosphatase 1 regulatory inhibitor subunit 1B [Source:HGNC Symbol;Acc:HGNC:9287]	-0.738946	0.536662	-1.98735	0.0716284	0.99919	-4.49959
ENSG00000166762	CATSPER2	cation channel sperm associated 2 [Source:HGNC Symbol;Acc:HGNC:18810]	0.390682	1.85063	1.98714	0.0716549	0.99919	-4.41374
ENSG00000102144	PGK1	phosphoglycerate kinase 1 [Source:HGNC Symbol;Acc:HGNC:8896]	0.358531	8.1775	1.98613	0.0717796	0.99919	-4.2635
ENSG00000109654	TRIM2	tripartite motif containing 2 [Source:HGNC Symbol;Acc:HGNC:15974]	-0.543544	1.20024	-1.98612	0.0717807	0.99919	-4.46366
ENSG00000169239	CA5B	carbonic anhydrase 5B [Source:HGNC Symbol;Acc:HGNC:1378]	0.366554	3.17084	1.98588	0.0718105	0.99919	-4.33995
ENSG00000167110	GOLGA2	golgin A2 [Source:HGNC Symbol;Acc:HGNC:4425]	-0.596509	6.96872	-1.98561	0.071844	0.99919	-4.25661
ENSG00000108387	SEPT4	septin 4 [Source:HGNC Symbol;Acc:HGNC:9165]	-0.54696	1.66985	-1.98476	0.0719498	0.99919	-4.4382
ENSG00000088325	TPX2	TPX2, microtubule nucleation factor [Source:HGNC Symbol;Acc:HGNC:1249]	-0.291247	8.06425	-1.98473	0.0719527	0.99919	-4.2621
ENSG00000067191	CACNB1	calcium voltage-gated channel auxiliary subunit beta 1 [Source:HGNC Symbol;Acc:HGNC:1401]	-0.534846	0.986224	-1.98467	0.071961	0.99919	-4.47504
ENSG00000172171	TEFM	transcription elongation factor, mitochondrial [Source:HGNC Symbol;Acc:HGNC:26223]	0.41683	2.14278	1.98448	0.0719842	0.99919	-4.39639
ENSG00000188215	DCUN1D3	defective in cullin neddylation 1 domain containing 3 [Source:HGNC Symbol;Acc:HGNC:28734]	-0.486129	2.16045	-1.98086	0.0724346	0.99919	-4.40817
ENSG00000205937	RNPS1	RNA binding protein with serine rich domain 1 [Source:HGNC Symbol;Acc:HGNC:10080]	-0.267552	6.8358	-1.98065	0.0724601	0.99919	-4.25831
ENSG00000142632	ARHGEF19	Rho guanine nucleotide exchange factor 19 [Source:HGNC Symbol;Acc:HGNC:26604]	-0.29476	5.27862	-1.97875	0.0726977	0.99919	-4.2723
ENSG00000276698	NA	NA	0.569887	0.727264	1.97869	0.0727057	0.99919	-4.47438
ENSG00000197808	ZNF461	zinc finger protein 461 [Source:HGNC Symbol;Acc:HGNC:21629]	0.423548	1.70539	1.97787	0.0728083	0.99919	-4.42358
ENSG00000267919	NA	NA	-0.756435	0.256184	-1.97642	0.0729908	0.99919	-4.50972
ENSG00000123444	KBTBD4	kelch repeat and BTB domain containing 4 [Source:HGNC Symbol;Acc:HGNC:23761]	0.397639	1.84641	1.97531	0.0731305	0.99919	-4.41649
ENSG00000073111	MCM2	minichromosome maintenance complex component 2 [Source:HGNC Symbol;Acc:HGNC:6944]	-0.263879	7.16343	-1.97456	0.0732242	0.99919	-4.26153
ENSG00000250571	GLI4	GLI family zinc finger 4 [Source:HGNC Symbol;Acc:HGNC:4320]	0.530055	0.225322	1.97123	0.0736461	0.99919	-4.49805
ENSG00000110330	BIRC2	baculoviral IAP repeat containing 2 [Source:HGNC Symbol;Acc:HGNC:590]	-0.231045	6.99843	-1.96984	0.0738217	0.99919	-4.26303
ENSG00000165169	DYNLT3	dynein light chain Tctex-type 3 [Source:HGNC Symbol;Acc:HGNC:11694]	-0.947875	-0.620201	-1.96967	0.0738435	0.99919	-4.53605
ENSG00000271380	NA	NA	0.762329	1.37659	1.96876	0.0739596	0.99919	-4.44037
ENSG00000253729	PRKDC	protein kinase, DNA-activated, catalytic polypeptide [Source:HGNC Symbol;Acc:HGNC:9413]	-0.54101	7.28824	-1.96843	0.0740013	0.99919	-4.2644
ENSG00000224578	HNRNPA1P48	heterogeneous nuclear ribonucleoprotein A1 pseudogene 48 [Source:HGNC Symbol;Acc:HGNC:48778]	-0.669154	2.92688	-1.96829	0.0740193	0.99919	-4.37575
ENSG00000183665	TRMT12	tRNA methyltransferase 12 homolog [Source:HGNC Symbol;Acc:HGNC:26091]	-0.259688	4.10031	-1.96507	0.0744301	0.99919	-4.31198
ENSG00000225649	NA	NA	-0.663209	0.215508	-1.96353	0.0746274	0.99919	-4.51268
ENSG00000004660	CAMKK1	calcium/calmodulin dependent protein kinase kinase 1 [Source:HGNC Symbol;Acc:HGNC:1469]	-0.316555	2.86471	-1.96335	0.0746507	0.99919	-4.37157
ENSG00000183826	BTBD9	BTB domain containing 9 [Source:HGNC Symbol;Acc:HGNC:21228]	-0.313922	3.73186	-1.96236	0.0747776	0.99919	-4.32886
ENSG00000240137	ERICH6-AS1	ERICH6 antisense RNA 1 [Source:HGNC Symbol;Acc:HGNC:41205]	0.544482	0.621562	1.96066	0.0749966	0.99919	-4.48195
ENSG00000198467	TPM2	tropomyosin 2 (beta) [Source:HGNC Symbol;Acc:HGNC:12011]	0.365779	6.97778	1.96017	0.07506	0.99919	-4.26741
ENSG00000171084	FAM86JP	family with sequence similarity 86 member J, pseudogene [Source:HGNC Symbol;Acc:HGNC:44097]	-0.274227	5.21174	-1.95997	0.0750851	0.99919	-4.28091
ENSG00000064886	CHI3L2	chitinase 3 like 2 [Source:HGNC Symbol;Acc:HGNC:1933]	0.563343	3.85661	1.95971	0.0751186	0.99919	-4.31568
ENSG00000141040	ZNF287	zinc finger protein 287 [Source:HGNC Symbol;Acc:HGNC:13502]	0.408091	2.38391	1.95945	0.0751531	0.99919	-4.38885
ENSG00000183317	EPHA10	EPH receptor A10 [Source:HGNC Symbol;Acc:HGNC:19987]	-0.492732	3.50318	-1.95931	0.0751709	0.99919	-4.34194
ENSG00000175611	LINC00476	long intergenic non-protein coding RNA 476 [Source:HGNC Symbol;Acc:HGNC:27858]	0.40613	2.90816	1.95732	0.0754285	0.99919	-4.36174
ENSG00000254685	FPGT	fucose-1-phosphate guanylyltransferase [Source:HGNC Symbol;Acc:HGNC:3825]	0.331231	3.02269	1.95623	0.0755695	0.99919	-4.3564
ENSG00000225163	LINC00618	long intergenic non-protein coding RNA 618 [Source:HGNC Symbol;Acc:HGNC:20110]	-1.14904	0.383852	-1.95568	0.0756406	0.99919	-4.51562
ENSG00000049249	TNFRSF9	TNF receptor superfamily member 9 [Source:HGNC Symbol;Acc:HGNC:11924]	0.50191	3.32885	1.95551	0.0756627	0.99919	-4.33993
ENSG00000167996	FTH1	ferritin heavy chain 1 [Source:HGNC Symbol;Acc:HGNC:3976]	0.478588	10.5584	1.95496	0.0757352	0.99919	-4.29435
ENSG00000269903	NA	NA	0.704032	-0.315881	1.95443	0.075803	0.99919	-4.51901
ENSG00000167566	NCKAP5L	NCK associated protein 5 like [Source:HGNC Symbol;Acc:HGNC:29321]	-0.56763	1.82229	-1.95443	0.0758036	0.99919	-4.43794
ENSG00000188878	FBF1	Fas binding factor 1 [Source:HGNC Symbol;Acc:HGNC:24674]	0.325901	3.90779	1.95396	0.0758643	0.99919	-4.3174
ENSG00000095752	IL11	interleukin 11 [Source:HGNC Symbol;Acc:HGNC:5966]	-0.317767	3.14268	-1.95313	0.0759735	0.99919	-4.36028
ENSG00000162650	ATXN7L2	ataxin 7 like 2 [Source:HGNC Symbol;Acc:HGNC:28713]	-0.390724	2.41182	-1.95308	0.07598	0.99919	-4.40103
ENSG00000152601	MBNL1	muscleblind like splicing regulator 1 [Source:HGNC Symbol;Acc:HGNC:6923]	-0.267959	6.691	-1.95196	0.0761258	0.99919	-4.2702
ENSG00000275437	NA	NA	0.717351	-0.20176	1.95091	0.076263	0.99919	-4.51568
ENSG00000164024	METAP1	methionyl aminopeptidase 1 [Source:HGNC Symbol;Acc:HGNC:15789]	-0.254183	5.99515	-1.95031	0.0763422	0.99919	-4.27385
ENSG00000120254	MTHFD1L	methylenetetrahydrofolate dehydrogenase (NADP+ dependent) 1-like [Source:HGNC Symbol;Acc:HGNC:21055]	0.267989	5.13745	1.94952	0.0764453	0.99919	-4.28363
ENSG00000262691	NA	NA	-0.819153	-0.393235	-1.94731	0.0767352	0.99919	-4.53261
ENSG00000159202	UBE2Z	ubiquitin conjugating enzyme E2 Z [Source:HGNC Symbol;Acc:HGNC:25847]	-0.38278	6.41467	-1.94727	0.0767411	0.99919	-4.27287
ENSG00000147536	GINS4	GINS complex subunit 4 [Source:HGNC Symbol;Acc:HGNC:28226]	-0.240204	6.292	-1.94688	0.0767918	0.99919	-4.27323
ENSG00000158526	TSR2	TSR2, ribosome maturation factor [Source:HGNC Symbol;Acc:HGNC:25455]	-0.250336	4.50757	-1.94667	0.0768193	0.99919	-4.30412
ENSG00000078070	MCCC1	methylcrotonoyl-CoA carboxylase 1 [Source:HGNC Symbol;Acc:HGNC:6936]	0.233102	4.48352	1.9463	0.0768682	0.99919	-4.301
ENSG00000258122	NA	NA	0.848174	1.2369	1.94549	0.076975	0.99919	-4.45113
ENSG00000141258	SGSM2	small G protein signaling modulator 2 [Source:HGNC Symbol;Acc:HGNC:29026]	-0.299242	5.93793	-1.94378	0.0772022	0.99919	-4.27721
ENSG00000182022	CHST15	carbohydrate sulfotransferase 15 [Source:HGNC Symbol;Acc:HGNC:18137]	-0.280339	5.80614	-1.9436	0.0772257	0.99919	-4.27848
ENSG00000102934	PLLP	plasmolipin [Source:HGNC Symbol;Acc:HGNC:18553]	-0.545056	2.26409	-1.94258	0.0773608	0.99919	-4.41417
ENSG00000197329	PELI1	pellino E3 ubiquitin protein ligase 1 [Source:HGNC Symbol;Acc:HGNC:8827]	-0.377148	1.76076	-1.94232	0.0773953	0.99919	-4.43951
ENSG00000253958	CLDN23	claudin 23 [Source:HGNC Symbol;Acc:HGNC:17591]	0.905817	-0.287449	1.94161	0.0774896	0.99919	-4.51732
ENSG00000128059	PPAT	phosphoribosyl pyrophosphate amidotransferase [Source:HGNC Symbol;Acc:HGNC:9238]	-0.355154	4.00596	-1.94122	0.0775412	0.99919	-4.32505
ENSG00000144451	SPAG16	sperm associated antigen 16 [Source:HGNC Symbol;Acc:HGNC:23225]	-0.242697	6.46236	-1.94081	0.0775963	0.99919	-4.27512
ENSG00000180098	TRNAU1AP	tRNA selenocysteine 1 associated protein 1 [Source:HGNC Symbol;Acc:HGNC:30813]	-0.283331	6.16351	-1.94031	0.0776623	0.99919	-4.27676
ENSG00000135097	MSI1	musashi RNA binding protein 1 [Source:HGNC Symbol;Acc:HGNC:7330]	-0.60415	0.848069	-1.94002	0.0777014	0.99919	-4.4896
ENSG00000272275	NA	NA	-0.739015	-0.228892	-1.93922	0.077808	0.99919	-4.52752
ENSG00000256043	CTSO	cathepsin O [Source:HGNC Symbol;Acc:HGNC:2542]	0.382174	2.31689	1.93885	0.0778575	0.99919	-4.39769
ENSG00000180354	MTURN	maturin, neural progenitor differentiation regulator homolog [Source:HGNC Symbol;Acc:HGNC:25457]	0.380836	4.31713	1.93884	0.0778579	0.99919	-4.3079
ENSG00000162419	GMEB1	glucocorticoid modulatory element binding protein 1 [Source:HGNC Symbol;Acc:HGNC:4370]	-0.242181	4.4245	-1.9386	0.077891	0.99919	-4.30962
ENSG00000100867	DHRS2	dehydrogenase/reductase 2 [Source:HGNC Symbol;Acc:HGNC:18349]	0.417338	4.44843	1.93859	0.0778922	0.99919	-4.30362
ENSG00000065989	PDE4A	phosphodiesterase 4A [Source:HGNC Symbol;Acc:HGNC:8780]	-0.577737	0.408337	-1.93853	0.077899	0.99919	-4.50554
ENSG00000136153	LMO7	LIM domain 7 [Source:HGNC Symbol;Acc:HGNC:6646]	0.321565	3.04283	1.93839	0.0779182	0.99919	-4.36097
ENSG00000099624	ATP5D	ATP synthase, H+ transporting, mitochondrial F1 complex, delta subunit [Source:HGNC Symbol;Acc:HGNC:837]	0.511987	5.42662	1.93771	0.0780087	0.99919	-4.2831
ENSG00000132510	KDM6B	lysine demethylase 6B [Source:HGNC Symbol;Acc:HGNC:29012]	-0.358873	2.74147	-1.93753	0.0780335	0.99919	-4.38542
ENSG00000217716	RPS10P3	ribosomal protein S10 pseudogene 3 [Source:HGNC Symbol;Acc:HGNC:23684]	0.652982	-0.294625	1.93726	0.0780697	0.99919	-4.51984
ENSG00000226179	LINC00685	long intergenic non-protein coding RNA 685 [Source:HGNC Symbol;Acc:HGNC:27560]	0.538806	4.14593	1.9348	0.0783996	0.99919	-4.31371
ENSG00000185761	ADAMTSL5	ADAMTS like 5 [Source:HGNC Symbol;Acc:HGNC:27912]	-0.326888	3.13974	-1.93434	0.0784602	0.99919	-4.36541
ENSG00000149043	SYT8	synaptotagmin 8 [Source:HGNC Symbol;Acc:HGNC:19264]	-0.747346	0.0436673	-1.93427	0.0784701	0.99919	-4.52034
ENSG00000115419	GLS	glutaminase [Source:HGNC Symbol;Acc:HGNC:4331]	-0.232337	5.2705	-1.93419	0.078481	0.99919	-4.28967
ENSG00000087995	METTL2A	methyltransferase like 2A [Source:HGNC Symbol;Acc:HGNC:25755]	-0.334082	5.16013	-1.93372	0.0785446	0.99919	-4.29276
ENSG00000233668	NA	NA	0.718869	0.383286	1.93328	0.0786038	0.99919	-4.49517
ENSG00000167755	KLK6	kallikrein related peptidase 6 [Source:HGNC Symbol;Acc:HGNC:6367]	-0.3258	7.38301	-1.93292	0.0786525	0.99919	-4.27953
ENSG00000213700	RPL17P50	ribosomal protein L17 pseudogene 50 [Source:HGNC Symbol;Acc:HGNC:45098]	-0.453803	1.6165	-1.93258	0.0786982	0.99919	-4.44871
ENSG00000235423	NA	NA	0.663662	-0.523122	1.93245	0.0787147	0.99919	-4.52704
ENSG00000167549	CORO6	coronin 6 [Source:HGNC Symbol;Acc:HGNC:21356]	0.445339	1.87363	1.93208	0.0787652	0.99919	-4.42262
ENSG00000228360	NA	NA	0.890121	-1.0428	1.93034	0.0789999	0.99919	-4.53912
ENSG00000277597	NA	NA	-0.427455	1.77528	-1.93027	0.0790099	0.99919	-4.44232
ENSG00000008324	SS18L2	SS18 like 2 [Source:HGNC Symbol;Acc:HGNC:15593]	-0.279215	5.35299	-1.92901	0.0791796	0.99919	-4.29055
ENSG00000180509	KCNE1	potassium voltage-gated channel subfamily E regulatory subunit 1 [Source:HGNC Symbol;Acc:HGNC:6240]	0.529861	0.247392	1.92813	0.0792998	0.99919	-4.50298
ENSG00000165434	PGM2L1	phosphoglucomutase 2 like 1 [Source:HGNC Symbol;Acc:HGNC:20898]	0.344444	4.16974	1.9261	0.0795751	0.99919	-4.31773
ENSG00000102103	PQBP1	polyglutamine binding protein 1 [Source:HGNC Symbol;Acc:HGNC:9330]	0.276814	5.61846	1.92557	0.0796481	0.99919	-4.28615
ENSG00000130303	BST2	bone marrow stromal cell antigen 2 [Source:HGNC Symbol;Acc:HGNC:1119]	-0.718708	4.34894	-1.92547	0.0796611	0.99919	-4.32174
ENSG00000260025	NA	NA	0.405162	3.0662	1.92512	0.0797086	0.99919	-4.3631
ENSG00000258472	NA	NA	-0.570494	1.24196	-1.92443	0.0798029	0.99919	-4.47068
ENSG00000160789	LMNA	lamin A/C [Source:HGNC Symbol;Acc:HGNC:6636]	0.458718	8.7482	1.92409	0.0798499	0.99919	-4.29283
ENSG00000214530	STARD10	StAR related lipid transfer domain containing 10 [Source:HGNC Symbol;Acc:HGNC:10666]	0.527472	1.80063	1.92277	0.0800301	0.99919	-4.42883
ENSG00000154639	CXADR	coxsackie virus and adenovirus receptor [Source:HGNC Symbol;Acc:HGNC:2559]	-0.434707	1.89912	-1.92194	0.0801442	0.99919	-4.43609
ENSG00000145439	CBR4	carbonyl reductase 4 [Source:HGNC Symbol;Acc:HGNC:25891]	0.310729	5.41482	1.92122	0.0802427	0.99919	-4.29031
ENSG00000100092	SH3BP1	SH3 domain binding protein 1 [Source:HGNC Symbol;Acc:HGNC:10824]	-0.322602	2.64403	-1.92095	0.0802794	0.99919	-4.39409
ENSG00000106991	ENG	endoglin [Source:HGNC Symbol;Acc:HGNC:3349]	0.524862	2.81425	1.91953	0.0804742	0.99919	-4.37592
ENSG00000131470	PSMC3IP	PSMC3 interacting protein [Source:HGNC Symbol;Acc:HGNC:17928]	-0.301193	4.92614	-1.91916	0.0805256	0.99919	-4.30341
ENSG00000160957	RECQL4	RecQ like helicase 4 [Source:HGNC Symbol;Acc:HGNC:9949]	-0.255223	7.12491	-1.91796	0.0806909	0.99919	-4.28479
ENSG00000198478	SH3BGRL2	SH3 domain binding glutamate rich protein like 2 [Source:HGNC Symbol;Acc:HGNC:15567]	1.02966	-1.02555	1.91782	0.0807098	0.99919	-4.53915
ENSG00000132109	TRIM21	tripartite motif containing 21 [Source:HGNC Symbol;Acc:HGNC:11312]	-0.348622	2.84579	-1.91715	0.0808029	0.99919	-4.38626
ENSG00000236609	ZNF853	zinc finger protein 853 [Source:HGNC Symbol;Acc:HGNC:21767]	0.435845	2.6423	1.91706	0.0808152	0.99919	-4.38556
ENSG00000075711	DLG1	discs large MAGUK scaffold protein 1 [Source:HGNC Symbol;Acc:HGNC:2900]	0.264187	7.33977	1.91688	0.0808393	0.99919	-4.28645
ENSG00000149564	ESAM	endothelial cell adhesion molecule [Source:HGNC Symbol;Acc:HGNC:17474]	-0.43726	1.70077	-1.91653	0.0808881	0.99919	-4.44798
ENSG00000188290	HES4	hes family bHLH transcription factor 4 [Source:HGNC Symbol;Acc:HGNC:24149]	-0.544292	1.58722	-1.91594	0.0809702	0.99919	-4.45616
ENSG00000146112	PPP1R18	protein phosphatase 1 regulatory subunit 18 [Source:HGNC Symbol;Acc:HGNC:29413]	-0.307657	6.06117	-1.91529	0.0810594	0.99919	-4.28782
ENSG00000071243	ING3	inhibitor of growth family member 3 [Source:HGNC Symbol;Acc:HGNC:14587]	-0.284091	4.71308	-1.91521	0.0810714	0.99919	-4.31022
ENSG00000266947	NA	NA	0.698702	-0.158988	1.91509	0.0810871	0.99919	-4.51646
ENSG00000148200	NR6A1	nuclear receptor subfamily 6 group A member 1 [Source:HGNC Symbol;Acc:HGNC:7985]	-0.464872	2.38837	-1.91479	0.0811289	0.99919	-4.41367
ENSG00000166454	ATMIN	ATM interactor [Source:HGNC Symbol;Acc:HGNC:29034]	-0.262465	6.57671	-1.9132	0.0813493	0.99919	-4.28633
ENSG00000240950	NA	NA	0.672578	-0.045656	1.91295	0.081385	0.99919	-4.51448
ENSG00000271869	NA	NA	0.38684	3.12845	1.91284	0.0813996	0.99919	-4.36399
ENSG00000100379	KCTD17	potassium channel tetramerization domain containing 17 [Source:HGNC Symbol;Acc:HGNC:25705]	-0.323852	5.65309	-1.91254	0.081441	0.99919	-4.29306
ENSG00000233695	GAS6-AS1	GAS6 antisense RNA 1 [Source:HGNC Symbol;Acc:HGNC:39826]	0.532219	1.02669	1.91232	0.0814716	0.99919	-4.46958
ENSG00000277287	NA	NA	0.64548	-0.270207	1.91167	0.0815628	0.99919	-4.5216
ENSG00000144909	OSBPL11	oxysterol binding protein like 11 [Source:HGNC Symbol;Acc:HGNC:16397]	0.325467	3.83484	1.91156	0.081578	0.99919	-4.3347
ENSG00000240509	RPL34P18	ribosomal protein L34 pseudogene 18 [Source:HGNC Symbol;Acc:HGNC:35968]	0.415163	4.51884	1.91052	0.0817228	0.99919	-4.31222
ENSG00000100075	SLC25A1	solute carrier family 25 member 1 [Source:HGNC Symbol;Acc:HGNC:10979]	0.302001	5.24937	1.91041	0.081738	0.99919	-4.29709
ENSG00000276390	NA	NA	-0.489481	0.819168	-1.9102	0.0817683	0.99919	-4.49294
ENSG00000040633	PHF23	PHD finger protein 23 [Source:HGNC Symbol;Acc:HGNC:28428]	-0.289202	5.80409	-1.90967	0.0818412	0.99919	-4.29238
ENSG00000173456	RNF26	ring finger protein 26 [Source:HGNC Symbol;Acc:HGNC:14646]	0.24156	5.6983	1.90952	0.0818631	0.99919	-4.29194
ENSG00000213096	ZNF254	zinc finger protein 254 [Source:HGNC Symbol;Acc:HGNC:13047]	0.483281	1.5745	1.9095	0.0818654	0.99919	-4.44394
ENSG00000078269	SYNJ2	synaptojanin 2 [Source:HGNC Symbol;Acc:HGNC:11504]	-0.446205	4.36263	-1.90918	0.0819097	0.99919	-4.3247
ENSG00000067365	METTL22	methyltransferase like 22 [Source:HGNC Symbol;Acc:HGNC:28368]	0.323416	2.99576	1.90758	0.0821345	0.99919	-4.3723
ENSG00000179988	PSTK	phosphoseryl-tRNA kinase [Source:HGNC Symbol;Acc:HGNC:28578]	0.394661	1.91367	1.9074	0.0821589	0.99919	-4.42674
ENSG00000151651	ADAM8	ADAM metallopeptidase domain 8 [Source:HGNC Symbol;Acc:HGNC:215]	-0.32842	5.42806	-1.90558	0.0824143	0.99919	-4.2989
ENSG00000253251	NA	NA	-0.450149	1.57221	-1.90544	0.0824349	0.99919	-4.45652
ENSG00000165244	ZNF367	zinc finger protein 367 [Source:HGNC Symbol;Acc:HGNC:18320]	-0.479381	5.44787	-1.90535	0.0824472	0.99919	-4.29967
ENSG00000111181	SLC6A12	solute carrier family 6 member 12 [Source:HGNC Symbol;Acc:HGNC:11045]	0.483322	1.88318	1.90533	0.0824502	0.99919	-4.42774
ENSG00000007520	TSR3	TSR3, acp transferase ribosome maturation factor [Source:HGNC Symbol;Acc:HGNC:14175]	0.245731	5.90934	1.90486	0.0825164	0.99919	-4.29206
ENSG00000131263	RLIM	ring finger protein, LIM domain interacting [Source:HGNC Symbol;Acc:HGNC:13429]	-0.292393	6.59834	-1.90478	0.0825274	0.99919	-4.28981
ENSG00000105617	LENG1	leukocyte receptor cluster member 1 [Source:HGNC Symbol;Acc:HGNC:15502]	0.403496	2.01751	1.90432	0.0825928	0.99919	-4.42211
ENSG00000232995	NA	regulator of G-protein signaling 5 [Source:EntrezGene;Acc:8490]	-0.394757	1.25418	-1.90421	0.0826077	0.99919	-4.47126
ENSG00000260651	NA	NA	1.08146	-0.998878	1.90371	0.082678	0.99919	-4.54005
ENSG00000142619	PADI3	peptidyl arginine deiminase 3 [Source:HGNC Symbol;Acc:HGNC:18337]	-0.493044	4.66143	-1.90264	0.0828289	0.99919	-4.31832
ENSG00000176973	FAM89B	family with sequence similarity 89 member B [Source:HGNC Symbol;Acc:HGNC:16708]	0.431807	4.46348	1.90242	0.0828608	0.99919	-4.31673
ENSG00000250132	NA	NA	0.340636	2.34671	1.90217	0.0828964	0.99919	-4.40594
ENSG00000183401	CCDC159	coiled-coil domain containing 159 [Source:HGNC Symbol;Acc:HGNC:26996]	0.511157	0.159551	1.90123	0.0830286	0.99919	-4.50821
ENSG00000163093	BBS5	Bardet-Biedl syndrome 5 [Source:HGNC Symbol;Acc:HGNC:970]	-0.566862	1.81356	-1.90063	0.0831142	0.99919	-4.4449
ENSG00000272009	NA	NA	0.40914	2.60887	1.90046	0.0831375	0.99919	-4.39194
ENSG00000183527	PSMG1	proteasome assembly chaperone 1 [Source:HGNC Symbol;Acc:HGNC:3043]	-0.295723	6.88426	-1.90016	0.0831806	0.99919	-4.29168
ENSG00000135643	KCNMB4	potassium calcium-activated channel subfamily M regulatory beta subunit 4 [Source:HGNC Symbol;Acc:HGNC:6289]	0.329362	2.7233	1.89928	0.0833051	0.99919	-4.38752
ENSG00000174886	NDUFA11	NADH:ubiquinone oxidoreductase subunit A11 [Source:HGNC Symbol;Acc:HGNC:20371]	-0.41907	7.85412	-1.8992	0.0833172	0.99919	-4.29549
ENSG00000110880	CORO1C	coronin 1C [Source:HGNC Symbol;Acc:HGNC:2254]	0.25118	6.42932	1.89763	0.0835397	0.99919	-4.29264
ENSG00000106100	NOD1	nucleotide binding oligomerization domain containing 1 [Source:HGNC Symbol;Acc:HGNC:16390]	-0.265247	4.18038	-1.89683	0.0836533	0.99919	-4.33282
ENSG00000102390	PBDC1	polysaccharide biosynthesis domain containing 1 [Source:HGNC Symbol;Acc:HGNC:28790]	-0.354256	7.11402	-1.89679	0.0836596	0.99919	-4.29346
ENSG00000265241	RBM8A	RNA binding motif protein 8A [Source:HGNC Symbol;Acc:HGNC:9905]	-0.30336	8.00445	-1.89517	0.0838915	0.99919	-4.29809
ENSG00000197136	PCNX3	pecanex homolog 3 (Drosophila) [Source:HGNC Symbol;Acc:HGNC:18760]	0.405702	1.76291	1.89506	0.0839061	0.99919	-4.43759
ENSG00000169231	THBS3	thrombospondin 3 [Source:HGNC Symbol;Acc:HGNC:11787]	0.273906	5.49268	1.89484	0.0839381	0.99919	-4.30003
ENSG00000128928	IVD	isovaleryl-CoA dehydrogenase [Source:HGNC Symbol;Acc:HGNC:6186]	-0.236156	6.66699	-1.89468	0.0839606	0.99919	-4.29385
ENSG00000105997	HOXA3	homeobox A3 [Source:HGNC Symbol;Acc:HGNC:5104]	-0.309505	4.03119	-1.89347	0.0841337	0.99919	-4.3398
ENSG00000167972	ABCA3	ATP binding cassette subfamily A member 3 [Source:HGNC Symbol;Acc:HGNC:33]	0.317145	5.38003	1.89266	0.0842504	0.99919	-4.30227
ENSG00000174136	RGMB	repulsive guidance molecule family member b [Source:HGNC Symbol;Acc:HGNC:26896]	-0.2918	5.87647	-1.89166	0.0843933	0.99919	-4.29898
ENSG00000107438	PDLIM1	PDZ and LIM domain 1 [Source:HGNC Symbol;Acc:HGNC:2067]	0.924372	4.38204	1.88925	0.0847412	0.99919	-4.32195
ENSG00000145675	PIK3R1	phosphoinositide-3-kinase regulatory subunit 1 [Source:HGNC Symbol;Acc:HGNC:8979]	-0.283511	4.11714	-1.88912	0.0847601	0.99919	-4.33792
ENSG00000126822	PLEKHG3	pleckstrin homology and RhoGEF domain containing G3 [Source:HGNC Symbol;Acc:HGNC:20364]	0.247139	5.06534	1.8891	0.0847622	0.99919	-4.30887
ENSG00000271862	NA	NA	0.668637	0.274956	1.88832	0.0848752	0.99919	-4.505
ENSG00000280033	NA	NA	-0.565741	-0.248317	-1.88808	0.08491	0.99919	-4.53094
ENSG00000158023	WDR66	WD repeat domain 66 [Source:HGNC Symbol;Acc:HGNC:28506]	0.449386	1.07986	1.88726	0.0850279	0.99919	-4.47266
ENSG00000067560	RHOA	ras homolog family member A [Source:HGNC Symbol;Acc:HGNC:667]	-0.274521	9.21048	-1.88627	0.0851713	0.99919	-4.30973
ENSG00000154429	CCSAP	centriole, cilia and spindle associated protein [Source:HGNC Symbol;Acc:HGNC:29578]	-0.386482	5.51259	-1.8861	0.085196	0.99919	-4.30582
ENSG00000111206	FOXM1	forkhead box M1 [Source:HGNC Symbol;Acc:HGNC:3818]	0.275878	7.45793	1.88607	0.0852002	0.99919	-4.29959
ENSG00000143224	PPOX	protoporphyrinogen oxidase [Source:HGNC Symbol;Acc:HGNC:9280]	0.29588	4.31316	1.88606	0.0852023	0.99919	-4.32785
ENSG00000064419	TNPO3	transportin 3 [Source:HGNC Symbol;Acc:HGNC:17103]	-0.365293	8.1874	-1.88576	0.0852454	0.99919	-4.30292
ENSG00000132386	SERPINF1	serpin family F member 1 [Source:HGNC Symbol;Acc:HGNC:8824]	0.28797	5.64013	1.88361	0.0855583	0.99919	-4.30291
ENSG00000169045	HNRNPH1	heterogeneous nuclear ribonucleoprotein H1 (H) [Source:HGNC Symbol;Acc:HGNC:5041]	-0.301397	9.67104	-1.88304	0.0856408	0.99919	-4.31409
ENSG00000279464	NA	NA	-0.800005	-0.415466	-1.88274	0.0856846	0.99919	-4.53848
ENSG00000225439	BOLA3-AS1	BOLA3 antisense RNA 1 (head to head) [Source:HGNC Symbol;Acc:HGNC:42922]	0.440972	0.708106	1.88148	0.0858692	0.99919	-4.49047
ENSG00000102030	NAA10	N(alpha)-acetyltransferase 10, NatA catalytic subunit [Source:HGNC Symbol;Acc:HGNC:18704]	0.444	6.885	1.87941	0.0861715	0.99919	-4.30054
ENSG00000115641	FHL2	four and a half LIM domains 2 [Source:HGNC Symbol;Acc:HGNC:3703]	0.500992	5.787	1.87897	0.0862361	0.99919	-4.30322
ENSG00000183048	SLC25A10	solute carrier family 25 member 10 [Source:HGNC Symbol;Acc:HGNC:10980]	0.308007	3.71999	1.87893	0.0862415	0.99919	-4.35021
ENSG00000270605	NA	NA	0.446787	2.20292	1.87866	0.0862811	0.99919	-4.41764
ENSG00000163956	LRPAP1	LDL receptor related protein associated protein 1 [Source:HGNC Symbol;Acc:HGNC:6701]	0.226605	6.2469	1.87837	0.0863243	0.99919	-4.30111
ENSG00000259804	NA	NA	0.678647	-0.776834	1.87805	0.086371	0.99919	-4.53747
ENSG00000275714	HIST1H3A	histone cluster 1, H3a [Source:HGNC Symbol;Acc:HGNC:4766]	0.84678	-0.765671	1.87796	0.0863842	0.99919	-4.53653
ENSG00000238197	PAXBP1-AS1	PAXBP1 antisense RNA 1 [Source:HGNC Symbol;Acc:HGNC:39603]	0.559477	0.343643	1.8777	0.0864223	0.99919	-4.50378
ENSG00000272931	NA	NA	-0.263306	4.05784	-1.87696	0.0865312	0.99919	-4.34398
ENSG00000270647	TAF15	TATA-box binding protein associated factor 15 [Source:HGNC Symbol;Acc:HGNC:11547]	-0.23597	6.34052	-1.87617	0.0866471	0.99919	-4.30214
ENSG00000110852	CLEC2B	C-type lectin domain family 2 member B [Source:HGNC Symbol;Acc:HGNC:2053]	0.284533	5.97595	1.87563	0.0867266	0.99919	-4.30351
ENSG00000242802	AP5Z1	adaptor related protein complex 5 zeta 1 subunit [Source:HGNC Symbol;Acc:HGNC:22197]	-0.252223	6.99936	-1.87527	0.0867803	0.99919	-4.30208
ENSG00000268516	NA	NA	0.286206	3.30994	1.87498	0.0868225	0.99919	-4.36813
ENSG00000001036	FUCA2	fucosidase, alpha-L- 2, plasma [Source:HGNC Symbol;Acc:HGNC:4008]	0.277102	5.53998	1.87472	0.086861	0.99919	-4.30758
ENSG00000180479	ZNF571	zinc finger protein 571 [Source:HGNC Symbol;Acc:HGNC:25000]	-0.660153	0.0644817	-1.87469	0.0868654	0.99919	-4.52489
ENSG00000244462	RBM12	RNA binding motif protein 12 [Source:HGNC Symbol;Acc:HGNC:9898]	-0.251898	6.02504	-1.8737	0.0870124	0.99919	-4.30493
ENSG00000013810	TACC3	transforming acidic coiled-coil containing protein 3 [Source:HGNC Symbol;Acc:HGNC:11524]	-0.372395	7.6052	-1.87351	0.08704	0.99919	-4.3048
ENSG00000174405	LIG4	DNA ligase 4 [Source:HGNC Symbol;Acc:HGNC:6601]	-0.519609	1.92422	-1.87163	0.0873186	0.99919	-4.44787
ENSG00000159216	RUNX1	runt related transcription factor 1 [Source:HGNC Symbol;Acc:HGNC:10471]	-0.240771	6.41449	-1.87142	0.0873495	0.99919	-4.30385
ENSG00000137331	IER3	immediate early response 3 [Source:HGNC Symbol;Acc:HGNC:5392]	-0.508801	5.78961	-1.87124	0.0873761	0.99919	-4.30888
ENSG00000171067	C11orf24	chromosome 11 open reading frame 24 [Source:HGNC Symbol;Acc:HGNC:1174]	0.257499	4.67785	1.871	0.0874121	0.99919	-4.32397
ENSG00000139800	ZIC5	Zic family member 5 [Source:HGNC Symbol;Acc:HGNC:20322]	-0.496833	0.460077	-1.87091	0.0874255	0.99919	-4.51081
ENSG00000272636	DOC2B	double C2 domain beta [Source:HGNC Symbol;Acc:HGNC:2986]	-0.594947	0.0768032	-1.87073	0.0874518	0.99919	-4.52407
ENSG00000234160	NA	NA	-0.371448	2.71905	-1.87036	0.0875063	0.99919	-4.40523
ENSG00000163249	CCNYL1	cyclin Y like 1 [Source:HGNC Symbol;Acc:HGNC:26868]	-0.28707	4.06168	-1.86958	0.087623	0.99919	-4.34673
ENSG00000123240	OPTN	optineurin [Source:HGNC Symbol;Acc:HGNC:17142]	0.239631	7.16365	1.8694	0.0876491	0.99919	-4.30526
ENSG00000188997	KCTD21	potassium channel tetramerization domain containing 21 [Source:HGNC Symbol;Acc:HGNC:27452]	0.420317	1.88884	1.86922	0.0876761	0.99919	-4.43575
ENSG00000139625	MAP3K12	mitogen-activated protein kinase kinase kinase 12 [Source:HGNC Symbol;Acc:HGNC:6851]	-0.355917	2.66326	-1.86877	0.0877427	0.99919	-4.40757
ENSG00000102897	LYRM1	LYR motif containing 1 [Source:HGNC Symbol;Acc:HGNC:25074]	-0.352899	4.18925	-1.86874	0.0877478	0.99919	-4.34352
ENSG00000101255	TRIB3	tribbles pseudokinase 3 [Source:HGNC Symbol;Acc:HGNC:16228]	-0.334533	4.17454	-1.86798	0.0878608	0.99919	-4.34373
ENSG00000066044	ELAVL1	ELAV like RNA binding protein 1 [Source:HGNC Symbol;Acc:HGNC:3312]	-0.395035	7.1543	-1.86788	0.0878757	0.99919	-4.30544
ENSG00000185988	PLK5	polo like kinase 5 [Source:HGNC Symbol;Acc:HGNC:27001]	-0.582612	1.09734	-1.86778	0.0878916	0.99919	-4.48668
ENSG00000167632	TRAPPC9	trafficking protein particle complex 9 [Source:HGNC Symbol;Acc:HGNC:30832]	0.432299	4.72584	1.86622	0.0881234	0.99919	-4.3239
ENSG00000229358	DPY19L1P1	DPY19L1 pseudogene 1 [Source:HGNC Symbol;Acc:HGNC:22395]	0.550579	0.86285	1.86613	0.0881372	0.99919	-4.48407
ENSG00000267534	S1PR2	sphingosine-1-phosphate receptor 2 [Source:HGNC Symbol;Acc:HGNC:3169]	-0.535087	2.74476	-1.86579	0.0881885	0.99919	-4.40584
ENSG00000185880	TRIM69	tripartite motif containing 69 [Source:HGNC Symbol;Acc:HGNC:17857]	0.302457	2.99172	1.86522	0.0882727	0.99919	-4.38454
ENSG00000064763	FAR2	fatty acyl-CoA reductase 2 [Source:HGNC Symbol;Acc:HGNC:25531]	0.755294	0.573903	1.86476	0.0883426	0.99919	-4.49487
ENSG00000247315	ZCCHC3	zinc finger CCHC-type containing 3 [Source:HGNC Symbol;Acc:HGNC:16230]	-0.322998	5.00978	-1.86402	0.0884532	0.99919	-4.32271
ENSG00000196151	WDSUB1	WD repeat, sterile alpha motif and U-box domain containing 1 [Source:HGNC Symbol;Acc:HGNC:26697]	0.432148	1.71481	1.86388	0.088474	0.99919	-4.44514
ENSG00000072778	ACADVL	acyl-CoA dehydrogenase, very long chain [Source:HGNC Symbol;Acc:HGNC:92]	0.26955	6.81071	1.86329	0.0885623	0.99919	-4.30684
ENSG00000153558	FBXL2	F-box and leucine rich repeat protein 2 [Source:HGNC Symbol;Acc:HGNC:13598]	0.345281	2.56718	1.86225	0.088719	0.99919	-4.405
ENSG00000092841	MYL6	myosin light chain 6 [Source:HGNC Symbol;Acc:HGNC:7587]	0.320501	8.89571	1.86203	0.0887521	0.99919	-4.31812
ENSG00000153790	C7orf31	chromosome 7 open reading frame 31 [Source:HGNC Symbol;Acc:HGNC:21722]	0.677209	-0.143808	1.86171	0.0888013	0.99919	-4.52254
ENSG00000001461	NIPAL3	NIPA like domain containing 3 [Source:HGNC Symbol;Acc:HGNC:25233]	0.31086	3.25715	1.86149	0.0888337	0.99919	-4.37398
ENSG00000151929	BAG3	BCL2 associated athanogene 3 [Source:HGNC Symbol;Acc:HGNC:939]	0.462466	6.44085	1.86128	0.0888648	0.99919	-4.30764
ENSG00000145246	ATP10D	ATPase phospholipid transporting 10D (putative) [Source:HGNC Symbol;Acc:HGNC:13549]	0.410171	1.20544	1.85876	0.0892454	0.99919	-4.47123
ENSG00000182809	CRIP2	cysteine rich protein 2 [Source:HGNC Symbol;Acc:HGNC:2361]	0.660038	5.01851	1.85836	0.0893057	0.99919	-4.32059
ENSG00000174516	PELI3	pellino E3 ubiquitin protein ligase family member 3 [Source:HGNC Symbol;Acc:HGNC:30010]	0.370872	3.37833	1.85818	0.0893343	0.99919	-4.36954
ENSG00000149177	PTPRJ	protein tyrosine phosphatase, receptor type J [Source:HGNC Symbol;Acc:HGNC:9673]	0.252098	3.88032	1.85683	0.089538	0.99919	-4.3523
ENSG00000196118	CCDC189	coiled-coil domain containing 189 [Source:HGNC Symbol;Acc:HGNC:28078]	-0.45905	2.17155	-1.8563	0.0896187	0.99919	-4.43711
ENSG00000255517	NA	NA	0.499141	0.887921	1.85618	0.0896369	0.99919	-4.48566
ENSG00000232208	NA	NA	1.20598	-0.985036	1.85614	0.089643	0.99919	-4.54096
ENSG00000041988	THAP3	THAP domain containing 3 [Source:HGNC Symbol;Acc:HGNC:20855]	-0.29793	6.0697	-1.85613	0.0896447	0.99919	-4.31189
ENSG00000131188	PRR7	proline rich 7 (synaptic) [Source:HGNC Symbol;Acc:HGNC:28130]	-0.516548	6.72288	-1.85539	0.0897572	0.99919	-4.31032
ENSG00000121274	PAPD5	poly(A) RNA polymerase D5, non-canonical [Source:HGNC Symbol;Acc:HGNC:30758]	0.267616	6.20936	1.85526	0.0897771	0.99919	-4.31071
ENSG00000279059	NA	NA	-0.398616	1.38986	-1.85424	0.0899322	0.99919	-4.47277
ENSG00000135519	KCNH3	potassium voltage-gated channel subfamily H member 3 [Source:HGNC Symbol;Acc:HGNC:6252]	-0.625281	1.12825	-1.85378	0.090002	0.99919	-4.48844
ENSG00000154370	TRIM11	tripartite motif containing 11 [Source:HGNC Symbol;Acc:HGNC:16281]	-0.231725	6.60742	-1.85347	0.0900496	0.99919	-4.31085
ENSG00000183092	BEGAIN	brain enriched guanylate kinase associated [Source:HGNC Symbol;Acc:HGNC:24163]	-0.265846	5.70559	-1.85303	0.0901169	0.99919	-4.31619
ENSG00000103381	CPPED1	calcineurin like phosphoesterase domain containing 1 [Source:HGNC Symbol;Acc:HGNC:25632]	0.473046	1.58977	1.85254	0.0901919	0.99919	-4.45286
ENSG00000125746	EML2	echinoderm microtubule associated protein like 2 [Source:HGNC Symbol;Acc:HGNC:18035]	-0.55438	5.97979	-1.8508	0.0904575	0.99919	-4.31554
ENSG00000115541	HSPE1	heat shock protein family E (Hsp10) member 1 [Source:HGNC Symbol;Acc:HGNC:5269]	-0.276865	8.20234	-1.85069	0.090475	0.99919	-4.31726
ENSG00000126351	THRA	thyroid hormone receptor, alpha [Source:HGNC Symbol;Acc:HGNC:11796]	-0.235076	7.22717	-1.85023	0.0905452	0.99919	-4.31295
ENSG00000170525	PFKFB3	6-phosphofructo-2-kinase/fructose-2,6-biphosphatase 3 [Source:HGNC Symbol;Acc:HGNC:8874]	-0.283412	5.43356	-1.84992	0.0905923	0.99919	-4.32069
ENSG00000161791	FMNL3	formin like 3 [Source:HGNC Symbol;Acc:HGNC:23698]	-0.378447	2.57173	-1.8494	0.0906717	0.99919	-4.41727
ENSG00000063322	MED29	mediator complex subunit 29 [Source:HGNC Symbol;Acc:HGNC:23074]	0.250462	4.88219	1.84912	0.0907155	0.99919	-4.32793
ENSG00000245848	CEBPA	CCAAT/enhancer binding protein alpha [Source:HGNC Symbol;Acc:HGNC:1833]	-0.346714	4.93018	-1.84903	0.0907283	0.99919	-4.33052
ENSG00000171202	TMEM126A	transmembrane protein 126A [Source:HGNC Symbol;Acc:HGNC:25382]	0.342484	3.72024	1.8466	0.0911033	0.99919	-4.36058
ENSG00000242265	PEG10	paternally expressed 10 [Source:HGNC Symbol;Acc:HGNC:14005]	0.955716	0.679819	1.84625	0.091156	0.99919	-4.49227
ENSG00000233338	TLR8-AS1	TLR8 antisense RNA 1 [Source:HGNC Symbol;Acc:HGNC:40720]	0.431376	4.03416	1.84592	0.0912075	0.99919	-4.34976
ENSG00000107731	UNC5B	unc-5 netrin receptor B [Source:HGNC Symbol;Acc:HGNC:12568]	-0.441948	1.42261	-1.84577	0.0912306	0.99919	-4.47499
ENSG00000136158	SPRY2	sprouty RTK signaling antagonist 2 [Source:HGNC Symbol;Acc:HGNC:11270]	-0.673175	5.25674	-1.84551	0.0912708	0.99919	-4.32767
ENSG00000133069	TMCC2	transmembrane and coiled-coil domain family 2 [Source:HGNC Symbol;Acc:HGNC:24239]	0.541891	2.98701	1.84545	0.0912805	0.99919	-4.38821
ENSG00000167113	COQ4	coenzyme Q4 [Source:HGNC Symbol;Acc:HGNC:19693]	-0.24444	5.79644	-1.84428	0.0914607	0.99919	-4.31873
ENSG00000189143	CLDN4	claudin 4 [Source:HGNC Symbol;Acc:HGNC:2046]	0.326088	6.57241	1.84322	0.0916247	0.99919	-4.31489
ENSG00000109472	CPE	carboxypeptidase E [Source:HGNC Symbol;Acc:HGNC:2303]	0.539289	1.57694	1.84278	0.0916939	0.99919	-4.45465
ENSG00000272853	NA	NA	0.691268	-0.293564	1.84206	0.0918055	0.99919	-4.52736
ENSG00000138785	INTS12	integrator complex subunit 12 [Source:HGNC Symbol;Acc:HGNC:25067]	-0.250791	4.04163	-1.84205	0.0918062	0.99919	-4.35656
ENSG00000171163	ZNF692	zinc finger protein 692 [Source:HGNC Symbol;Acc:HGNC:26049]	-0.473745	4.66052	-1.84116	0.0919453	0.99919	-4.34071
ENSG00000129625	REEP5	receptor accessory protein 5 [Source:HGNC Symbol;Acc:HGNC:30077]	-0.251824	7.085	-1.84084	0.0919949	0.99919	-4.31639
ENSG00000223551	TMSB4XP4	thymosin beta 4, X-linked pseudogene 4 [Source:HGNC Symbol;Acc:HGNC:11886]	0.481158	5.32755	1.84071	0.0920153	0.99919	-4.32335
ENSG00000107872	FBXL15	F-box and leucine rich repeat protein 15 [Source:HGNC Symbol;Acc:HGNC:28155]	0.258387	3.45943	1.83875	0.0923209	0.99919	-4.37358
ENSG00000198856	OSTC	oligosaccharyltransferase complex non-catalytic subunit [Source:HGNC Symbol;Acc:HGNC:24448]	-0.294153	7.14393	-1.83808	0.0924256	0.99919	-4.31765
ENSG00000184470	TXNRD2	thioredoxin reductase 2 [Source:HGNC Symbol;Acc:HGNC:18155]	0.309386	3.90528	1.83757	0.092504	0.99919	-4.3578
ENSG00000101265	RASSF2	Ras association domain family member 2 [Source:HGNC Symbol;Acc:HGNC:9883]	-0.429553	2.56768	-1.8374	0.0925314	0.99919	-4.42238
ENSG00000235175	RPL26P37	ribosomal protein L26 pseudogene 37 [Source:HGNC Symbol;Acc:HGNC:36004]	0.261346	4.10279	1.83666	0.0926468	0.99919	-4.35207
ENSG00000137267	TUBB2A	tubulin beta 2A class IIa [Source:HGNC Symbol;Acc:HGNC:12412]	0.456442	7.83357	1.83666	0.0926472	0.99919	-4.32184
ENSG00000085491	SLC25A24	solute carrier family 25 member 24 [Source:HGNC Symbol;Acc:HGNC:20662]	-0.348941	5.75681	-1.83602	0.0927478	0.99919	-4.32278
ENSG00000248794	NA	NA	0.516709	1.26282	1.83599	0.0927522	0.99919	-4.47221
ENSG00000164008	C1orf50	chromosome 1 open reading frame 50 [Source:HGNC Symbol;Acc:HGNC:28795]	-0.334352	2.47635	-1.8356	0.092813	0.99919	-4.4247
ENSG00000143702	CEP170	centrosomal protein 170 [Source:HGNC Symbol;Acc:HGNC:28920]	-0.30434	4.29804	-1.83484	0.0929315	0.99919	-4.3515
ENSG00000168061	SAC3D1	SAC3 domain containing 1 [Source:HGNC Symbol;Acc:HGNC:30179]	0.514054	6.82847	1.83464	0.092963	0.99919	-4.31886
ENSG00000161203	AP2M1	adaptor related protein complex 2 mu 1 subunit [Source:HGNC Symbol;Acc:HGNC:564]	0.333129	6.39282	1.83382	0.0930918	0.99919	-4.31894
ENSG00000185163	DDX51	DEAD-box helicase 51 [Source:HGNC Symbol;Acc:HGNC:20082]	-0.306568	4.80959	-1.83366	0.0931183	0.99919	-4.33859
ENSG00000187601	MAGEH1	MAGE family member H1 [Source:HGNC Symbol;Acc:HGNC:24092]	0.281257	4.64171	1.83282	0.0932494	0.99919	-4.33904
ENSG00000092445	TYRO3	TYRO3 protein tyrosine kinase [Source:HGNC Symbol;Acc:HGNC:12446]	-0.376985	4.36541	-1.8326	0.0932843	0.99919	-4.35092
ENSG00000273432	NA	NA	0.740294	-0.656946	1.83172	0.0934227	0.99919	-4.53743
ENSG00000135338	LCA5	LCA5, lebercilin [Source:HGNC Symbol;Acc:HGNC:31923]	0.775403	-0.334352	1.8312	0.0935047	0.99919	-4.52933
ENSG00000087470	DNM1L	dynamin 1 like [Source:HGNC Symbol;Acc:HGNC:2973]	-0.292137	6.46583	-1.83074	0.0935779	0.99919	-4.32048
ENSG00000170035	UBE2E3	ubiquitin conjugating enzyme E2 E3 [Source:HGNC Symbol;Acc:HGNC:12479]	0.243293	7.97618	1.82996	0.0937006	0.99919	-4.32501
ENSG00000164877	MICALL2	MICAL like 2 [Source:HGNC Symbol;Acc:HGNC:29672]	0.256871	4.11366	1.82959	0.0937594	0.99919	-4.35448
ENSG00000104765	BNIP3L	BCL2 interacting protein 3 like [Source:HGNC Symbol;Acc:HGNC:1085]	0.328416	5.50365	1.82871	0.0938988	0.99919	-4.32636
ENSG00000084072	PPIE	peptidylprolyl isomerase E [Source:HGNC Symbol;Acc:HGNC:9258]	-0.231428	5.09926	-1.8284	0.0939488	0.99919	-4.33414
ENSG00000164125	FAM198B	family with sequence similarity 198 member B [Source:HGNC Symbol;Acc:HGNC:25312]	0.414078	4.84898	1.82819	0.093981	0.99919	-4.33594
ENSG00000182158	CREB3L2	cAMP responsive element binding protein 3 like 2 [Source:HGNC Symbol;Acc:HGNC:23720]	0.326964	3.65472	1.82814	0.0939894	0.99919	-4.36928
ENSG00000163485	ADORA1	adenosine A1 receptor [Source:HGNC Symbol;Acc:HGNC:262]	-0.349722	3.89723	-1.82805	0.0940041	0.99919	-4.3671
ENSG00000169895	SYAP1	synapse associated protein 1 [Source:HGNC Symbol;Acc:HGNC:16273]	0.205602	6.81522	1.82781	0.0940412	0.99919	-4.32137
ENSG00000204540	PSORS1C1	psoriasis susceptibility 1 candidate 1 [Source:HGNC Symbol;Acc:HGNC:17202]	-0.778031	2.39271	-1.82698	0.0941741	0.99919	-4.43732
ENSG00000134046	MBD2	methyl-CpG binding domain protein 2 [Source:HGNC Symbol;Acc:HGNC:6917]	0.511025	3.03373	1.82674	0.0942118	0.99919	-4.39183
ENSG00000116254	CHD5	chromodomain helicase DNA binding protein 5 [Source:HGNC Symbol;Acc:HGNC:16816]	-0.633763	2.9824	-1.82609	0.0943153	0.99919	-4.40901
ENSG00000143162	CREG1	cellular repressor of E1A stimulated genes 1 [Source:HGNC Symbol;Acc:HGNC:2351]	0.332024	5.98534	1.82606	0.0943196	0.99919	-4.32364
ENSG00000166685	COG1	component of oligomeric golgi complex 1 [Source:HGNC Symbol;Acc:HGNC:6545]	0.274628	4.38959	1.82548	0.0944119	0.99919	-4.34789
ENSG00000172590	MRPL52	mitochondrial ribosomal protein L52 [Source:HGNC Symbol;Acc:HGNC:16655]	0.348915	6.25506	1.82544	0.0944192	0.99919	-4.32273
ENSG00000135451	TROAP	trophinin associated protein [Source:HGNC Symbol;Acc:HGNC:12327]	-0.279531	5.39011	-1.8252	0.0944566	0.99919	-4.33113
ENSG00000042317	SPATA7	spermatogenesis associated 7 [Source:HGNC Symbol;Acc:HGNC:20423]	0.452794	1.27102	1.82517	0.0944618	0.99919	-4.473
ENSG00000140374	ETFA	electron transfer flavoprotein alpha subunit [Source:HGNC Symbol;Acc:HGNC:3481]	-0.285008	7.94411	-1.82458	0.0945553	0.99919	-4.32632
ENSG00000204392	LSM2	LSM2 homolog, U6 small nuclear RNA and mRNA degradation associated [Source:HGNC Symbol;Acc:HGNC:13940]	0.260142	7.55626	1.8245	0.0945684	0.99919	-4.32508
ENSG00000149357	LAMTOR1	late endosomal/lysosomal adaptor, MAPK and MTOR activator 1 [Source:HGNC Symbol;Acc:HGNC:26068]	-0.220623	7.06205	-1.82397	0.0946529	0.99919	-4.32325
ENSG00000184916	JAG2	jagged 2 [Source:HGNC Symbol;Acc:HGNC:6189]	-0.22882	5.49755	-1.82359	0.0947142	0.99919	-4.33011
ENSG00000074800	ENO1	enolase 1 [Source:HGNC Symbol;Acc:HGNC:3350]	0.343794	10.4101	1.82343	0.0947391	0.99919	-4.34265
ENSG00000124813	RUNX2	runt related transcription factor 2 [Source:HGNC Symbol;Acc:HGNC:10472]	-0.398944	2.8413	-1.82338	0.0947464	0.99919	-4.41136
ENSG00000123080	CDKN2C	cyclin dependent kinase inhibitor 2C [Source:HGNC Symbol;Acc:HGNC:1789]	0.272083	4.5607	1.82298	0.0948114	0.99919	-4.34468
ENSG00000196358	NTNG2	netrin G2 [Source:HGNC Symbol;Acc:HGNC:14288]	-0.585801	1.85999	-1.82257	0.0948771	0.99919	-4.45919
ENSG00000258768	NA	NA	0.620415	0.661011	1.82249	0.0948896	0.99919	-4.49806
ENSG00000163430	FSTL1	follistatin like 1 [Source:HGNC Symbol;Acc:HGNC:3972]	-0.364712	4.75749	-1.82239	0.0949046	0.99919	-4.34442
ENSG00000213757	NA	NA	0.794164	-0.146764	1.82224	0.094929	0.99919	-4.52527
ENSG00000198668	CALM1	calmodulin 1 [Source:HGNC Symbol;Acc:HGNC:1442]	0.3428	9.1807	1.82198	0.0949714	0.99919	-4.33563
ENSG00000175183	CSRP2	cysteine and glycine rich protein 2 [Source:HGNC Symbol;Acc:HGNC:2470]	0.389043	1.38238	1.82159	0.0950334	0.99919	-4.46963
ENSG00000205544	TMEM256	transmembrane protein 256 [Source:HGNC Symbol;Acc:HGNC:28618]	-0.316274	7.47112	-1.82129	0.0950808	0.99919	-4.32556
ENSG00000168096	ANKS3	ankyrin repeat and sterile alpha motif domain containing 3 [Source:HGNC Symbol;Acc:HGNC:29422]	-0.265038	3.99794	-1.82113	0.0951064	0.99919	-4.36517
ENSG00000187239	FNBP1	formin binding protein 1 [Source:HGNC Symbol;Acc:HGNC:17069]	-0.240521	6.88904	-1.8205	0.0952076	0.99919	-4.3244
ENSG00000213614	HEXA	hexosaminidase subunit alpha [Source:HGNC Symbol;Acc:HGNC:4878]	0.339773	5.56071	1.81888	0.0954679	0.99919	-4.32966
ENSG00000127184	COX7C	cytochrome c oxidase subunit 7C [Source:HGNC Symbol;Acc:HGNC:2292]	0.315944	8.97493	1.81888	0.0954683	0.99919	-4.33553
ENSG00000163584	RPL22L1	ribosomal protein L22 like 1 [Source:HGNC Symbol;Acc:HGNC:27610]	0.399976	6.7662	1.81867	0.0955014	0.99919	-4.32517
ENSG00000180626	ZNF594	zinc finger protein 594 [Source:HGNC Symbol;Acc:HGNC:29392]	-0.400228	2.68708	-1.81789	0.0956279	0.99919	-4.4204
ENSG00000185010	F8	coagulation factor VIII [Source:HGNC Symbol;Acc:HGNC:3546]	0.446097	2.20368	1.81777	0.0956472	0.99919	-4.43134
ENSG00000105245	NUMBL	NUMB like, endocytic adaptor protein [Source:HGNC Symbol;Acc:HGNC:8061]	-0.304485	6.44059	-1.81755	0.0956821	0.99919	-4.32596
ENSG00000176946	THAP4	THAP domain containing 4 [Source:HGNC Symbol;Acc:HGNC:23187]	-0.284432	6.79043	-1.81731	0.0957215	0.99919	-4.32565
ENSG00000237886	NALT1	NOTCH1 associated lncRNA in T-cell acute lymphoblastic leukemia 1 [Source:HGNC Symbol;Acc:HGNC:51192]	0.586745	0.616164	1.817	0.0957715	0.99919	-4.50193
ENSG00000107290	SETX	senataxin [Source:HGNC Symbol;Acc:HGNC:445]	-0.29103	5.8769	-1.81625	0.0958922	0.99919	-4.32949
ENSG00000159685	CHCHD6	coiled-coil-helix-coiled-coil-helix domain containing 6 [Source:HGNC Symbol;Acc:HGNC:28184]	0.267675	3.33659	1.81614	0.0959104	0.99919	-4.38535
ENSG00000108604	SMARCD2	SWI/SNF related, matrix associated, actin dependent regulator of chromatin, subfamily d, member 2 [Source:HGNC Symbol;Acc:HGNC:11107]	-0.56176	7.30692	-1.81602	0.0959288	0.99919	-4.32704
ENSG00000161714	PLCD3	phospholipase C delta 3 [Source:HGNC Symbol;Acc:HGNC:9061]	-0.244332	6.12662	-1.8159	0.0959495	0.99919	-4.32778
ENSG00000272662	NA	NA	0.550841	-0.0902302	1.81574	0.0959748	0.99919	-4.52504
ENSG00000008988	RPS20	ribosomal protein S20 [Source:HGNC Symbol;Acc:HGNC:10405]	0.286516	11.4713	1.81544	0.0960232	0.99919	-4.35196
ENSG00000161036	LRWD1	leucine rich repeats and WD repeat domain containing 1 [Source:HGNC Symbol;Acc:HGNC:21769]	-0.701599	3.3995	-1.8148	0.0961262	0.99919	-4.39458
ENSG00000111875	ASF1A	anti-silencing function 1A histone chaperone [Source:HGNC Symbol;Acc:HGNC:20995]	0.356541	3.0082	1.81479	0.0961291	0.99919	-4.39793
ENSG00000108064	TFAM	transcription factor A, mitochondrial [Source:HGNC Symbol;Acc:HGNC:11741]	-0.308417	6.57184	-1.81417	0.0962292	0.99919	-4.3271
ENSG00000182179	UBA7	ubiquitin like modifier activating enzyme 7 [Source:HGNC Symbol;Acc:HGNC:12471]	0.559784	2.78768	1.81413	0.0962359	0.99919	-4.40528
ENSG00000141441	GAREM1	GRB2 associated regulator of MAPK1 subtype 1 [Source:HGNC Symbol;Acc:HGNC:26136]	0.447982	1.65799	1.81384	0.0962815	0.99919	-4.45768
ENSG00000204569	PPP1R10	protein phosphatase 1 regulatory subunit 10 [Source:HGNC Symbol;Acc:HGNC:9284]	-0.366415	6.42992	-1.81333	0.0963648	0.99919	-4.32781
ENSG00000177692	DNAJC28	DnaJ heat shock protein family (Hsp40) member C28 [Source:HGNC Symbol;Acc:HGNC:1297]	0.531882	0.788077	1.81266	0.096473	0.99919	-4.49519
ENSG00000278514	NA	NA	0.861365	-0.865231	1.81257	0.096488	0.99919	-4.54374
ENSG00000187626	ZKSCAN4	zinc finger with KRAB and SCAN domains 4 [Source:HGNC Symbol;Acc:HGNC:13854]	0.327893	4.14424	1.81227	0.0965376	0.99919	-4.35896
ENSG00000099954	CECR2	CECR2, histone acetyl-lysine reader [Source:HGNC Symbol;Acc:HGNC:1840]	-0.330247	4.02295	-1.81153	0.0966575	0.99919	-4.36826
ENSG00000198763	MT-ND2	mitochondrially encoded NADH:ubiquinone oxidoreductase core subunit 2 [Source:HGNC Symbol;Acc:HGNC:7456]	-0.341613	10.7587	-1.81143	0.0966739	0.99919	-4.34821
ENSG00000163608	NEPRO	nucleolus and neural progenitor protein [Source:HGNC Symbol;Acc:HGNC:24496]	0.232957	5.47282	1.81045	0.096834	0.99919	-4.33415
ENSG00000196636	SDHAF3	succinate dehydrogenase complex assembly factor 3 [Source:HGNC Symbol;Acc:HGNC:21752]	0.320734	2.9833	1.8102	0.0968735	0.99919	-4.40057
ENSG00000274602	PI4KAP1	phosphatidylinositol 4-kinase alpha pseudogene 1 [Source:HGNC Symbol;Acc:HGNC:33576]	0.472922	1.56117	1.81018	0.0968776	0.99919	-4.46246
ENSG00000172534	HCFC1	host cell factor C1 [Source:HGNC Symbol;Acc:HGNC:4839]	-0.283054	7.81554	-1.80965	0.0969637	0.99919	-4.33171
ENSG00000167595	PROSER3	proline and serine rich 3 [Source:HGNC Symbol;Acc:HGNC:25204]	-0.254504	5.88743	-1.80921	0.097035	0.99919	-4.33215
ENSG00000168246	UBTD2	ubiquitin domain containing 2 [Source:HGNC Symbol;Acc:HGNC:24463]	-0.320277	5.20425	-1.80843	0.0971626	0.99919	-4.3406
ENSG00000106133	NSUN5P2	NOP2/Sun RNA methyltransferase family member 5 pseudogene 2 [Source:HGNC Symbol;Acc:HGNC:16609]	-0.237776	4.98388	-1.80749	0.0973164	0.99919	-4.34431
ENSG00000198663	C6orf89	chromosome 6 open reading frame 89 [Source:HGNC Symbol;Acc:HGNC:21114]	0.224447	6.93608	1.80725	0.0973566	0.99919	-4.33005
ENSG00000111912	NCOA7	nuclear receptor coactivator 7 [Source:HGNC Symbol;Acc:HGNC:21081]	-0.334363	5.51518	-1.80712	0.0973773	0.99919	-4.3369
ENSG00000157992	KRTCAP3	keratinocyte associated protein 3 [Source:HGNC Symbol;Acc:HGNC:28943]	0.358398	2.352	1.80645	0.0974872	0.99919	-4.42845
ENSG00000184492	FOXD4L1	forkhead box D4-like 1 [Source:HGNC Symbol;Acc:HGNC:18521]	0.778999	-0.88118	1.80577	0.0975982	0.99919	-4.54465
ENSG00000241764	NA	NA	0.492539	0.580705	1.80501	0.0977227	0.99919	-4.50468
ENSG00000234771	SLC25A25-AS1	SLC25A25 antisense RNA 1 [Source:HGNC Symbol;Acc:HGNC:27844]	-0.400912	3.84889	-1.80467	0.09778	0.99919	-4.37742
ENSG00000198752	CDC42BPB	CDC42 binding protein kinase beta [Source:HGNC Symbol;Acc:HGNC:1738]	0.267869	6.04249	1.80439	0.097826	0.99919	-4.33221
ENSG00000118245	TNP1	transition protein 1 [Source:HGNC Symbol;Acc:HGNC:11951]	1.91043	-2.56941	1.80378	0.0979263	0.99919	-4.56409
ENSG00000247400	DNAJC3-AS1	DNAJC3 antisense RNA 1 (head to head) [Source:HGNC Symbol;Acc:HGNC:39808]	0.410538	2.74876	1.80344	0.0979811	0.99919	-4.41155
ENSG00000167528	ZNF641	zinc finger protein 641 [Source:HGNC Symbol;Acc:HGNC:31834]	-0.516747	0.979005	-1.80336	0.0979951	0.99919	-4.4987
ENSG00000148296	SURF6	surfeit 6 [Source:HGNC Symbol;Acc:HGNC:11478]	-0.252556	6.78107	-1.80124	0.0983449	0.99919	-4.3322
ENSG00000142227	EMP3	epithelial membrane protein 3 [Source:HGNC Symbol;Acc:HGNC:3335]	0.355558	4.28532	1.80114	0.0983607	0.99919	-4.3589
ENSG00000260095	NA	NA	-0.591603	1.20647	-1.80016	0.0985237	0.99919	-4.49332
ENSG00000198408	MGEA5	meningioma expressed antigen 5 (hyaluronidase) [Source:HGNC Symbol;Acc:HGNC:7056]	-0.266978	8.28839	-1.79979	0.0985843	0.99919	-4.33813
ENSG00000142949	PTPRF	protein tyrosine phosphatase, receptor type F [Source:HGNC Symbol;Acc:HGNC:9670]	0.409292	8.91229	1.79905	0.0987072	0.99919	-4.34302
ENSG00000153933	DGKE	diacylglycerol kinase epsilon [Source:HGNC Symbol;Acc:HGNC:2852]	-0.366601	5.56735	-1.7988	0.0987487	0.99919	-4.33977
ENSG00000270231	NBPF8	neuroblastoma breakpoint family member 8 [Source:HGNC Symbol;Acc:HGNC:31990]	-0.487168	1.24355	-1.79833	0.0988262	0.99919	-4.48971
ENSG00000176371	ZSCAN2	zinc finger and SCAN domain containing 2 [Source:HGNC Symbol;Acc:HGNC:20994]	0.279301	2.59557	1.79832	0.0988274	0.99919	-4.42048
ENSG00000179240	NA	NA	0.5978	1.26851	1.79806	0.0988716	0.99919	-4.47847
ENSG00000273448	NA	NA	0.434241	0.479367	1.79779	0.0989155	0.99919	-4.50956
ENSG00000155158	TTC39B	tetratricopeptide repeat domain 39B [Source:HGNC Symbol;Acc:HGNC:23704]	0.287116	4.29416	1.79771	0.0989296	0.99919	-4.36053
ENSG00000109118	PHF12	PHD finger protein 12 [Source:HGNC Symbol;Acc:HGNC:20816]	-0.232677	4.1224	-1.79719	0.0990157	0.99919	-4.36906
ENSG00000090316	MAEA	macrophage erythroblast attacher [Source:HGNC Symbol;Acc:HGNC:13731]	-0.263523	6.03906	-1.79674	0.0990902	0.99919	-4.33612
ENSG00000006015	C19orf60	chromosome 19 open reading frame 60 [Source:HGNC Symbol;Acc:HGNC:26098]	0.347513	5.19146	1.79579	0.0992495	0.99919	-4.34312
ENSG00000116095	PLEKHA3	pleckstrin homology domain containing A3 [Source:HGNC Symbol;Acc:HGNC:14338]	-0.263461	4.30835	-1.79545	0.0993051	0.99919	-4.36465
ENSG00000050438	SLC4A8	solute carrier family 4 member 8 [Source:HGNC Symbol;Acc:HGNC:11034]	-0.360195	2.73632	-1.79528	0.0993341	0.99919	-4.42274
ENSG00000108587	GOSR1	golgi SNAP receptor complex member 1 [Source:HGNC Symbol;Acc:HGNC:4430]	-0.290321	5.13672	-1.79522	0.0993434	0.99919	-4.34665
ENSG00000243960	NA	NA	-0.536814	0.304481	-1.79486	0.0994042	0.99919	-4.52418
ENSG00000268896	NA	NA	-0.845107	-0.837652	-1.79436	0.099488	0.99919	-4.55132
ENSG00000250899	NA	NA	-0.376531	3.02225	-1.79397	0.0995524	0.99919	-4.41106
ENSG00000085514	PILRA	paired immunoglobin like type 2 receptor alpha [Source:HGNC Symbol;Acc:HGNC:20396]	-0.528093	0.680906	-1.79251	0.0997974	0.99919	-4.51172
ENSG00000127463	EMC1	ER membrane protein complex subunit 1 [Source:HGNC Symbol;Acc:HGNC:28957]	0.233819	6.46221	1.79236	0.0998228	0.99919	-4.33578
ENSG00000104164	BLOC1S6	biogenesis of lysosomal organelles complex 1 subunit 6 [Source:HGNC Symbol;Acc:HGNC:8549]	0.238447	4.7214	1.79197	0.0998878	0.99919	-4.35296
ENSG00000122687	MRM2	mitochondrial rRNA methyltransferase 2 [Source:HGNC Symbol;Acc:HGNC:16352]	-0.254424	5.55596	-1.79184	0.0999088	0.99919	-4.34217
ENSG00000175567	UCP2	uncoupling protein 2 [Source:HGNC Symbol;Acc:HGNC:12518]	0.465474	2.55939	1.79096	0.100056	0.99919	-4.42223
ENSG00000229425	NA	NA	-0.555992	0.491405	-1.79016	0.100191	0.99919	-4.51978
ENSG00000156427	FGF18	fibroblast growth factor 18 [Source:HGNC Symbol;Acc:HGNC:3674]	0.517146	0.965397	1.79011	0.1002	0.99919	-4.49181
ENSG00000126878	AIF1L	allograft inflammatory factor 1 like [Source:HGNC Symbol;Acc:HGNC:28904]	-0.326249	4.67586	-1.78988	0.100238	0.99919	-4.358
ENSG00000166974	MAPRE2	microtubule associated protein RP/EB family member 2 [Source:HGNC Symbol;Acc:HGNC:6891]	-0.777451	0.197508	-1.78969	0.100271	0.99919	-4.53087
ENSG00000267249	NA	NA	-0.774972	0.0565156	-1.78878	0.100424	0.99919	-4.53439
ENSG00000101000	PROCR	protein C receptor [Source:HGNC Symbol;Acc:HGNC:9452]	0.445554	4.4768	1.78859	0.100455	0.99919	-4.35843
ENSG00000119686	FLVCR2	feline leukemia virus subgroup C cellular receptor family member 2 [Source:HGNC Symbol;Acc:HGNC:20105]	0.552321	1.71904	1.78827	0.100509	0.99919	-4.45888
ENSG00000164362	TERT	telomerase reverse transcriptase [Source:HGNC Symbol;Acc:HGNC:11730]	-0.958847	0.269641	-1.78811	0.100536	0.99919	-4.52938
ENSG00000278743	NA	NA	-0.674789	2.50456	-1.78719	0.100691	0.99919	-4.4387
ENSG00000080608	PUM3	pumilio RNA binding family member 3 [Source:HGNC Symbol;Acc:HGNC:29676]	-0.366123	6.14672	-1.78603	0.100888	0.99919	-4.34005
ENSG00000171604	CXXC5	CXXC finger protein 5 [Source:HGNC Symbol;Acc:HGNC:26943]	-0.304029	4.42567	-1.7858	0.100927	0.99919	-4.36541
ENSG00000205302	SNX2	sorting nexin 2 [Source:HGNC Symbol;Acc:HGNC:11173]	0.249381	5.08139	1.78505	0.101054	0.99919	-4.34921
ENSG00000069399	BCL3	B-cell CLL/lymphoma 3 [Source:HGNC Symbol;Acc:HGNC:998]	-0.434896	5.06519	-1.78485	0.101087	0.99919	-4.35285
ENSG00000198858	R3HDM4	R3H domain containing 4 [Source:HGNC Symbol;Acc:HGNC:28270]	-0.457327	6.09695	-1.78432	0.101177	0.99919	-4.34125
ENSG00000110711	AIP	aryl hydrocarbon receptor interacting protein [Source:HGNC Symbol;Acc:HGNC:358]	0.368442	4.13395	1.78408	0.101219	0.99919	-4.36899
ENSG00000168209	DDIT4	DNA damage inducible transcript 4 [Source:HGNC Symbol;Acc:HGNC:24944]	0.3222	7.11781	1.78361	0.101297	0.99919	-4.3402
ENSG00000163389	POGLUT1	protein O-glucosyltransferase 1 [Source:HGNC Symbol;Acc:HGNC:22954]	0.285749	3.98566	1.78317	0.101371	0.99919	-4.37392
ENSG00000179673	RPRML	reprimo like [Source:HGNC Symbol;Acc:HGNC:32422]	-0.410462	2.40844	-1.78215	0.101546	0.99919	-4.44134
ENSG00000106785	TRIM14	tripartite motif containing 14 [Source:HGNC Symbol;Acc:HGNC:16283]	-0.354329	3.0583	-1.78197	0.101577	0.99919	-4.4124
ENSG00000275180	NA	NA	0.264537	4.97014	1.78175	0.101614	0.99919	-4.35216
ENSG00000272367	NA	NA	-0.515811	0.617124	-1.78156	0.101646	0.99919	-4.5146
ENSG00000254837	NA	NA	0.420929	1.26029	1.78084	0.101769	0.99919	-4.48126
ENSG00000107874	CUEDC2	CUE domain containing 2 [Source:HGNC Symbol;Acc:HGNC:28352]	0.355839	3.42949	1.78029	0.101862	0.99919	-4.39211
ENSG00000166813	KIF7	kinesin family member 7 [Source:HGNC Symbol;Acc:HGNC:30497]	-0.457466	2.76982	-1.78029	0.101862	0.99919	-4.42783
ENSG00000168781	PPIP5K1	diphosphoinositol pentakisphosphate kinase 1 [Source:HGNC Symbol;Acc:HGNC:29023]	-0.767431	1.88918	-1.77896	0.10209	0.99919	-4.4679
ENSG00000223745	CCDC18-AS1	CCDC18 antisense RNA 1 [Source:HGNC Symbol;Acc:HGNC:52262]	0.287235	4.55512	1.77862	0.102148	0.99919	-4.36109
ENSG00000185298	CCDC137	coiled-coil domain containing 137 [Source:HGNC Symbol;Acc:HGNC:33451]	-0.332137	4.90139	-1.77841	0.102183	0.99919	-4.35764
ENSG00000236753	MKLN1-AS	MKLN1 antisense RNA [Source:HGNC Symbol;Acc:HGNC:40374]	0.673347	-0.814545	1.77835	0.102193	0.99919	-4.54596
ENSG00000165887	ANKRD2	ankyrin repeat domain 2 [Source:HGNC Symbol;Acc:HGNC:495]	0.663347	3.21771	1.77834	0.102195	0.99919	-4.39849
ENSG00000021574	SPAST	spastin [Source:HGNC Symbol;Acc:HGNC:11233]	-0.285647	5.02136	-1.77834	0.102196	0.99919	-4.35513
ENSG00000105767	CADM4	cell adhesion molecule 4 [Source:HGNC Symbol;Acc:HGNC:30825]	-0.656771	2.89696	-1.77803	0.102249	0.99919	-4.42357
ENSG00000184371	CSF1	colony stimulating factor 1 [Source:HGNC Symbol;Acc:HGNC:2432]	0.334509	5.47698	1.77794	0.102264	0.99919	-4.34687
ENSG00000160691	SHC1	SHC adaptor protein 1 [Source:HGNC Symbol;Acc:HGNC:10840]	-0.229227	7.47165	-1.77769	0.102306	0.99919	-4.34329
ENSG00000166848	TERF2IP	TERF2 interacting protein [Source:HGNC Symbol;Acc:HGNC:19246]	-0.267512	6.91777	-1.77746	0.102347	0.99919	-4.342
ENSG00000138119	MYOF	myoferlin [Source:HGNC Symbol;Acc:HGNC:3656]	0.33236	5.51926	1.77729	0.102376	0.99919	-4.34669
ENSG00000075142	SRI	sorcin [Source:HGNC Symbol;Acc:HGNC:11292]	-0.263427	6.85189	-1.77713	0.102402	0.99919	-4.34208
ENSG00000189223	PAX8-AS1	PAX8 antisense RNA 1 [Source:HGNC Symbol;Acc:HGNC:49271]	0.412567	3.20086	1.77697	0.102431	0.99919	-4.40074
ENSG00000245532	NEAT1	nuclear paraspeckle assembly transcript 1 (non-protein coding) [Source:HGNC Symbol;Acc:HGNC:30815]	0.301567	10.4577	1.77643	0.102522	0.99919	-4.36044
ENSG00000142694	EVA1B	eva-1 homolog B [Source:HGNC Symbol;Acc:HGNC:25558]	0.368354	2.7669	1.77638	0.102532	0.99919	-4.41886
ENSG00000109107	ALDOC	aldolase, fructose-bisphosphate C [Source:HGNC Symbol;Acc:HGNC:418]	0.686173	1.07619	1.77586	0.102622	0.99919	-4.48801
ENSG00000136068	FLNB	filamin B [Source:HGNC Symbol;Acc:HGNC:3755]	0.252865	7.9118	1.77543	0.102695	0.99919	-4.34655
ENSG00000147471	PROSC	proline synthetase cotranscribed homolog (bacterial) [Source:HGNC Symbol;Acc:HGNC:9457]	-0.318078	5.07686	-1.77524	0.102727	0.99919	-4.35556
ENSG00000065802	ASB1	ankyrin repeat and SOCS box containing 1 [Source:HGNC Symbol;Acc:HGNC:16011]	-0.299062	6.00617	-1.77475	0.102812	0.99919	-4.34526
ENSG00000078808	SDF4	stromal cell derived factor 4 [Source:HGNC Symbol;Acc:HGNC:24188]	0.44072	8.84819	1.77414	0.102916	0.99919	-4.35242
ENSG00000243680	RPL37P23	ribosomal protein L37 pseudogene 23 [Source:HGNC Symbol;Acc:HGNC:37003]	0.537868	1.06324	1.77399	0.102943	0.99919	-4.49036
ENSG00000177628	GBA	glucosylceramidase beta [Source:HGNC Symbol;Acc:HGNC:4177]	0.578826	0.831707	1.77395	0.102949	0.99919	-4.498
ENSG00000182013	PNMAL1	paraneoplastic Ma antigen family like 1 [Source:HGNC Symbol;Acc:HGNC:25578]	0.517194	2.63212	1.77331	0.10306	0.99919	-4.42319
ENSG00000214022	REPIN1	replication initiator 1 [Source:HGNC Symbol;Acc:HGNC:17922]	0.363328	5.40548	1.77328	0.103064	0.99919	-4.34937
ENSG00000157890	MEGF11	multiple EGF like domains 11 [Source:HGNC Symbol;Acc:HGNC:29635]	-0.336799	2.25717	-1.77321	0.103076	0.99919	-4.44927
ENSG00000122026	RPL21	ribosomal protein L21 [Source:HGNC Symbol;Acc:HGNC:10313]	0.431237	1.30017	1.77254	0.103192	0.99919	-4.48145
ENSG00000126756	UXT	ubiquitously expressed prefoldin like chaperone [Source:HGNC Symbol;Acc:HGNC:12641]	0.321731	5.20128	1.77194	0.103295	0.99919	-4.35241
ENSG00000163755	HPS3	HPS3, biogenesis of lysosomal organelles complex 2 subunit 1 [Source:HGNC Symbol;Acc:HGNC:15597]	0.286143	3.33107	1.7711	0.103442	0.99919	-4.39903
ENSG00000198589	LRBA	LPS responsive beige-like anchor protein [Source:HGNC Symbol;Acc:HGNC:1742]	-0.331652	5.30609	-1.77074	0.103504	0.99919	-4.35386
ENSG00000184185	KCNJ12	potassium voltage-gated channel subfamily J member 12 [Source:HGNC Symbol;Acc:HGNC:6258]	0.424928	3.94262	1.77053	0.103539	0.99919	-4.37869
ENSG00000126005	MMP24-AS1	MMP24 antisense RNA 1 [Source:HGNC Symbol;Acc:HGNC:44421]	0.347048	6.32507	1.76981	0.103665	0.99919	-4.34523
ENSG00000226476	LINC01748	NA	0.326469	1.91319	1.7696	0.103702	0.99919	-4.45633
ENSG00000111786	SRSF9	serine and arginine rich splicing factor 9 [Source:HGNC Symbol;Acc:HGNC:10791]	-0.359145	5.88541	-1.76885	0.103832	0.99919	-4.34867
ENSG00000153208	MERTK	MER proto-oncogene, tyrosine kinase [Source:HGNC Symbol;Acc:HGNC:7027]	-0.394527	2.28071	-1.76884	0.103832	0.99919	-4.45012
ENSG00000090924	PLEKHG2	pleckstrin homology and RhoGEF domain containing G2 [Source:HGNC Symbol;Acc:HGNC:29515]	-0.278799	3.74469	-1.76883	0.103834	0.99919	-4.39075
ENSG00000135837	CEP350	centrosomal protein 350 [Source:HGNC Symbol;Acc:HGNC:24238]	-0.422912	6.81851	-1.76869	0.10386	0.99919	-4.3456
ENSG00000170471	RALGAPB	Ral GTPase activating protein non-catalytic beta subunit [Source:HGNC Symbol;Acc:HGNC:29221]	-0.230584	5.55602	-1.76761	0.104046	0.99919	-4.35167
ENSG00000130038	CRACR2A	calcium release activated channel regulator 2A [Source:HGNC Symbol;Acc:HGNC:28657]	0.262161	3.37499	1.76752	0.104062	0.99919	-4.3989
ENSG00000154309	DISP1	dispatched RND transporter family member 1 [Source:HGNC Symbol;Acc:HGNC:19711]	0.554975	3.03196	1.76748	0.104069	0.99919	-4.40902
ENSG00000241475	NA	NA	-0.335417	2.58175	-1.76722	0.104115	0.99919	-4.43581
ENSG00000140694	PARN	poly(A)-specific ribonuclease [Source:HGNC Symbol;Acc:HGNC:8609]	0.368937	5.1214	1.76656	0.10423	0.99919	-4.35545
ENSG00000026652	AGPAT4	1-acylglycerol-3-phosphate O-acyltransferase 4 [Source:HGNC Symbol;Acc:HGNC:20885]	0.300511	4.24221	1.76625	0.104283	0.99919	-4.37284
ENSG00000174276	ZNHIT2	zinc finger HIT-type containing 2 [Source:HGNC Symbol;Acc:HGNC:1177]	0.373553	2.71603	1.76529	0.104451	0.99919	-4.42361
ENSG00000215421	ZNF407	zinc finger protein 407 [Source:HGNC Symbol;Acc:HGNC:19904]	-0.296549	3.2971	-1.76459	0.104573	0.99919	-4.40801
ENSG00000239569	KMT2E-AS1	KMT2E antisense RNA 1 (head to head) [Source:HGNC Symbol;Acc:HGNC:40845]	-0.784762	0.00973126	-1.76412	0.104655	0.99919	-4.53452
ENSG00000135272	MDFIC	MyoD family inhibitor domain containing [Source:HGNC Symbol;Acc:HGNC:28870]	-0.243608	4.10482	-1.764	0.104676	0.99919	-4.38121
ENSG00000179029	TMEM107	transmembrane protein 107 [Source:HGNC Symbol;Acc:HGNC:28128]	-0.274679	5.13781	-1.76364	0.104739	0.99919	-4.35877
ENSG00000156535	CD109	CD109 molecule [Source:HGNC Symbol;Acc:HGNC:21685]	0.405981	7.28348	1.76338	0.104784	0.99919	-4.34894
ENSG00000181523	SGSH	N-sulfoglucosamine sulfohydrolase [Source:HGNC Symbol;Acc:HGNC:10818]	0.224547	5.25307	1.76331	0.104797	0.99919	-4.35537
ENSG00000126464	PRR12	proline rich 12 [Source:HGNC Symbol;Acc:HGNC:29217]	-0.355721	2.80326	-1.76316	0.104824	0.99919	-4.42902
ENSG00000205707	ETFRF1	LYR motif containing 5 [Source:HGNC Symbol;Acc:HGNC:27052]	-0.266232	4.16	-1.76309	0.104836	0.99919	-4.38005
ENSG00000143570	SLC39A1	solute carrier family 39 member 1 [Source:HGNC Symbol;Acc:HGNC:12876]	-0.240644	7.44995	-1.76286	0.104875	0.99919	-4.3492
ENSG00000135842	FAM129A	family with sequence similarity 129 member A [Source:HGNC Symbol;Acc:HGNC:16784]	0.440569	2.02469	1.76279	0.104887	0.99919	-4.4516
ENSG00000181097	NA	NA	-0.271905	6.53271	-1.76235	0.104965	0.99919	-4.34822
ENSG00000201183	RNVU1-3	RNA, variant U1 small nuclear 3 [Source:HGNC Symbol;Acc:HGNC:48311]	-0.525607	0.284264	-1.76235	0.104966	0.99919	-4.52812
ENSG00000198682	PAPSS2	3'-phosphoadenosine 5'-phosphosulfate synthase 2 [Source:HGNC Symbol;Acc:HGNC:8604]	-0.507331	0.249865	-1.76222	0.104987	0.99919	-4.52757
ENSG00000120519	SLC10A7	solute carrier family 10 member 7 [Source:HGNC Symbol;Acc:HGNC:23088]	-0.48645	0.758475	-1.76216	0.104998	0.99919	-4.5132
ENSG00000090447	TFAP4	transcription factor AP-4 [Source:HGNC Symbol;Acc:HGNC:11745]	-0.528359	4.3524	-1.76164	0.105089	0.99919	-4.3781
ENSG00000143321	HDGF	hepatoma-derived growth factor [Source:HGNC Symbol;Acc:HGNC:4856]	-0.282769	8.71242	-1.7613	0.105149	0.99919	-4.35567
ENSG00000106392	C1GALT1	core 1 synthase, glycoprotein-N-acetylgalactosamine 3-beta-galactosyltransferase 1 [Source:HGNC Symbol;Acc:HGNC:24337]	0.254318	4.10758	1.76126	0.105156	0.99919	-4.37839
ENSG00000179918	SEPHS2	selenophosphate synthetase 2 [Source:HGNC Symbol;Acc:HGNC:19686]	-0.214315	5.54473	-1.76079	0.105238	0.99919	-4.35441
ENSG00000264164	NA	NA	0.324648	2.45813	1.76019	0.105344	0.99919	-4.43558
ENSG00000230513	THAP7-AS1	THAP7 antisense RNA 1 [Source:HGNC Symbol;Acc:HGNC:41013]	0.320768	2.86063	1.75966	0.105438	0.99919	-4.41996
ENSG00000168803	ADAL	adenosine deaminase like [Source:HGNC Symbol;Acc:HGNC:31853]	0.259732	4.2988	1.75927	0.105505	0.99919	-4.37428
ENSG00000182272	B4GALNT4	beta-1,4-N-acetyl-galactosaminyltransferase 4 [Source:HGNC Symbol;Acc:HGNC:26315]	-0.298579	3.78951	-1.75878	0.105592	0.99919	-4.39312
ENSG00000110851	PRDM4	PR/SET domain 4 [Source:HGNC Symbol;Acc:HGNC:9348]	-0.288912	4.7773	-1.75877	0.105594	0.99919	-4.36724
ENSG00000125743	SNRPD2	small nuclear ribonucleoprotein D2 polypeptide [Source:HGNC Symbol;Acc:HGNC:11159]	-0.239102	9.11501	-1.75848	0.105646	0.99919	-4.35904
ENSG00000260032	NORAD	non-coding RNA activated by DNA damage [Source:HGNC Symbol;Acc:HGNC:44311]	-0.30528	8.18414	-1.75814	0.105705	0.99919	-4.35411
ENSG00000213448	RPS23P2	ribosomal protein S23 pseudogene 2 [Source:HGNC Symbol;Acc:HGNC:36568]	0.700214	-0.627483	1.75798	0.105733	0.99919	-4.54309
ENSG00000170296	GABARAP	GABA type A receptor-associated protein [Source:HGNC Symbol;Acc:HGNC:4067]	0.642218	0.153304	1.75752	0.105815	0.99919	-4.52282
ENSG00000197771	MCMBP	minichromosome maintenance complex binding protein [Source:HGNC Symbol;Acc:HGNC:25782]	-0.232847	4.86216	-1.75746	0.105825	0.99919	-4.36564
ENSG00000087266	SH3BP2	SH3 domain binding protein 2 [Source:HGNC Symbol;Acc:HGNC:10825]	-0.338517	6.42835	-1.75693	0.105918	0.99919	-4.3507
ENSG00000168936	TMEM129	transmembrane protein 129 [Source:HGNC Symbol;Acc:HGNC:25137]	-0.209136	6.37968	-1.75558	0.106158	0.99919	-4.35119
ENSG00000222009	BTBD19	BTB domain containing 19 [Source:HGNC Symbol;Acc:HGNC:27145]	-0.635026	0.479856	-1.75547	0.106177	0.99919	-4.5234
ENSG00000256338	RPL41P2	ribosomal protein L41 pseudogene 2 [Source:HGNC Symbol;Acc:HGNC:10357]	0.473587	2.13517	1.75541	0.106189	0.99919	-4.44918
ENSG00000279549	NA	NA	-0.991488	-0.277952	-1.75523	0.106219	0.99919	-4.5462
ENSG00000013588	GPRC5A	G protein-coupled receptor class C group 5 member A [Source:HGNC Symbol;Acc:HGNC:9836]	0.306661	6.85538	1.75328	0.106566	0.99919	-4.35189
ENSG00000131373	HACL1	2-hydroxyacyl-CoA lyase 1 [Source:HGNC Symbol;Acc:HGNC:17856]	-0.296038	4.59931	-1.75304	0.106609	0.99919	-4.37312
ENSG00000089775	ZBTB25	zinc finger and BTB domain containing 25 [Source:HGNC Symbol;Acc:HGNC:13112]	0.28438	3.63901	1.75281	0.106649	0.99919	-4.3944
ENSG00000153207	AHCTF1	AT-hook containing transcription factor 1 [Source:HGNC Symbol;Acc:HGNC:24618]	-0.231534	6.42659	-1.75081	0.107005	0.99919	-4.35303
ENSG00000181938	GINS3	GINS complex subunit 3 [Source:HGNC Symbol;Acc:HGNC:25851]	-0.26804	4.38685	-1.75037	0.107084	0.99919	-4.37873
ENSG00000136098	NEK3	NIMA related kinase 3 [Source:HGNC Symbol;Acc:HGNC:7746]	-0.36261	3.08801	-1.74942	0.107253	0.99919	-4.42107
ENSG00000078967	UBE2D4	ubiquitin conjugating enzyme E2 D4 (putative) [Source:HGNC Symbol;Acc:HGNC:21647]	0.286434	3.21816	1.74939	0.107259	0.99919	-4.40958
ENSG00000019485	PRDM11	PR/SET domain 11 [Source:HGNC Symbol;Acc:HGNC:13996]	0.323867	2.98111	1.74928	0.107279	0.99919	-4.41785
ENSG00000236439	NA	NA	0.608056	0.337856	1.74878	0.107369	0.99919	-4.51933
ENSG00000196372	ASB13	ankyrin repeat and SOCS box containing 13 [Source:HGNC Symbol;Acc:HGNC:19765]	0.267467	3.54565	1.74866	0.10739	0.99919	-4.39883
ENSG00000125144	MT1G	metallothionein 1G [Source:HGNC Symbol;Acc:HGNC:7399]	-0.372749	6.05358	-1.74865	0.107391	0.99919	-4.35566
ENSG00000196865	NHLRC2	NHL repeat containing 2 [Source:HGNC Symbol;Acc:HGNC:24731]	-0.296578	5.26073	-1.74852	0.107415	0.99919	-4.36292
ENSG00000223414	LINC00473	long intergenic non-protein coding RNA 473 [Source:HGNC Symbol;Acc:HGNC:21160]	-0.521942	0.413603	-1.74824	0.107464	0.99919	-4.5248
ENSG00000100726	TELO2	telomere maintenance 2 [Source:HGNC Symbol;Acc:HGNC:29099]	-0.679008	3.54269	-1.74806	0.107497	0.99919	-4.4079
ENSG00000188015	S100A3	S100 calcium binding protein A3 [Source:HGNC Symbol;Acc:HGNC:10493]	0.409016	4.39175	1.74672	0.107736	0.99919	-4.37596
ENSG00000196150	ZNF250	zinc finger protein 250 [Source:HGNC Symbol;Acc:HGNC:13044]	0.457521	1.95735	1.74598	0.107871	0.99919	-4.4585
ENSG00000150636	CCDC102B	coiled-coil domain containing 102B [Source:HGNC Symbol;Acc:HGNC:26295]	0.513027	1.23713	1.74595	0.107875	0.99919	-4.48774
ENSG00000070367	EXOC5	exocyst complex component 5 [Source:HGNC Symbol;Acc:HGNC:10696]	0.220884	4.84535	1.74455	0.108127	0.99919	-4.36863
ENSG00000163872	YEATS2	YEATS domain containing 2 [Source:HGNC Symbol;Acc:HGNC:25489]	0.356146	5.73112	1.74447	0.108141	0.99919	-4.35804
ENSG00000039139	DNAH5	dynein axonemal heavy chain 5 [Source:HGNC Symbol;Acc:HGNC:2950]	0.337002	2.8801	1.74406	0.108215	0.99919	-4.42286
ENSG00000244038	DDOST	dolichyl-diphosphooligosaccharide--protein glycosyltransferase non-catalytic subunit [Source:HGNC Symbol;Acc:HGNC:2728]	-0.327407	6.94008	-1.7436	0.108298	0.99919	-4.35578
ENSG00000132589	FLOT2	flotillin 2 [Source:HGNC Symbol;Acc:HGNC:3758]	-0.299212	7.39288	-1.74358	0.108302	0.99919	-4.35677
ENSG00000175931	UBE2O	ubiquitin conjugating enzyme E2 O [Source:HGNC Symbol;Acc:HGNC:29554]	-0.216464	6.01256	-1.74243	0.108509	0.99919	-4.35805
ENSG00000177283	FZD8	frizzled class receptor 8 [Source:HGNC Symbol;Acc:HGNC:4046]	-0.34679	5.61504	-1.74221	0.108548	0.99919	-4.36146
ENSG00000110719	TCIRG1	T-cell immune regulator 1, ATPase H+ transporting V0 subunit a3 [Source:HGNC Symbol;Acc:HGNC:11647]	0.39255	2.1787	1.74192	0.108601	0.99919	-4.45038
ENSG00000269896	NA	NA	-0.471854	1.75571	-1.74187	0.10861	0.99919	-4.47904
ENSG00000103343	ZNF174	zinc finger protein 174 [Source:HGNC Symbol;Acc:HGNC:12963]	0.383507	1.7401	1.74157	0.108666	0.99919	-4.46931
ENSG00000142765	SYTL1	synaptotagmin like 1 [Source:HGNC Symbol;Acc:HGNC:15584]	0.491119	2.95345	1.74073	0.108816	0.99919	-4.4199
ENSG00000118508	RAB32	RAB32, member RAS oncogene family [Source:HGNC Symbol;Acc:HGNC:9772]	0.288445	4.3354	1.74071	0.10882	0.99919	-4.3799
ENSG00000175643	RMI2	RecQ mediated genome instability 2 [Source:HGNC Symbol;Acc:HGNC:28349]	-0.299733	4.68712	-1.74062	0.108836	0.99919	-4.37566
ENSG00000130304	SLC27A1	solute carrier family 27 member 1 [Source:HGNC Symbol;Acc:HGNC:10995]	-0.271535	5.40322	-1.74035	0.108885	0.99919	-4.36421
ENSG00000141522	ARHGDIA	Rho GDP dissociation inhibitor alpha [Source:HGNC Symbol;Acc:HGNC:678]	-0.468104	7.61888	-1.74028	0.108899	0.99919	-4.35875
ENSG00000103187	COTL1	coactosin like F-actin binding protein 1 [Source:HGNC Symbol;Acc:HGNC:18304]	0.219881	7.82005	1.74012	0.108927	0.99919	-4.36016
ENSG00000004779	NDUFAB1	NADH:ubiquinone oxidoreductase subunit AB1 [Source:HGNC Symbol;Acc:HGNC:7694]	-0.232535	7.4437	-1.73978	0.108989	0.99919	-4.35848
ENSG00000164308	ERAP2	endoplasmic reticulum aminopeptidase 2 [Source:HGNC Symbol;Acc:HGNC:29499]	0.340609	3.76083	1.73963	0.109016	0.99919	-4.3949
ENSG00000158941	CCAR2	cell cycle and apoptosis regulator 2 [Source:HGNC Symbol;Acc:HGNC:23360]	-0.433059	3.59932	-1.73951	0.109038	0.99919	-4.40647
ENSG00000171388	APLN	apelin [Source:HGNC Symbol;Acc:HGNC:16665]	0.549684	1.16138	1.73846	0.109228	0.99919	-4.49125
ENSG00000111653	ING4	inhibitor of growth family member 4 [Source:HGNC Symbol;Acc:HGNC:19423]	0.241272	5.44626	1.7382	0.109276	0.99919	-4.36304
ENSG00000099999	RNF215	ring finger protein 215 [Source:HGNC Symbol;Acc:HGNC:33434]	-0.446475	1.90987	-1.73815	0.109285	0.99919	-4.47236
ENSG00000132688	NES	nestin [Source:HGNC Symbol;Acc:HGNC:7756]	-0.482441	2.03828	-1.7381	0.109295	0.99919	-4.46788
ENSG00000167074	TEF	TEF, PAR bZIP transcription factor [Source:HGNC Symbol;Acc:HGNC:11722]	-0.381524	3.57958	-1.73751	0.109401	0.99919	-4.40721
ENSG00000164663	USP49	ubiquitin specific peptidase 49 [Source:HGNC Symbol;Acc:HGNC:20078]	-0.339892	3.52999	-1.73699	0.109496	0.99919	-4.40855
ENSG00000175505	CLCF1	cardiotrophin-like cytokine factor 1 [Source:HGNC Symbol;Acc:HGNC:17412]	-0.321805	2.72379	-1.73696	0.109502	0.99919	-4.43779
ENSG00000187957	DNER	delta/notch like EGF repeat containing [Source:HGNC Symbol;Acc:HGNC:24456]	0.32665	7.19168	1.73673	0.109543	0.99919	-4.35935
ENSG00000142065	ZFP14	ZFP14 zinc finger protein [Source:HGNC Symbol;Acc:HGNC:29312]	0.259033	4.30909	1.73662	0.109563	0.99919	-4.38205
ENSG00000118894	EEF2KMT	eukaryotic elongation factor 2 lysine methyltransferase [Source:HGNC Symbol;Acc:HGNC:32221]	-0.270245	4.63939	-1.73623	0.109634	0.99919	-4.37812
ENSG00000114942	EEF1B2	eukaryotic translation elongation factor 1 beta 2 [Source:HGNC Symbol;Acc:HGNC:3208]	0.241337	8.40577	1.7358	0.109714	0.99919	-4.36471
ENSG00000279799	NA	NA	0.292392	2.586	1.73555	0.109759	0.99919	-4.43671
ENSG00000153944	MSI2	musashi RNA binding protein 2 [Source:HGNC Symbol;Acc:HGNC:18585]	-0.265059	5.15481	-1.73516	0.10983	0.99919	-4.36937
ENSG00000176919	C8G	complement component 8, gamma polypeptide [Source:HGNC Symbol;Acc:HGNC:1354]	0.394205	2.05897	1.73505	0.10985	0.99919	-4.45778
ENSG00000112699	GMDS	GDP-mannose 4,6-dehydratase [Source:HGNC Symbol;Acc:HGNC:4369]	0.23818	5.28648	1.73361	0.110113	0.99919	-4.36654
ENSG00000013561	RNF14	ring finger protein 14 [Source:HGNC Symbol;Acc:HGNC:10058]	-0.235793	7.47796	-1.73326	0.110178	0.99919	-4.36121
ENSG00000009844	VTA1	vesicle trafficking 1 [Source:HGNC Symbol;Acc:HGNC:20954]	-0.236537	6.36889	-1.73312	0.110202	0.99919	-4.36034
ENSG00000085511	MAP3K4	mitogen-activated protein kinase kinase kinase 4 [Source:HGNC Symbol;Acc:HGNC:6856]	-0.236392	5.15307	-1.73279	0.110262	0.99919	-4.3702
ENSG00000156795	WDYHV1	WDYHV motif containing 1 [Source:HGNC Symbol;Acc:HGNC:25490]	-0.305856	2.90051	-1.73267	0.110286	0.99919	-4.4313
ENSG00000156642	NPTN	neuroplastin [Source:HGNC Symbol;Acc:HGNC:17867]	-0.238234	6.6764	-1.73249	0.110318	0.99919	-4.36016
ENSG00000120137	PANK3	pantothenate kinase 3 [Source:HGNC Symbol;Acc:HGNC:19365]	-0.246829	4.69031	-1.73223	0.110365	0.99919	-4.37837
ENSG00000275236	NA	NA	0.371679	2.40237	1.7318	0.110445	0.99919	-4.44452
ENSG00000130770	ATPIF1	ATPase inhibitory factor 1 [Source:HGNC Symbol;Acc:HGNC:871]	0.338348	7.68189	1.73164	0.110474	0.99919	-4.36308
ENSG00000227097	RPS28P7	ribosomal protein S28 pseudogene 7 [Source:HGNC Symbol;Acc:HGNC:35787]	0.567275	1.67572	1.73122	0.110551	0.99919	-4.47252
ENSG00000198876	DCAF12	DDB1 and CUL4 associated factor 12 [Source:HGNC Symbol;Acc:HGNC:19911]	-0.396115	5.16664	-1.73106	0.110579	0.99919	-4.37147
ENSG00000074356	NCBP3	nuclear cap binding subunit 3 [Source:HGNC Symbol;Acc:HGNC:24612]	-0.270804	5.84966	-1.7306	0.110665	0.99919	-4.36394
ENSG00000092439	TRPM7	transient receptor potential cation channel subfamily M member 7 [Source:HGNC Symbol;Acc:HGNC:17994]	-0.338258	6.88398	-1.72985	0.110803	0.99919	-4.3613
ENSG00000119699	TGFB3	transforming growth factor beta 3 [Source:HGNC Symbol;Acc:HGNC:11769]	0.35873	2.05524	1.72974	0.110824	0.99919	-4.45902
ENSG00000263528	IKBKE	inhibitor of kappa light polypeptide gene enhancer in B-cells, kinase epsilon [Source:HGNC Symbol;Acc:HGNC:14552]	0.297884	2.72603	1.72948	0.110871	0.99919	-4.43302
ENSG00000234589	NA	NA	0.952717	-0.23148	1.72937	0.110892	0.99919	-4.53551
ENSG00000082641	NFE2L1	nuclear factor, erythroid 2 like 1 [Source:HGNC Symbol;Acc:HGNC:7781]	0.255388	6.6413	1.72875	0.111005	0.99919	-4.36155
ENSG00000249042	NA	NA	0.354442	1.36058	1.72829	0.111091	0.99919	-4.4874
ENSG00000126522	ASL	argininosuccinate lyase [Source:HGNC Symbol;Acc:HGNC:746]	0.26376	4.25935	1.72813	0.11112	0.99919	-4.38636
ENSG00000198561	CTNND1	catenin delta 1 [Source:HGNC Symbol;Acc:HGNC:2515]	-0.255695	6.81969	-1.7277	0.1112	0.99919	-4.3621
ENSG00000101425	BPI	bactericidal/permeability-increasing protein [Source:HGNC Symbol;Acc:HGNC:1095]	-0.66351	-0.491779	-1.72695	0.111337	0.99919	-4.5501
ENSG00000100612	DHRS7	dehydrogenase/reductase 7 [Source:HGNC Symbol;Acc:HGNC:21524]	0.313487	5.45966	1.72636	0.111446	0.99919	-4.36744
ENSG00000124399	NDUFB4P12	NADH:ubiquinone oxidoreductase subunit B4 pseudogene 12 [Source:HGNC Symbol;Acc:HGNC:45260]	0.633391	0.317812	1.72627	0.111464	0.99919	-4.52175
ENSG00000101109	STK4	serine/threonine kinase 4 [Source:HGNC Symbol;Acc:HGNC:11408]	-0.218405	5.78966	-1.72583	0.111545	0.99919	-4.36613
ENSG00000141429	GALNT1	polypeptide N-acetylgalactosaminyltransferase 1 [Source:HGNC Symbol;Acc:HGNC:4123]	0.223982	5.85435	1.72575	0.11156	0.99919	-4.36494
ENSG00000041802	LSG1	large 60S subunit nuclear export GTPase 1 [Source:HGNC Symbol;Acc:HGNC:25652]	-0.295157	5.75491	-1.72564	0.11158	0.99919	-4.3667
ENSG00000267194	NA	NA	0.468258	0.787035	1.72483	0.111729	0.99919	-4.50783
ENSG00000101311	FERMT1	fermitin family member 1 [Source:HGNC Symbol;Acc:HGNC:15889]	-0.412395	5.48375	-1.72415	0.111856	0.99919	-4.3702
ENSG00000144959	NCEH1	neutral cholesterol ester hydrolase 1 [Source:HGNC Symbol;Acc:HGNC:29260]	0.290695	5.01899	1.72411	0.111863	0.99919	-4.37348
ENSG00000187479	C11orf96	chromosome 11 open reading frame 96 [Source:HGNC Symbol;Acc:HGNC:38675]	0.558204	-0.351512	1.72342	0.111992	0.99919	-4.54094
ENSG00000067177	PHKA1	phosphorylase kinase regulatory subunit alpha 1 [Source:HGNC Symbol;Acc:HGNC:8925]	-0.240072	3.93465	-1.72338	0.111998	0.99919	-4.39957
ENSG00000278948	NA	NA	-0.732021	-0.170834	-1.72317	0.112038	0.99919	-4.54289
ENSG00000170421	KRT8	keratin 8 [Source:HGNC Symbol;Acc:HGNC:6446]	0.416772	8.48746	1.72312	0.112047	0.99919	-4.37031
ENSG00000153029	MR1	major histocompatibility complex, class I-related [Source:HGNC Symbol;Acc:HGNC:4975]	0.315151	4.44265	1.72299	0.112071	0.99919	-4.38379
ENSG00000256340	ABCC6P1	ATP binding cassette subfamily C member 6 pseudogene 1 [Source:HGNC Symbol;Acc:HGNC:33352]	0.576561	0.382861	1.72214	0.112229	0.99919	-4.52107
ENSG00000105640	RPL18A	ribosomal protein L18a [Source:HGNC Symbol;Acc:HGNC:10311]	0.464757	5.50625	1.72212	0.112234	0.99919	-4.36847
ENSG00000150961	SEC24D	SEC24 homolog D, COPII coat complex component [Source:HGNC Symbol;Acc:HGNC:10706]	0.482164	1.59834	1.72104	0.112435	0.99919	-4.47746
ENSG00000100804	PSMB5	proteasome subunit beta 5 [Source:HGNC Symbol;Acc:HGNC:9542]	0.235656	8.49631	1.72102	0.112438	0.99919	-4.37095
ENSG00000198522	GPN1	GPN-loop GTPase 1 [Source:HGNC Symbol;Acc:HGNC:17030]	-0.29809	6.32324	-1.72056	0.112525	0.99919	-4.3656
ENSG00000117360	PRPF3	pre-mRNA processing factor 3 [Source:HGNC Symbol;Acc:HGNC:17348]	-0.279712	4.7991	-1.72011	0.112608	0.99919	-4.38101
ENSG00000121211	MND1	meiotic nuclear divisions 1 [Source:HGNC Symbol;Acc:HGNC:24839]	-0.231852	5.60672	-1.71952	0.112718	0.99919	-4.37014
ENSG00000219928	NA	NA	0.630593	2.34715	1.7193	0.112759	0.99919	-4.44819
ENSG00000102265	TIMP1	TIMP metallopeptidase inhibitor 1 [Source:HGNC Symbol;Acc:HGNC:11820]	0.291194	7.25645	1.71866	0.11288	0.99919	-4.36676
ENSG00000100625	SIX4	SIX homeobox 4 [Source:HGNC Symbol;Acc:HGNC:10890]	-0.245313	5.52153	-1.71846	0.112916	0.99919	-4.37139
ENSG00000178773	CPNE7	copine 7 [Source:HGNC Symbol;Acc:HGNC:2320]	-0.669794	5.14928	-1.71821	0.112963	0.99919	-4.37806
ENSG00000186007	LEMD1	LEM domain containing 1 [Source:HGNC Symbol;Acc:HGNC:18725]	0.76125	0.20807	1.71817	0.112972	0.99919	-4.52464
ENSG00000101096	NFATC2	nuclear factor of activated T-cells 2 [Source:HGNC Symbol;Acc:HGNC:7776]	0.525177	4.08225	1.7177	0.11306	0.99919	-4.39276
ENSG00000213462	ERV3-1	endogenous retrovirus group 3 member 1 [Source:HGNC Symbol;Acc:HGNC:3454]	0.346318	5.15668	1.71736	0.113123	0.99919	-4.37412
ENSG00000100242	SUN2	Sad1 and UNC84 domain containing 2 [Source:HGNC Symbol;Acc:HGNC:14210]	0.41981	6.63039	1.71651	0.113282	0.99919	-4.36657
ENSG00000223575	RBMX2P3	RNA binding motif protein, X-linked 2 pseudogene 3 [Source:HGNC Symbol;Acc:HGNC:39925]	-0.79647	-0.702026	-1.7155	0.113472	0.99919	-4.5552
ENSG00000082014	SMARCD3	SWI/SNF related, matrix associated, actin dependent regulator of chromatin, subfamily d, member 3 [Source:HGNC Symbol;Acc:HGNC:11108]	0.2887	5.41851	1.71491	0.113584	0.99919	-4.37239
ENSG00000153975	ZUFSP	zinc finger with UFM1 specific peptidase domain [Source:HGNC Symbol;Acc:HGNC:21224]	0.299948	2.5119	1.71459	0.113642	0.99919	-4.44497
ENSG00000214050	FBXO16	F-box protein 16 [Source:HGNC Symbol;Acc:HGNC:13618]	-0.396333	1.24752	-1.7141	0.113735	0.99919	-4.50134
ENSG00000143554	SLC27A3	solute carrier family 27 member 3 [Source:HGNC Symbol;Acc:HGNC:10997]	-0.266848	5.88662	-1.71396	0.113762	0.99919	-4.37032
ENSG00000259780	NA	NA	0.621131	-0.682092	1.71327	0.113892	0.99919	-4.54762
ENSG00000081154	PCNP	PEST proteolytic signal containing nuclear protein [Source:HGNC Symbol;Acc:HGNC:30023]	0.269657	6.55055	1.7128	0.113981	0.99919	-4.36801
ENSG00000116205	TCEANC2	transcription elongation factor A N-terminal and central domain containing 2 [Source:HGNC Symbol;Acc:HGNC:26494]	0.267212	3.6886	1.71251	0.114035	0.99919	-4.40637
ENSG00000168994	PXDC1	PX domain containing 1 [Source:HGNC Symbol;Acc:HGNC:21361]	0.543177	4.11486	1.71188	0.114154	0.99919	-4.39398
ENSG00000174943	KCTD13	potassium channel tetramerization domain containing 13 [Source:HGNC Symbol;Acc:HGNC:22234]	-0.408818	2.30864	-1.71127	0.114269	0.99919	-4.46153
ENSG00000261716	NA	NA	0.367764	3.16574	1.71053	0.11441	0.99919	-4.42229
ENSG00000100473	COCH	cochlin [Source:HGNC Symbol;Acc:HGNC:2180]	0.352481	2.97174	1.71017	0.114479	0.99919	-4.42919
ENSG00000076513	ANKRD13A	ankyrin repeat domain 13A [Source:HGNC Symbol;Acc:HGNC:21268]	0.253204	4.67321	1.70876	0.114745	0.99919	-4.38487
ENSG00000119326	CTNNAL1	catenin alpha like 1 [Source:HGNC Symbol;Acc:HGNC:2512]	0.24663	5.61238	1.7076	0.114966	0.99919	-4.3737
ENSG00000145685	LHFPL2	lipoma HMGIC fusion partner-like 2 [Source:HGNC Symbol;Acc:HGNC:6588]	0.282717	3.72657	1.70746	0.114992	0.99919	-4.40664
ENSG00000183520	UTP11	UTP11, small subunit processome component homolog (S. cerevisiae) [Source:HGNC Symbol;Acc:HGNC:24329]	-0.239886	5.34887	-1.70743	0.114999	0.99919	-4.37748
ENSG00000006831	ADIPOR2	adiponectin receptor 2 [Source:HGNC Symbol;Acc:HGNC:24041]	-0.300876	7.71933	-1.70708	0.115064	0.99919	-4.37246
ENSG00000167703	SLC43A2	solute carrier family 43 member 2 [Source:HGNC Symbol;Acc:HGNC:23087]	-0.289637	6.28195	-1.70677	0.115124	0.99919	-4.37125
ENSG00000166046	TCP11L2	t-complex 11 like 2 [Source:HGNC Symbol;Acc:HGNC:28627]	0.597201	0.0695137	1.70623	0.115227	0.99919	-4.53187
ENSG00000197958	RPL12	ribosomal protein L12 [Source:HGNC Symbol;Acc:HGNC:10302]	0.282816	9.46431	1.70555	0.115355	0.99919	-4.38181
ENSG00000269713	NBPF9	neuroblastoma breakpoint family member 9 [Source:HGNC Symbol;Acc:HGNC:31991]	-0.361648	1.86507	-1.70552	0.115363	0.99919	-4.47844
ENSG00000226180	NA	NA	-0.455003	1.48093	-1.70505	0.115451	0.99919	-4.49301
ENSG00000270419	CAHM	colon adenocarcinoma hypermethylated (non-protein coding) [Source:HGNC Symbol;Acc:HGNC:42860]	0.423715	3.42576	1.70495	0.115471	0.99919	-4.41518
ENSG00000146802	TMEM168	transmembrane protein 168 [Source:HGNC Symbol;Acc:HGNC:25826]	-0.28029	3.70386	-1.70485	0.115489	0.99919	-4.41268
ENSG00000198369	SPRED2	sprouty related EVH1 domain containing 2 [Source:HGNC Symbol;Acc:HGNC:17722]	-0.415473	2.68719	-1.70474	0.11551	0.99919	-4.44743
ENSG00000144867	SRPRB	SRP receptor beta subunit [Source:HGNC Symbol;Acc:HGNC:24085]	0.293701	7.90535	1.70423	0.115608	0.99919	-4.37487
ENSG00000080822	CLDND1	claudin domain containing 1 [Source:HGNC Symbol;Acc:HGNC:1322]	0.44363	3.4352	1.70421	0.115612	0.99919	-4.41501
ENSG00000096433	ITPR3	inositol 1,4,5-trisphosphate receptor type 3 [Source:HGNC Symbol;Acc:HGNC:6182]	-0.210069	6.88317	-1.7039	0.115672	0.99919	-4.37173
ENSG00000247572	CKMT2-AS1	CKMT2 antisense RNA 1 [Source:HGNC Symbol;Acc:HGNC:48997]	-0.291541	4.60329	-1.70346	0.115756	0.99919	-4.39098
ENSG00000070087	PFN2	profilin 2 [Source:HGNC Symbol;Acc:HGNC:8882]	0.372619	7.0542	1.70327	0.115792	0.99919	-4.37251
ENSG00000260774	NA	NA	0.595402	0.45527	1.70313	0.115819	0.99919	-4.52095
ENSG00000158528	PPP1R9A	protein phosphatase 1 regulatory subunit 9A [Source:HGNC Symbol;Acc:HGNC:14946]	0.54949	0.520008	1.70311	0.115822	0.99919	-4.51879
ENSG00000276256	NA	uncharacterized protein LOC389831 [Source:RefSeq peptide;Acc:NP_001229409]	0.445144	0.175595	1.70297	0.11585	0.99919	-4.5296
ENSG00000197746	PSAP	prosaposin [Source:HGNC Symbol;Acc:HGNC:9498]	0.342831	10.8532	1.70296	0.115851	0.99919	-4.38965
ENSG00000110660	SLC35F2	solute carrier family 35 member F2 [Source:HGNC Symbol;Acc:HGNC:23615]	0.417372	2.4972	1.70287	0.115868	0.99919	-4.44767
ENSG00000010270	STARD3NL	STARD3 N-terminal like [Source:HGNC Symbol;Acc:HGNC:19169]	0.43369	4.90456	1.70246	0.115946	0.99919	-4.38297
ENSG00000119720	NRDE2	NRDE-2, necessary for RNA interference, domain containing [Source:HGNC Symbol;Acc:HGNC:20186]	0.218256	4.28547	1.70191	0.116053	0.99919	-4.39515
ENSG00000171100	MTM1	myotubularin 1 [Source:HGNC Symbol;Acc:HGNC:7448]	-0.388523	1.16452	-1.7012	0.116189	0.99919	-4.50479
ENSG00000136463	TACO1	translational activator of cytochrome c oxidase I [Source:HGNC Symbol;Acc:HGNC:24316]	-0.216491	5.97056	-1.70063	0.116298	0.99919	-4.37498
ENSG00000164124	TMEM144	transmembrane protein 144 [Source:HGNC Symbol;Acc:HGNC:25633]	0.337061	2.61299	1.70044	0.116334	0.99919	-4.44451
ENSG00000137804	NUSAP1	nucleolar and spindle associated protein 1 [Source:HGNC Symbol;Acc:HGNC:18538]	0.244623	6.89698	1.70044	0.116335	0.99919	-4.37326
ENSG00000279696	NA	NA	0.444492	0.323872	1.69955	0.116505	0.99919	-4.52569
ENSG00000087302	C14orf166	chromosome 14 open reading frame 166 [Source:HGNC Symbol;Acc:HGNC:23169]	-0.270062	7.16945	-1.69853	0.116703	0.99919	-4.37431
ENSG00000263280	NA	NA	0.673317	-0.306216	1.69733	0.116935	0.99919	-4.54048
ENSG00000167779	IGFBP6	insulin like growth factor binding protein 6 [Source:HGNC Symbol;Acc:HGNC:5475]	0.493989	5.19404	1.69729	0.116942	0.99919	-4.3812
ENSG00000152229	PSTPIP2	proline-serine-threonine phosphatase interacting protein 2 [Source:HGNC Symbol;Acc:HGNC:9581]	-0.431377	3.86539	-1.69678	0.117041	0.99919	-4.41182
ENSG00000279457	NA	NA	-0.325162	2.74646	-1.69669	0.117058	0.99919	-4.44719
ENSG00000029993	HMGB3	high mobility group box 3 [Source:HGNC Symbol;Acc:HGNC:5004]	-0.214013	7.43708	-1.69648	0.117097	0.99919	-4.37583
ENSG00000258297	NA	NA	0.29755	2.36579	1.69624	0.117144	0.99919	-4.45546
ENSG00000281103	TRG-AS1	T cell receptor gamma locus antisense RNA 1 [Source:HGNC Symbol;Acc:HGNC:48974]	0.589833	-0.138508	1.69615	0.117162	0.99919	-4.53718
ENSG00000240376	NA	NA	0.78674	2.00503	1.69512	0.117362	0.99919	-4.46589
ENSG00000128923	FAM63B	family with sequence similarity 63 member B [Source:HGNC Symbol;Acc:HGNC:26954]	-0.423644	6.45521	-1.69506	0.117372	0.99919	-4.3757
ENSG00000198618	PPIAP22	peptidylprolyl isomerase A pseudogene 22 [Source:HGNC Symbol;Acc:HGNC:17236]	0.461593	2.70582	1.69467	0.117449	0.99919	-4.44152
ENSG00000086289	EPDR1	ependymin related 1 [Source:HGNC Symbol;Acc:HGNC:17572]	0.519857	3.08306	1.69413	0.117553	0.99919	-4.42857
ENSG00000011009	LYPLA2	lysophospholipase II [Source:HGNC Symbol;Acc:HGNC:6738]	-0.302872	6.22022	-1.69396	0.117586	0.99919	-4.37663
ENSG00000120860	WASHC3	coiled-coil domain containing 53 [Source:HGNC Symbol;Acc:HGNC:24256]	0.300167	3.62245	1.69312	0.11775	0.99919	-4.414
ENSG00000013441	CLK1	CDC like kinase 1 [Source:HGNC Symbol;Acc:HGNC:2068]	-0.306409	4.40556	-1.69243	0.117883	0.99919	-4.39898
ENSG00000198205	ZXDA	zinc finger, X-linked, duplicated A [Source:HGNC Symbol;Acc:HGNC:13198]	0.723214	-0.655491	1.6914	0.118084	0.99919	-4.54805
ENSG00000152795	HNRNPDL	heterogeneous nuclear ribonucleoprotein D like [Source:HGNC Symbol;Acc:HGNC:5037]	-0.253018	8.93132	-1.69112	0.118138	0.99919	-4.38411
ENSG00000204179	PTPN20	protein tyrosine phosphatase, non-receptor type 20 [Source:HGNC Symbol;Acc:HGNC:23423]	-0.501942	2.5695	-1.6909	0.118182	0.99919	-4.45655
ENSG00000148832	PAOX	polyamine oxidase (exo-N4-amino) [Source:HGNC Symbol;Acc:HGNC:20837]	0.247423	3.78431	1.68926	0.118502	0.99919	-4.41139
ENSG00000234753	FOXP4-AS1	FOXP4 antisense RNA 1 [Source:HGNC Symbol;Acc:HGNC:50332]	0.334908	1.44266	1.68832	0.118685	0.99919	-4.49099
ENSG00000221914	PPP2R2A	protein phosphatase 2 regulatory subunit Balpha [Source:HGNC Symbol;Acc:HGNC:9304]	-0.213966	7.76805	-1.68803	0.118742	0.99919	-4.38025
ENSG00000164849	GPR146	G protein-coupled receptor 146 [Source:HGNC Symbol;Acc:HGNC:21718]	0.588487	0.541441	1.68781	0.118785	0.99919	-4.5207
ENSG00000117791	MARC2	mitochondrial amidoxime reducing component 2 [Source:HGNC Symbol;Acc:HGNC:26064]	0.294121	3.37212	1.68749	0.118848	0.99919	-4.42317
ENSG00000231784	DBIL5P	diazepam binding inhibitor-like 5, pseudogene [Source:HGNC Symbol;Acc:HGNC:38519]	0.42329	1.00209	1.68724	0.118898	0.99919	-4.50623
ENSG00000170468	C14orf169	chromosome 14 open reading frame 169 [Source:HGNC Symbol;Acc:HGNC:20968]	-0.326419	6.26423	-1.68722	0.118901	0.99919	-4.37921
ENSG00000138399	FASTKD1	FAST kinase domains 1 [Source:HGNC Symbol;Acc:HGNC:26150]	-0.239621	5.32674	-1.68695	0.118953	0.99919	-4.38564
ENSG00000166579	NDEL1	nudE neurodevelopment protein 1 like 1 [Source:HGNC Symbol;Acc:HGNC:17620]	0.281234	5.01097	1.68677	0.118988	0.99919	-4.38786
ENSG00000202314	SNORD6	small nucleolar RNA, C/D box 6 [Source:HGNC Symbol;Acc:HGNC:32703]	0.732741	-0.648299	1.68675	0.118993	0.99919	-4.54922
ENSG00000226445	NA	NA	-0.396678	4.0994	-1.68651	0.11904	0.99919	-4.40892
ENSG00000272994	NA	NA	-0.340731	2.3972	-1.68632	0.119077	0.99919	-4.46281
ENSG00000172992	DCAKD	dephospho-CoA kinase domain containing [Source:HGNC Symbol;Acc:HGNC:26238]	-0.317469	5.30291	-1.68608	0.119124	0.99919	-4.38655
ENSG00000159714	ZDHHC1	zinc finger DHHC-type containing 1 [Source:HGNC Symbol;Acc:HGNC:17916]	0.530883	2.20912	1.68577	0.119185	0.99919	-4.46223
ENSG00000109381	ELF2	E74 like ETS transcription factor 2 [Source:HGNC Symbol;Acc:HGNC:3317]	-0.323507	3.28299	-1.68441	0.119452	0.99919	-4.43204
ENSG00000037965	HOXC8	homeobox C8 [Source:HGNC Symbol;Acc:HGNC:5129]	-0.35507	2.90257	-1.68424	0.119486	0.99919	-4.44486
ENSG00000235173	HGH1	HGH1 homolog [Source:HGNC Symbol;Acc:HGNC:24161]	0.321932	2.92283	1.68412	0.119509	0.99919	-4.43802
ENSG00000197308	GATA3-AS1	GATA3 antisense RNA 1 [Source:HGNC Symbol;Acc:HGNC:33786]	0.660976	-0.539028	1.684	0.119533	0.99919	-4.54736
ENSG00000131504	DIAPH1	diaphanous related formin 1 [Source:HGNC Symbol;Acc:HGNC:2876]	0.286394	6.77756	1.6839	0.119552	0.99919	-4.37973
ENSG00000141425	RPRD1A	regulation of nuclear pre-mRNA domain containing 1A [Source:HGNC Symbol;Acc:HGNC:25560]	-0.293423	5.18828	-1.68371	0.11959	0.99919	-4.38878
ENSG00000272979	NA	NA	0.618726	-0.0290517	1.68362	0.119609	0.99919	-4.5357
ENSG00000181634	TNFSF15	tumor necrosis factor superfamily member 15 [Source:HGNC Symbol;Acc:HGNC:11931]	0.718711	-0.242497	1.68267	0.119796	0.99919	-4.54108
ENSG00000169957	ZNF768	zinc finger protein 768 [Source:HGNC Symbol;Acc:HGNC:26273]	-0.498239	5.82022	-1.68243	0.119843	0.99919	-4.38386
ENSG00000234093	RPS15AP11	ribosomal protein S15a pseudogene 11 [Source:HGNC Symbol;Acc:HGNC:36707]	0.62256	-0.58757	1.68188	0.119951	0.99919	-4.54839
ENSG00000182247	UBE2E2	ubiquitin conjugating enzyme E2 E2 [Source:HGNC Symbol;Acc:HGNC:12478]	0.462071	0.82709	1.68153	0.120021	0.99919	-4.51294
ENSG00000180172	RPS12P23	ribosomal protein S12 pseudogene 23 [Source:HGNC Symbol;Acc:HGNC:35573]	0.729195	-0.506586	1.68134	0.120057	0.99919	-4.54695
ENSG00000137502	RAB30	RAB30, member RAS oncogene family [Source:HGNC Symbol;Acc:HGNC:9770]	0.28914	2.39146	1.68124	0.120078	0.99919	-4.45774
ENSG00000196943	NOP9	NOP9 nucleolar protein [Source:HGNC Symbol;Acc:HGNC:19826]	-0.265835	4.75756	-1.68122	0.120083	0.99919	-4.39591
ENSG00000159692	CTBP1	C-terminal binding protein 1 [Source:HGNC Symbol;Acc:HGNC:2494]	-0.257026	6.84873	-1.67987	0.120348	0.99919	-4.38137
ENSG00000215193	PEX26	peroxisomal biogenesis factor 26 [Source:HGNC Symbol;Acc:HGNC:22965]	-0.218797	6.73523	-1.679	0.120521	0.99919	-4.38166
ENSG00000128335	APOL2	apolipoprotein L2 [Source:HGNC Symbol;Acc:HGNC:619]	0.252757	4.21827	1.67891	0.120539	0.99919	-4.40445
ENSG00000006282	SPATA20	spermatogenesis associated 20 [Source:HGNC Symbol;Acc:HGNC:26125]	0.225995	4.78602	1.6788	0.120562	0.99919	-4.39423
ENSG00000165494	PCF11	PCF11 cleavage and polyadenylation factor subunit [Source:HGNC Symbol;Acc:HGNC:30097]	-0.235839	6.02637	-1.67811	0.120699	0.99919	-4.38368
ENSG00000146909	NOM1	nucleolar protein with MIF4G domain 1 [Source:HGNC Symbol;Acc:HGNC:13244]	-0.318105	5.2683	-1.67804	0.120712	0.99919	-4.39003
ENSG00000177125	ZBTB34	zinc finger and BTB domain containing 34 [Source:HGNC Symbol;Acc:HGNC:31446]	-0.376859	2.99674	-1.67759	0.120801	0.99919	-4.44465
ENSG00000166260	COX11	COX11, cytochrome c oxidase copper chaperone [Source:HGNC Symbol;Acc:HGNC:2261]	-0.34558	6.27832	-1.67712	0.120895	0.99919	-4.38322
ENSG00000279114	NA	NA	0.521206	0.0482079	1.67682	0.120955	0.99919	-4.53542
ENSG00000265254	NA	NA	0.696526	-0.73054	1.67649	0.12102	0.99919	-4.551
ENSG00000178950	GAK	cyclin G associated kinase [Source:HGNC Symbol;Acc:HGNC:4113]	-0.256728	6.2678	-1.67555	0.121208	0.99919	-4.38374
ENSG00000230844	ZNF674-AS1	ZNF674 antisense RNA 1 (head to head) [Source:HGNC Symbol;Acc:HGNC:44266]	-0.293207	3.56974	-1.67491	0.121335	0.99919	-4.42554
ENSG00000047315	POLR2B	RNA polymerase II subunit B [Source:HGNC Symbol;Acc:HGNC:9188]	-0.374475	7.22178	-1.67424	0.12147	0.99919	-4.38411
ENSG00000156510	HKDC1	hexokinase domain containing 1 [Source:HGNC Symbol;Acc:HGNC:23302]	-0.443614	2.34786	-1.67367	0.121582	0.99919	-4.46741
ENSG00000091536	MYO15A	myosin XVA [Source:HGNC Symbol;Acc:HGNC:7594]	0.603863	-0.240177	1.67208	0.121901	0.99919	-4.54158
ENSG00000142102	PGGHG	protein-glucosylgalactosylhydroxylysine glucosidase [Source:HGNC Symbol;Acc:HGNC:26210]	0.241869	4.50597	1.67189	0.121939	0.99919	-4.40136
ENSG00000151014	NOCT	nocturnin [Source:HGNC Symbol;Acc:HGNC:14254]	-0.733582	-0.254628	-1.67138	0.122042	0.99919	-4.55025
ENSG00000197226	TBC1D9B	TBC1 domain family member 9B [Source:HGNC Symbol;Acc:HGNC:29097]	0.289266	5.50694	1.67045	0.122229	0.99919	-4.38903
ENSG00000068097	HEATR6	HEAT repeat containing 6 [Source:HGNC Symbol;Acc:HGNC:24076]	-0.270029	4.54624	-1.67028	0.122262	0.99919	-4.40386
ENSG00000137478	FCHSD2	FCH and double SH3 domains 2 [Source:HGNC Symbol;Acc:HGNC:29114]	-0.378183	3.46816	-1.67019	0.12228	0.99919	-4.43128
ENSG00000090432	MUL1	mitochondrial E3 ubiquitin protein ligase 1 [Source:HGNC Symbol;Acc:HGNC:25762]	0.271765	4.95317	1.67016	0.122286	0.99919	-4.39496
ENSG00000022567	SLC45A4	solute carrier family 45 member 4 [Source:HGNC Symbol;Acc:HGNC:29196]	-0.228647	3.78191	-1.67007	0.122305	0.99919	-4.42091
ENSG00000172922	RNASEH2C	ribonuclease H2 subunit C [Source:HGNC Symbol;Acc:HGNC:24116]	0.370267	5.6457	1.67003	0.122314	0.99919	-4.38812
ENSG00000102595	UGGT2	UDP-glucose glycoprotein glucosyltransferase 2 [Source:HGNC Symbol;Acc:HGNC:15664]	0.222491	4.29058	1.66997	0.122325	0.99919	-4.40633
ENSG00000232119	MCTS1	MCTS1, re-initiation and release factor [Source:HGNC Symbol;Acc:HGNC:23357]	-0.357662	7.81114	-1.66907	0.122507	0.99919	-4.38781
ENSG00000271851	NA	NA	-0.462393	0.884148	-1.66851	0.122619	0.99919	-4.51947
ENSG00000142252	GEMIN7	gem nuclear organelle associated protein 7 [Source:HGNC Symbol;Acc:HGNC:20045]	-0.495166	2.72949	-1.66844	0.122633	0.99919	-4.45593
ENSG00000134987	WDR36	WD repeat domain 36 [Source:HGNC Symbol;Acc:HGNC:30696]	-0.261649	4.73325	-1.66777	0.122768	0.99919	-4.4013
ENSG00000277610	RNVU1-4	RNA, variant U1 small nuclear 4 [Source:HGNC Symbol;Acc:HGNC:48312]	-0.361875	2.78133	-1.66698	0.122927	0.99919	-4.45443
ENSG00000123505	AMD1	adenosylmethionine decarboxylase 1 [Source:HGNC Symbol;Acc:HGNC:457]	-0.189264	6.47555	-1.66691	0.122941	0.99919	-4.38667
ENSG00000163975	MELTF	melanotransferrin [Source:HGNC Symbol;Acc:HGNC:7037]	0.292422	8.12664	1.66682	0.122959	0.99919	-4.39049
ENSG00000204576	PRR3	proline rich 3 [Source:HGNC Symbol;Acc:HGNC:21149]	-0.331643	3.59873	-1.66676	0.122972	0.99919	-4.42818
ENSG00000105732	ZNF574	zinc finger protein 574 [Source:HGNC Symbol;Acc:HGNC:26166]	0.343154	2.65257	1.66626	0.123073	0.99919	-4.45175
ENSG00000099977	DDT	D-dopachrome tautomerase [Source:HGNC Symbol;Acc:HGNC:2732]	0.406497	8.22457	1.66601	0.123124	0.99919	-4.39134
ENSG00000224126	UBE2SP2	ubiquitin conjugating enzyme E2 S pseudogene 2 [Source:HGNC Symbol;Acc:HGNC:32196]	-0.578265	0.154168	-1.66591	0.123142	0.99919	-4.53956
ENSG00000246777	NA	NA	0.590111	-0.241056	1.66586	0.123154	0.99919	-4.54244
ENSG00000007255	TRAPPC6A	trafficking protein particle complex 6A [Source:HGNC Symbol;Acc:HGNC:23069]	-0.303635	6.66457	-1.66584	0.123158	0.99919	-4.387
ENSG00000147894	C9orf72	chromosome 9 open reading frame 72 [Source:HGNC Symbol;Acc:HGNC:28337]	-0.546198	-0.0847024	-1.66578	0.12317	0.99919	-4.54556
ENSG00000182858	ALG12	ALG12, alpha-1,6-mannosyltransferase [Source:HGNC Symbol;Acc:HGNC:19358]	-0.27128	2.79874	-1.66507	0.123313	0.99919	-4.45233
ENSG00000108312	UBTF	upstream binding transcription factor, RNA polymerase I [Source:HGNC Symbol;Acc:HGNC:12511]	-0.430666	7.74563	-1.6647	0.123388	0.99919	-4.38928
ENSG00000165714	BORCS5	BLOC-1 related complex subunit 5 [Source:HGNC Symbol;Acc:HGNC:17950]	-0.318263	2.97917	-1.66385	0.12356	0.99919	-4.44735
ENSG00000158321	AUTS2	autism susceptibility candidate 2 [Source:HGNC Symbol;Acc:HGNC:14262]	-0.378414	2.17808	-1.66332	0.123667	0.99919	-4.47581
ENSG00000127507	ADGRE2	adhesion G protein-coupled receptor E2 [Source:HGNC Symbol;Acc:HGNC:3337]	-0.480313	0.304801	-1.66305	0.123722	0.99919	-4.5368
ENSG00000214184	GCC2-AS1	GCC2 antisense RNA 1 [Source:HGNC Symbol;Acc:HGNC:28126]	0.55236	-0.486348	1.66223	0.123889	0.99919	-4.5479
ENSG00000203485	INF2	inverted formin, FH2 and WH2 domain containing [Source:HGNC Symbol;Acc:HGNC:23791]	0.325031	5.62657	1.66178	0.123981	0.99919	-4.39152
ENSG00000181392	SYNE4	spectrin repeat containing nuclear envelope family member 4 [Source:HGNC Symbol;Acc:HGNC:26703]	0.609301	-0.32987	1.66157	0.124023	0.99919	-4.54484
ENSG00000170638	TRABD	TraB domain containing [Source:HGNC Symbol;Acc:HGNC:28805]	-0.227698	6.61524	-1.66138	0.124062	0.99919	-4.38875
ENSG00000182749	PAQR7	progestin and adipoQ receptor family member 7 [Source:HGNC Symbol;Acc:HGNC:23146]	-0.495988	4.72319	-1.66057	0.124228	0.99919	-4.40508
ENSG00000084652	TXLNA	taxilin alpha [Source:HGNC Symbol;Acc:HGNC:30685]	-0.204402	6.22364	-1.6605	0.12424	0.99919	-4.38981
ENSG00000101882	NKAP	NFKB activating protein [Source:HGNC Symbol;Acc:HGNC:29873]	0.252776	5.73825	1.66047	0.124247	0.99919	-4.39147
ENSG00000237945	LINC00649	long intergenic non-protein coding RNA 649 [Source:HGNC Symbol;Acc:HGNC:44305]	0.218406	4.45687	1.66007	0.124329	0.99919	-4.40667
ENSG00000177854	TMEM187	transmembrane protein 187 [Source:HGNC Symbol;Acc:HGNC:13705]	0.243022	5.13354	1.65995	0.124354	0.99919	-4.39667
ENSG00000117475	BLZF1	basic leucine zipper nuclear factor 1 [Source:HGNC Symbol;Acc:HGNC:1065]	-0.258059	3.15938	-1.65988	0.124368	0.99919	-4.44238
ENSG00000099308	MAST3	microtubule associated serine/threonine kinase 3 [Source:HGNC Symbol;Acc:HGNC:19036]	-0.278085	3.16339	-1.65953	0.12444	0.99919	-4.4425
ENSG00000177303	CASKIN2	CASK interacting protein 2 [Source:HGNC Symbol;Acc:HGNC:18200]	0.369547	2.18168	1.65889	0.124569	0.99919	-4.47012
ENSG00000168591	TMUB2	transmembrane and ubiquitin like domain containing 2 [Source:HGNC Symbol;Acc:HGNC:28459]	0.261323	5.87751	1.65834	0.124683	0.99919	-4.39158
ENSG00000011454	RABGAP1	RAB GTPase activating protein 1 [Source:HGNC Symbol;Acc:HGNC:17155]	-0.217884	6.42547	-1.65822	0.124707	0.99919	-4.39023
ENSG00000154122	ANKH	ANKH inorganic pyrophosphate transport regulator [Source:HGNC Symbol;Acc:HGNC:15492]	0.704788	-0.455652	1.65813	0.124726	0.99919	-4.54757
ENSG00000115042	FAHD2A	fumarylacetoacetate hydrolase domain containing 2A [Source:HGNC Symbol;Acc:HGNC:24252]	0.450301	1.9953	1.65766	0.124821	0.99919	-4.47565
ENSG00000170522	ELOVL6	ELOVL fatty acid elongase 6 [Source:HGNC Symbol;Acc:HGNC:15829]	-0.352231	2.62025	-1.65758	0.124838	0.99919	-4.46132
ENSG00000105135	ILVBL	ilvB acetolactate synthase like [Source:HGNC Symbol;Acc:HGNC:6041]	0.263371	4.39332	1.65698	0.12496	0.99919	-4.40869
ENSG00000154380	ENAH	enabled homolog (Drosophila) [Source:HGNC Symbol;Acc:HGNC:18271]	-0.235844	8.24866	-1.65688	0.124982	0.99919	-4.39434
ENSG00000186792	HYAL3	hyaluronoglucosaminidase 3 [Source:HGNC Symbol;Acc:HGNC:5322]	0.410073	1.35789	1.65671	0.125016	0.99919	-4.49831
ENSG00000278451	NA	NA	0.709977	-0.590183	1.65595	0.125172	0.99919	-4.55002
ENSG00000198440	ZNF583	zinc finger protein 583 [Source:HGNC Symbol;Acc:HGNC:26427]	0.401103	1.19352	1.65594	0.125173	0.99919	-4.50511
ENSG00000230797	YY2	YY2 transcription factor [Source:HGNC Symbol;Acc:HGNC:31684]	0.386468	2.25792	1.65494	0.125379	0.99919	-4.46742
ENSG00000232453	NA	NA	0.463249	1.27471	1.65432	0.125507	0.99919	-4.50199
ENSG00000171246	NPTX1	neuronal pentraxin 1 [Source:HGNC Symbol;Acc:HGNC:7952]	0.46435	-0.141623	1.65402	0.125569	0.99919	-4.54226
ENSG00000153814	JAZF1	JAZF zinc finger 1 [Source:HGNC Symbol;Acc:HGNC:28917]	0.449856	2.59022	1.65375	0.125623	0.99919	-4.4564
ENSG00000164040	PGRMC2	progesterone receptor membrane component 2 [Source:HGNC Symbol;Acc:HGNC:16089]	-0.216277	7.68975	-1.65373	0.125628	0.99919	-4.39355
ENSG00000272024	NA	NA	0.481632	0.0660407	1.65364	0.125647	0.99919	-4.53762
ENSG00000108474	PIGL	phosphatidylinositol glycan anchor biosynthesis class L [Source:HGNC Symbol;Acc:HGNC:8966]	0.277542	3.01957	1.65249	0.125882	0.99919	-4.44428
ENSG00000166455	C16orf46	chromosome 16 open reading frame 46 [Source:HGNC Symbol;Acc:HGNC:26525]	-0.318474	3.30992	-1.65194	0.125997	0.99919	-4.44091
ENSG00000148057	IDNK	IDNK, gluconokinase [Source:HGNC Symbol;Acc:HGNC:31367]	0.290267	3.67543	1.65184	0.126017	0.99919	-4.42593
ENSG00000131061	ZNF341	zinc finger protein 341 [Source:HGNC Symbol;Acc:HGNC:15992]	-0.301912	2.58961	-1.65137	0.126115	0.99919	-4.46306
ENSG00000249992	TMEM158	transmembrane protein 158 (gene/pseudogene) [Source:HGNC Symbol;Acc:HGNC:30293]	0.355009	7.19923	1.65038	0.126319	0.99919	-4.39391
ENSG00000236762	RPL19P16	NA	0.928046	-0.15085	1.64915	0.126574	0.99919	-4.54025
ENSG00000155324	GRAMD3	GRAM domain containing 3 [Source:HGNC Symbol;Acc:HGNC:24911]	-0.226277	5.17032	-1.64907	0.12659	0.99919	-4.40179
ENSG00000197619	ZNF615	zinc finger protein 615 [Source:HGNC Symbol;Acc:HGNC:24740]	0.29377	1.95909	1.64838	0.126734	0.99919	-4.48032
ENSG00000188938	FAM120AOS	family with sequence similarity 120A opposite strand [Source:HGNC Symbol;Acc:HGNC:23389]	0.363672	5.41426	1.6481	0.12679	0.99919	-4.39834
ENSG00000230615	NA	NA	0.530774	0.22507	1.64802	0.126807	0.99919	-4.53316
ENSG00000240342	RPS2P5	ribosomal protein S2 pseudogene 5 [Source:HGNC Symbol;Acc:HGNC:31386]	0.398982	1.40287	1.64793	0.126827	0.99919	-4.49924
ENSG00000173599	PC	pyruvate carboxylase [Source:HGNC Symbol;Acc:HGNC:8636]	-0.659025	2.08529	-1.6477	0.126874	0.99919	-4.48625
ENSG00000176444	CLK2	CDC like kinase 2 [Source:HGNC Symbol;Acc:HGNC:2069]	-0.248989	4.31753	-1.64702	0.127016	0.99919	-4.41634
ENSG00000120942	UBIAD1	UbiA prenyltransferase domain containing 1 [Source:HGNC Symbol;Acc:HGNC:30791]	-0.363136	6.20749	-1.647	0.12702	0.99919	-4.39545
ENSG00000113231	PDE8B	phosphodiesterase 8B [Source:HGNC Symbol;Acc:HGNC:8794]	-0.392226	3.04416	-1.64682	0.127058	0.99919	-4.45134
ENSG00000269246	NA	NA	0.234822	4.6333	1.64678	0.127066	0.99919	-4.40836
ENSG00000261777	NA	NA	0.490104	-0.0769716	1.64659	0.127105	0.99919	-4.54133
ENSG00000273980	NA	NA	-0.332431	1.60941	-1.64631	0.127164	0.99919	-4.49824
ENSG00000111371	SLC38A1	solute carrier family 38 member 1 [Source:HGNC Symbol;Acc:HGNC:13447]	-0.269902	6.03726	-1.64579	0.127271	0.99919	-4.39648
ENSG00000091622	PITPNM3	PITPNM family member 3 [Source:HGNC Symbol;Acc:HGNC:21043]	-0.619305	0.0541169	-1.64444	0.127553	0.99919	-4.54571
ENSG00000189195	BTBD8	BTB domain containing 8 [Source:HGNC Symbol;Acc:HGNC:21019]	0.499587	1.2661	1.64423	0.127596	0.99919	-4.50355
ENSG00000165898	ISCA2	iron-sulfur cluster assembly 2 [Source:HGNC Symbol;Acc:HGNC:19857]	0.267872	4.18079	1.64262	0.127934	0.99919	-4.41776
ENSG00000196182	STK40	serine/threonine kinase 40 [Source:HGNC Symbol;Acc:HGNC:21373]	0.24779	5.74719	1.64256	0.127946	0.99919	-4.39845
ENSG00000131323	TRAF3	TNF receptor associated factor 3 [Source:HGNC Symbol;Acc:HGNC:12033]	-0.295855	5.11582	-1.6425	0.127958	0.99919	-4.40513
ENSG00000234851	RPL23AP42	ribosomal protein L23a pseudogene 42 [Source:HGNC Symbol;Acc:HGNC:35942]	0.292057	4.59477	1.6413	0.12821	0.99919	-4.41085
ENSG00000130830	MPP1	membrane palmitoylated protein 1 [Source:HGNC Symbol;Acc:HGNC:7219]	0.242944	3.51286	1.64052	0.128372	0.99919	-4.43422
ENSG00000157741	UBN2	ubinuclein 2 [Source:HGNC Symbol;Acc:HGNC:21931]	-0.36959	5.09759	-1.64021	0.128439	0.99919	-4.40666
ENSG00000119630	PGF	placental growth factor [Source:HGNC Symbol;Acc:HGNC:8893]	0.627977	-0.0914144	1.63962	0.128561	0.99919	-4.54204
ENSG00000140403	DNAJA4	DnaJ heat shock protein family (Hsp40) member A4 [Source:HGNC Symbol;Acc:HGNC:14885]	0.245523	4.41213	1.63927	0.128636	0.99919	-4.41478
ENSG00000178209	PLEC	plectin [Source:HGNC Symbol;Acc:HGNC:9069]	0.268526	6.79705	1.63914	0.128662	0.99919	-4.39762
ENSG00000272808	NA	NA	-0.653246	0.442663	-1.63906	0.128679	0.99919	-4.53825
ENSG00000139211	AMIGO2	adhesion molecule with Ig like domain 2 [Source:HGNC Symbol;Acc:HGNC:24073]	-0.667229	0.313888	-1.63896	0.128701	0.99919	-4.54167
ENSG00000178935	ZNF552	zinc finger protein 552 [Source:HGNC Symbol;Acc:HGNC:26135]	0.26927	2.83938	1.63823	0.128854	0.99919	-4.45404
ENSG00000162174	ASRGL1	asparaginase like 1 [Source:HGNC Symbol;Acc:HGNC:16448]	-0.207977	4.98014	-1.63813	0.128874	0.99919	-4.40823
ENSG00000078304	PPP2R5C	protein phosphatase 2 regulatory subunit B'gamma [Source:HGNC Symbol;Acc:HGNC:9311]	0.226768	8.02297	1.63807	0.128888	0.99919	-4.40123
ENSG00000162437	RAVER2	ribonucleoprotein, PTB binding 2 [Source:HGNC Symbol;Acc:HGNC:25577]	-0.287097	4.4649	-1.63776	0.128953	0.99919	-4.41712
ENSG00000185567	AHNAK2	AHNAK nucleoprotein 2 [Source:HGNC Symbol;Acc:HGNC:20125]	0.371995	6.26924	1.63748	0.129012	0.99919	-4.39852
ENSG00000079616	KIF22	kinesin family member 22 [Source:HGNC Symbol;Acc:HGNC:6391]	0.309706	6.3318	1.6373	0.12905	0.99919	-4.39847
ENSG00000164535	DAGLB	diacylglycerol lipase beta [Source:HGNC Symbol;Acc:HGNC:28923]	0.236692	4.39863	1.63699	0.129115	0.99919	-4.41585
ENSG00000264364	DYNLL2	dynein light chain LC8-type 2 [Source:HGNC Symbol;Acc:HGNC:24596]	0.23695	7.74429	1.6368	0.129156	0.99919	-4.40073
ENSG00000257727	CNPY2	canopy FGF signaling regulator 2 [Source:HGNC Symbol;Acc:HGNC:13529]	-0.352618	5.93387	-1.63629	0.129262	0.99919	-4.40089
ENSG00000200170	NA	Y RNA [Source:RFAM;Acc:RF00019]	0.853506	0.670507	1.6346	0.12962	0.99919	-4.52196
ENSG00000172071	EIF2AK3	eukaryotic translation initiation factor 2 alpha kinase 3 [Source:HGNC Symbol;Acc:HGNC:3255]	-0.328044	3.97243	-1.63442	0.129657	0.99919	-4.42864
ENSG00000198919	DZIP3	DAZ interacting zinc finger protein 3 [Source:HGNC Symbol;Acc:HGNC:30938]	0.261551	4.57115	1.63439	0.129664	0.99919	-4.41376
ENSG00000122971	ACADS	acyl-CoA dehydrogenase, C-2 to C-3 short chain [Source:HGNC Symbol;Acc:HGNC:90]	0.261205	5.90418	1.63385	0.129779	0.99919	-4.40112
ENSG00000139624	CERS5	ceramide synthase 5 [Source:HGNC Symbol;Acc:HGNC:23749]	-0.432378	6.06064	-1.63336	0.129883	0.99919	-4.40155
ENSG00000189091	SF3B3	splicing factor 3b subunit 3 [Source:HGNC Symbol;Acc:HGNC:10770]	-0.319779	8.21319	-1.63314	0.129928	0.99919	-4.40337
ENSG00000177542	SLC25A22	solute carrier family 25 member 22 [Source:HGNC Symbol;Acc:HGNC:19954]	-0.341462	2.8896	-1.63243	0.13008	0.99919	-4.45891
ENSG00000233452	STXBP5-AS1	STXBP5 antisense RNA 1 [Source:HGNC Symbol;Acc:HGNC:44183]	0.540432	1.31842	1.63196	0.130179	0.99919	-4.50328
ENSG00000177410	ZFAS1	ZNFX1 antisense RNA 1 [Source:HGNC Symbol;Acc:HGNC:33101]	0.324541	7.99864	1.63172	0.130231	0.99919	-4.40371
ENSG00000188428	BLOC1S5	biogenesis of lysosomal organelles complex 1 subunit 5 [Source:HGNC Symbol;Acc:HGNC:18561]	-0.225049	3.73855	-1.63145	0.130287	0.99919	-4.43427
ENSG00000181061	HIGD1A	HIG1 hypoxia inducible domain family member 1A [Source:HGNC Symbol;Acc:HGNC:29527]	0.275045	5.53297	1.63081	0.130423	0.99919	-4.40431
ENSG00000176720	BOK	BOK, BCL2 family apoptosis regulator [Source:HGNC Symbol;Acc:HGNC:1087]	-0.318898	4.41709	-1.63042	0.130507	0.99919	-4.42057
ENSG00000226781	TBCAP1	tubulin folding cofactor A pseudogene 1 [Source:HGNC Symbol;Acc:HGNC:42630]	0.858136	-0.0514606	1.63041	0.13051	0.99919	-4.54072
ENSG00000107485	GATA3	GATA binding protein 3 [Source:HGNC Symbol;Acc:HGNC:4172]	0.322492	2.82255	1.63034	0.130524	0.99919	-4.45576
ENSG00000063660	GPC1	glypican 1 [Source:HGNC Symbol;Acc:HGNC:4449]	0.24976	5.7784	1.62986	0.130626	0.99919	-4.40327
ENSG00000143322	ABL2	ABL proto-oncogene 2, non-receptor tyrosine kinase [Source:HGNC Symbol;Acc:HGNC:77]	-0.219649	5.07804	-1.62962	0.130677	0.99919	-4.41019
ENSG00000113161	HMGCR	3-hydroxy-3-methylglutaryl-CoA reductase [Source:HGNC Symbol;Acc:HGNC:5006]	0.27184	7.65249	1.62939	0.130727	0.99919	-4.40335
ENSG00000169727	GPS1	G protein pathway suppressor 1 [Source:HGNC Symbol;Acc:HGNC:4549]	0.308755	5.8116	1.62892	0.130827	0.99919	-4.40342
ENSG00000272221	NA	NA	-0.601186	-0.731432	-1.62752	0.131125	0.99919	-4.55928
ENSG00000047188	YTHDC2	YTH domain containing 2 [Source:HGNC Symbol;Acc:HGNC:24721]	-0.293933	5.46559	-1.6273	0.131172	0.99919	-4.40741
ENSG00000156482	RPL30	ribosomal protein L30 [Source:HGNC Symbol;Acc:HGNC:10333]	0.212397	9.29339	1.62693	0.131252	0.99919	-4.41065
ENSG00000141338	ABCA8	ATP binding cassette subfamily A member 8 [Source:HGNC Symbol;Acc:HGNC:38]	0.362953	3.61775	1.62654	0.131335	0.99919	-4.43498
ENSG00000187535	IFT140	intraflagellar transport 140 [Source:HGNC Symbol;Acc:HGNC:29077]	-0.394457	1.05047	-1.6265	0.131342	0.99919	-4.52
ENSG00000174206	C12orf66	chromosome 12 open reading frame 66 [Source:HGNC Symbol;Acc:HGNC:26517]	-0.344236	2.84392	-1.6264	0.131365	0.99919	-4.46205
ENSG00000248909	HMGB1P21	high mobility group box 1 pseudogene 21 [Source:HGNC Symbol;Acc:HGNC:39106]	-0.677139	0.0520409	-1.62618	0.131411	0.99919	-4.54664
ENSG00000015285	WAS	Wiskott-Aldrich syndrome [Source:HGNC Symbol;Acc:HGNC:12731]	-0.617232	-0.155998	-1.62612	0.131425	0.99919	-4.5508
ENSG00000132005	RFX1	regulatory factor X1 [Source:HGNC Symbol;Acc:HGNC:9982]	-0.241363	5.78595	-1.62559	0.131538	0.99919	-4.40565
ENSG00000088992	TESC	tescalcin [Source:HGNC Symbol;Acc:HGNC:26065]	-0.372795	2.0672	-1.62559	0.131539	0.99919	-4.48762
ENSG00000185267	CDNF	cerebral dopamine neurotrophic factor [Source:HGNC Symbol;Acc:HGNC:24913]	0.617953	0.0717213	1.62558	0.13154	0.99919	-4.53893
ENSG00000136810	TXN	thioredoxin [Source:HGNC Symbol;Acc:HGNC:12435]	0.370349	8.09772	1.62555	0.131547	0.99919	-4.40651
ENSG00000166710	B2M	beta-2-microglobulin [Source:HGNC Symbol;Acc:HGNC:914]	0.31931	9.65783	1.62524	0.131614	0.99919	-4.41288
ENSG00000159111	MRPL10	mitochondrial ribosomal protein L10 [Source:HGNC Symbol;Acc:HGNC:14055]	-0.217409	5.05424	-1.62502	0.131661	0.99919	-4.41217
ENSG00000186197	EDARADD	EDAR associated death domain [Source:HGNC Symbol;Acc:HGNC:14341]	-0.427087	1.26894	-1.62405	0.131868	0.99919	-4.51453
ENSG00000126561	STAT5A	signal transducer and activator of transcription 5A [Source:HGNC Symbol;Acc:HGNC:11366]	0.34878	3.58405	1.62404	0.13187	0.99919	-4.43669
ENSG00000177697	CD151	CD151 molecule (Raph blood group) [Source:HGNC Symbol;Acc:HGNC:1630]	0.437134	5.56213	1.62371	0.131943	0.99919	-4.40668
ENSG00000205710	C17orf107	chromosome 17 open reading frame 107 [Source:HGNC Symbol;Acc:HGNC:37238]	0.703555	-0.71149	1.62348	0.131992	0.99919	-4.55458
ENSG00000147119	CHST7	carbohydrate sulfotransferase 7 [Source:HGNC Symbol;Acc:HGNC:13817]	0.423352	2.68423	1.62331	0.132027	0.99919	-4.46127
ENSG00000276136	NA	NA	0.51486	-0.552924	1.62296	0.132103	0.99919	-4.55268
ENSG00000213269	NA	NA	0.537438	-0.445237	1.62281	0.132136	0.99919	-4.5505
ENSG00000100243	CYB5R3	cytochrome b5 reductase 3 [Source:HGNC Symbol;Acc:HGNC:2873]	-0.229115	7.00137	-1.62256	0.13219	0.99919	-4.40433
ENSG00000102893	PHKB	phosphorylase kinase regulatory subunit beta [Source:HGNC Symbol;Acc:HGNC:8927]	0.198925	5.42784	1.62214	0.132281	0.99919	-4.40855
ENSG00000270277	NA	NA	-1.12336	-1.06264	-1.62211	0.132286	0.99919	-4.56696
ENSG00000184260	HIST2H2AC	histone cluster 2, H2ac [Source:HGNC Symbol;Acc:HGNC:4738]	0.344892	2.82712	1.62182	0.132349	0.99919	-4.45796
ENSG00000087088	BAX	BCL2 associated X, apoptosis regulator [Source:HGNC Symbol;Acc:HGNC:959]	-0.893477	5.20519	-1.62098	0.13253	0.99919	-4.41488
ENSG00000231770	TMEM44-AS1	TMEM44 antisense RNA 1 [Source:HGNC Symbol;Acc:HGNC:44272]	0.404778	1.74336	1.61887	0.132985	0.99919	-4.49302
ENSG00000165449	SLC16A9	solute carrier family 16 member 9 [Source:HGNC Symbol;Acc:HGNC:23520]	0.4697	0.833803	1.6188	0.133	0.99919	-4.52091
ENSG00000226928	RPS14P4	ribosomal protein S14 pseudogene 4 [Source:HGNC Symbol;Acc:HGNC:36419]	-0.276888	3.51004	-1.61875	0.133013	0.99919	-4.44403
ENSG00000198712	MT-CO2	mitochondrially encoded cytochrome c oxidase II [Source:HGNC Symbol;Acc:HGNC:7421]	-0.240025	12.7127	-1.61853	0.133058	0.99919	-4.4271
ENSG00000102871	TRADD	TNFRSF1A associated via death domain [Source:HGNC Symbol;Acc:HGNC:12030]	0.243947	3.87191	1.61845	0.133078	0.99919	-4.43255
ENSG00000166946	CCNDBP1	cyclin D1 binding protein 1 [Source:HGNC Symbol;Acc:HGNC:1587]	0.236011	4.5443	1.61792	0.133191	0.99919	-4.42027
ENSG00000158805	ZNF276	zinc finger protein 276 [Source:HGNC Symbol;Acc:HGNC:23330]	-0.190683	5.82695	-1.61449	0.133937	0.99919	-4.40966
ENSG00000148773	MKI67	marker of proliferation Ki-67 [Source:HGNC Symbol;Acc:HGNC:7107]	-0.283878	8.53713	-1.61364	0.134121	0.99919	-4.41217
ENSG00000197077	KIAA1671	KIAA1671 [Source:HGNC Symbol;Acc:HGNC:29345]	0.238527	5.0139	1.61323	0.134211	0.99919	-4.41571
ENSG00000263781	NA	NA	0.714436	0.450974	1.61298	0.134265	0.99919	-4.53068
ENSG00000011028	MRC2	mannose receptor C type 2 [Source:HGNC Symbol;Acc:HGNC:16875]	-0.242735	6.53312	-1.61233	0.134408	0.99919	-4.40832
ENSG00000105576	TNPO2	transportin 2 [Source:HGNC Symbol;Acc:HGNC:19998]	-0.463541	7.9733	-1.61225	0.134426	0.99919	-4.41055
ENSG00000105072	C19orf44	chromosome 19 open reading frame 44 [Source:HGNC Symbol;Acc:HGNC:26141]	-0.335203	1.90654	-1.61147	0.134597	0.99919	-4.49555
ENSG00000226328	NUP50-AS1	NUP50 antisense RNA 1 (head to head) [Source:HGNC Symbol;Acc:HGNC:50502]	0.266207	2.84915	1.61114	0.134669	0.99919	-4.46069
ENSG00000123095	BHLHE41	basic helix-loop-helix family member e41 [Source:HGNC Symbol;Acc:HGNC:16617]	-0.224098	5.70864	-1.6109	0.134721	0.99919	-4.4118
ENSG00000104885	DOT1L	DOT1 like histone lysine methyltransferase [Source:HGNC Symbol;Acc:HGNC:24948]	-0.237337	4.6271	-1.61066	0.134772	0.99919	-4.42356
ENSG00000213903	LTB4R	leukotriene B4 receptor [Source:HGNC Symbol;Acc:HGNC:6713]	-0.297762	6.25202	-1.61004	0.134909	0.99919	-4.40981
ENSG00000162654	GBP4	guanylate binding protein 4 [Source:HGNC Symbol;Acc:HGNC:20480]	0.586327	0.307898	1.60952	0.135023	0.99919	-4.5356
ENSG00000132952	USPL1	ubiquitin specific peptidase like 1 [Source:HGNC Symbol;Acc:HGNC:20294]	-0.28311	2.88629	-1.60931	0.135069	0.99919	-4.46469
ENSG00000196338	NLGN3	neuroligin 3 [Source:HGNC Symbol;Acc:HGNC:14289]	0.56588	-0.70682	1.609	0.135136	0.99919	-4.55573
ENSG00000198833	UBE2J1	ubiquitin conjugating enzyme E2 J1 [Source:HGNC Symbol;Acc:HGNC:17598]	0.255575	5.67509	1.6089	0.135158	0.99919	-4.41197
ENSG00000239763	NA	NA	-0.584306	0.0796253	-1.6081	0.135334	0.99919	-4.54783
ENSG00000174996	KLC2	kinesin light chain 2 [Source:HGNC Symbol;Acc:HGNC:20716]	-0.327342	3.9015	-1.6077	0.135421	0.99919	-4.43896
ENSG00000197150	ABCB8	ATP binding cassette subfamily B member 8 [Source:HGNC Symbol;Acc:HGNC:49]	0.293922	3.9731	1.60766	0.135431	0.99919	-4.43394
ENSG00000179958	DCTPP1	dCTP pyrophosphatase 1 [Source:HGNC Symbol;Acc:HGNC:28777]	-0.24721	6.19924	-1.60754	0.135457	0.99919	-4.41088
ENSG00000140459	CYP11A1	cytochrome P450 family 11 subfamily A member 1 [Source:HGNC Symbol;Acc:HGNC:2590]	0.507533	0.509952	1.60725	0.135521	0.99919	-4.53083
ENSG00000104361	NIPAL2	NIPA like domain containing 2 [Source:HGNC Symbol;Acc:HGNC:25854]	0.383305	2.45881	1.60679	0.135622	0.99919	-4.4726
ENSG00000224470	ATXN1L	ataxin 1 like [Source:HGNC Symbol;Acc:HGNC:33279]	0.290659	2.87975	1.6064	0.135709	0.99919	-4.46096
ENSG00000111666	CHPT1	choline phosphotransferase 1 [Source:HGNC Symbol;Acc:HGNC:17852]	0.20858	4.58624	1.60636	0.135716	0.99919	-4.42388
ENSG00000135114	OASL	2'-5'-oligoadenylate synthetase like [Source:HGNC Symbol;Acc:HGNC:8090]	0.490837	3.29714	1.60597	0.135803	0.99919	-4.44884
ENSG00000204160	ZDHHC18	zinc finger DHHC-type containing 18 [Source:HGNC Symbol;Acc:HGNC:20712]	0.20699	4.61711	1.60505	0.136007	0.99919	-4.42389
ENSG00000261061	NA	NA	0.2243	4.21669	1.60428	0.136176	0.99919	-4.43061
ENSG00000229320	KRT8P12	keratin 8 pseudogene 12 [Source:HGNC Symbol;Acc:HGNC:28057]	-0.624787	0.18361	-1.60393	0.136253	0.99919	-4.54629
ENSG00000264920	NA	NA	-0.339303	2.5822	-1.60381	0.136281	0.99919	-4.47468
ENSG00000166452	AKIP1	A-kinase interacting protein 1 [Source:HGNC Symbol;Acc:HGNC:1170]	-0.228773	5.70415	-1.60356	0.136335	0.99919	-4.41468
ENSG00000270362	HMGN3-AS1	HMGN3 antisense RNA 1 [Source:HGNC Symbol;Acc:HGNC:48984]	0.369098	1.24451	1.60354	0.13634	0.99919	-4.51152
ENSG00000083093	PALB2	partner and localizer of BRCA2 [Source:HGNC Symbol;Acc:HGNC:26144]	-0.357801	3.08827	-1.60347	0.136355	0.99919	-4.4607
ENSG00000137133	HINT2	histidine triad nucleotide binding protein 2 [Source:HGNC Symbol;Acc:HGNC:18344]	-0.214743	6.84814	-1.60303	0.136452	0.99919	-4.41191
ENSG00000086730	LAT2	linker for activation of T-cells family member 2 [Source:HGNC Symbol;Acc:HGNC:12749]	0.760168	-0.791282	1.60109	0.136881	0.99919	-4.55718
ENSG00000130734	ATG4D	autophagy related 4D cysteine peptidase [Source:HGNC Symbol;Acc:HGNC:20789]	0.30312	4.89356	1.60091	0.136922	0.99919	-4.42146
ENSG00000183010	PYCR1	pyrroline-5-carboxylate reductase 1 [Source:HGNC Symbol;Acc:HGNC:9721]	-0.304513	7.39259	-1.60042	0.137032	0.99919	-4.41371
ENSG00000186130	ZBTB6	zinc finger and BTB domain containing 6 [Source:HGNC Symbol;Acc:HGNC:16764]	0.457948	1.80722	1.59962	0.13721	0.99919	-4.49403
ENSG00000181135	ZNF707	zinc finger protein 707 [Source:HGNC Symbol;Acc:HGNC:27815]	-0.300558	2.75049	-1.59904	0.137338	0.99919	-4.47165
ENSG00000187867	PALM3	paralemmin 3 [Source:HGNC Symbol;Acc:HGNC:33274]	-0.589588	0.488542	-1.59883	0.137384	0.99919	-4.53941
ENSG00000013573	DDX11	DEAD/H-box helicase 11 [Source:HGNC Symbol;Acc:HGNC:2736]	-0.357976	5.41278	-1.59875	0.137402	0.99919	-4.41898
ENSG00000242527	NA	NA	0.822316	-0.0528668	1.59868	0.137419	0.99919	-4.54394
ENSG00000248367	NA	NA	0.386859	2.18204	1.59864	0.137427	0.99919	-4.48328
ENSG00000188522	FAM83G	family with sequence similarity 83 member G [Source:HGNC Symbol;Acc:HGNC:32554]	-0.414319	3.91708	-1.59862	0.137431	0.99919	-4.44222
ENSG00000158545	ZC3H18	zinc finger CCCH-type containing 18 [Source:HGNC Symbol;Acc:HGNC:25091]	-0.404941	6.68763	-1.59817	0.137533	0.99919	-4.41391
ENSG00000176714	CCDC121	coiled-coil domain containing 121 [Source:HGNC Symbol;Acc:HGNC:25833]	0.580393	-0.528216	1.59804	0.137561	0.99919	-4.55376
ENSG00000160570	DEDD2	death effector domain containing 2 [Source:HGNC Symbol;Acc:HGNC:24450]	0.234834	4.11037	1.59771	0.137636	0.99919	-4.43473
ENSG00000182518	FAM104B	family with sequence similarity 104 member B [Source:HGNC Symbol;Acc:HGNC:25085]	-0.394423	5.23536	-1.59753	0.137674	0.99919	-4.42116
ENSG00000272948	NA	NA	-0.433179	1.14003	-1.59751	0.137679	0.99919	-4.52106
ENSG00000165959	CLMN	calmin [Source:HGNC Symbol;Acc:HGNC:19972]	0.326657	5.89445	1.59678	0.137842	0.99919	-4.41564
ENSG00000163449	TMEM169	transmembrane protein 169 [Source:HGNC Symbol;Acc:HGNC:25130]	-0.452247	0.981841	-1.59655	0.137892	0.99919	-4.52629
ENSG00000100426	ZBED4	zinc finger BED-type containing 4 [Source:HGNC Symbol;Acc:HGNC:20721]	-0.264232	3.45819	-1.59646	0.137914	0.99919	-4.45212
ENSG00000109606	DHX15	DEAH-box helicase 15 [Source:HGNC Symbol;Acc:HGNC:2738]	-0.241843	4.86423	-1.59634	0.137941	0.99919	-4.42528
ENSG00000183621	ZNF438	zinc finger protein 438 [Source:HGNC Symbol;Acc:HGNC:21029]	-0.272926	3.74873	-1.59612	0.137991	0.99919	-4.44553
ENSG00000124155	PIGT	phosphatidylinositol glycan anchor biosynthesis class T [Source:HGNC Symbol;Acc:HGNC:14938]	-0.285444	9.35421	-1.59582	0.138057	0.99919	-4.42206
ENSG00000154162	CDH12	cadherin 12 [Source:HGNC Symbol;Acc:HGNC:1751]	0.504266	0.0667198	1.59577	0.138068	0.99919	-4.54265
ENSG00000234745	HLA-B	major histocompatibility complex, class I, B [Source:HGNC Symbol;Acc:HGNC:4932]	0.2421	8.80416	1.59554	0.13812	0.99919	-4.42059
ENSG00000267317	NA	NA	-0.196826	6.13026	-1.59552	0.138124	0.99919	-4.41575
ENSG00000134897	BIVM	basic, immunoglobulin-like variable motif containing [Source:HGNC Symbol;Acc:HGNC:16034]	-0.23793	5.67186	-1.59508	0.138221	0.99919	-4.41815
ENSG00000172456	FGGY	FGGY carbohydrate kinase domain containing [Source:HGNC Symbol;Acc:HGNC:25610]	0.347493	3.54285	1.59463	0.138324	0.99919	-4.44679
ENSG00000178927	C17orf62	chromosome 17 open reading frame 62 [Source:HGNC Symbol;Acc:HGNC:28672]	0.240553	4.6111	1.59436	0.138383	0.99919	-4.42768
ENSG00000247157	LINC01252	long intergenic non-protein coding RNA 1252 [Source:HGNC Symbol;Acc:HGNC:27888]	0.436571	0.290091	1.59418	0.138425	0.99919	-4.53852
ENSG00000157557	ETS2	ETS proto-oncogene 2, transcription factor [Source:HGNC Symbol;Acc:HGNC:3489]	0.366554	2.93206	1.5937	0.138531	0.99919	-4.4624
ENSG00000198131	ZNF544	zinc finger protein 544 [Source:HGNC Symbol;Acc:HGNC:16759]	-0.213285	5.1344	-1.59322	0.13864	0.99919	-4.42318
ENSG00000273352	NA	NA	-0.415244	0.652306	-1.59317	0.13865	0.99919	-4.535
ENSG00000149599	DUSP15	dual specificity phosphatase 15 [Source:HGNC Symbol;Acc:HGNC:16236]	-0.819213	0.115696	-1.59282	0.13873	0.99919	-4.54873
ENSG00000198873	GRK5	G protein-coupled receptor kinase 5 [Source:HGNC Symbol;Acc:HGNC:4544]	0.243399	3.41321	1.59281	0.13873	0.99919	-4.45114
ENSG00000149016	TUT1	terminal uridylyl transferase 1, U6 snRNA-specific [Source:HGNC Symbol;Acc:HGNC:26184]	0.422381	3.44167	1.59234	0.138838	0.99919	-4.44956
ENSG00000247828	TMEM161B-AS1	TMEM161B antisense RNA 1 [Source:HGNC Symbol;Acc:HGNC:43839]	0.307203	4.54397	1.59227	0.138851	0.99919	-4.42914
ENSG00000206828	NA	U1 spliceosomal RNA [Source:RFAM;Acc:RF00003]	-0.294097	2.80096	-1.59192	0.13893	0.99919	-4.47182
ENSG00000240990	HOXA11-AS	HOXA11 antisense RNA [Source:HGNC Symbol;Acc:HGNC:24957]	0.27957	3.09589	1.59151	0.139024	0.99919	-4.45946
ENSG00000089009	RPL6	ribosomal protein L6 [Source:HGNC Symbol;Acc:HGNC:10362]	0.382486	6.88793	1.59127	0.139078	0.99919	-4.41672
ENSG00000166860	ZBTB39	zinc finger and BTB domain containing 39 [Source:HGNC Symbol;Acc:HGNC:29014]	-0.463907	1.08968	-1.59038	0.139278	0.99919	-4.52466
ENSG00000137171	KLC4	kinesin light chain 4 [Source:HGNC Symbol;Acc:HGNC:21624]	0.339762	2.31676	1.58974	0.139422	0.99919	-4.48133
ENSG00000060982	BCAT1	branched chain amino acid transaminase 1 [Source:HGNC Symbol;Acc:HGNC:976]	0.641417	-0.547956	1.58969	0.139432	0.99919	-4.55491
ENSG00000136933	RABEPK	Rab9 effector protein with kelch motifs [Source:HGNC Symbol;Acc:HGNC:16896]	-0.234219	6.37553	-1.58964	0.139444	0.99919	-4.41747
ENSG00000154917	RAB6B	RAB6B, member RAS oncogene family [Source:HGNC Symbol;Acc:HGNC:14902]	0.271294	4.18935	1.5895	0.139476	0.99919	-4.43595
ENSG00000160345	C9orf116	chromosome 9 open reading frame 116 [Source:HGNC Symbol;Acc:HGNC:28435]	-0.234051	3.86667	-1.58949	0.139479	0.99919	-4.44479
ENSG00000214655	ZSWIM8	zinc finger SWIM-type containing 8 [Source:HGNC Symbol;Acc:HGNC:23528]	-0.39175	4.5813	-1.58944	0.13949	0.99919	-4.43247
ENSG00000125656	CLPP	caseinolytic mitochondrial matrix peptidase proteolytic subunit [Source:HGNC Symbol;Acc:HGNC:2084]	-0.331215	7.60689	-1.58903	0.139582	0.99919	-4.41865
ENSG00000110080	ST3GAL4	ST3 beta-galactoside alpha-2,3-sialyltransferase 4 [Source:HGNC Symbol;Acc:HGNC:10864]	-0.350548	2.58883	-1.58618	0.140226	0.99919	-4.47941
ENSG00000279977	NA	NA	-0.455156	3.74624	-1.58569	0.140337	0.99919	-4.44962
ENSG00000185090	MANEAL	mannosidase endo-alpha like [Source:HGNC Symbol;Acc:HGNC:26452]	0.379796	5.34859	1.58553	0.140374	0.99919	-4.42288
ENSG00000119669	IRF2BPL	interferon regulatory factor 2 binding protein like [Source:HGNC Symbol;Acc:HGNC:14282]	-0.496139	6.15663	-1.58539	0.140406	0.99919	-4.42001
ENSG00000125779	PANK2	pantothenate kinase 2 [Source:HGNC Symbol;Acc:HGNC:15894]	-0.230981	6.36765	-1.58505	0.140484	0.99919	-4.41928
ENSG00000133028	SCO1	SCO1 cytochrome c oxidase assembly protein [Source:HGNC Symbol;Acc:HGNC:10603]	-0.17937	6.70072	-1.58493	0.14051	0.99919	-4.41899
ENSG00000163931	TKT	transketolase [Source:HGNC Symbol;Acc:HGNC:11834]	-0.482471	7.99002	-1.58381	0.140766	0.99919	-4.42162
ENSG00000119684	MLH3	mutL homolog 3 [Source:HGNC Symbol;Acc:HGNC:7128]	0.251705	4.56831	1.58365	0.140801	0.99919	-4.43211
ENSG00000164332	UBLCP1	ubiquitin like domain containing CTD phosphatase 1 [Source:HGNC Symbol;Acc:HGNC:28110]	-0.233591	4.3686	-1.58337	0.140866	0.99919	-4.43718
ENSG00000233429	HOTAIRM1	HOXA transcript antisense RNA, myeloid-specific 1 [Source:HGNC Symbol;Acc:HGNC:37117]	-0.83767	-0.0630245	-1.58323	0.140896	0.99919	-4.55427
ENSG00000133872	SARAF	store-operated calcium entry associated regulatory factor [Source:HGNC Symbol;Acc:HGNC:28789]	0.221212	6.62122	1.5831	0.140928	0.99919	-4.41966
ENSG00000180834	MAP6D1	MAP6 domain containing 1 [Source:HGNC Symbol;Acc:HGNC:25753]	-0.264947	3.63567	-1.58303	0.140943	0.99919	-4.45223
ENSG00000167315	ACAA2	acetyl-CoA acyltransferase 2 [Source:HGNC Symbol;Acc:HGNC:83]	0.257929	5.95038	1.58287	0.140979	0.99919	-4.4209
ENSG00000265692	NA	NA	-0.704207	0.317031	-1.58284	0.140986	0.99919	-4.54707
ENSG00000133805	AMPD3	adenosine monophosphate deaminase 3 [Source:HGNC Symbol;Acc:HGNC:470]	0.339733	2.06732	1.58279	0.140997	0.99919	-4.4904
ENSG00000185220	PGBD2	piggyBac transposable element derived 2 [Source:HGNC Symbol;Acc:HGNC:19399]	-0.428793	0.783711	-1.58252	0.141059	0.99919	-4.53288
ENSG00000204237	OXLD1	oxidoreductase like domain containing 1 [Source:HGNC Symbol;Acc:HGNC:27901]	0.25214	4.67439	1.58244	0.141076	0.99919	-4.43116
ENSG00000150867	PIP4K2A	phosphatidylinositol-5-phosphate 4-kinase type 2 alpha [Source:HGNC Symbol;Acc:HGNC:8997]	0.278328	3.67471	1.58217	0.141138	0.99919	-4.44817
ENSG00000164442	CITED2	Cbp/p300 interacting transactivator with Glu/Asp rich carboxy-terminal domain 2 [Source:HGNC Symbol;Acc:HGNC:1987]	0.268015	5.2981	1.58204	0.141169	0.99919	-4.42476
ENSG00000124882	EREG	epiregulin [Source:HGNC Symbol;Acc:HGNC:3443]	-0.309462	5.70935	-1.58196	0.141187	0.99919	-4.42312
ENSG00000163703	CRELD1	cysteine rich with EGF like domains 1 [Source:HGNC Symbol;Acc:HGNC:14630]	0.378916	2.67163	1.58156	0.141277	0.99919	-4.47261
ENSG00000115317	HTRA2	HtrA serine peptidase 2 [Source:HGNC Symbol;Acc:HGNC:14348]	0.231672	5.10571	1.58145	0.141302	0.99919	-4.42668
ENSG00000130270	ATP8B3	ATPase phospholipid transporting 8B3 [Source:HGNC Symbol;Acc:HGNC:13535]	-0.293055	5.55696	-1.58142	0.141309	0.99919	-4.42427
ENSG00000155545	MIER3	MIER family member 3 [Source:HGNC Symbol;Acc:HGNC:26678]	-0.26572	3.42553	-1.58137	0.141321	0.99919	-4.45763
ENSG00000172409	CLP1	cleavage and polyadenylation factor I subunit 1 [Source:HGNC Symbol;Acc:HGNC:16999]	0.353934	1.8419	1.58131	0.141336	0.99919	-4.49747
ENSG00000049769	PPP1R3F	protein phosphatase 1 regulatory subunit 3F [Source:HGNC Symbol;Acc:HGNC:14944]	0.379974	3.96954	1.58086	0.141437	0.99919	-4.44236
ENSG00000152475	ZNF837	zinc finger protein 837 [Source:HGNC Symbol;Acc:HGNC:25164]	0.394577	1.12301	1.58067	0.141482	0.99919	-4.51914
ENSG00000162144	CYB561A3	cytochrome b561 family member A3 [Source:HGNC Symbol;Acc:HGNC:23014]	0.237411	4.93079	1.58033	0.141558	0.99919	-4.42887
ENSG00000197965	MPZL1	myelin protein zero like 1 [Source:HGNC Symbol;Acc:HGNC:7226]	0.196232	6.31897	1.5796	0.141725	0.99919	-4.42127
ENSG00000177133	LINC00982	long intergenic non-protein coding RNA 982 [Source:HGNC Symbol;Acc:HGNC:48664]	0.297111	1.83268	1.57907	0.141846	0.99919	-4.4987
ENSG00000101084	C20orf24	chromosome 20 open reading frame 24 [Source:HGNC Symbol;Acc:HGNC:15870]	0.24613	5.03695	1.57899	0.141864	0.99919	-4.42826
ENSG00000213885	RPL13AP7	ribosomal protein L13a pseudogene 7 [Source:HGNC Symbol;Acc:HGNC:23755]	0.341294	1.95261	1.57882	0.141904	0.99919	-4.49474
ENSG00000244701	NA	NA	0.502691	0.794385	1.57828	0.142028	0.99919	-4.52719
ENSG00000145908	ZNF300	zinc finger protein 300 [Source:HGNC Symbol;Acc:HGNC:13091]	-0.330365	4.12731	-1.57819	0.142049	0.99919	-4.44396
ENSG00000226137	BAIAP2-AS1	BAIAP2 antisense RNA 1 (head to head) [Source:HGNC Symbol;Acc:HGNC:44342]	-0.435192	3.6895	-1.57787	0.142122	0.99919	-4.45371
ENSG00000105982	RNF32	ring finger protein 32 [Source:HGNC Symbol;Acc:HGNC:17118]	0.409241	1.30506	1.57777	0.142145	0.99919	-4.51342
ENSG00000156011	PSD3	pleckstrin and Sec7 domain containing 3 [Source:HGNC Symbol;Acc:HGNC:19093]	0.225264	5.69987	1.57757	0.142191	0.99919	-4.42402
ENSG00000106771	TMEM245	transmembrane protein 245 [Source:HGNC Symbol;Acc:HGNC:1363]	0.21899	6.96386	1.57728	0.142258	0.99919	-4.42224
ENSG00000278023	RDM1	RAD52 motif containing 1 [Source:HGNC Symbol;Acc:HGNC:19950]	-0.401187	4.1261	-1.57546	0.142676	0.99919	-4.44531
ENSG00000124782	RREB1	ras responsive element binding protein 1 [Source:HGNC Symbol;Acc:HGNC:10449]	-0.203555	4.32471	-1.57543	0.142683	0.99919	-4.44047
ENSG00000170846	NA	NA	0.227709	3.42663	1.57503	0.142774	0.99919	-4.45633
ENSG00000125744	RTN2	reticulon 2 [Source:HGNC Symbol;Acc:HGNC:10468]	0.439536	0.955137	1.57493	0.142799	0.99919	-4.52409
ENSG00000101003	GINS1	GINS complex subunit 1 [Source:HGNC Symbol;Acc:HGNC:28980]	-0.19936	5.23676	-1.57489	0.142807	0.99919	-4.42895
ENSG00000068903	SIRT2	sirtuin 2 [Source:HGNC Symbol;Acc:HGNC:10886]	0.246866	5.24498	1.57461	0.142871	0.99919	-4.42802
ENSG00000136279	DBNL	drebrin like [Source:HGNC Symbol;Acc:HGNC:2696]	0.204648	6.22874	1.574	0.143013	0.99919	-4.42363
ENSG00000094841	UPRT	uracil phosphoribosyltransferase homolog [Source:HGNC Symbol;Acc:HGNC:28334]	0.304238	3.67775	1.57397	0.143019	0.99919	-4.45063
ENSG00000156531	PHF6	PHD finger protein 6 [Source:HGNC Symbol;Acc:HGNC:18145]	0.224405	5.34788	1.57363	0.143098	0.99919	-4.42764
ENSG00000130935	NOL11	nucleolar protein 11 [Source:HGNC Symbol;Acc:HGNC:24557]	-0.224384	7.82344	-1.57356	0.143114	0.99919	-4.42525
ENSG00000182446	NPLOC4	NPL4 homolog, ubiquitin recognition factor [Source:HGNC Symbol;Acc:HGNC:18261]	0.220951	6.7001	1.57305	0.14323	0.99919	-4.42362
ENSG00000129128	SPCS3	signal peptidase complex subunit 3 [Source:HGNC Symbol;Acc:HGNC:26212]	0.22136	6.95196	1.57256	0.143344	0.99919	-4.42407
ENSG00000096384	HSP90AB1	heat shock protein 90 alpha family class B member 1 [Source:HGNC Symbol;Acc:HGNC:5258]	-0.330899	11.4751	-1.57224	0.143419	0.99919	-4.43834
ENSG00000178977	LINC00324	long intergenic non-protein coding RNA 324 [Source:HGNC Symbol;Acc:HGNC:26628]	0.389122	2.44049	1.57205	0.143463	0.99919	-4.48202
ENSG00000262587	NA	NA	0.327562	1.78034	1.57187	0.143504	0.99919	-4.50144
ENSG00000225193	RPS12P26	ribosomal protein S12 pseudogene 26 [Source:HGNC Symbol;Acc:HGNC:36320]	0.581566	0.800333	1.57133	0.143628	0.99919	-4.52862
ENSG00000144645	OSBPL10	oxysterol binding protein like 10 [Source:HGNC Symbol;Acc:HGNC:16395]	0.379336	0.805449	1.5713	0.143636	0.99919	-4.52834
ENSG00000138593	SECISBP2L	SECIS binding protein 2 like [Source:HGNC Symbol;Acc:HGNC:28997]	-0.374868	4.21883	-1.57101	0.143703	0.99919	-4.44492
ENSG00000173991	TCAP	titin-cap [Source:HGNC Symbol;Acc:HGNC:11610]	-0.754128	1.48265	-1.57087	0.143736	0.99919	-4.51899
ENSG00000065491	TBC1D22B	TBC1 domain family member 22B [Source:HGNC Symbol;Acc:HGNC:21602]	-0.316582	3.48931	-1.57069	0.143777	0.99919	-4.45952
ENSG00000127928	GNGT1	G protein subunit gamma transducin 1 [Source:HGNC Symbol;Acc:HGNC:4411]	0.401582	0.520801	1.57005	0.143925	0.99919	-4.53591
ENSG00000102984	ZNF821	zinc finger protein 821 [Source:HGNC Symbol;Acc:HGNC:28043]	0.336819	2.57495	1.56919	0.144125	0.99919	-4.47893
ENSG00000177663	IL17RA	interleukin 17 receptor A [Source:HGNC Symbol;Acc:HGNC:5985]	-0.241081	5.73183	-1.56838	0.144312	0.99919	-4.42808
ENSG00000237238	BMS1P10	BMS1, ribosome biogenesis factor pseudogene 10 [Source:HGNC Symbol;Acc:HGNC:49154]	-1.63292	-1.12554	-1.56834	0.144323	0.99919	-4.57111
ENSG00000272936	NA	NA	-0.569849	0.0305947	-1.56811	0.144377	0.99919	-4.55193
ENSG00000138660	AP1AR	adaptor related protein complex 1 associated regulatory protein [Source:HGNC Symbol;Acc:HGNC:28808]	-0.333178	4.19844	-1.56802	0.144396	0.99919	-4.44572
ENSG00000272711	NA	NA	-0.29752	2.85083	-1.56799	0.144404	0.99919	-4.47614
ENSG00000180340	FZD2	frizzled class receptor 2 [Source:HGNC Symbol;Acc:HGNC:4040]	0.274238	3.70843	1.56727	0.144572	0.99919	-4.45222
ENSG00000086712	TXLNG	taxilin gamma [Source:HGNC Symbol;Acc:HGNC:18578]	-0.233325	5.28447	-1.56724	0.144578	0.99919	-4.43153
ENSG00000133119	RFC3	replication factor C subunit 3 [Source:HGNC Symbol;Acc:HGNC:9971]	-0.40102	5.12117	-1.5671	0.14461	0.99919	-4.43365
ENSG00000234509	NA	NA	0.55881	-0.111674	1.56665	0.144715	0.99919	-4.54906
ENSG00000166924	NYAP1	neuronal tyrosine phosphorylated phosphoinositide-3-kinase adaptor 1 [Source:HGNC Symbol;Acc:HGNC:22009]	0.473237	-0.097654	1.56541	0.145005	0.99919	-4.54951
ENSG00000136197	C7orf25	chromosome 7 open reading frame 25 [Source:HGNC Symbol;Acc:HGNC:21703]	0.585136	-0.062698	1.56496	0.145111	0.99919	-4.54768
ENSG00000123131	PRDX4	peroxiredoxin 4 [Source:HGNC Symbol;Acc:HGNC:17169]	0.235242	7.18566	1.5648	0.145146	0.99919	-4.42745
ENSG00000176715	ACSF3	acyl-CoA synthetase family member 3 [Source:HGNC Symbol;Acc:HGNC:27288]	0.254308	3.8503	1.56449	0.145219	0.99919	-4.45054
ENSG00000100949	RABGGTA	Rab geranylgeranyltransferase alpha subunit [Source:HGNC Symbol;Acc:HGNC:9795]	-0.243111	4.34479	-1.56368	0.14541	0.99919	-4.44447
ENSG00000133789	SWAP70	SWAP switching B-cell complex 70kDa subunit [Source:HGNC Symbol;Acc:HGNC:17070]	0.280414	4.21136	1.56366	0.145414	0.99919	-4.44436
ENSG00000121578	B4GALT4	beta-1,4-galactosyltransferase 4 [Source:HGNC Symbol;Acc:HGNC:927]	0.393696	3.98587	1.56352	0.145448	0.99919	-4.44776
ENSG00000145990	GFOD1	glucose-fructose oxidoreductase domain containing 1 [Source:HGNC Symbol;Acc:HGNC:21096]	-0.236952	3.67071	-1.56291	0.145589	0.99919	-4.45736
ENSG00000180879	SSR4	signal sequence receptor subunit 4 [Source:HGNC Symbol;Acc:HGNC:11326]	0.276731	7.64468	1.56273	0.145632	0.99919	-4.42927
ENSG00000115484	CCT4	chaperonin containing TCP1 subunit 4 [Source:HGNC Symbol;Acc:HGNC:1617]	-0.187365	9.46435	-1.56234	0.145723	0.99919	-4.43498
ENSG00000112695	COX7A2	cytochrome c oxidase subunit 7A2 [Source:HGNC Symbol;Acc:HGNC:2288]	0.403063	7.98935	1.56221	0.145754	0.99919	-4.43057
ENSG00000204623	ZNRD1ASP	zinc ribbon domain containing 1 antisense, pseudogene [Source:HGNC Symbol;Acc:HGNC:13924]	0.239407	2.88879	1.56188	0.145832	0.99919	-4.47313
ENSG00000197969	VPS13A	vacuolar protein sorting 13 homolog A [Source:HGNC Symbol;Acc:HGNC:1908]	-0.266564	4.58335	-1.56178	0.145854	0.99919	-4.44155
ENSG00000281005	LINC00921	long intergenic non-protein coding RNA 921 [Source:HGNC Symbol;Acc:HGNC:26830]	-0.479052	-0.036029	-1.56175	0.145861	0.99919	-4.55236
ENSG00000165732	DDX21	DEAD-box helicase 21 [Source:HGNC Symbol;Acc:HGNC:2744]	-0.190716	9.11662	-1.5615	0.14592	0.99919	-4.4341
ENSG00000261236	BOP1	block of proliferation 1 [Source:HGNC Symbol;Acc:HGNC:15519]	-0.210632	6.10984	-1.56105	0.146027	0.99919	-4.42926
ENSG00000183186	C2CD4C	C2 calcium dependent domain containing 4C [Source:HGNC Symbol;Acc:HGNC:29417]	-0.533808	1.54543	-1.5595	0.146391	0.99919	-4.51766
ENSG00000138760	SCARB2	scavenger receptor class B member 2 [Source:HGNC Symbol;Acc:HGNC:1665]	0.219227	5.7261	1.55893	0.146524	0.99919	-4.43108
ENSG00000260912	NA	NA	-0.306324	2.54526	-1.55885	0.146544	0.99919	-4.48694
ENSG00000167468	GPX4	glutathione peroxidase 4 [Source:HGNC Symbol;Acc:HGNC:4556]	0.277763	7.42096	1.55815	0.146708	0.99919	-4.4305
ENSG00000164236	ANKRD33B	ankyrin repeat domain 33B [Source:HGNC Symbol;Acc:HGNC:35240]	0.425058	2.91447	1.55801	0.146742	0.99919	-4.4725
ENSG00000099377	HSD3B7	hydroxy-delta-5-steroid dehydrogenase, 3 beta- and steroid delta-isomerase 7 [Source:HGNC Symbol;Acc:HGNC:18324]	0.244102	4.68504	1.55782	0.146787	0.99919	-4.43986
ENSG00000204052	LRRC73	leucine rich repeat containing 73 [Source:HGNC Symbol;Acc:HGNC:21375]	-0.274269	3.36371	-1.55747	0.146868	0.99919	-4.46599
ENSG00000063245	EPN1	epsin 1 [Source:HGNC Symbol;Acc:HGNC:21604]	-0.376368	5.65849	-1.55703	0.146973	0.99919	-4.43312
ENSG00000167967	E4F1	E4F transcription factor 1 [Source:HGNC Symbol;Acc:HGNC:3121]	0.3679	4.06064	1.55622	0.147163	0.99919	-4.44922
ENSG00000101407	TTI1	TELO2 interacting protein 1 [Source:HGNC Symbol;Acc:HGNC:29029]	-0.258644	4.93736	-1.55557	0.147318	0.99919	-4.43925
ENSG00000144566	RAB5A	RAB5A, member RAS oncogene family [Source:HGNC Symbol;Acc:HGNC:9783]	-0.238993	6.54785	-1.55543	0.14735	0.99919	-4.43064
ENSG00000167646	DNAAF3	dynein axonemal assembly factor 3 [Source:HGNC Symbol;Acc:HGNC:30492]	-0.389444	0.819651	-1.55496	0.147462	0.99919	-4.53573
ENSG00000228451	SDAD1P1	SDA1 domain containing 1 pseudogene 1 [Source:HGNC Symbol;Acc:HGNC:31403]	0.49973	0.702313	1.55475	0.147511	0.99919	-4.53339
ENSG00000173068	BNC2	basonuclin 2 [Source:HGNC Symbol;Acc:HGNC:30988]	0.267808	2.72911	1.55383	0.14773	0.99919	-4.47916
ENSG00000279329	NA	NA	0.548105	-0.407677	1.55361	0.147782	0.99919	-4.55551
ENSG00000165916	PSMC3	proteasome 26S subunit, ATPase 3 [Source:HGNC Symbol;Acc:HGNC:9549]	0.26062	7.14412	1.55339	0.147835	0.99919	-4.43184
ENSG00000274349	ZNF658	zinc finger protein 658 [Source:HGNC Symbol;Acc:HGNC:25226]	0.650439	-0.639582	1.55293	0.147944	0.99919	-4.55913
ENSG00000169213	RAB3B	RAB3B, member RAS oncogene family [Source:HGNC Symbol;Acc:HGNC:9778]	-0.342705	1.29646	-1.55282	0.14797	0.99919	-4.52289
ENSG00000223653	NA	NA	0.496229	0.0377658	1.55253	0.148037	0.99919	-4.54791
ENSG00000119688	ABCD4	ATP binding cassette subfamily D member 4 [Source:HGNC Symbol;Acc:HGNC:68]	0.304629	4.52824	1.55229	0.148096	0.99919	-4.44362
ENSG00000143740	SNAP47	synaptosome associated protein 47 [Source:HGNC Symbol;Acc:HGNC:30669]	0.217993	4.40203	1.55221	0.148115	0.99919	-4.44565
ENSG00000267322	SNHG22	small nucleolar RNA host gene 22 [Source:HGNC Symbol;Acc:HGNC:50285]	0.58137	-0.00107376	1.5522	0.148117	0.99919	-4.54808
ENSG00000143919	CAMKMT	calmodulin-lysine N-methyltransferase [Source:HGNC Symbol;Acc:HGNC:26276]	-0.294712	2.7102	-1.55214	0.148131	0.99919	-4.48405
ENSG00000280163	NA	NA	-1.27819	-0.89708	-1.55199	0.148168	0.99919	-4.56932
ENSG00000244021	NA	NA	0.594176	0.54426	1.55176	0.148222	0.99919	-4.53707
ENSG00000251396	LINC01301	long intergenic non-protein coding RNA 1301 [Source:HGNC Symbol;Acc:HGNC:50464]	0.606432	-0.00295594	1.55163	0.148251	0.99919	-4.54804
ENSG00000117407	ARTN	artemin [Source:HGNC Symbol;Acc:HGNC:727]	-0.354267	2.56766	-1.55054	0.148511	0.99919	-4.48869
ENSG00000280374	NA	NA	0.341453	1.54888	1.55051	0.148519	0.99919	-4.51195
ENSG00000273329	NA	NA	0.285509	3.21108	1.55038	0.148549	0.99919	-4.46806
ENSG00000183032	SLC25A21	solute carrier family 25 member 21 [Source:HGNC Symbol;Acc:HGNC:14411]	0.462137	0.242517	1.55038	0.14855	0.99919	-4.54468
ENSG00000278817	NA	NA	0.337004	2.29593	1.55015	0.148604	0.99919	-4.49119
ENSG00000114395	CYB561D2	cytochrome b561 family member D2 [Source:HGNC Symbol;Acc:HGNC:30253]	-0.266395	3.7736	-1.54998	0.148646	0.99919	-4.4595
ENSG00000165288	BRWD3	bromodomain and WD repeat domain containing 3 [Source:HGNC Symbol;Acc:HGNC:17342]	-0.240001	4.60022	-1.54961	0.148733	0.99919	-4.44552
ENSG00000005243	COPZ2	coatomer protein complex subunit zeta 2 [Source:HGNC Symbol;Acc:HGNC:19356]	0.329276	2.93971	1.54892	0.148898	0.99919	-4.4746
ENSG00000164574	GALNT10	polypeptide N-acetylgalactosaminyltransferase 10 [Source:HGNC Symbol;Acc:HGNC:19873]	-0.205931	5.03072	-1.54836	0.149032	0.99919	-4.44076
ENSG00000078061	ARAF	A-Raf proto-oncogene, serine/threonine kinase [Source:HGNC Symbol;Acc:HGNC:646]	0.227885	4.4902	1.54831	0.149044	0.99919	-4.44573
ENSG00000138663	COPS4	COP9 signalosome subunit 4 [Source:HGNC Symbol;Acc:HGNC:16702]	-0.217107	3.91489	-1.54735	0.149274	0.99919	-4.45714
ENSG00000180089	TMEM86B	transmembrane protein 86B [Source:HGNC Symbol;Acc:HGNC:28448]	-0.367735	3.56334	-1.5471	0.149335	0.99919	-4.46459
ENSG00000125459	MSTO1	misato 1, mitochondrial distribution and morphology regulator [Source:HGNC Symbol;Acc:HGNC:29678]	-0.396642	3.23268	-1.54661	0.14945	0.99919	-4.47337
ENSG00000113558	SKP1	S-phase kinase-associated protein 1 [Source:HGNC Symbol;Acc:HGNC:10899]	-0.250608	9.18015	-1.54639	0.149505	0.99919	-4.43989
ENSG00000089818	NECAP1	NECAP endocytosis associated 1 [Source:HGNC Symbol;Acc:HGNC:24539]	-0.376489	3.95633	-1.54625	0.149536	0.99919	-4.4576
ENSG00000186832	KRT16	keratin 16 [Source:HGNC Symbol;Acc:HGNC:6423]	-0.210082	5.78446	-1.54592	0.149617	0.99919	-4.43636
ENSG00000143384	MCL1	BCL2 family apoptosis regulator [Source:HGNC Symbol;Acc:HGNC:6943]	-0.223052	8.4028	-1.54511	0.149812	0.99919	-4.43787
ENSG00000184678	HIST2H2BE	histone cluster 2, H2be [Source:HGNC Symbol;Acc:HGNC:4760]	0.334517	3.59222	1.54381	0.150124	0.99919	-4.46169
ENSG00000140691	ARMC5	armadillo repeat containing 5 [Source:HGNC Symbol;Acc:HGNC:25781]	0.276938	4.65168	1.54378	0.15013	0.99919	-4.44516
ENSG00000162377	COA7	cytochrome c oxidase assembly factor 7 (putative) [Source:HGNC Symbol;Acc:HGNC:25716]	-0.207219	5.69096	-1.54359	0.150175	0.99919	-4.4377
ENSG00000183207	RUVBL2	RuvB like AAA ATPase 2 [Source:HGNC Symbol;Acc:HGNC:10475]	0.28859	6.29886	1.54342	0.150218	0.99919	-4.4354
ENSG00000115970	THADA	THADA, armadillo repeat containing [Source:HGNC Symbol;Acc:HGNC:19217]	-0.305319	6.10324	-1.54325	0.150259	0.99919	-4.43628
ENSG00000276406	NA	NA	0.727989	-1.11669	1.54291	0.150341	0.99919	-4.56546
ENSG00000158856	DMTN	dematin actin binding protein [Source:HGNC Symbol;Acc:HGNC:3382]	-0.491026	3.7304	-1.54246	0.150448	0.99919	-4.46407
ENSG00000092871	RFFL	ring finger and FYVE-like domain containing E3 ubiquitin protein ligase [Source:HGNC Symbol;Acc:HGNC:24821]	-0.245707	5.03146	-1.54236	0.150472	0.99919	-4.44313
ENSG00000212664	NA	NA	0.404033	2.89695	1.54223	0.150504	0.99919	-4.47702
ENSG00000164096	C4orf3	chromosome 4 open reading frame 3 [Source:HGNC Symbol;Acc:HGNC:19225]	0.254519	5.34219	1.54163	0.150649	0.99919	-4.43972
ENSG00000275703	NA	NA	0.644051	-0.610178	1.54156	0.150665	0.99919	-4.55946
ENSG00000189046	ALKBH2	alkB homolog 2, alpha-ketoglutarate dependent dioxygenase [Source:HGNC Symbol;Acc:HGNC:32487]	-0.229691	4.12055	-1.54083	0.150843	0.99919	-4.45562
ENSG00000172301	COPRS	coordinator of PRMT5 and differentiation stimulator [Source:HGNC Symbol;Acc:HGNC:28848]	-0.270165	7.18242	-1.54006	0.151028	0.99919	-4.43687
ENSG00000038002	AGA	aspartylglucosaminidase [Source:HGNC Symbol;Acc:HGNC:318]	0.297684	4.64722	1.53957	0.151147	0.99919	-4.44669
ENSG00000260778	MIR940	microRNA 940 [Source:HGNC Symbol;Acc:HGNC:33683]	0.4261	1.26155	1.5388	0.151334	0.99919	-4.52118
ENSG00000120071	KANSL1	KAT8 regulatory NSL complex subunit 1 [Source:HGNC Symbol;Acc:HGNC:24565]	-0.345754	5.27299	-1.53847	0.151413	0.99919	-4.44267
ENSG00000103266	STUB1	STIP1 homology and U-box containing protein 1 [Source:HGNC Symbol;Acc:HGNC:11427]	-0.442162	6.34655	-1.53818	0.151483	0.99919	-4.43778
ENSG00000272068	NA	NA	-0.272954	4.90132	-1.53817	0.151485	0.99919	-4.44601
ENSG00000169499	PLEKHA2	pleckstrin homology domain containing A2 [Source:HGNC Symbol;Acc:HGNC:14336]	0.210052	5.08902	1.53808	0.151507	0.99919	-4.44302
ENSG00000133884	DPF2	double PHD fingers 2 [Source:HGNC Symbol;Acc:HGNC:9964]	-0.22729	5.4121	-1.53749	0.151651	0.99919	-4.4417
ENSG00000198938	MT-CO3	mitochondrially encoded cytochrome c oxidase III [Source:HGNC Symbol;Acc:HGNC:7422]	-0.217148	13.833	-1.53729	0.151699	0.99919	-4.45766
ENSG00000145979	TBC1D7	TBC1 domain family member 7 [Source:HGNC Symbol;Acc:HGNC:21066]	-0.199309	5.14006	-1.53703	0.151762	0.99919	-4.44391
ENSG00000269399	NA	NA	-0.5502	2.24846	-1.53701	0.151766	0.99919	-4.50275
ENSG00000124635	HIST1H2BJ	histone cluster 1, H2bj [Source:HGNC Symbol;Acc:HGNC:4761]	0.377525	1.29954	1.53696	0.15178	0.99919	-4.52078
ENSG00000149926	FAM57B	family with sequence similarity 57 member B [Source:HGNC Symbol;Acc:HGNC:25295]	-0.74129	-0.116507	-1.53684	0.151807	0.99919	-4.55771
ENSG00000167674	NA	Hepatoma-derived growth factor-related protein 2 [Source:UniProtKB/Swiss-Prot;Acc:Q7Z4V5]	-0.281187	5.75137	-1.53657	0.151874	0.99919	-4.44023
ENSG00000048828	FAM120A	family with sequence similarity 120A [Source:HGNC Symbol;Acc:HGNC:13247]	-0.263246	8.8998	-1.53635	0.151927	0.99919	-4.4427
ENSG00000174669	SLC29A2	solute carrier family 29 member 2 [Source:HGNC Symbol;Acc:HGNC:11004]	-0.335064	2.70757	-1.53596	0.152023	0.99919	-4.48778
ENSG00000135373	EHF	ETS homologous factor [Source:HGNC Symbol;Acc:HGNC:3246]	0.272421	3.7919	1.5351	0.152233	0.99919	-4.4609
ENSG00000176974	SHMT1	serine hydroxymethyltransferase 1 [Source:HGNC Symbol;Acc:HGNC:10850]	0.261899	5.27569	1.53456	0.152362	0.99919	-4.44281
ENSG00000224631	RPS27AP16	ribosomal protein S27a pseudogene 16 [Source:HGNC Symbol;Acc:HGNC:36855]	0.236304	5.78164	1.53414	0.152466	0.99919	-4.44036
ENSG00000111801	BTN3A3	butyrophilin subfamily 3 member A3 [Source:HGNC Symbol;Acc:HGNC:1140]	0.341545	1.33754	1.53298	0.152748	0.99919	-4.5209
ENSG00000189171	S100A13	S100 calcium binding protein A13 [Source:HGNC Symbol;Acc:HGNC:10490]	0.342938	7.96612	1.53285	0.15278	0.99919	-4.44165
ENSG00000009950	MLXIPL	MLX interacting protein like [Source:HGNC Symbol;Acc:HGNC:12744]	-0.338762	4.32181	-1.53283	0.152784	0.99919	-4.45556
ENSG00000152904	GGPS1	geranylgeranyl diphosphate synthase 1 [Source:HGNC Symbol;Acc:HGNC:4249]	0.195032	4.50799	1.5324	0.152891	0.99919	-4.45119
ENSG00000254333	NA	NA	0.471363	-0.109421	1.53225	0.152927	0.99919	-4.55212
ENSG00000231312	NA	NA	0.401062	0.928675	1.53157	0.153093	0.99919	-4.53127
ENSG00000213047	DENND1B	DENN domain containing 1B [Source:HGNC Symbol;Acc:HGNC:28404]	0.26944	1.99593	1.53107	0.153215	0.99919	-4.50368
ENSG00000179588	ZFPM1	zinc finger protein, FOG family member 1 [Source:HGNC Symbol;Acc:HGNC:19762]	-0.304828	2.21442	-1.53034	0.153394	0.99919	-4.50262
ENSG00000181016	LSMEM1	leucine rich single-pass membrane protein 1 [Source:HGNC Symbol;Acc:HGNC:22036]	0.308723	1.60267	1.53	0.153478	0.99919	-4.51409
ENSG00000043093	DCUN1D1	defective in cullin neddylation 1 domain containing 1 [Source:HGNC Symbol;Acc:HGNC:18184]	0.342643	4.20756	1.52986	0.153512	0.99919	-4.45562
ENSG00000221886	ZBED8	zinc finger BED-type containing 8 [Source:HGNC Symbol;Acc:HGNC:30804]	0.30064	2.57479	1.52976	0.153536	0.99919	-4.48875
ENSG00000181218	HIST3H2A	histone cluster 3, H2a [Source:HGNC Symbol;Acc:HGNC:20507]	0.308393	4.48921	1.52963	0.153568	0.99919	-4.45207
ENSG00000109854	HTATIP2	HIV-1 Tat interactive protein 2 [Source:HGNC Symbol;Acc:HGNC:16637]	0.309199	5.63596	1.52943	0.153616	0.99919	-4.44268
ENSG00000149150	SLC43A1	solute carrier family 43 member 1 [Source:HGNC Symbol;Acc:HGNC:9225]	-0.37309	2.52583	-1.52893	0.153741	0.99919	-4.49469
ENSG00000197863	ZNF790	zinc finger protein 790 [Source:HGNC Symbol;Acc:HGNC:33114]	0.277234	1.99193	1.52833	0.153888	0.99919	-4.50441
ENSG00000101346	POFUT1	protein O-fucosyltransferase 1 [Source:HGNC Symbol;Acc:HGNC:14988]	0.249816	6.03466	1.52828	0.153901	0.99919	-4.44181
ENSG00000277283	NA	NA	0.421152	1.24281	1.52822	0.153915	0.99919	-4.52329
ENSG00000163702	IL17RC	interleukin 17 receptor C [Source:HGNC Symbol;Acc:HGNC:18358]	-0.853103	-0.146721	-1.52746	0.1541	0.99919	-4.55818
ENSG00000196743	GM2A	GM2 ganglioside activator [Source:HGNC Symbol;Acc:HGNC:4367]	0.250868	5.40942	1.52746	0.154102	0.99919	-4.44465
ENSG00000101546	RBFA	ribosome binding factor A (putative) [Source:HGNC Symbol;Acc:HGNC:26120]	0.266133	4.43381	1.52647	0.154345	0.99919	-4.45395
ENSG00000228265	RALY-AS1	RALY antisense RNA 1 [Source:HGNC Symbol;Acc:HGNC:50743]	0.426934	0.594368	1.52632	0.154382	0.99919	-4.53901
ENSG00000168505	GBX2	gastrulation brain homeobox 2 [Source:HGNC Symbol;Acc:HGNC:4186]	-0.608115	-0.65811	-1.52622	0.154406	0.99919	-4.56518
ENSG00000267213	NA	NA	0.430929	0.556064	1.52568	0.154539	0.99919	-4.54015
ENSG00000054690	PLEKHH1	pleckstrin homology, MyTH4 and FERM domain containing H1 [Source:HGNC Symbol;Acc:HGNC:17733]	-0.357878	1.61972	-1.52528	0.154639	0.99919	-4.51982
ENSG00000164818	DNAAF5	dynein axonemal assembly factor 5 [Source:HGNC Symbol;Acc:HGNC:26013]	-0.290897	5.97299	-1.52513	0.154675	0.99919	-4.44366
ENSG00000136478	TEX2	testis expressed 2 [Source:HGNC Symbol;Acc:HGNC:30884]	0.314739	5.43	1.52505	0.154695	0.99919	-4.44536
ENSG00000148399	DPH7	diphthamide biosynthesis 7 [Source:HGNC Symbol;Acc:HGNC:25199]	-0.22466	6.39415	-1.5241	0.154929	0.99919	-4.44295
ENSG00000151320	AKAP6	A-kinase anchoring protein 6 [Source:HGNC Symbol;Acc:HGNC:376]	0.471201	0.936672	1.524	0.154954	0.99919	-4.53138
ENSG00000196544	BORCS6	BLOC-1 related complex subunit 6 [Source:HGNC Symbol;Acc:HGNC:25939]	-0.26896	4.87953	-1.52379	0.155007	0.99919	-4.45146
ENSG00000196417	ZNF765	zinc finger protein 765 [Source:HGNC Symbol;Acc:HGNC:25092]	0.252376	2.87127	1.52378	0.15501	0.99919	-4.4837
ENSG00000177989	ODF3B	outer dense fiber of sperm tails 3B [Source:HGNC Symbol;Acc:HGNC:34388]	1.08767	-1.01003	1.52359	0.155056	0.99919	-4.56459
ENSG00000167291	TBC1D16	TBC1 domain family member 16 [Source:HGNC Symbol;Acc:HGNC:28356]	-0.225333	6.16172	-1.52318	0.155157	0.99919	-4.44375
ENSG00000234327	NA	NA	0.283065	4.35503	1.52285	0.15524	0.99919	-4.45633
ENSG00000168101	NUDT16L1	nudix hydrolase 16 like 1 [Source:HGNC Symbol;Acc:HGNC:28154]	0.301654	6.78246	1.52272	0.155271	0.99919	-4.44329
ENSG00000136720	HS6ST1	heparan sulfate 6-O-sulfotransferase 1 [Source:HGNC Symbol;Acc:HGNC:5201]	0.322728	2.71871	1.52241	0.155348	0.99919	-4.48686
ENSG00000186806	VSIG10L	V-set and immunoglobulin domain containing 10 like [Source:HGNC Symbol;Acc:HGNC:27111]	0.424757	0.609042	1.52212	0.155419	0.99919	-4.53978
ENSG00000174804	FZD4	frizzled class receptor 4 [Source:HGNC Symbol;Acc:HGNC:4042]	-0.264554	2.82721	-1.52205	0.155437	0.99919	-4.48811
ENSG00000128739	SNRPN	small nuclear ribonucleoprotein polypeptide N [Source:HGNC Symbol;Acc:HGNC:11164]	-0.39752	5.81599	-1.52202	0.155445	0.99919	-4.44566
ENSG00000137814	HAUS2	HAUS augmin like complex subunit 2 [Source:HGNC Symbol;Acc:HGNC:25530]	-0.280387	4.1655	-1.52189	0.155476	0.99919	-4.46149
ENSG00000260401	NA	NA	0.458105	0.500517	1.52152	0.15557	0.99919	-4.54131
ENSG00000125449	ARMC7	armadillo repeat containing 7 [Source:HGNC Symbol;Acc:HGNC:26168]	-0.395282	3.80233	-1.52136	0.155608	0.99919	-4.46824
ENSG00000185158	LRRC37B	leucine rich repeat containing 37B [Source:HGNC Symbol;Acc:HGNC:29070]	0.262028	2.36273	1.52102	0.155693	0.99919	-4.49661
ENSG00000213380	COG8	component of oligomeric golgi complex 8 [Source:HGNC Symbol;Acc:HGNC:18623]	0.227429	5.34769	1.52088	0.155728	0.99919	-4.44752
ENSG00000176700	SCAND2P	SCAN domain containing 2 pseudogene [Source:HGNC Symbol;Acc:HGNC:10567]	0.407472	1.21848	1.52088	0.155729	0.99919	-4.52517
ENSG00000141542	RAB40B	RAB40B, member RAS oncogene family [Source:HGNC Symbol;Acc:HGNC:18284]	-0.215556	5.17641	-1.52071	0.15577	0.99919	-4.44963
ENSG00000129696	TTI2	TELO2 interacting protein 2 [Source:HGNC Symbol;Acc:HGNC:26262]	0.302817	3.62187	1.52027	0.155878	0.99919	-4.46854
ENSG00000104936	DMPK	dystrophia myotonica protein kinase [Source:HGNC Symbol;Acc:HGNC:2933]	-0.260778	2.4287	-1.51997	0.155953	0.99919	-4.49874
ENSG00000166033	HTRA1	HtrA serine peptidase 1 [Source:HGNC Symbol;Acc:HGNC:9476]	-0.214286	6.63042	-1.51967	0.156028	0.99919	-4.44446
ENSG00000185033	SEMA4B	semaphorin 4B [Source:HGNC Symbol;Acc:HGNC:10730]	-0.407701	3.95352	-1.51931	0.156117	0.99919	-4.46659
ENSG00000131778	CHD1L	chromodomain helicase DNA binding protein 1 like [Source:HGNC Symbol;Acc:HGNC:1916]	-0.215046	5.88501	-1.51859	0.156298	0.99919	-4.44639
ENSG00000100105	PATZ1	POZ/BTB and AT hook containing zinc finger 1 [Source:HGNC Symbol;Acc:HGNC:13071]	-0.201329	5.57506	-1.5184	0.156345	0.99919	-4.44783
ENSG00000130695	CEP85	centrosomal protein 85 [Source:HGNC Symbol;Acc:HGNC:25309]	-0.247442	4.15425	-1.51835	0.156357	0.99919	-4.46263
ENSG00000163251	FZD5	frizzled class receptor 5 [Source:HGNC Symbol;Acc:HGNC:4043]	0.275883	2.66609	1.51806	0.156428	0.99919	-4.4896
ENSG00000265098	MIR4510	microRNA 4510 [Source:HGNC Symbol;Acc:HGNC:41708]	-0.645135	-0.0611307	-1.51766	0.156528	0.99919	-4.55841
ENSG00000137411	VARS2	valyl-tRNA synthetase 2, mitochondrial [Source:HGNC Symbol;Acc:HGNC:21642]	-0.348319	5.20291	-1.51759	0.156546	0.99919	-4.45096
ENSG00000196757	ZNF700	zinc finger protein 700 [Source:HGNC Symbol;Acc:HGNC:25292]	-0.293949	2.40612	-1.51731	0.156616	0.99919	-4.50035
ENSG00000134686	PHC2	polyhomeotic homolog 2 [Source:HGNC Symbol;Acc:HGNC:3183]	-0.248052	6.36173	-1.51671	0.156765	0.99919	-4.44586
ENSG00000135624	CCT7	chaperonin containing TCP1 subunit 7 [Source:HGNC Symbol;Acc:HGNC:1622]	-0.213791	9.699	-1.51583	0.156986	0.99919	-4.45274
ENSG00000119912	IDE	insulin degrading enzyme [Source:HGNC Symbol;Acc:HGNC:5381]	0.193951	4.63942	1.51525	0.15713	0.99919	-4.45571
ENSG00000105053	VRK3	vaccinia related kinase 3 [Source:HGNC Symbol;Acc:HGNC:18996]	-0.303979	5.12667	-1.5151	0.157168	0.99919	-4.45236
ENSG00000236423	LINC01134	long intergenic non-protein coding RNA 1134 [Source:HGNC Symbol;Acc:HGNC:49449]	-0.330574	1.15066	-1.51506	0.15718	0.99919	-4.53202
ENSG00000213553	RPLP0P6	ribosomal protein lateral stalk subunit P0 pseudogene 6 [Source:HGNC Symbol;Acc:HGNC:36404]	0.759309	0.548627	1.51491	0.157217	0.99919	-4.54061
ENSG00000166917	MIR202HG	MIR202 host gene [Source:HGNC Symbol;Acc:HGNC:49402]	-0.426067	3.42045	-1.51435	0.157356	0.99919	-4.47746
ENSG00000168763	CNNM3	cyclin and CBS domain divalent metal cation transport mediator 3 [Source:HGNC Symbol;Acc:HGNC:104]	-0.209818	5.19501	-1.51419	0.157396	0.99919	-4.45187
ENSG00000136146	MED4	mediator complex subunit 4 [Source:HGNC Symbol;Acc:HGNC:17903]	-0.23876	6.16581	-1.51354	0.157558	0.99919	-4.44746
ENSG00000120075	HOXB5	homeobox B5 [Source:HGNC Symbol;Acc:HGNC:5116]	-0.322365	7.45783	-1.51293	0.157714	0.99919	-4.44776
ENSG00000105793	GTPBP10	GTP binding protein 10 [Source:HGNC Symbol;Acc:HGNC:25106]	0.232682	3.46305	1.51253	0.157813	0.99919	-4.47418
ENSG00000143368	SF3B4	splicing factor 3b subunit 4 [Source:HGNC Symbol;Acc:HGNC:10771]	-0.229827	5.21605	-1.51209	0.157923	0.99919	-4.45253
ENSG00000116096	SPR	sepiapterin reductase (7,8-dihydrobiopterin:NADP+ oxidoreductase) [Source:HGNC Symbol;Acc:HGNC:11257]	0.313159	5.13716	1.51203	0.157939	0.99919	-4.4521
ENSG00000138821	SLC39A8	solute carrier family 39 member 8 [Source:HGNC Symbol;Acc:HGNC:20862]	-0.303477	2.33002	-1.51159	0.158049	0.99919	-4.50357
ENSG00000135940	COX5B	cytochrome c oxidase subunit 5B [Source:HGNC Symbol;Acc:HGNC:2269]	0.281891	7.66838	1.5112	0.158147	0.99919	-4.44908
ENSG00000136938	ANP32B	acidic nuclear phosphoprotein 32 family member B [Source:HGNC Symbol;Acc:HGNC:16677]	-0.221523	8.46087	-1.51112	0.158168	0.99919	-4.45084
ENSG00000170445	HARS	histidyl-tRNA synthetase [Source:HGNC Symbol;Acc:HGNC:4816]	0.266559	5.53021	1.51098	0.158202	0.99919	-4.4502
ENSG00000162639	HENMT1	HEN1 methyltransferase homolog 1 [Source:HGNC Symbol;Acc:HGNC:26400]	-0.229487	5.79702	-1.51081	0.158246	0.99919	-4.4497
ENSG00000235828	RPL36AP26	ribosomal protein L36a pseudogene 26 [Source:HGNC Symbol;Acc:HGNC:36758]	0.443319	-0.415367	1.51075	0.15826	0.99919	-4.55949
ENSG00000136936	XPA	XPA, DNA damage recognition and repair factor [Source:HGNC Symbol;Acc:HGNC:12814]	0.231433	5.28148	1.51055	0.15831	0.99919	-4.45179
ENSG00000248132	NA	NA	0.381842	1.38548	1.51015	0.158412	0.99919	-4.52297
ENSG00000113719	ERGIC1	endoplasmic reticulum-golgi intermediate compartment 1 [Source:HGNC Symbol;Acc:HGNC:29205]	0.280347	7.82362	1.51004	0.15844	0.99919	-4.4499
ENSG00000132017	DCAF15	DDB1 and CUL4 associated factor 15 [Source:HGNC Symbol;Acc:HGNC:25095]	-0.640631	2.01939	-1.50969	0.158527	0.99919	-4.51433
ENSG00000215883	CYB5RL	cytochrome b5 reductase like [Source:HGNC Symbol;Acc:HGNC:32220]	0.280386	2.68975	1.50955	0.158564	0.99919	-4.49095
ENSG00000069943	PIGB	phosphatidylinositol glycan anchor biosynthesis class B [Source:HGNC Symbol;Acc:HGNC:8959]	0.382278	3.20021	1.50922	0.158647	0.99919	-4.4795
ENSG00000116815	CD58	CD58 molecule [Source:HGNC Symbol;Acc:HGNC:1688]	-0.494091	4.81691	-1.5092	0.158652	0.99919	-4.45821
ENSG00000171448	ZBTB26	zinc finger and BTB domain containing 26 [Source:HGNC Symbol;Acc:HGNC:23383]	0.304547	1.44632	1.50917	0.158659	0.99919	-4.52178
ENSG00000205913	SRRM2-AS1	SRRM2 antisense RNA 1 [Source:HGNC Symbol;Acc:HGNC:44162]	0.341552	1.31948	1.50896	0.15871	0.99919	-4.52483
ENSG00000182165	TP53TG1	TP53 target 1 (non-protein coding) [Source:HGNC Symbol;Acc:HGNC:17026]	0.211259	4.09737	1.50877	0.158759	0.99919	-4.46481
ENSG00000230383	NA	NA	0.535108	-0.76457	1.50864	0.158792	0.99919	-4.5642
ENSG00000140044	JDP2	Jun dimerization protein 2 [Source:HGNC Symbol;Acc:HGNC:17546]	-0.337302	2.52472	-1.50839	0.158855	0.99919	-4.499
ENSG00000182054	IDH2	isocitrate dehydrogenase (NADP(+)) 2, mitochondrial [Source:HGNC Symbol;Acc:HGNC:5383]	0.308771	6.60792	1.50812	0.158922	0.99919	-4.44885
ENSG00000162664	ZNF326	zinc finger protein 326 [Source:HGNC Symbol;Acc:HGNC:14104]	-0.224647	5.92559	-1.50751	0.159078	0.99919	-4.45046
ENSG00000262049	NA	NA	0.377993	2.64475	1.50699	0.159209	0.99919	-4.49223
ENSG00000205485	NA	NA	-0.334735	1.79972	-1.50602	0.159456	0.99919	-4.51805
ENSG00000172380	GNG12	G protein subunit gamma 12 [Source:HGNC Symbol;Acc:HGNC:19663]	0.348471	3.43201	1.50593	0.159479	0.99919	-4.47608
ENSG00000139684	ESD	esterase D [Source:HGNC Symbol;Acc:HGNC:3465]	0.198378	5.03207	1.50539	0.159614	0.99919	-4.45551
ENSG00000205542	TMSB4X	thymosin beta 4, X-linked [Source:HGNC Symbol;Acc:HGNC:11881]	0.249789	13.2696	1.50464	0.159806	0.99919	-4.46738
ENSG00000133943	C14orf159	chromosome 14 open reading frame 159 [Source:HGNC Symbol;Acc:HGNC:20498]	0.242781	4.03539	1.5044	0.159865	0.99919	-4.46705
ENSG00000144354	CDCA7	cell division cycle associated 7 [Source:HGNC Symbol;Acc:HGNC:14628]	-0.220709	7.09044	-1.50418	0.159922	0.99919	-4.45061
ENSG00000139182	CLSTN3	calsyntenin 3 [Source:HGNC Symbol;Acc:HGNC:18371]	-0.500126	3.83481	-1.5041	0.159941	0.99919	-4.47337
ENSG00000170234	PWWP2A	PWWP domain containing 2A [Source:HGNC Symbol;Acc:HGNC:29406]	-0.334703	4.63886	-1.50374	0.160034	0.99919	-4.46139
ENSG00000161920	MED11	mediator complex subunit 11 [Source:HGNC Symbol;Acc:HGNC:32687]	0.270436	2.60878	1.50369	0.160045	0.99919	-4.49469
ENSG00000130177	CDC16	cell division cycle 16 [Source:HGNC Symbol;Acc:HGNC:1720]	0.250665	4.4781	1.50279	0.160275	0.99919	-4.4617
ENSG00000204116	CHIC1	cysteine rich hydrophobic domain 1 [Source:HGNC Symbol;Acc:HGNC:1934]	0.471168	0.0745625	1.50252	0.160345	0.99919	-4.55188
ENSG00000008394	MGST1	microsomal glutathione S-transferase 1 [Source:HGNC Symbol;Acc:HGNC:7061]	0.402168	6.1028	1.50226	0.160409	0.99919	-4.4516
ENSG00000166024	R3HCC1L	R3H domain and coiled-coil containing 1 like [Source:HGNC Symbol;Acc:HGNC:23512]	0.300924	3.45426	1.502	0.160476	0.99919	-4.47704
ENSG00000143319	ISG20L2	interferon stimulated exonuclease gene 20 like 2 [Source:HGNC Symbol;Acc:HGNC:25745]	-0.229189	5.43768	-1.5017	0.160554	0.99919	-4.4549
ENSG00000235034	C19orf81	chromosome 19 open reading frame 81 [Source:HGNC Symbol;Acc:HGNC:40041]	-1.00368	-0.407129	-1.50167	0.16056	0.99919	-4.56452
ENSG00000234880	LINC00163	long intergenic non-protein coding RNA 163 [Source:HGNC Symbol;Acc:HGNC:33165]	-0.549246	-0.0372254	-1.5016	0.160578	0.99919	-4.5582
ENSG00000100196	KDELR3	KDEL endoplasmic reticulum protein retention receptor 3 [Source:HGNC Symbol;Acc:HGNC:6306]	0.315557	3.57741	1.50138	0.160635	0.99919	-4.47494
ENSG00000234283	LINC01731	NA	-0.451249	0.457188	-1.50123	0.160672	0.99919	-4.55042
ENSG00000196712	NF1	neurofibromin 1 [Source:HGNC Symbol;Acc:HGNC:7765]	-0.173408	6.70375	-1.50111	0.160703	0.99919	-4.45158
ENSG00000180611	MB21D2	Mab-21 domain containing 2 [Source:HGNC Symbol;Acc:HGNC:30438]	0.2829	4.9953	1.49992	0.161006	0.99919	-4.45766
ENSG00000227124	ZNF717	zinc finger protein 717 [Source:HGNC Symbol;Acc:HGNC:29448]	0.440893	1.20271	1.49955	0.161101	0.99919	-4.52872
ENSG00000131653	TRAF7	TNF receptor associated factor 7 [Source:HGNC Symbol;Acc:HGNC:20456]	-0.206562	5.65605	-1.49946	0.161126	0.99919	-4.45458
ENSG00000111321	LTBR	lymphotoxin beta receptor [Source:HGNC Symbol;Acc:HGNC:6718]	-0.395439	6.50019	-1.49919	0.161195	0.99919	-4.45253
ENSG00000173581	CCDC106	coiled-coil domain containing 106 [Source:HGNC Symbol;Acc:HGNC:30181]	-0.303058	2.95157	-1.49848	0.161375	0.99919	-4.4918
ENSG00000112773	FAM46A	family with sequence similarity 46 member A [Source:HGNC Symbol;Acc:HGNC:18345]	-0.309816	5.53611	-1.49847	0.161377	0.99919	-4.45572
ENSG00000146063	TRIM41	tripartite motif containing 41 [Source:HGNC Symbol;Acc:HGNC:19013]	-0.198519	5.57557	-1.49816	0.161458	0.99919	-4.45542
ENSG00000088340	FER1L4	fer-1 like family member 4, pseudogene [Source:HGNC Symbol;Acc:HGNC:15801]	0.848145	0.849864	1.49806	0.161483	0.99919	-4.5354
ENSG00000141314	RHBDL3	rhomboid like 3 [Source:HGNC Symbol;Acc:HGNC:16502]	-0.35332	0.719277	-1.49686	0.161791	0.99919	-4.54423
ENSG00000153902	LGI4	leucine rich repeat LGI family member 4 [Source:HGNC Symbol;Acc:HGNC:18712]	0.473521	-0.0662929	1.49676	0.161816	0.99919	-4.55532
ENSG00000132823	OSER1	oxidative stress responsive serine rich 1 [Source:HGNC Symbol;Acc:HGNC:16105]	0.189195	4.7464	1.49669	0.161833	0.99919	-4.46119
ENSG00000188647	PTAR1	protein prenyltransferase alpha subunit repeat containing 1 [Source:HGNC Symbol;Acc:HGNC:30449]	-0.283522	4.10431	-1.49656	0.161869	0.99919	-4.47058
ENSG00000141934	PLPP2	phospholipid phosphatase 2 [Source:HGNC Symbol;Acc:HGNC:9230]	-0.278401	6.78876	-1.49638	0.161913	0.99919	-4.45343
ENSG00000136875	PRPF4	pre-mRNA processing factor 4 [Source:HGNC Symbol;Acc:HGNC:17349]	-0.227247	5.00405	-1.49604	0.162	0.99919	-4.46008
ENSG00000185483	ROR1	receptor tyrosine kinase like orphan receptor 1 [Source:HGNC Symbol;Acc:HGNC:10256]	0.598092	-0.310614	1.49585	0.162051	0.99919	-4.55866
ENSG00000139433	GLTP	glycolipid transfer protein [Source:HGNC Symbol;Acc:HGNC:24867]	0.278264	5.02405	1.49561	0.162111	0.99919	-4.45905
ENSG00000038210	PI4K2B	phosphatidylinositol 4-kinase type 2 beta [Source:HGNC Symbol;Acc:HGNC:18215]	0.268174	3.83328	1.4956	0.162114	0.99919	-4.47285
ENSG00000131446	MGAT1	mannosyl (alpha-1,3-)-glycoprotein beta-1,2-N-acetylglucosaminyltransferase [Source:HGNC Symbol;Acc:HGNC:7044]	-0.254432	7.02121	-1.49547	0.162149	0.99919	-4.45389
ENSG00000177337	DLGAP1-AS1	DLGAP1 antisense RNA 1 [Source:HGNC Symbol;Acc:HGNC:31676]	-0.318252	2.53641	-1.49489	0.162296	0.99919	-4.50171
ENSG00000247675	LRP4-AS1	LRP4 antisense RNA 1 [Source:HGNC Symbol;Acc:HGNC:44128]	0.247615	3.55871	1.49424	0.162464	0.99919	-4.47801
ENSG00000101911	PRPS2	phosphoribosyl pyrophosphate synthetase 2 [Source:HGNC Symbol;Acc:HGNC:9465]	0.278139	6.60323	1.49384	0.162566	0.99919	-4.45434
ENSG00000159231	CBR3	carbonyl reductase 3 [Source:HGNC Symbol;Acc:HGNC:1549]	0.263407	5.3675	1.49359	0.162631	0.99919	-4.45755
[truncated: 12,070 more rows]

## Sheet: BI-3406_50mgkg_10h
ensg	symbol	name	logFC	AveExpr	t	P.Value	adj.P.Val	B
ENSG00000160888	IER2	immediate early response 2 [Source:HGNC Symbol;Acc:HGNC:28871]	-0.869625	9.09831	-8.30417	1.25074e-06	0.0168575	5.38733
ENSG00000250072	NA	NA	-1.15262	7.42152	-7.65147	3.11833e-06	0.0210144	4.6606
ENSG00000171223	JUNB	JunB proto-oncogene, AP-1 transcription factor subunit [Source:HGNC Symbol;Acc:HGNC:6205]	-0.868325	4.80929	-7.31515	5.09542e-06	0.022892	4.14165
ENSG00000117152	RGS4	regulator of G-protein signaling 4 [Source:HGNC Symbol;Acc:HGNC:10000]	-0.81496	6.589	-6.94129	8.94608e-06	0.0301438	3.75453
ENSG00000059804	SLC2A3	solute carrier family 2 member 3 [Source:HGNC Symbol;Acc:HGNC:11007]	-1.18857	6.49585	-6.26699	2.58804e-05	0.0697632	2.81138
ENSG00000144136	SLC20A1	solute carrier family 20 member 1 [Source:HGNC Symbol;Acc:HGNC:10946]	-1.03927	8.73655	-6.02603	3.84057e-05	0.0725513	2.4463
ENSG00000146411	SLC2A12	solute carrier family 2 member 12 [Source:HGNC Symbol;Acc:HGNC:18067]	0.683241	4.09006	5.97172	4.20258e-05	0.0725513	2.2805
ENSG00000244405	ETV5	ETS variant 5 [Source:HGNC Symbol;Acc:HGNC:3494]	-0.854903	6.46521	-5.93859	4.44082e-05	0.0725513	2.3275
ENSG00000006468	ETV1	ETS variant 1 [Source:HGNC Symbol;Acc:HGNC:3490]	-0.898087	3.81417	-5.82703	5.3531e-05	0.0725513	2.00562
ENSG00000281881	SPRY4-IT1	SPRY4 intronic transcript 1 [Source:HGNC Symbol;Acc:HGNC:42394]	-1.38541	4.77089	-5.82373	5.38294e-05	0.0725513	2.09739
ENSG00000175832	ETV4	ETS variant 4 [Source:HGNC Symbol;Acc:HGNC:3493]	-1.12216	2.35772	-5.57276	8.24821e-05	0.0911395	1.21592
ENSG00000163814	CDCP1	CUB domain containing protein 1 [Source:HGNC Symbol;Acc:HGNC:24357]	-0.649017	7.43929	-5.5372	8.76866e-05	0.0911395	1.7088
ENSG00000103196	CRISPLD2	cysteine rich secretory protein LCCL domain containing 2 [Source:HGNC Symbol;Acc:HGNC:25248]	-0.767526	5.03931	-5.50809	9.22014e-05	0.0911395	1.64443
ENSG00000006327	TNFRSF12A	TNF receptor superfamily member 12A [Source:HGNC Symbol;Acc:HGNC:18152]	-1.46567	5.10781	-5.4928	9.46693e-05	0.0911395	1.61448
ENSG00000175592	FOSL1	FOS like 1, AP-1 transcription factor subunit [Source:HGNC Symbol;Acc:HGNC:13718]	-0.792237	4.92913	-5.3525	0.000120823	0.108563	1.39747
ENSG00000164056	SPRY1	sprouty RTK signaling antagonist 1 [Source:HGNC Symbol;Acc:HGNC:11269]	-0.731317	4.12979	-5.14846	0.000173101	0.139669	1.03817
ENSG00000100100	PIK3IP1	phosphoinositide-3-kinase interacting protein 1 [Source:HGNC Symbol;Acc:HGNC:24942]	0.629388	3.38685	5.13858	0.000176166	0.139669	0.964613
ENSG00000108342	CSF3	colony stimulating factor 3 [Source:HGNC Symbol;Acc:HGNC:2438]	-1.10322	3.85077	-5.04136	0.000209527	0.154499	0.840077
ENSG00000174004	NRROS	negative regulator of reactive oxygen species [Source:HGNC Symbol;Acc:HGNC:24613]	-0.833342	2.70873	-5.01975	0.000217798	0.154499	0.624872
ENSG00000011422	PLAUR	plasminogen activator, urokinase receptor [Source:HGNC Symbol;Acc:HGNC:9053]	-0.781966	5.79486	-4.93005	0.000255934	0.172474	0.725841
ENSG00000120738	EGR1	early growth response 1 [Source:HGNC Symbol;Acc:HGNC:3238]	-1.5571	6.09336	-4.84344	0.000299385	0.177543	0.581292
ENSG00000272405	NA	NA	-1.09405	5.9878	-4.79436	0.000327339	0.177543	0.499092
ENSG00000144481	TRPM8	transient receptor potential cation channel subfamily M member 8 [Source:HGNC Symbol;Acc:HGNC:17961]	-0.851385	1.87094	-4.78091	0.000335463	0.177543	0.0302091
ENSG00000114554	PLXNA1	plexin A1 [Source:HGNC Symbol;Acc:HGNC:9099]	-0.578732	6.73328	-4.77809	0.000337193	0.177543	0.471531
ENSG00000123080	CDKN2C	cyclin dependent kinase inhibitor 2C [Source:HGNC Symbol;Acc:HGNC:1789]	0.564038	4.26582	4.77116	0.000341486	0.177543	0.448825
ENSG00000233695	GAS6-AS1	GAS6 antisense RNA 1 [Source:HGNC Symbol;Acc:HGNC:39826]	1.39378	0.872934	4.7413	0.000360631	0.177543	-0.391786
ENSG00000163739	CXCL1	C-X-C motif chemokine ligand 1 [Source:HGNC Symbol;Acc:HGNC:4602]	-0.90118	5.30026	-4.72878	0.000368988	0.177543	0.388296
ENSG00000108984	MAP2K6	mitogen-activated protein kinase kinase 6 [Source:HGNC Symbol;Acc:HGNC:6846]	0.85314	2.05373	4.72865	0.000369074	0.177543	0.0868664
ENSG00000136114	THSD1	thrombospondin type 1 domain containing 1 [Source:HGNC Symbol;Acc:HGNC:17754]	-0.615742	5.15267	-4.70984	0.00038201	0.177543	0.356331
ENSG00000221676	RNU6ATAC	RNA, U6atac small nuclear (U12-dependent splicing) [Source:HGNC Symbol;Acc:HGNC:34017]	1.3425	2.31077	4.62195	0.000448988	0.198924	-0.00331942
ENSG00000260877	NA	NA	-1.0877	3.16815	-4.60363	0.000464425	0.198924	0.0841136
ENSG00000137331	IER3	immediate early response 3 [Source:HGNC Symbol;Acc:HGNC:5392]	-0.712536	5.80872	-4.59452	0.000472293	0.198924	0.160277
ENSG00000018408	WWTR1	WW domain containing transcription regulator 1 [Source:HGNC Symbol;Acc:HGNC:24042]	-0.517049	6.70286	-4.50455	0.00055793	0.227872	0.00434436
ENSG00000143375	CGN	cingulin [Source:HGNC Symbol;Acc:HGNC:17429]	1.62852	0.905651	4.46903	0.000596022	0.23627	-0.704923
ENSG00000134531	EMP1	epithelial membrane protein 1 [Source:HGNC Symbol;Acc:HGNC:3333]	-0.987109	5.85311	-4.44176	0.000627084	0.237596	-0.102019
ENSG00000101311	FERMT1	fermitin family member 1 [Source:HGNC Symbol;Acc:HGNC:15889]	-0.786057	5.72184	-4.40367	0.000673288	0.237596	-0.167666
ENSG00000168389	MFSD2A	major facilitator superfamily domain containing 2A [Source:HGNC Symbol;Acc:HGNC:25897]	-0.811682	2.09587	-4.38729	0.000694221	0.237596	-0.432233
ENSG00000167771	RCOR2	REST corepressor 2 [Source:HGNC Symbol;Acc:HGNC:27455]	0.867925	2.68361	4.38574	0.000696239	0.237596	-0.283486
ENSG00000276851	NA	NA	-0.825606	2.0781	-4.38231	0.00070072	0.237596	-0.444218
ENSG00000182022	CHST15	carbohydrate sulfotransferase 15 [Source:HGNC Symbol;Acc:HGNC:18137]	-0.475959	5.85109	-4.37895	0.000705137	0.237596	-0.211713
ENSG00000139318	DUSP6	dual specificity phosphatase 6 [Source:HGNC Symbol;Acc:HGNC:3072]	-1.45458	3.81821	-4.34538	0.000750899	0.246844	-0.280027
ENSG00000104081	BMF	Bcl2 modifying factor [Source:HGNC Symbol;Acc:HGNC:24132]	1.10045	3.81153	4.32629	0.000778291	0.249757	-0.299507
ENSG00000239713	APOBEC3G	apolipoprotein B mRNA editing enzyme catalytic subunit 3G [Source:HGNC Symbol;Acc:HGNC:17357]	-1.22541	1.67178	-4.28265	0.000844805	0.259494	-0.732864
ENSG00000143127	ITGA10	integrin subunit alpha 10 [Source:HGNC Symbol;Acc:HGNC:6135]	-0.735915	2.85189	-4.28119	0.000847137	0.259494	-0.444956
ENSG00000104783	KCNN4	potassium calcium-activated channel subfamily N member 4 [Source:HGNC Symbol;Acc:HGNC:6293]	-0.717148	8.74222	-4.18853	0.00100896	0.302194	-0.541298
ENSG00000172354	GNB2	G protein subunit beta 2 [Source:HGNC Symbol;Acc:HGNC:4398]	0.701871	7.25331	4.13068	0.00112579	0.329855	-0.647583
ENSG00000166689	PLEKHA7	pleckstrin homology domain containing A7 [Source:HGNC Symbol;Acc:HGNC:27049]	0.734663	3.04202	4.11689	0.00115565	0.331178	-0.674995
ENSG00000070731	ST6GALNAC2	ST6 N-acetylgalactosaminide alpha-2,6-sialyltransferase 2 [Source:HGNC Symbol;Acc:HGNC:10867]	0.636017	2.74087	4.09127	0.00121328	0.331178	-0.739222
ENSG00000169242	EFNA1	ephrin A1 [Source:HGNC Symbol;Acc:HGNC:3221]	0.542284	4.94802	4.08185	0.0012352	0.331178	-0.72281
ENSG00000171867	PRNP	prion protein [Source:HGNC Symbol;Acc:HGNC:9449]	-0.482088	9.06085	-4.07997	0.00123962	0.331178	-0.730882
ENSG00000196639	HRH1	histamine receptor H1 [Source:HGNC Symbol;Acc:HGNC:5182]	-0.59542	3.02805	-4.07022	0.00126281	0.331178	-0.760794
ENSG00000110888	CAPRIN2	caprin family member 2 [Source:HGNC Symbol;Acc:HGNC:21259]	-0.609311	5.84743	-4.06405	0.00127773	0.331178	-0.763948
ENSG00000090924	PLEKHG2	pleckstrin homology and RhoGEF domain containing G2 [Source:HGNC Symbol;Acc:HGNC:29515]	-0.462373	4.08549	-4.01531	0.00140208	0.345728	-0.824738
ENSG00000233085	NA	NA	-0.38091	7.14008	-4.0126	0.00140934	0.345728	-0.857702
ENSG00000012061	ERCC1	ERCC excision repair 1, endonuclease non-catalytic subunit [Source:HGNC Symbol;Acc:HGNC:3433]	-0.413833	6.57656	-4.01205	0.00141082	0.345728	-0.859557
ENSG00000143162	CREG1	cellular repressor of E1A stimulated genes 1 [Source:HGNC Symbol;Acc:HGNC:2351]	0.468054	5.48985	3.99146	0.00146736	0.353163	-0.890256
ENSG00000197977	ELOVL2	ELOVL fatty acid elongase 2 [Source:HGNC Symbol;Acc:HGNC:14416]	-0.881128	1.43339	-3.95136	0.00158424	0.374604	-1.22814
ENSG00000115461	IGFBP5	insulin like growth factor binding protein 5 [Source:HGNC Symbol;Acc:HGNC:5474]	-3.06598	-1.90387	-3.89939	0.00175	0.39214	-2.86904
ENSG00000138413	IDH1	isocitrate dehydrogenase (NADP(+)) 1, cytosolic [Source:HGNC Symbol;Acc:HGNC:5382]	0.388347	5.92996	3.89312	0.00177118	0.39214	-1.06965
ENSG00000187678	SPRY4	sprouty RTK signaling antagonist 4 [Source:HGNC Symbol;Acc:HGNC:15533]	-1.10738	2.30683	-3.88855	0.00178678	0.39214	-1.13481
ENSG00000157193	LRP8	LDL receptor related protein 8 [Source:HGNC Symbol;Acc:HGNC:6700]	-0.460363	6.10988	-3.88364	0.00180369	0.39214	-1.08724
ENSG00000115756	HPCAL1	hippocalcin like 1 [Source:HGNC Symbol;Acc:HGNC:5145]	-0.51232	9.15024	-3.86346	0.00187488	0.39214	-1.1139
ENSG00000171357	LURAP1	leucine rich adaptor protein 1 [Source:HGNC Symbol;Acc:HGNC:32327]	-0.886071	1.34205	-3.8629	0.0018769	0.39214	-1.37455
ENSG00000164850	GPER1	G protein-coupled estrogen receptor 1 [Source:HGNC Symbol;Acc:HGNC:4485]	0.60563	3.74963	3.85194	0.00191685	0.39214	-1.1032
ENSG00000104856	RELB	RELB proto-oncogene, NF-kB subunit [Source:HGNC Symbol;Acc:HGNC:9956]	-0.71782	5.3469	-3.85172	0.00191764	0.39214	-1.13382
ENSG00000160539	PLPP7	phospholipid phosphatase 7 (inactive) [Source:HGNC Symbol;Acc:HGNC:28174]	0.872796	1.39003	3.85101	0.00192026	0.39214	-1.32382
ENSG00000254777	NA	NA	1.34486	-0.299778	3.83251	0.00198973	0.400263	-1.93972
ENSG00000267194	NA	NA	1.40559	0.647668	3.79797	0.0021264	0.412161	-1.61493
ENSG00000233895	NA	NA	1.27954	-0.00502976	3.7955	0.00213655	0.412161	-1.8566
ENSG00000179348	GATA2	GATA binding protein 2 [Source:HGNC Symbol;Acc:HGNC:4171]	0.67823	3.39208	3.79451	0.00214062	0.412161	-1.19974
ENSG00000116396	KCNC4	potassium voltage-gated channel subfamily C member 4 [Source:HGNC Symbol;Acc:HGNC:6236]	-0.472651	3.8887	-3.75517	0.00230913	0.429027	-1.27014
ENSG00000170485	NPAS2	neuronal PAS domain protein 2 [Source:HGNC Symbol;Acc:HGNC:7895]	-0.58075	5.37635	-3.75282	0.00231961	0.429027	-1.31143
ENSG00000101187	SLCO4A1	solute carrier organic anion transporter family member 4A1 [Source:HGNC Symbol;Acc:HGNC:10953]	-0.688936	6.48464	-3.7519	0.00232371	0.429027	-1.32435
ENSG00000033867	SLC4A7	solute carrier family 4 member 7 [Source:HGNC Symbol;Acc:HGNC:11033]	-0.654848	6.30262	-3.74454	0.00235694	0.429281	-1.33709
ENSG00000231298	LINC00704	long intergenic non-protein coding RNA 704 [Source:HGNC Symbol;Acc:HGNC:44678]	-1.01031	1.8538	-3.72186	0.00246232	0.442496	-1.45988
ENSG00000173801	JUP	junction plakoglobin [Source:HGNC Symbol;Acc:HGNC:6207]	0.506157	6.58106	3.71279	0.00250579	0.444381	-1.39495
ENSG00000127528	KLF2	Kruppel like factor 2 [Source:HGNC Symbol;Acc:HGNC:6347]	-1.06241	3.15447	-3.6996	0.00257043	0.449925	-1.36555
ENSG00000176428	VPS37D	VPS37D, ESCRT-I subunit [Source:HGNC Symbol;Acc:HGNC:18287]	0.523357	2.5065	3.63291	0.00292403	0.50032	-1.49157
ENSG00000185022	MAFF	MAF bZIP transcription factor F [Source:HGNC Symbol;Acc:HGNC:6780]	-1.01789	2.59483	-3.62218	0.00298538	0.50032	-1.51717
ENSG00000166401	SERPINB8	serpin family B member 8 [Source:HGNC Symbol;Acc:HGNC:8952]	-1.08447	1.8136	-3.6216	0.00298872	0.50032	-1.61356
ENSG00000180447	GAS1	growth arrest specific 1 [Source:HGNC Symbol;Acc:HGNC:4165]	0.507633	3.69411	3.61848	0.00300682	0.50032	-1.50428
ENSG00000116791	CRYZ	crystallin zeta [Source:HGNC Symbol;Acc:HGNC:2419]	0.371115	6.35691	3.60385	0.00309321	0.505904	-1.59123
ENSG00000183691	NOG	noggin [Source:HGNC Symbol;Acc:HGNC:7866]	-0.590063	6.10839	-3.60015	0.00311545	0.505904	-1.59594
ENSG00000232110	NA	NA	-0.442034	7.56618	-3.59353	0.00315566	0.506333	-1.60661
ENSG00000137216	TMEM63B	transmembrane protein 63B [Source:HGNC Symbol;Acc:HGNC:17735]	0.514508	5.19166	3.5704	0.00330026	0.523305	-1.63653
ENSG00000075891	PAX2	paired box 2 [Source:HGNC Symbol;Acc:HGNC:8616]	0.984606	0.772306	3.56383	0.00334253	0.523845	-1.8733
ENSG00000106366	SERPINE1	serpin family E member 1 [Source:HGNC Symbol;Acc:HGNC:8583]	-0.95138	5.52744	-3.54836	0.00344428	0.530902	-1.67849
ENSG00000173334	TRIB1	tribbles pseudokinase 1 [Source:HGNC Symbol;Acc:HGNC:16891]	-0.586277	3.69542	-3.54507	0.00346634	0.530902	-1.62796
ENSG00000213213	CCDC183	coiled-coil domain containing 183 [Source:HGNC Symbol;Acc:HGNC:28236]	0.779389	1.69924	3.53046	0.00356596	0.540022	-1.72876
ENSG00000005884	ITGA3	integrin subunit alpha 3 [Source:HGNC Symbol;Acc:HGNC:6139]	-0.600794	5.37994	-3.52289	0.00361871	0.541922	-1.72342
ENSG00000153094	BCL2L11	BCL2 like 11 [Source:HGNC Symbol;Acc:HGNC:994]	0.445246	5.44638	3.5096	0.00371321	0.549963	-1.75166
ENSG00000245149	RNF139-AS1	RNF139 antisense RNA 1 (head to head) [Source:HGNC Symbol;Acc:HGNC:48940]	1.52211	0.0473358	3.49961	0.00378587	0.552886	-2.17498
ENSG00000213347	MXD3	MAX dimerization protein 3 [Source:HGNC Symbol;Acc:HGNC:14008]	0.485386	3.6358	3.49411	0.00382651	0.552886	-1.71762
ENSG00000073282	TP63	tumor protein p63 [Source:HGNC Symbol;Acc:HGNC:15979]	0.416996	5.29677	3.49015	0.00385601	0.552886	-1.78331
ENSG00000149930	TAOK2	TAO kinase 2 [Source:HGNC Symbol;Acc:HGNC:16835]	0.413021	4.3637	3.47126	0.00400012	0.565144	-1.78549
ENSG00000085871	MGST2	microsomal glutathione S-transferase 2 [Source:HGNC Symbol;Acc:HGNC:7063]	0.479109	4.73052	3.46243	0.00406927	0.565144	-1.81548
ENSG00000085831	TTC39A	tetratricopeptide repeat domain 39A [Source:HGNC Symbol;Acc:HGNC:18657]	0.576141	2.57306	3.45827	0.00410231	0.565144	-1.77142
ENSG00000171227	TMEM37	transmembrane protein 37 [Source:HGNC Symbol;Acc:HGNC:18216]	0.553553	2.68186	3.45567	0.00412306	0.565144	-1.77305
ENSG00000181035	SLC25A42	solute carrier family 25 member 42 [Source:HGNC Symbol;Acc:HGNC:28380]	0.528032	2.74037	3.45217	0.00415115	0.565144	-1.77784
ENSG00000066248	NGEF	neuronal guanine nucleotide exchange factor [Source:HGNC Symbol;Acc:HGNC:7807]	-0.365154	4.85174	-3.41679	0.00444652	0.598215	-1.89853
ENSG00000250644	NA	NA	-0.95885	-0.146152	-3.41261	0.00448284	0.598215	-2.39945
ENSG00000273604	EPOP	chromosome 17 open reading frame 96 [Source:HGNC Symbol;Acc:HGNC:34493]	-0.381854	6.08567	-3.39774	0.00461426	0.607414	-1.96166
ENSG00000183087	GAS6	growth arrest specific 6 [Source:HGNC Symbol;Acc:HGNC:4168]	0.741992	6.16756	3.39092	0.00467587	0.607414	-1.97416
ENSG00000067182	TNFRSF1A	TNF receptor superfamily member 1A [Source:HGNC Symbol;Acc:HGNC:11916]	-0.370155	7.37904	-3.3897	0.00468697	0.607414	-1.97542
ENSG00000166821	PEX11A	peroxisomal biogenesis factor 11 alpha [Source:HGNC Symbol;Acc:HGNC:8852]	0.492082	3.89138	3.37915	0.00478413	0.6141	-1.92726
ENSG00000281406	BLACAT1	bladder cancer associated transcript 1 (non-protein coding) [Source:HGNC Symbol;Acc:HGNC:48597]	-0.430598	3.6872	-3.37174	0.00485358	0.614476	-1.92756
ENSG00000196141	SPATS2L	spermatogenesis associated serine rich 2 like [Source:HGNC Symbol;Acc:HGNC:24574]	-0.372002	6.97662	-3.36913	0.00487824	0.614476	-2.01467
ENSG00000273391	NA	NA	0.564147	2.55472	3.35623	0.00500215	0.623692	-1.93815
ENSG00000133316	WDR74	WD repeat domain 74 [Source:HGNC Symbol;Acc:HGNC:25529]	-0.423693	3.84822	-3.34846	0.00507831	0.623692	-1.97486
ENSG00000165732	DDX21	DEAD-box helicase 21 [Source:HGNC Symbol;Acc:HGNC:2744]	-0.341395	9.01597	-3.34726	0.00509023	0.623692	-2.03967
ENSG00000105612	DNASE2	deoxyribonuclease 2, lysosomal [Source:HGNC Symbol;Acc:HGNC:2960]	0.32462	6.91941	3.32698	0.00529504	0.642332	-2.09066
ENSG00000156453	PCDH1	protocadherin 1 [Source:HGNC Symbol;Acc:HGNC:8655]	-0.699363	4.94877	-3.31923	0.00537551	0.642332	-2.07372
ENSG00000173542	MOB1B	MOB kinase activator 1B [Source:HGNC Symbol;Acc:HGNC:29801]	0.518248	4.18039	3.3114	0.00545802	0.642332	-2.05993
ENSG00000241935	HOGA1	4-hydroxy-2-oxoglutarate aldolase 1 [Source:HGNC Symbol;Acc:HGNC:25155]	0.807804	1.02521	3.30968	0.00547631	0.642332	-2.15729
ENSG00000167772	ANGPTL4	angiopoietin like 4 [Source:HGNC Symbol;Acc:HGNC:16039]	-1.21571	6.02091	-3.30927	0.00548065	0.642332	-2.11592
ENSG00000137806	NDUFAF1	NADH:ubiquinone oxidoreductase complex assembly factor 1 [Source:HGNC Symbol;Acc:HGNC:18828]	0.359652	4.05329	3.29232	0.00566437	0.658141	-2.08699
ENSG00000120915	EPHX2	epoxide hydrolase 2 [Source:HGNC Symbol;Acc:HGNC:3402]	0.321711	5.81074	3.28125	0.0057878	0.664012	-2.16962
ENSG00000123384	LRP1	LDL receptor related protein 1 [Source:HGNC Symbol;Acc:HGNC:6692]	0.460586	4.61313	3.27898	0.00581343	0.664012	-2.13781
ENSG00000253276	CCDC71L	coiled-coil domain containing 71-like [Source:HGNC Symbol;Acc:HGNC:26685]	-0.484963	5.00262	-3.27304	0.00588094	0.666078	-2.1605
ENSG00000103671	TRIP4	thyroid hormone receptor interactor 4 [Source:HGNC Symbol;Acc:HGNC:12310]	0.401453	3.86263	3.26491	0.00597475	0.668723	-2.12542
ENSG00000099795	NDUFB7	NADH:ubiquinone oxidoreductase subunit B7 [Source:HGNC Symbol;Acc:HGNC:7702]	0.788558	6.89118	3.26039	0.00602757	0.668723	-2.2102
ENSG00000174705	SH3PXD2B	SH3 and PX domains 2B [Source:HGNC Symbol;Acc:HGNC:29242]	0.420698	6.15603	3.25508	0.00609012	0.668723	-2.22009
ENSG00000116990	MYCL	v-myc avian myelocytomatosis viral oncogene lung carcinoma derived homolog [Source:HGNC Symbol;Acc:HGNC:7555]	0.657749	2.27681	3.25402	0.00610275	0.668723	-2.10976
ENSG00000271380	NA	NA	0.784149	1.57955	3.24947	0.00615706	0.669233	-2.16278
ENSG00000183621	ZNF438	zinc finger protein 438 [Source:HGNC Symbol;Acc:HGNC:21029]	-0.482521	3.66852	-3.23236	0.00636545	0.686348	-2.16725
ENSG00000170075	GPR37L1	G protein-coupled receptor 37 like 1 [Source:HGNC Symbol;Acc:HGNC:14923]	0.957106	0.244394	3.22245	0.00648948	0.692225	-2.44137
ENSG00000111276	CDKN1B	cyclin dependent kinase inhibitor 1B [Source:HGNC Symbol;Acc:HGNC:1785]	0.329478	6.12252	3.21663	0.00656341	0.692225	-2.28935
ENSG00000147854	UHRF2	ubiquitin like with PHD and ring finger domains 2 [Source:HGNC Symbol;Acc:HGNC:12557]	-0.347949	6.77072	-3.21566	0.00657577	0.692225	-2.29246
ENSG00000163661	PTX3	pentraxin 3 [Source:HGNC Symbol;Acc:HGNC:9692]	-0.951263	3.03309	-3.2118	0.0066254	0.692225	-2.17641
ENSG00000172927	MYEOV	myeloma overexpressed [Source:HGNC Symbol;Acc:HGNC:7563]	-0.76429	3.66436	-3.19928	0.0067888	0.700137	-2.22113
ENSG00000105516	DBP	D-box binding PAR bZIP transcription factor [Source:HGNC Symbol;Acc:HGNC:2697]	0.597462	4.23678	3.19806	0.00680501	0.700137	-2.2628
ENSG00000185432	METTL7A	methyltransferase like 7A [Source:HGNC Symbol;Acc:HGNC:24550]	1.29898	-0.393863	3.19303	0.00687199	0.701671	-2.6448
ENSG00000106346	USP42	ubiquitin specific peptidase 42 [Source:HGNC Symbol;Acc:HGNC:20068]	-0.371952	5.64033	-3.16437	0.00726615	0.70822	-2.37578
ENSG00000226380	MIR29B1	microRNA 29a [Source:HGNC Symbol;Acc:HGNC:31616]	-0.72202	2.35818	-3.15597	0.00738587	0.70822	-2.26785
ENSG00000065183	WDR3	WD repeat domain 3 [Source:HGNC Symbol;Acc:HGNC:12755]	-0.358024	5.58174	-3.15114	0.00745561	0.70822	-2.39826
ENSG00000073008	PVR	poliovirus receptor [Source:HGNC Symbol;Acc:HGNC:9705]	-0.391028	6.30076	-3.1501	0.00747079	0.70822	-2.41
ENSG00000126458	RRAS	related RAS viral (r-ras) oncogene homolog [Source:HGNC Symbol;Acc:HGNC:10447]	-0.37831	4.44666	-3.14919	0.007484	0.70822	-2.35555
ENSG00000204060	FOXO6	forkhead box O6 [Source:HGNC Symbol;Acc:HGNC:24814]	0.756676	3.75499	3.14862	0.00749229	0.70822	-2.32238
ENSG00000023909	GCLM	glutamate-cysteine ligase modifier subunit [Source:HGNC Symbol;Acc:HGNC:4312]	-0.564415	6.58298	-3.14441	0.00755385	0.70822	-2.4207
ENSG00000244509	APOBEC3C	apolipoprotein B mRNA editing enzyme catalytic subunit 3C [Source:HGNC Symbol;Acc:HGNC:17353]	-0.474999	7.21138	-3.13881	0.0076367	0.70822	-2.42898
ENSG00000179051	RCC2	regulator of chromosome condensation 2 [Source:HGNC Symbol;Acc:HGNC:30297]	0.344845	9.39106	3.1374	0.00765772	0.70822	-2.41221
ENSG00000226332	NA	NA	0.460466	4.3174	3.13429	0.00770408	0.70822	-2.37967
ENSG00000073150	PANX2	pannexin 2 [Source:HGNC Symbol;Acc:HGNC:8600]	0.666416	3.55704	3.12925	0.00778009	0.70822	-2.34506
ENSG00000005812	FBXL3	F-box and leucine rich repeat protein 3 [Source:HGNC Symbol;Acc:HGNC:13599]	0.444978	3.07953	3.12513	0.00784273	0.70822	-2.32891
ENSG00000040341	STAU2	staufen double-stranded RNA binding protein 2 [Source:HGNC Symbol;Acc:HGNC:11371]	0.31002	4.94138	3.12506	0.00784376	0.70822	-2.42644
ENSG00000196693	ZNF33B	zinc finger protein 33B [Source:HGNC Symbol;Acc:HGNC:13097]	0.314601	5.02358	3.12447	0.00785277	0.70822	-2.43081
ENSG00000138771	SHROOM3	shroom family member 3 [Source:HGNC Symbol;Acc:HGNC:30422]	-0.39827	3.56333	-3.11611	0.00798161	0.70822	-2.36295
ENSG00000039139	DNAH5	dynein axonemal heavy chain 5 [Source:HGNC Symbol;Acc:HGNC:2950]	-0.489712	2.83719	-3.11559	0.00798964	0.70822	-2.33374
ENSG00000139714	MORN3	MORN repeat containing 3 [Source:HGNC Symbol;Acc:HGNC:29807]	0.711869	1.11089	3.10988	0.00807888	0.70822	-2.42219
ENSG00000106714	CNTNAP3	contactin associated protein-like 3 [Source:HGNC Symbol;Acc:HGNC:13834]	-1.17421	-0.174618	-3.10951	0.00808464	0.70822	-2.74655
ENSG00000275437	NA	NA	1.43832	-0.473345	3.10665	0.00812979	0.70822	-2.75991
ENSG00000157570	TSPAN18	tetraspanin 18 [Source:HGNC Symbol;Acc:HGNC:20660]	0.9436	0.305213	3.10385	0.00817416	0.70822	-2.57304
ENSG00000170542	SERPINB9	serpin family B member 9 [Source:HGNC Symbol;Acc:HGNC:8955]	-0.396706	5.03065	-3.10255	0.00819494	0.70822	-2.46703
ENSG00000137843	PAK6	p21 (RAC1) activated kinase 6 [Source:HGNC Symbol;Acc:HGNC:16061]	0.915767	2.64428	3.10197	0.00820422	0.70822	-2.35467
ENSG00000187595	ZNF385C	zinc finger protein 385C [Source:HGNC Symbol;Acc:HGNC:33722]	0.652269	2.10947	3.10156	0.00821069	0.70822	-2.35637
ENSG00000188483	IER5L	immediate early response 5 like [Source:HGNC Symbol;Acc:HGNC:23679]	-0.524697	6.27844	-3.09639	0.00829362	0.70822	-2.50618
ENSG00000182310	SPACA6	sperm acrosome associated 6 [Source:HGNC Symbol;Acc:HGNC:27113]	0.426945	4.10328	3.09636	0.00829417	0.70822	-2.43401
ENSG00000143786	CNIH3	cornichon family AMPA receptor auxiliary protein 3 [Source:HGNC Symbol;Acc:HGNC:26802]	-0.322125	5.23717	-3.09544	0.0083091	0.70822	-2.48831
ENSG00000159128	IFNGR2	interferon gamma receptor 2 (interferon gamma transducer 1) [Source:HGNC Symbol;Acc:HGNC:5440]	-0.427091	8.60729	-3.09261	0.00835487	0.70822	-2.50044
ENSG00000129245	FXR2	FMR1 autosomal homolog 2 [Source:HGNC Symbol;Acc:HGNC:4024]	-0.445243	7.5329	-3.08678	0.00845013	0.711818	-2.52029
ENSG00000168067	MAP4K2	mitogen-activated protein kinase kinase kinase kinase 2 [Source:HGNC Symbol;Acc:HGNC:6864]	0.501373	4.02532	3.0799	0.00856395	0.716925	-2.45822
ENSG00000246695	RASSF8-AS1	RASSF8 atnisense RNA 1 [Source:HGNC Symbol;Acc:HGNC:48637]	-0.487803	5.26483	-3.07302	0.00867939	0.717318	-2.52814
ENSG00000183696	UPP1	uridine phosphorylase 1 [Source:HGNC Symbol;Acc:HGNC:12576]	-0.529266	4.3552	-3.06995	0.0087314	0.717318	-2.48835
ENSG00000138316	ADAMTS14	ADAM metallopeptidase with thrombospondin type 1 motif 14 [Source:HGNC Symbol;Acc:HGNC:14899]	-1.28224	0.364788	-3.06911	0.00874562	0.717318	-2.66219
ENSG00000062716	VMP1	vacuole membrane protein 1 [Source:HGNC Symbol;Acc:HGNC:29559]	-0.303377	7.57128	-3.067	0.00878153	0.717318	-2.55541
ENSG00000167632	TRAPPC9	trafficking protein particle complex 9 [Source:HGNC Symbol;Acc:HGNC:30832]	0.385604	4.88748	3.04394	0.0091843	0.730458	-2.56869
ENSG00000169908	TM4SF1	transmembrane 4 L six family member 1 [Source:HGNC Symbol;Acc:HGNC:11853]	-0.598199	9.20567	-3.03878	0.00927692	0.730458	-2.59133
ENSG00000196950	SLC39A10	solute carrier family 39 member 10 [Source:HGNC Symbol;Acc:HGNC:20861]	-0.311249	6.52023	-3.02706	0.00949064	0.730458	-2.63199
ENSG00000185000	DGAT1	diacylglycerol O-acyltransferase 1 [Source:HGNC Symbol;Acc:HGNC:2843]	0.451958	4.55936	3.02685	0.00949455	0.730458	-2.58279
ENSG00000115648	MLPH	melanophilin [Source:HGNC Symbol;Acc:HGNC:29643]	-0.696102	2.53457	-3.02494	0.00952976	0.730458	-2.4765
ENSG00000165533	TTC8	tetratricopeptide repeat domain 8 [Source:HGNC Symbol;Acc:HGNC:20087]	0.31975	4.6894	3.02389	0.00954936	0.730458	-2.59469
ENSG00000170909	OSCAR	osteoclast associated, immunoglobulin-like receptor [Source:HGNC Symbol;Acc:HGNC:29960]	0.706892	1.97191	3.02213	0.00958197	0.730458	-2.48426
ENSG00000130164	LDLR	low density lipoprotein receptor [Source:HGNC Symbol;Acc:HGNC:6547]	-0.396851	5.94936	-3.02049	0.00961252	0.730458	-2.63947
ENSG00000255857	PXN-AS1	PXN antisense RNA 1 [Source:HGNC Symbol;Acc:HGNC:44123]	0.601449	1.95426	3.01839	0.009652	0.730458	-2.49058
ENSG00000160691	SHC1	SHC adaptor protein 1 [Source:HGNC Symbol;Acc:HGNC:10840]	-0.296411	7.61058	-3.01803	0.00965857	0.730458	-2.64285
ENSG00000114315	HES1	hes family bHLH transcription factor 1 [Source:HGNC Symbol;Acc:HGNC:5192]	-0.634896	3.59033	-3.01375	0.00973937	0.730458	-2.53777
ENSG00000214708	NA	NA	0.6767	1.93632	3.01242	0.00976446	0.730458	-2.50032
ENSG00000152413	HOMER1	homer scaffolding protein 1 [Source:HGNC Symbol;Acc:HGNC:17512]	-0.390789	5.26964	-3.00924	0.00982506	0.730458	-2.64288
ENSG00000131584	ACAP3	ArfGAP with coiled-coil, ankyrin repeat and PH domains 3 [Source:HGNC Symbol;Acc:HGNC:16754]	0.419	3.05873	3.00873	0.00983481	0.730458	-2.52389
ENSG00000279602	NA	NA	1.06739	0.364343	3.00491	0.00990798	0.730458	-2.6843
ENSG00000117226	GBP3	guanylate binding protein 3 [Source:HGNC Symbol;Acc:HGNC:4184]	-1.02034	0.603288	-3.0024	0.00995646	0.730458	-2.68448
ENSG00000006062	MAP3K14	mitogen-activated protein kinase kinase kinase 14 [Source:HGNC Symbol;Acc:HGNC:6853]	-0.411172	4.88305	-2.99725	0.0100565	0.730458	-2.64745
ENSG00000065802	ASB1	ankyrin repeat and SOCS box containing 1 [Source:HGNC Symbol;Acc:HGNC:16011]	-0.410312	6.08986	-2.99713	0.0100589	0.730458	-2.68305
ENSG00000143476	DTL	denticleless E3 ubiquitin protein ligase homolog [Source:HGNC Symbol;Acc:HGNC:30288]	-0.357089	4.55637	-2.99672	0.0100669	0.730458	-2.63103
ENSG00000125968	ID1	inhibitor of DNA binding 1, HLH protein [Source:HGNC Symbol;Acc:HGNC:5360]	-0.488316	6.57193	-2.9961	0.010079	0.730458	-2.68726
ENSG00000080823	MOK	MOK protein kinase [Source:HGNC Symbol;Acc:HGNC:9833]	-0.355709	9.6355	-2.99603	0.0100805	0.730458	-2.66287
ENSG00000184254	ALDH1A3	aldehyde dehydrogenase 1 family member A3 [Source:HGNC Symbol;Acc:HGNC:409]	-0.308397	5.75293	-2.98641	0.0102706	0.734884	-2.69745
ENSG00000116679	IVNS1ABP	influenza virus NS1A binding protein [Source:HGNC Symbol;Acc:HGNC:16951]	-0.324121	6.41703	-2.98279	0.0103431	0.734884	-2.71107
ENSG00000051596	THOC3	THO complex 3 [Source:HGNC Symbol;Acc:HGNC:19072]	0.962516	6.26072	2.98233	0.0103523	0.734884	-2.70946
ENSG00000160446	ZDHHC12	zinc finger DHHC-type containing 12 [Source:HGNC Symbol;Acc:HGNC:19159]	0.450575	4.03743	2.98007	0.0103979	0.734884	-2.63337
ENSG00000120800	UTP20	UTP20, small subunit processome component [Source:HGNC Symbol;Acc:HGNC:17897]	-0.297953	4.8607	-2.97926	0.0104142	0.734884	-2.67921
ENSG00000037897	METTL1	methyltransferase like 1 [Source:HGNC Symbol;Acc:HGNC:7030]	-0.375385	3.64349	-2.97038	0.0105954	0.734913	-2.61811
ENSG00000210196	MT-TP	mitochondrially encoded tRNA proline [Source:HGNC Symbol;Acc:HGNC:7494]	-0.877446	2.77153	-2.96803	0.0106437	0.734913	-2.5722
ENSG00000104998	IL27RA	interleukin 27 receptor subunit alpha [Source:HGNC Symbol;Acc:HGNC:17290]	-0.353643	8.06595	-2.96766	0.0106514	0.734913	-2.72874
ENSG00000148841	ITPRIP	inositol 1,4,5-trisphosphate receptor interacting protein [Source:HGNC Symbol;Acc:HGNC:29370]	-0.376082	4.41543	-2.96535	0.0106993	0.734913	-2.67753
ENSG00000269246	NA	NA	0.367562	4.94456	2.96366	0.0107345	0.734913	-2.71387
ENSG00000103485	QPRT	quinolinate phosphoribosyltransferase [Source:HGNC Symbol;Acc:HGNC:9755]	0.384962	5.10941	2.95827	0.0108475	0.734913	-2.73045
ENSG00000057704	TMCC3	transmembrane and coiled-coil domain family 3 [Source:HGNC Symbol;Acc:HGNC:29199]	0.685092	2.18872	2.95786	0.0108559	0.734913	-2.58267
ENSG00000213719	CLIC1	chloride intracellular channel 1 [Source:HGNC Symbol;Acc:HGNC:2062]	-0.720065	4.99739	-2.95753	0.010863	0.734913	-2.72002
ENSG00000124839	RAB17	RAB17, member RAS oncogene family [Source:HGNC Symbol;Acc:HGNC:16523]	0.713779	4.5408	2.95525	0.0109112	0.734913	-2.70802
ENSG00000161513	FDXR	ferredoxin reductase [Source:HGNC Symbol;Acc:HGNC:3642]	0.339174	7.10012	2.95295	0.0109599	0.734913	-2.76254
ENSG00000010818	HIVEP2	human immunodeficiency virus type I enhancer binding protein 2 [Source:HGNC Symbol;Acc:HGNC:4921]	-0.586266	3.4196	-2.95002	0.0110224	0.735443	-2.63601
ENSG00000164543	STK17A	serine/threonine kinase 17a [Source:HGNC Symbol;Acc:HGNC:11395]	-0.479159	4.69321	-2.93515	0.0113452	0.751045	-2.74641
ENSG00000198517	MAFK	MAF bZIP transcription factor K [Source:HGNC Symbol;Acc:HGNC:6782]	0.322529	4.41108	2.93413	0.0113677	0.751045	-2.73742
ENSG00000232442	NA	NA	0.322438	5.45755	2.9283	0.011497	0.7529	-2.79556
ENSG00000023697	DERA	deoxyribose-phosphate aldolase [Source:HGNC Symbol;Acc:HGNC:24269]	0.366556	4.69789	2.92687	0.0115288	0.7529	-2.7668
ENSG00000181467	RAP2B	RAP2B, member of RAS oncogene family [Source:HGNC Symbol;Acc:HGNC:9862]	-0.321774	7.37236	-2.92533	0.0115633	0.7529	-2.81047
ENSG00000273980	NA	NA	-0.86856	1.46703	-2.91822	0.0117239	0.756581	-2.67823
ENSG00000032444	PNPLA6	patatin like phospholipase domain containing 6 [Source:HGNC Symbol;Acc:HGNC:16268]	0.478488	3.92942	2.91786	0.0117321	0.756581	-2.73419
ENSG00000134030	CTIF	cap binding complex dependent translation initiation factor [Source:HGNC Symbol;Acc:HGNC:23925]	0.435617	3.20945	2.91517	0.0117935	0.756919	-2.68993
ENSG00000105855	ITGB8	integrin subunit beta 8 [Source:HGNC Symbol;Acc:HGNC:6163]	-0.368165	5.27059	-2.91155	0.0118766	0.75759	-2.81681
ENSG00000251474	RPL32P3	ribosomal protein L32 pseudogene 3 [Source:HGNC Symbol;Acc:HGNC:27024]	-0.353636	5.1892	-2.90798	0.011959	0.75759	-2.82011
ENSG00000260057	LINC01571	long intergenic non-protein coding RNA 1571 [Source:HGNC Symbol;Acc:HGNC:51384]	-0.54049	2.12986	-2.90739	0.0119726	0.75759	-2.66237
ENSG00000115286	NDUFS7	NADH:ubiquinone oxidoreductase core subunit S7 [Source:HGNC Symbol;Acc:HGNC:7714]	0.526283	4.15681	2.89892	0.0121709	0.759143	-2.78297
ENSG00000177679	SRRM3	serine/arginine repetitive matrix 3 [Source:HGNC Symbol;Acc:HGNC:26729]	-0.611008	3.01524	-2.89725	0.0122103	0.759143	-2.70085
ENSG00000013297	CLDN11	claudin 11 [Source:HGNC Symbol;Acc:HGNC:8514]	-0.522417	6.01285	-2.89131	0.0123517	0.759143	-2.8705
ENSG00000166262	FAM227B	family with sequence similarity 227 member B [Source:HGNC Symbol;Acc:HGNC:26543]	0.509461	2.18676	2.88921	0.0124021	0.759143	-2.69131
ENSG00000154133	ROBO4	roundabout guidance receptor 4 [Source:HGNC Symbol;Acc:HGNC:17985]	-1.31658	4.33598	-2.88749	0.0124435	0.759143	-2.79301
ENSG00000005100	DHX33	DEAH-box helicase 33 [Source:HGNC Symbol;Acc:HGNC:16718]	-0.284002	6.42673	-2.88419	0.0125234	0.759143	-2.8872
ENSG00000067057	PFKP	phosphofructokinase, platelet [Source:HGNC Symbol;Acc:HGNC:8878]	-0.419509	7.28201	-2.88318	0.0125479	0.759143	-2.88627
ENSG00000060749	QSER1	glutamine and serine rich 1 [Source:HGNC Symbol;Acc:HGNC:26154]	-0.260509	5.81207	-2.88262	0.0125614	0.759143	-2.88383
ENSG00000135519	KCNH3	potassium voltage-gated channel subfamily H member 3 [Source:HGNC Symbol;Acc:HGNC:6252]	0.816237	1.27023	2.88187	0.0125798	0.759143	-2.72986
ENSG00000165507	C10orf10	chromosome 10 open reading frame 10 [Source:HGNC Symbol;Acc:HGNC:23355]	-0.44684	6.43493	-2.87673	0.0127056	0.759143	-2.90021
ENSG00000166902	MRPL16	mitochondrial ribosomal protein L16 [Source:HGNC Symbol;Acc:HGNC:14476]	0.288883	5.40132	2.87585	0.0127273	0.759143	-2.88707
ENSG00000205664	NA	NA	-0.674129	1.7521	-2.87377	0.0127786	0.759143	-2.72311
ENSG00000267130	NA	NA	-0.759621	0.520633	-2.87176	0.0128286	0.759143	-2.85644
ENSG00000137474	MYO7A	myosin VIIA [Source:HGNC Symbol;Acc:HGNC:7606]	0.783638	0.968986	2.87124	0.0128415	0.759143	-2.77229
ENSG00000126705	AHDC1	AT-hook DNA binding motif containing 1 [Source:HGNC Symbol;Acc:HGNC:25230]	0.380801	5.01563	2.8709	0.0128501	0.759143	-2.88127
ENSG00000272636	DOC2B	double C2 domain beta [Source:HGNC Symbol;Acc:HGNC:2986]	-1.04888	0.388618	-2.86896	0.0128983	0.759143	-2.89383
ENSG00000108370	RGS9	regulator of G-protein signaling 9 [Source:HGNC Symbol;Acc:HGNC:10004]	0.543995	2.45275	2.86622	0.012967	0.759864	-2.73378
ENSG00000175602	CCDC85B	coiled-coil domain containing 85B [Source:HGNC Symbol;Acc:HGNC:24926]	-0.835635	4.02197	-2.85979	0.0131295	0.762714	-2.82857
ENSG00000143816	WNT9A	Wnt family member 9A [Source:HGNC Symbol;Acc:HGNC:12778]	0.549213	4.50014	2.85892	0.0131514	0.762714	-2.87509
ENSG00000272702	NA	NA	0.890869	0.372906	2.85744	0.0131893	0.762714	-2.86898
ENSG00000102595	UGGT2	UDP-glucose glycoprotein glucosyltransferase 2 [Source:HGNC Symbol;Acc:HGNC:15664]	-0.371371	4.27883	-2.85538	0.013242	0.762714	-2.86109
ENSG00000196584	XRCC2	X-ray repair cross complementing 2 [Source:HGNC Symbol;Acc:HGNC:12829]	-0.5041	3.60568	-2.85001	0.0133804	0.767113	-2.81982
ENSG00000112984	KIF20A	kinesin family member 20A [Source:HGNC Symbol;Acc:HGNC:9787]	0.321037	5.96375	2.84513	0.0135072	0.767113	-2.9534
ENSG00000151746	BICD1	BICD cargo adaptor 1 [Source:HGNC Symbol;Acc:HGNC:1049]	-0.480046	4.6925	-2.84391	0.0135392	0.767113	-2.90664
ENSG00000196420	S100A5	S100 calcium binding protein A5 [Source:HGNC Symbol;Acc:HGNC:10495]	-0.72695	1.33372	-2.84365	0.013546	0.767113	-2.79281
ENSG00000173846	PLK3	polo like kinase 3 [Source:HGNC Symbol;Acc:HGNC:2154]	-0.421949	3.93721	-2.83376	0.0138078	0.773399	-2.87375
ENSG00000125347	IRF1	interferon regulatory factor 1 [Source:HGNC Symbol;Acc:HGNC:6116]	-0.387181	6.16553	-2.8294	0.0139248	0.773399	-2.98286
ENSG00000111319	SCNN1A	sodium channel epithelial 1 alpha subunit [Source:HGNC Symbol;Acc:HGNC:10599]	-0.381083	4.5214	-2.82925	0.0139286	0.773399	-2.92252
ENSG00000127124	HIVEP3	human immunodeficiency virus type I enhancer binding protein 3 [Source:HGNC Symbol;Acc:HGNC:13561]	-0.380253	4.99632	-2.8282	0.0139572	0.773399	-2.95213
ENSG00000133195	SLC39A11	solute carrier family 39 member 11 [Source:HGNC Symbol;Acc:HGNC:14463]	0.330422	5.19672	2.82719	0.0139842	0.773399	-2.96602
ENSG00000185379	RAD51D	RAD51 paralog D [Source:HGNC Symbol;Acc:HGNC:9823]	-0.381025	4.16598	-2.82413	0.0140674	0.773399	-2.90706
ENSG00000161956	SENP3	SUMO1/sentrin/SMT3 specific peptidase 3 [Source:HGNC Symbol;Acc:HGNC:17862]	-0.396267	4.02108	-2.82195	0.0141267	0.773399	-2.90054
ENSG00000204876	NA	NA	-0.951673	0.732718	-2.82158	0.0141367	0.773399	-2.89258
ENSG00000147955	SIGMAR1	sigma non-opioid intracellular receptor 1 [Source:HGNC Symbol;Acc:HGNC:8157]	-0.343957	5.38582	-2.82011	0.0141771	0.773399	-2.98294
ENSG00000102048	ASB9	ankyrin repeat and SOCS box containing 9 [Source:HGNC Symbol;Acc:HGNC:17184]	0.343637	3.79982	2.81531	0.0143092	0.773399	-2.90135
ENSG00000144596	GRIP2	glutamate receptor interacting protein 2 [Source:HGNC Symbol;Acc:HGNC:23841]	-0.736235	2.91219	-2.81369	0.014354	0.773399	-2.8321
ENSG00000160325	CACFD1	calcium channel flower domain containing 1 [Source:HGNC Symbol;Acc:HGNC:1365]	0.40882	3.94858	2.81187	0.0144048	0.773399	-2.91871
ENSG00000124507	PACSIN1	protein kinase C and casein kinase substrate in neurons 1 [Source:HGNC Symbol;Acc:HGNC:8570]	0.894323	0.258709	2.81115	0.0144249	0.773399	-2.94459
ENSG00000151748	SAV1	salvador family WW domain containing protein 1 [Source:HGNC Symbol;Acc:HGNC:17795]	-0.539601	3.29837	-2.80903	0.0144841	0.773399	-2.86644
ENSG00000177707	NECTIN3	nectin cell adhesion molecule 3 [Source:HGNC Symbol;Acc:HGNC:17664]	-0.324145	4.69382	-2.80703	0.0145402	0.773399	-2.97304
ENSG00000132680	KIAA0907	KIAA0907 [Source:HGNC Symbol;Acc:HGNC:29145]	0.315551	5.78253	2.80579	0.0145751	0.773399	-3.02039
ENSG00000272068	NA	NA	-0.443418	5.09783	-2.79989	0.0147421	0.775848	-3.00611
ENSG00000103257	SLC7A5	solute carrier family 7 member 5 [Source:HGNC Symbol;Acc:HGNC:11063]	-0.662215	5.10363	-2.79944	0.0147551	0.775848	-3.00466
ENSG00000184307	ZDHHC23	zinc finger DHHC-type containing 23 [Source:HGNC Symbol;Acc:HGNC:28654]	-0.815107	0.791602	-2.79807	0.014794	0.775848	-2.9123
ENSG00000120727	PAIP2	poly(A) binding protein interacting protein 2 [Source:HGNC Symbol;Acc:HGNC:17970]	0.531584	6.69434	2.79155	0.0149815	0.780367	-3.05107
ENSG00000102265	TIMP1	TIMP metallopeptidase inhibitor 1 [Source:HGNC Symbol;Acc:HGNC:11820]	-0.36516	7.3298	-2.78936	0.0150449	0.780367	-3.05226
ENSG00000165887	ANKRD2	ankyrin repeat domain 2 [Source:HGNC Symbol;Acc:HGNC:495]	0.955573	3.20769	2.78641	0.0151312	0.780367	-2.90678
ENSG00000109321	AREG	amphiregulin [Source:HGNC Symbol;Acc:HGNC:651]	-0.456875	5.44717	-2.78492	0.0151747	0.780367	-3.04626
ENSG00000134852	CLOCK	clock circadian regulator [Source:HGNC Symbol;Acc:HGNC:2082]	-0.306848	4.91231	-2.7828	0.015237	0.780367	-3.02814
ENSG00000100297	MCM5	minichromosome maintenance complex component 5 [Source:HGNC Symbol;Acc:HGNC:6948]	-0.417327	6.56636	-2.78156	0.0152733	0.780367	-3.06934
ENSG00000121931	LRIF1	ligand dependent nuclear receptor interacting factor 1 [Source:HGNC Symbol;Acc:HGNC:30299]	-0.42515	4.22146	-2.78115	0.0152854	0.780367	-2.98517
ENSG00000104899	AMH	anti-Mullerian hormone [Source:HGNC Symbol;Acc:HGNC:464]	0.627382	2.44585	2.77873	0.0153571	0.781066	-2.87421
ENSG00000158125	XDH	xanthine dehydrogenase [Source:HGNC Symbol;Acc:HGNC:12805]	-0.565983	1.76551	-2.77632	0.0154288	0.781765	-2.86772
ENSG00000272734	ADIRF-AS1	ADIRF antisense RNA 1 [Source:HGNC Symbol;Acc:HGNC:45127]	0.410562	3.17037	2.77059	0.0156002	0.787489	-2.92991
ENSG00000092020	PPP2R3C	protein phosphatase 2 regulatory subunit B''gamma [Source:HGNC Symbol;Acc:HGNC:17485]	-0.616484	4.07301	-2.76854	0.0156621	0.787662	-2.99323
ENSG00000271937	NA	NA	1.10278	-0.395092	2.76486	0.0157738	0.788354	-3.11181
ENSG00000065613	SLK	STE20 like kinase [Source:HGNC Symbol;Acc:HGNC:11088]	-0.313659	7.77426	-2.76423	0.0157928	0.788354	-3.09258
ENSG00000167508	MVD	mevalonate diphosphate decarboxylase [Source:HGNC Symbol;Acc:HGNC:7529]	0.544807	4.80306	2.75717	0.0160094	0.794734	-3.07053
ENSG00000103855	CD276	CD276 molecule [Source:HGNC Symbol;Acc:HGNC:19137]	-0.489057	6.54703	-2.75438	0.016096	0.794734	-3.11718
ENSG00000279632	NA	NA	-2.31273	-0.971258	-2.75433	0.0160975	0.794734	-3.3486
ENSG00000275342	PRAG1	Tyrosine-protein kinase SgK223 [Source:UniProtKB/Swiss-Prot;Acc:Q86YV5]	-0.363967	4.69358	-2.74004	0.0165471	0.805075	-3.08949
ENSG00000236366	NA	NA	-1.1895	-0.0074038	-2.73956	0.0165624	0.805075	-3.11988
ENSG00000170525	PFKFB3	6-phosphofructo-2-kinase/fructose-2,6-biphosphatase 3 [Source:HGNC Symbol;Acc:HGNC:8874]	-0.552184	5.70664	-2.73904	0.0165792	0.805075	-3.13373
ENSG00000173166	RAPH1	Ras association (RalGDS/AF-6) and pleckstrin homology domains 1 [Source:HGNC Symbol;Acc:HGNC:14436]	-0.360595	4.4859	-2.73376	0.0167485	0.805075	-3.08677
ENSG00000175505	CLCF1	cardiotrophin-like cytokine factor 1 [Source:HGNC Symbol;Acc:HGNC:17412]	-0.43873	2.602	-2.72963	0.0168824	0.805075	-2.95555
ENSG00000197971	MBP	myelin basic protein [Source:HGNC Symbol;Acc:HGNC:6925]	-0.279897	7.63718	-2.72769	0.0169458	0.805075	-3.15823
ENSG00000171984	C20orf196	chromosome 20 open reading frame 196 [Source:HGNC Symbol;Acc:HGNC:26318]	0.695796	0.473008	2.72661	0.0169808	0.805075	-3.02213
ENSG00000180340	FZD2	frizzled class receptor 2 [Source:HGNC Symbol;Acc:HGNC:4040]	0.41018	3.89179	2.72617	0.0169954	0.805075	-3.06149
ENSG00000166035	LIPC	lipase C, hepatic type [Source:HGNC Symbol;Acc:HGNC:6619]	-0.732419	1.38552	-2.72188	0.0171363	0.805075	-2.96228
ENSG00000272226	NA	NA	-0.747018	0.991473	-2.72075	0.0171738	0.805075	-2.99257
ENSG00000002586	CD99	CD99 molecule [Source:HGNC Symbol;Acc:HGNC:7082]	0.346158	7.49175	2.72066	0.0171765	0.805075	-3.17117
ENSG00000262049	NA	NA	0.473069	2.78648	2.7171	0.0172949	0.805075	-2.99207
ENSG00000187049	TMEM216	transmembrane protein 216 [Source:HGNC Symbol;Acc:HGNC:25018]	0.965671	0.165398	2.7161	0.0173283	0.805075	-3.07486
ENSG00000182534	MXRA7	matrix remodeling associated 7 [Source:HGNC Symbol;Acc:HGNC:7541]	0.404944	3.48489	2.71476	0.0173728	0.805075	-3.04807
ENSG00000149548	CCDC15	coiled-coil domain containing 15 [Source:HGNC Symbol;Acc:HGNC:25798]	-0.580076	2.54678	-2.71418	0.0173922	0.805075	-2.97651
ENSG00000008405	CRY1	cryptochrome circadian clock 1 [Source:HGNC Symbol;Acc:HGNC:2384]	-0.391494	3.6148	-2.71407	0.0173961	0.805075	-3.05236
ENSG00000090661	CERS4	ceramide synthase 4 [Source:HGNC Symbol;Acc:HGNC:23747]	0.468998	2.68568	2.71298	0.0174324	0.805075	-2.99248
ENSG00000136718	IMP4	IMP4 homolog, U3 small nucleolar ribonucleoprotein [Source:HGNC Symbol;Acc:HGNC:30856]	-0.292271	5.83195	-2.71226	0.0174566	0.805075	-3.18512
ENSG00000196517	SLC6A9	solute carrier family 6 member 9 [Source:HGNC Symbol;Acc:HGNC:11056]	0.501345	2.85152	2.71139	0.017486	0.805075	-3.00569
ENSG00000152242	C18orf25	chromosome 18 open reading frame 25 [Source:HGNC Symbol;Acc:HGNC:28172]	0.40477	5.36939	2.71093	0.0175016	0.805075	-3.17668
ENSG00000133641	C12orf29	chromosome 12 open reading frame 29 [Source:HGNC Symbol;Acc:HGNC:25322]	-0.491155	2.06887	-2.70902	0.0175659	0.805285	-2.96942
ENSG00000102931	ARL2BP	ADP ribosylation factor like GTPase 2 binding protein [Source:HGNC Symbol;Acc:HGNC:17146]	0.318523	6.17041	2.7038	0.0177433	0.808068	-3.20504
ENSG00000161677	JOSD2	Josephin domain containing 2 [Source:HGNC Symbol;Acc:HGNC:28853]	0.780067	2.59157	2.70061	0.0178524	0.808068	-3.00726
ENSG00000172270	BSG	basigin (Ok blood group) [Source:HGNC Symbol;Acc:HGNC:1116]	0.543123	7.19165	2.69979	0.0178806	0.808068	-3.21009
ENSG00000143258	USP21	ubiquitin specific peptidase 21 [Source:HGNC Symbol;Acc:HGNC:12620]	0.492578	2.9565	2.6981	0.0179388	0.808068	-3.03504
ENSG00000130066	SAT1	spermidine/spermine N1-acetyltransferase 1 [Source:HGNC Symbol;Acc:HGNC:10540]	-0.43592	8.08484	-2.69108	0.0181828	0.808068	-3.21793
ENSG00000130513	GDF15	growth differentiation factor 15 [Source:HGNC Symbol;Acc:HGNC:30142]	-0.980325	1.83488	-2.69103	0.0181844	0.808068	-2.99522
ENSG00000145194	ECE2	endothelin converting enzyme 2 [Source:HGNC Symbol;Acc:HGNC:13275]	-0.613771	1.86395	-2.69036	0.018208	0.808068	-2.99568
ENSG00000272572	NA	NA	0.437375	2.68395	2.68701	0.0183257	0.808068	-3.03425
ENSG00000108846	ABCC3	ATP binding cassette subfamily C member 3 [Source:HGNC Symbol;Acc:HGNC:54]	-0.719384	1.93219	-2.68684	0.0183319	0.808068	-3.00112
ENSG00000107984	DKK1	dickkopf WNT signaling pathway inhibitor 1 [Source:HGNC Symbol;Acc:HGNC:2891]	-0.449352	3.78735	-2.68305	0.0184659	0.808068	-3.11848
ENSG00000214530	STARD10	StAR related lipid transfer domain containing 10 [Source:HGNC Symbol;Acc:HGNC:10666]	0.574463	1.80294	2.68234	0.0184911	0.808068	-3.0081
ENSG00000099194	SCD	stearoyl-CoA desaturase [Source:HGNC Symbol;Acc:HGNC:10571]	-0.57763	8.73446	-2.67958	0.0185895	0.808068	-3.23136
ENSG00000261840	NA	NA	0.598545	1.30449	2.67672	0.0186919	0.808068	-3.02318
ENSG00000118514	ALDH8A1	aldehyde dehydrogenase 8 family member A1 [Source:HGNC Symbol;Acc:HGNC:15471]	0.659752	2.30017	2.67526	0.0187444	0.808068	-3.03264
ENSG00000196358	NTNG2	netrin G2 [Source:HGNC Symbol;Acc:HGNC:14288]	-0.718296	2.02854	-2.67364	0.0188028	0.808068	-3.02225
ENSG00000160445	ZER1	zyg-11 related cell cycle regulator [Source:HGNC Symbol;Acc:HGNC:30960]	0.300374	4.4756	2.67223	0.0188536	0.808068	-3.19778
ENSG00000041802	LSG1	large 60S subunit nuclear export GTPase 1 [Source:HGNC Symbol;Acc:HGNC:25652]	-0.406166	5.94305	-2.67184	0.018868	0.808068	-3.25745
ENSG00000116661	FBXO2	F-box protein 2 [Source:HGNC Symbol;Acc:HGNC:13581]	0.488387	4.75627	2.6705	0.0189164	0.808068	-3.21878
ENSG00000250510	GPR162	G protein-coupled receptor 162 [Source:HGNC Symbol;Acc:HGNC:16693]	0.471453	3.26771	2.66839	0.0189933	0.808068	-3.10824
ENSG00000182809	CRIP2	cysteine rich protein 2 [Source:HGNC Symbol;Acc:HGNC:2361]	0.409387	4.95311	2.66821	0.0189999	0.808068	-3.23349
ENSG00000272990	NA	NA	0.683143	1.26887	2.66783	0.0190137	0.808068	-3.03717
ENSG00000197168	NEK5	NIMA related kinase 5 [Source:HGNC Symbol;Acc:HGNC:7748]	-0.623751	1.56254	-2.66486	0.0191227	0.808068	-3.03666
ENSG00000198142	SOWAHC	sosondowah ankyrin repeat domain family member C [Source:HGNC Symbol;Acc:HGNC:26149]	-0.357875	4.64213	-2.6623	0.0192169	0.808068	-3.22073
ENSG00000154447	SH3RF1	SH3 domain containing ring finger 1 [Source:HGNC Symbol;Acc:HGNC:17650]	-0.638224	2.73609	-2.66177	0.0192365	0.808068	-3.06965
ENSG00000158402	CDC25C	cell division cycle 25C [Source:HGNC Symbol;Acc:HGNC:1727]	0.30717	5.107	2.66043	0.019286	0.808068	-3.25446
ENSG00000188549	C15orf52	chromosome 15 open reading frame 52 [Source:HGNC Symbol;Acc:HGNC:33488]	-0.352797	3.72961	-2.65746	0.0193962	0.808068	-3.15852
ENSG00000046651	OFD1	OFD1, centriole and centriolar satellite protein [Source:HGNC Symbol;Acc:HGNC:2567]	-0.417104	4.64064	-2.65743	0.0193973	0.808068	-3.22862
ENSG00000189057	FAM111B	family with sequence similarity 111 member B [Source:HGNC Symbol;Acc:HGNC:24200]	-0.284662	5.22019	-2.65075	0.0196478	0.808068	-3.27384
ENSG00000183751	TBL3	transducin beta like 3 [Source:HGNC Symbol;Acc:HGNC:11587]	0.434588	2.7403	2.64979	0.0196838	0.808068	-3.09843
ENSG00000068831	RASGRP2	RAS guanyl releasing protein 2 [Source:HGNC Symbol;Acc:HGNC:9879]	0.643046	1.71183	2.64625	0.0198182	0.808068	-3.06181
ENSG00000247675	LRP4-AS1	LRP4 antisense RNA 1 [Source:HGNC Symbol;Acc:HGNC:44128]	0.384784	3.534	2.64601	0.0198273	0.808068	-3.16758
ENSG00000125827	TMX4	thioredoxin related transmembrane protein 4 [Source:HGNC Symbol;Acc:HGNC:25237]	-0.320786	4.62196	-2.64545	0.0198484	0.808068	-3.24901
ENSG00000136295	TTYH3	tweety family member 3 [Source:HGNC Symbol;Acc:HGNC:22222]	0.350689	7.42066	2.64375	0.0199132	0.808068	-3.30648
ENSG00000196668	LINC00173	long intergenic non-protein coding RNA 173 [Source:HGNC Symbol;Acc:HGNC:33791]	0.36297	3.94471	2.63948	0.0200771	0.808068	-3.21359
ENSG00000171368	TPPP	tubulin polymerization promoting protein [Source:HGNC Symbol;Acc:HGNC:24164]	0.461774	3.50767	2.63905	0.0200938	0.808068	-3.17739
ENSG00000245317	NA	NA	0.706827	0.565553	2.63834	0.0201212	0.808068	-3.12522
ENSG00000187997	C17orf99	chromosome 17 open reading frame 99 [Source:HGNC Symbol;Acc:HGNC:34490]	0.924867	0.427224	2.63464	0.0202642	0.808068	-3.14373
ENSG00000245248	USP2-AS1	USP2 antisense RNA 1 (head to head) [Source:HGNC Symbol;Acc:HGNC:48673]	-0.625924	1.28626	-2.63348	0.0203095	0.808068	-3.09112
ENSG00000078808	SDF4	stromal cell derived factor 4 [Source:HGNC Symbol;Acc:HGNC:24188]	0.324703	9.01542	2.63117	0.0203997	0.808068	-3.31147
ENSG00000261609	GAN	gigaxonin [Source:HGNC Symbol;Acc:HGNC:4137]	-0.368042	4.89305	-2.62848	0.0205051	0.808068	-3.29501
ENSG00000107872	FBXL15	F-box and leucine rich repeat protein 15 [Source:HGNC Symbol;Acc:HGNC:28155]	0.41337	3.41067	2.62755	0.0205416	0.808068	-3.18799
ENSG00000272954	NA	NA	0.545303	2.13695	2.62678	0.020572	0.808068	-3.10153
ENSG00000077238	IL4R	interleukin 4 receptor [Source:HGNC Symbol;Acc:HGNC:6015]	-0.378427	4.97725	-2.62126	0.0207908	0.808068	-3.31209
ENSG00000233184	NA	NA	-0.639425	1.5387	-2.61957	0.0208581	0.808068	-3.10317
ENSG00000154102	C16orf74	chromosome 16 open reading frame 74 [Source:HGNC Symbol;Acc:HGNC:23362]	0.429073	4.14598	2.6193	0.020869	0.808068	-3.26453
ENSG00000100151	PICK1	protein interacting with PRKCA 1 [Source:HGNC Symbol;Acc:HGNC:9394]	0.515509	2.04595	2.61875	0.0208912	0.808068	-3.11047
ENSG00000080608	PUM3	pumilio RNA binding family member 3 [Source:HGNC Symbol;Acc:HGNC:29676]	-0.352211	6.1223	-2.61811	0.0209165	0.808068	-3.35395
ENSG00000276957	NA	NA	0.763304	0.161583	2.61733	0.0209478	0.808068	-3.19618
ENSG00000246731	NA	uncharacterized protein MGC16275 [Source:EntrezGene;Acc:85001]	0.893602	-0.0724405	2.61624	0.0209918	0.808068	-3.22768
ENSG00000011243	AKAP8L	A-kinase anchoring protein 8 like [Source:HGNC Symbol;Acc:HGNC:29857]	0.529861	3.09759	2.6148	0.0210495	0.808068	-3.183
ENSG00000162909	CAPN2	calpain 2 [Source:HGNC Symbol;Acc:HGNC:1479]	-0.294236	6.88499	-2.61457	0.0210588	0.808068	-3.36192
ENSG00000130921	C12orf65	chromosome 12 open reading frame 65 [Source:HGNC Symbol;Acc:HGNC:26784]	0.269046	6.07012	2.61454	0.0210602	0.808068	-3.36019
ENSG00000255135	NA	NA	0.370339	3.34722	2.61442	0.0210651	0.808068	-3.20437
ENSG00000260526	NA	NA	1.25119	-0.631169	2.61375	0.0210919	0.808068	-3.31665
ENSG00000089159	PXN	paxillin [Source:HGNC Symbol;Acc:HGNC:9718]	-0.338688	7.68242	-2.61307	0.0211197	0.808068	-3.3582
ENSG00000111215	PRR4	proline rich 4 (lacrimal) [Source:HGNC Symbol;Acc:HGNC:18020]	-1.05709	1.88947	-2.6124	0.0211469	0.808068	-3.11208
ENSG00000151500	THYN1	thymocyte nuclear protein 1 [Source:HGNC Symbol;Acc:HGNC:29560]	0.302562	6.0283	2.61082	0.0212106	0.808068	-3.36616
ENSG00000273139	NA	NA	0.930175	-0.186893	2.60965	0.0212582	0.808068	-3.25137
ENSG00000101162	TUBB1	tubulin beta 1 class VI [Source:HGNC Symbol;Acc:HGNC:16257]	-0.847812	1.43573	-2.6092	0.0212769	0.808068	-3.12094
ENSG00000058668	ATP2B4	ATPase plasma membrane Ca2+ transporting 4 [Source:HGNC Symbol;Acc:HGNC:817]	-0.273795	6.10795	-2.60695	0.0213685	0.808068	-3.37344
ENSG00000175048	ZDHHC14	zinc finger DHHC-type containing 14 [Source:HGNC Symbol;Acc:HGNC:20341]	-0.26938	6.52459	-2.60398	0.0214905	0.808068	-3.38099
ENSG00000115295	CLIP4	CAP-Gly domain containing linker protein family member 4 [Source:HGNC Symbol;Acc:HGNC:26108]	-0.302619	3.67026	-2.60092	0.0216168	0.808068	-3.24919
ENSG00000117143	UAP1	UDP-N-acetylglucosamine pyrophosphorylase 1 [Source:HGNC Symbol;Acc:HGNC:12457]	-0.322148	5.65885	-2.59823	0.0217282	0.808068	-3.37998
ENSG00000182118	FAM89A	family with sequence similarity 89 member A [Source:HGNC Symbol;Acc:HGNC:25057]	-1.27529	0.497696	-2.59782	0.0217451	0.808068	-3.21219
ENSG00000146433	TMEM181	transmembrane protein 181 [Source:HGNC Symbol;Acc:HGNC:20958]	-0.327028	5.28539	-2.59773	0.0217488	0.808068	-3.36816
ENSG00000276698	NA	NA	0.678447	0.690472	2.59745	0.0217604	0.808068	-3.16791
ENSG00000151725	CENPU	centromere protein U [Source:HGNC Symbol;Acc:HGNC:21348]	-0.292206	4.4801	-2.5968	0.0217875	0.808068	-3.32275
ENSG00000138794	CASP6	caspase 6 [Source:HGNC Symbol;Acc:HGNC:1507]	0.362942	3.73618	2.5955	0.0218419	0.808068	-3.27009
ENSG00000029534	ANK1	ankyrin 1 [Source:HGNC Symbol;Acc:HGNC:492]	-0.452326	7.22141	-2.59412	0.0218998	0.808068	-3.39531
ENSG00000234284	ZNF879	zinc finger protein 879 [Source:HGNC Symbol;Acc:HGNC:37273]	1.18266	-0.581421	2.59303	0.0219454	0.808068	-3.32993
ENSG00000178821	TMEM52	transmembrane protein 52 [Source:HGNC Symbol;Acc:HGNC:27916]	1.05901	-0.0636695	2.59218	0.0219813	0.808068	-3.25447
ENSG00000152672	CLEC4F	C-type lectin domain family 4 member F [Source:HGNC Symbol;Acc:HGNC:25357]	1.03409	-0.221863	2.59151	0.0220091	0.808068	-3.27684
ENSG00000088305	DNMT3B	DNA methyltransferase 3 beta [Source:HGNC Symbol;Acc:HGNC:2979]	0.330704	4.48497	2.59148	0.0220104	0.808068	-3.33733
ENSG00000024862	CCDC28A	coiled-coil domain containing 28A [Source:HGNC Symbol;Acc:HGNC:21098]	0.273999	5.58124	2.59023	0.0220633	0.808068	-3.39346
ENSG00000146963	LUC7L2	LUC7 like 2, pre-mRNA splicing factor [Source:HGNC Symbol;Acc:HGNC:21608]	0.272631	8.36779	2.58801	0.022157	0.809302	-3.39353
ENSG00000112149	CD83	CD83 molecule [Source:HGNC Symbol;Acc:HGNC:1703]	-0.391557	3.43383	-2.58266	0.022385	0.810056	-3.25669
ENSG00000099282	TSPAN15	tetraspanin 15 [Source:HGNC Symbol;Acc:HGNC:23298]	0.365679	4.07599	2.58016	0.0224922	0.810056	-3.32527
ENSG00000159267	HLCS	holocarboxylase synthetase [Source:HGNC Symbol;Acc:HGNC:4976]	-0.305172	4.20098	-2.57972	0.0225111	0.810056	-3.33024
ENSG00000255153	TOLLIP-AS1	TOLLIP antisense RNA 1 (head to head) [Source:HGNC Symbol;Acc:HGNC:27403]	0.671558	0.84526	2.57857	0.0225608	0.810056	-3.18212
ENSG00000173065	FAM222B	family with sequence similarity 222 member B [Source:HGNC Symbol;Acc:HGNC:25563]	-0.329733	4.94988	-2.57768	0.022599	0.810056	-3.38624
ENSG00000144824	PHLDB2	pleckstrin homology like domain family B member 2 [Source:HGNC Symbol;Acc:HGNC:29573]	-0.370525	6.90651	-2.57586	0.0226778	0.810056	-3.42904
ENSG00000140105	WARS	tryptophanyl-tRNA synthetase [Source:HGNC Symbol;Acc:HGNC:12729]	-0.271508	7.34203	-2.57327	0.0227902	0.810056	-3.4304
ENSG00000122515	ZMIZ2	zinc finger MIZ-type containing 2 [Source:HGNC Symbol;Acc:HGNC:22229]	-0.327289	6.89427	-2.5726	0.0228195	0.810056	-3.43476
ENSG00000171159	C9orf16	chromosome 9 open reading frame 16 [Source:HGNC Symbol;Acc:HGNC:17823]	0.475045	2.42851	2.5724	0.0228284	0.810056	-3.20162
ENSG00000196421	LINC00176	long intergenic non-protein coding RNA 176 [Source:HGNC Symbol;Acc:HGNC:27655]	0.765045	0.388381	2.57013	0.0229273	0.810056	-3.22946
ENSG00000271788	NA	NA	0.499406	2.16939	2.57	0.0229331	0.810056	-3.19098
ENSG00000123545	NDUFAF4	NADH:ubiquinone oxidoreductase complex assembly factor 4 [Source:HGNC Symbol;Acc:HGNC:21034]	-0.354151	3.73642	-2.56941	0.022959	0.810056	-3.30738
ENSG00000229809	ZNF688	zinc finger protein 688 [Source:HGNC Symbol;Acc:HGNC:30489]	0.321702	3.44059	2.56743	0.0230459	0.810056	-3.29033
ENSG00000212694	LINC01089	long intergenic non-protein coding RNA 1089 [Source:HGNC Symbol;Acc:HGNC:27886]	0.505728	1.68127	2.56322	0.0232321	0.810056	-3.18519
ENSG00000265148	TSPOAP1-AS1	TSPOAP1 antisense RNA 1 [Source:HGNC Symbol;Acc:HGNC:44148]	0.814185	0.102318	2.56289	0.0232468	0.810056	-3.2689
ENSG00000145703	IQGAP2	IQ motif containing GTPase activating protein 2 [Source:HGNC Symbol;Acc:HGNC:6111]	-0.425329	3.50137	-2.56248	0.0232647	0.810056	-3.29606
ENSG00000073792	IGF2BP2	insulin like growth factor 2 mRNA binding protein 2 [Source:HGNC Symbol;Acc:HGNC:28867]	-0.305032	7.54998	-2.55377	0.0236547	0.810056	-3.46224
ENSG00000111540	RAB5B	RAB5B, member RAS oncogene family [Source:HGNC Symbol;Acc:HGNC:9784]	0.284153	6.39979	2.5534	0.0236717	0.810056	-3.46847
ENSG00000130725	UBE2M	ubiquitin conjugating enzyme E2 M [Source:HGNC Symbol;Acc:HGNC:12491]	0.324588	6.04757	2.55235	0.0237188	0.810056	-3.46769
ENSG00000070882	OSBPL3	oxysterol binding protein like 3 [Source:HGNC Symbol;Acc:HGNC:16370]	-0.295197	4.83998	-2.55132	0.0237655	0.810056	-3.42528
ENSG00000160741	CRTC2	CREB regulated transcription coactivator 2 [Source:HGNC Symbol;Acc:HGNC:27301]	0.962812	3.00233	2.55132	0.0237657	0.810056	-3.27872
ENSG00000099624	ATP5D	ATP synthase, H+ transporting, mitochondrial F1 complex, delta subunit [Source:HGNC Symbol;Acc:HGNC:837]	0.446093	5.61566	2.54712	0.0239566	0.810056	-3.46872
ENSG00000256235	SMIM3	small integral membrane protein 3 [Source:HGNC Symbol;Acc:HGNC:30248]	-0.417793	4.11326	-2.54575	0.0240194	0.810056	-3.37863
ENSG00000254363	NA	NA	0.5047	2.06384	2.54388	0.0241053	0.810056	-3.22623
ENSG00000272711	NA	NA	-0.468041	3.00241	-2.54271	0.0241592	0.810056	-3.28391
ENSG00000185261	KIAA0825	KIAA0825 [Source:HGNC Symbol;Acc:HGNC:28532]	-0.916309	-0.210982	-2.54115	0.0242312	0.810056	-3.36011
ENSG00000272789	NA	NA	0.918012	-0.147662	2.54021	0.0242746	0.810056	-3.32557
ENSG00000164331	ANKRA2	ankyrin repeat family A member 2 [Source:HGNC Symbol;Acc:HGNC:13208]	0.407562	3.91312	2.53943	0.0243109	0.810056	-3.38018
ENSG00000163481	RNF25	ring finger protein 25 [Source:HGNC Symbol;Acc:HGNC:14662]	-0.74432	1.53267	-2.53883	0.0243386	0.810056	-3.21953
ENSG00000129991	TNNI3	troponin I3, cardiac type [Source:HGNC Symbol;Acc:HGNC:11947]	0.446996	2.57842	2.53883	0.0243387	0.810056	-3.26482
ENSG00000225828	FAM229A	family with sequence similarity 229 member A [Source:HGNC Symbol;Acc:HGNC:44652]	0.724735	3.31696	2.53762	0.024395	0.810056	-3.32969
ENSG00000124882	EREG	epiregulin [Source:HGNC Symbol;Acc:HGNC:3443]	-0.527575	5.43701	-2.53671	0.0244373	0.810056	-3.47764
ENSG00000162641	AKNAD1	AKNA domain containing 1 [Source:HGNC Symbol;Acc:HGNC:28398]	0.606088	1.21128	2.53566	0.0244862	0.810056	-3.22626
ENSG00000260400	NA	NA	0.483541	2.49695	2.53555	0.0244913	0.810056	-3.26442
ENSG00000176170	SPHK1	sphingosine kinase 1 [Source:HGNC Symbol;Acc:HGNC:11240]	-0.69342	1.23691	-2.53443	0.0245435	0.810056	-3.23129
ENSG00000119669	IRF2BPL	interferon regulatory factor 2 binding protein like [Source:HGNC Symbol;Acc:HGNC:14282]	-0.345308	5.97093	-2.5332	0.0246011	0.810056	-3.49894
ENSG00000184232	OAF	out at first homolog [Source:HGNC Symbol;Acc:HGNC:28752]	0.301544	4.35748	2.5306	0.0247233	0.810056	-3.43161
ENSG00000105404	RABAC1	Rab acceptor 1 [Source:HGNC Symbol;Acc:HGNC:9794]	0.386904	5.80867	2.52908	0.024795	0.810056	-3.50419
ENSG00000176490	DIRAS1	DIRAS family GTPase 1 [Source:HGNC Symbol;Acc:HGNC:19127]	0.426842	2.94051	2.52647	0.0249185	0.810056	-3.31347
ENSG00000064651	SLC12A2	solute carrier family 12 member 2 [Source:HGNC Symbol;Acc:HGNC:10911]	-0.310611	6.32928	-2.52616	0.0249335	0.810056	-3.515
ENSG00000140750	ARHGAP17	Rho GTPase activating protein 17 [Source:HGNC Symbol;Acc:HGNC:18239]	0.353074	4.17453	2.52559	0.0249605	0.810056	-3.42579
ENSG00000153551	CMTM7	CKLF like MARVEL transmembrane domain containing 7 [Source:HGNC Symbol;Acc:HGNC:19178]	-0.269222	6.73675	-2.52336	0.0250668	0.810056	-3.52042
ENSG00000125630	POLR1B	RNA polymerase I subunit B [Source:HGNC Symbol;Acc:HGNC:20454]	-0.263845	4.23693	-2.52102	0.0251784	0.810056	-3.43327
ENSG00000132846	ZBED3	zinc finger BED-type containing 3 [Source:HGNC Symbol;Acc:HGNC:20711]	0.300108	4.1933	2.51958	0.0252477	0.810056	-3.43718
ENSG00000065413	ANKRD44	ankyrin repeat domain 44 [Source:HGNC Symbol;Acc:HGNC:25259]	-0.80949	0.797404	-2.51704	0.0253701	0.810056	-3.27829
ENSG00000250899	NA	NA	-0.523366	3.48823	-2.51683	0.0253801	0.810056	-3.36819
ENSG00000280451	NA	NA	-0.920786	-0.208934	-2.51608	0.0254167	0.810056	-3.38607
ENSG00000278619	MRM1	mitochondrial rRNA methyltransferase 1 [Source:HGNC Symbol;Acc:HGNC:26202]	-0.441989	2.20652	-2.51483	0.0254768	0.810056	-3.27295
ENSG00000078804	TP53INP2	tumor protein p53 inducible nuclear protein 2 [Source:HGNC Symbol;Acc:HGNC:16104]	0.38238	3.93751	2.5148	0.0254782	0.810056	-3.42356
ENSG00000138166	DUSP5	dual specificity phosphatase 5 [Source:HGNC Symbol;Acc:HGNC:3071]	-1.01098	3.07198	-2.51457	0.0254898	0.810056	-3.32653
ENSG00000197037	ZSCAN25	zinc finger and SCAN domain containing 25 [Source:HGNC Symbol;Acc:HGNC:21961]	0.525337	3.37336	2.51407	0.0255137	0.810056	-3.37353
ENSG00000274422	NA	NA	-1.05286	5.70307	-2.51373	0.0255303	0.810056	-3.52046
ENSG00000145476	CYP4V2	cytochrome P450 family 4 subfamily V member 2 [Source:HGNC Symbol;Acc:HGNC:23198]	-0.372276	3.38943	-2.51351	0.0255411	0.810056	-3.36705
ENSG00000196872	KIAA1211L	KIAA1211 like [Source:HGNC Symbol;Acc:HGNC:33454]	0.865388	1.45967	2.51287	0.025572	0.810056	-3.25669
ENSG00000184436	THAP7	THAP domain containing 7 [Source:HGNC Symbol;Acc:HGNC:23190]	0.256173	5.62897	2.51218	0.025606	0.810056	-3.52934
ENSG00000116741	RGS2	regulator of G-protein signaling 2 [Source:HGNC Symbol;Acc:HGNC:9998]	0.547504	2.44378	2.51127	0.0256502	0.810056	-3.29905
ENSG00000131724	IL13RA1	interleukin 13 receptor subunit alpha 1 [Source:HGNC Symbol;Acc:HGNC:5974]	-0.345672	8.21577	-2.51017	0.0257038	0.810056	-3.53002
ENSG00000183250	LINC01547	long intergenic non-protein coding RNA 1547 [Source:HGNC Symbol;Acc:HGNC:15707]	-0.979564	0.294896	-2.50935	0.0257442	0.810056	-3.33436
ENSG00000198805	PNP	purine nucleoside phosphorylase [Source:HGNC Symbol;Acc:HGNC:7892]	-0.312334	5.35624	-2.50894	0.0257643	0.810056	-3.52394
ENSG00000144791	LIMD1	LIM domains containing 1 [Source:HGNC Symbol;Acc:HGNC:6612]	0.296906	4.62523	2.50854	0.0257838	0.810056	-3.48845
ENSG00000272501	NA	NA	0.467442	3.29304	2.50494	0.0259608	0.811534	-3.38074
ENSG00000183242	WT1-AS	WT1 antisense RNA [Source:HGNC Symbol;Acc:HGNC:18135]	-0.895432	0.970263	-2.50393	0.0260107	0.811534	-3.28553
ENSG00000099860	GADD45B	growth arrest and DNA damage inducible beta [Source:HGNC Symbol;Acc:HGNC:4096]	0.378257	4.95804	2.50349	0.0260328	0.811534	-3.51746
ENSG00000184378	ACTRT3	actin related protein T3 [Source:HGNC Symbol;Acc:HGNC:24022]	0.47899	2.72759	2.50096	0.0261579	0.811534	-3.33673
ENSG00000230980	RPL36AP39	ribosomal protein L36a pseudogene 39 [Source:HGNC Symbol;Acc:HGNC:36074]	-0.726338	-0.118704	-2.50087	0.0261625	0.811534	-3.38789
ENSG00000160191	PDE9A	phosphodiesterase 9A [Source:HGNC Symbol;Acc:HGNC:8795]	0.349013	3.59019	2.498	0.0263057	0.811534	-3.41943
ENSG00000181444	ZNF467	zinc finger protein 467 [Source:HGNC Symbol;Acc:HGNC:23154]	0.53084	3.56343	2.49773	0.0263194	0.811534	-3.41798
ENSG00000237945	LINC00649	long intergenic non-protein coding RNA 649 [Source:HGNC Symbol;Acc:HGNC:44305]	0.287572	4.49399	2.49465	0.0264736	0.811534	-3.50271
ENSG00000127995	CASD1	CAS1 domain containing 1 [Source:HGNC Symbol;Acc:HGNC:16014]	-0.327113	3.76178	-2.49431	0.0264908	0.811534	-3.43524
ENSG00000138764	CCNG2	cyclin G2 [Source:HGNC Symbol;Acc:HGNC:1593]	0.371616	4.43218	2.49428	0.0264923	0.811534	-3.49909
ENSG00000275155	NA	NA	0.923133	-0.078469	2.49381	0.0265163	0.811534	-3.37074
ENSG00000104904	OAZ1	ornithine decarboxylase antizyme 1 [Source:HGNC Symbol;Acc:HGNC:8095]	0.243523	9.38877	2.49307	0.0265534	0.811534	-3.54483
ENSG00000152056	AP1S3	adaptor related protein complex 1 sigma 3 subunit [Source:HGNC Symbol;Acc:HGNC:18971]	-0.595847	4.29744	-2.48617	0.0269036	0.81259	-3.49185
ENSG00000182704	TSKU	tsukushi, small leucine rich proteoglycan [Source:HGNC Symbol;Acc:HGNC:28850]	-0.434633	3.77022	-2.48611	0.0269066	0.81259	-3.4478
ENSG00000074416	MGLL	monoglyceride lipase [Source:HGNC Symbol;Acc:HGNC:17038]	-1.03119	0.457478	-2.48436	0.0269962	0.81259	-3.34971
ENSG00000155903	RASA2	RAS p21 protein activator 2 [Source:HGNC Symbol;Acc:HGNC:9872]	-0.364939	3.96741	-2.48209	0.0271131	0.81259	-3.47397
ENSG00000143156	NME7	NME/NM23 family member 7 [Source:HGNC Symbol;Acc:HGNC:20461]	0.375108	3.55256	2.48208	0.0271136	0.81259	-3.44244
ENSG00000099203	TMED1	transmembrane p24 trafficking protein 1 [Source:HGNC Symbol;Acc:HGNC:17291]	0.3031	4.61352	2.48024	0.0272084	0.81259	-3.53562
ENSG00000165886	UBTD1	ubiquitin domain containing 1 [Source:HGNC Symbol;Acc:HGNC:25683]	0.310441	7.75543	2.4789	0.0272776	0.81259	-3.58793
ENSG00000127561	SYNGR3	synaptogyrin 3 [Source:HGNC Symbol;Acc:HGNC:11501]	0.856113	0.919982	2.4787	0.0272883	0.81259	-3.31286
ENSG00000162517	PEF1	penta-EF-hand domain containing 1 [Source:HGNC Symbol;Acc:HGNC:30009]	0.317077	4.26475	2.47838	0.0273049	0.81259	-3.51263
ENSG00000175567	UCP2	uncoupling protein 2 [Source:HGNC Symbol;Acc:HGNC:12518]	0.494132	2.51346	2.47676	0.0273888	0.81259	-3.35816
ENSG00000177427	MIEF2	mitochondrial elongation factor 2 [Source:HGNC Symbol;Acc:HGNC:17920]	0.367988	3.33082	2.4754	0.0274596	0.81259	-3.43212
ENSG00000197442	MAP3K5	mitogen-activated protein kinase kinase kinase 5 [Source:HGNC Symbol;Acc:HGNC:6857]	-1.0211	0.165769	-2.47507	0.027477	0.81259	-3.38851
ENSG00000163249	CCNYL1	cyclin Y like 1 [Source:HGNC Symbol;Acc:HGNC:26868]	-0.309828	3.81456	-2.47393	0.0275362	0.81259	-3.47406
ENSG00000205763	RP9P	retinitis pigmentosa 9 pseudogene [Source:HGNC Symbol;Acc:HGNC:33969]	-0.33203	4.69892	-2.47347	0.0275605	0.81259	-3.54795
ENSG00000141934	PLPP2	phospholipid phosphatase 2 [Source:HGNC Symbol;Acc:HGNC:9230]	-0.315589	7.11659	-2.47301	0.0275845	0.81259	-3.60483
ENSG00000214274	ANG	angiogenin [Source:HGNC Symbol;Acc:HGNC:483]	1.06465	0.187135	2.47226	0.0276234	0.81259	-3.36867
ENSG00000164379	FOXQ1	forkhead box Q1 [Source:HGNC Symbol;Acc:HGNC:20951]	-0.4928	1.99319	-2.47034	0.0277247	0.81259	-3.32929
ENSG00000163485	ADORA1	adenosine A1 receptor [Source:HGNC Symbol;Acc:HGNC:262]	-0.31963	4.05998	-2.46787	0.0278545	0.81259	-3.5065
ENSG00000027869	SH2D2A	SH2 domain containing 2A [Source:HGNC Symbol;Acc:HGNC:10821]	-0.548384	2.75924	-2.46622	0.0279421	0.81259	-3.38522
ENSG00000112739	PRPF4B	pre-mRNA processing factor 4B [Source:HGNC Symbol;Acc:HGNC:17346]	-0.455327	6.23276	-2.46374	0.0280739	0.81259	-3.62105
ENSG00000167981	ZNF597	zinc finger protein 597 [Source:HGNC Symbol;Acc:HGNC:26573]	-0.370806	3.09313	-2.46364	0.0280788	0.81259	-3.42069
ENSG00000197530	MIB2	mindbomb E3 ubiquitin protein ligase 2 [Source:HGNC Symbol;Acc:HGNC:30577]	0.425489	3.64014	2.46348	0.0280875	0.81259	-3.4815
ENSG00000111186	WNT5B	Wnt family member 5B [Source:HGNC Symbol;Acc:HGNC:16265]	0.553108	1.05035	2.4631	0.0281078	0.81259	-3.33045
ENSG00000166326	TRIM44	tripartite motif containing 44 [Source:HGNC Symbol;Acc:HGNC:19016]	-0.320817	5.94282	-2.46277	0.0281256	0.81259	-3.6194
ENSG00000142765	SYTL1	synaptotagmin like 1 [Source:HGNC Symbol;Acc:HGNC:15584]	0.439808	3.26397	2.46155	0.0281904	0.81259	-3.44872
ENSG00000176387	HSD11B2	hydroxysteroid 11-beta dehydrogenase 2 [Source:HGNC Symbol;Acc:HGNC:5209]	0.761714	0.171715	2.4594	0.0283057	0.81259	-3.38635
ENSG00000125149	C16orf70	chromosome 16 open reading frame 70 [Source:HGNC Symbol;Acc:HGNC:29564]	0.280409	3.76464	2.4589	0.0283324	0.81259	-3.50042
ENSG00000255200	NA	NA	0.669411	0.819529	2.4588	0.0283379	0.81259	-3.34352
ENSG00000214900	LINC01588	long intergenic non-protein coding RNA 1588 [Source:HGNC Symbol;Acc:HGNC:27503]	-0.5224	4.13614	-2.45863	0.028347	0.81259	-3.52577
ENSG00000054282	SDCCAG8	serologically defined colon cancer antigen 8 [Source:HGNC Symbol;Acc:HGNC:10671]	-0.324882	6.48489	-2.45771	0.0283967	0.81259	-3.63296
ENSG00000167971	CASKIN1	CASK interacting protein 1 [Source:HGNC Symbol;Acc:HGNC:20879]	0.717187	1.50005	2.44892	0.0288735	0.824486	-3.3494
ENSG00000072756	TRNT1	tRNA nucleotidyl transferase 1 [Source:HGNC Symbol;Acc:HGNC:17341]	-0.280098	3.82256	-2.44348	0.0291724	0.825224	-3.52568
ENSG00000206846	NA	Y RNA [Source:RFAM;Acc:RF00019]	-0.924857	0.178596	-2.44068	0.0293273	0.825224	-3.42853
ENSG00000186185	KIF18B	kinesin family member 18B [Source:HGNC Symbol;Acc:HGNC:27102]	0.408115	4.83747	2.44043	0.029341	0.825224	-3.61762
ENSG00000140398	NEIL1	nei like DNA glycosylase 1 [Source:HGNC Symbol;Acc:HGNC:18448]	0.360572	4.02375	2.43988	0.0293717	0.825224	-3.55643
ENSG00000253368	TRNP1	TMF1-regulated nuclear protein 1 [Source:HGNC Symbol;Acc:HGNC:34348]	-0.65498	2.421	-2.43929	0.0294045	0.825224	-3.39953
ENSG00000158828	PINK1	PTEN induced putative kinase 1 [Source:HGNC Symbol;Acc:HGNC:14581]	0.253233	6.555	2.43866	0.0294397	0.825224	-3.6656
ENSG00000230439	NA	NA	-0.596617	2.60715	-2.43819	0.0294656	0.825224	-3.41621
ENSG00000185825	BCAP31	B-cell receptor-associated protein 31 [Source:HGNC Symbol;Acc:HGNC:16695]	-0.461579	8.64174	-2.4377	0.029493	0.825224	-3.64906
ENSG00000144401	METTL21A	methyltransferase like 21A [Source:HGNC Symbol;Acc:HGNC:30476]	-0.355842	2.99483	-2.43699	0.0295327	0.825224	-3.45438
ENSG00000130770	ATPIF1	ATPase inhibitory factor 1 [Source:HGNC Symbol;Acc:HGNC:871]	0.356369	7.60533	2.43646	0.0295626	0.825224	-3.66186
ENSG00000166197	NOLC1	nucleolar and coiled-body phosphoprotein 1 [Source:HGNC Symbol;Acc:HGNC:15608]	-0.258089	6.46635	-2.43533	0.0296256	0.825224	-3.67117
ENSG00000089163	SIRT4	sirtuin 4 [Source:HGNC Symbol;Acc:HGNC:14932]	0.488138	1.72338	2.43518	0.0296341	0.825224	-3.37538
ENSG00000144118	RALB	RALB Ras like proto-oncogene B [Source:HGNC Symbol;Acc:HGNC:9840]	0.23045	8.20693	2.43327	0.0297413	0.826501	-3.66075
ENSG00000186130	ZBTB6	zinc finger and BTB domain containing 6 [Source:HGNC Symbol;Acc:HGNC:16764]	0.770645	1.27269	2.42957	0.0299504	0.827859	-3.37462
ENSG00000125821	DTD1	D-tyrosyl-tRNA deacylase 1 [Source:HGNC Symbol;Acc:HGNC:16219]	0.245055	7.08759	2.42942	0.0299585	0.827859	-3.67894
ENSG00000166068	SPRED1	sprouty related EVH1 domain containing 1 [Source:HGNC Symbol;Acc:HGNC:20249]	-0.326907	3.51566	-2.42602	0.0301517	0.827859	-3.52317
ENSG00000154553	PDLIM3	PDZ and LIM domain 3 [Source:HGNC Symbol;Acc:HGNC:20767]	-0.512413	3.0806	-2.42571	0.0301696	0.827859	-3.47758
ENSG00000248487	ABHD14A	abhydrolase domain containing 14A [Source:HGNC Symbol;Acc:HGNC:24538]	0.522975	1.66874	2.42485	0.0302186	0.827859	-3.38869
ENSG00000120675	DNAJC15	DnaJ heat shock protein family (Hsp40) member C15 [Source:HGNC Symbol;Acc:HGNC:20325]	0.303581	4.99996	2.42191	0.0303872	0.827859	-3.65815
ENSG00000142208	AKT1	AKT serine/threonine kinase 1 [Source:HGNC Symbol;Acc:HGNC:391]	0.302631	5.79472	2.42062	0.030461	0.827859	-3.68943
ENSG00000146112	PPP1R18	protein phosphatase 1 regulatory subunit 18 [Source:HGNC Symbol;Acc:HGNC:29413]	-0.322674	6.15273	-2.41634	0.0307085	0.827859	-3.70142
ENSG00000275025	NA	NA	1.18066	0.184637	2.41617	0.0307184	0.827859	-3.43665
ENSG00000023171	GRAMD1B	GRAM domain containing 1B [Source:HGNC Symbol;Acc:HGNC:29214]	-0.668932	2.97332	-2.41466	0.0308062	0.827859	-3.4834
ENSG00000174013	FBXO45	F-box protein 45 [Source:HGNC Symbol;Acc:HGNC:29148]	-0.313706	5.87277	-2.41358	0.0308689	0.827859	-3.70176
ENSG00000174136	RGMB	repulsive guidance molecule family member b [Source:HGNC Symbol;Acc:HGNC:26896]	-0.362696	6.07773	-2.4134	0.0308798	0.827859	-3.70535
ENSG00000106049	HIBADH	3-hydroxyisobutyrate dehydrogenase [Source:HGNC Symbol;Acc:HGNC:4907]	1.31136	1.77978	2.41264	0.0309236	0.827859	-3.40909
ENSG00000166780	C16orf45	chromosome 16 open reading frame 45 [Source:HGNC Symbol;Acc:HGNC:19213]	-0.324869	5.18272	-2.41256	0.0309286	0.827859	-3.68016
ENSG00000198740	ZNF652	zinc finger protein 652 [Source:HGNC Symbol;Acc:HGNC:29147]	0.313033	4.78739	2.41077	0.0310332	0.827859	-3.66443
ENSG00000197062	ZSCAN26	zinc finger and SCAN domain containing 26 [Source:HGNC Symbol;Acc:HGNC:12978]	0.319087	3.04913	2.40934	0.0311172	0.827859	-3.51161
ENSG00000186854	TRABD2A	TraB domain containing 2A [Source:HGNC Symbol;Acc:HGNC:27013]	-0.595883	3.33419	-2.40888	0.0311441	0.827859	-3.52828
ENSG00000096433	ITPR3	inositol 1,4,5-trisphosphate receptor type 3 [Source:HGNC Symbol;Acc:HGNC:6182]	-0.267488	7.05414	-2.40685	0.0312638	0.827859	-3.71795
ENSG00000234779	NA	NA	0.533836	1.5059	2.40674	0.03127	0.827859	-3.41005
ENSG00000167550	RHEBL1	Ras homolog enriched in brain like 1 [Source:HGNC Symbol;Acc:HGNC:21166]	-0.684383	2.95319	-2.4056	0.0313378	0.827859	-3.49477
ENSG00000165821	SALL2	spalt like transcription factor 2 [Source:HGNC Symbol;Acc:HGNC:10526]	0.306529	5.39635	2.40449	0.0314033	0.827859	-3.70558
ENSG00000125652	ALKBH7	alkB homolog 7 [Source:HGNC Symbol;Acc:HGNC:21306]	0.337018	4.3635	2.40399	0.0314327	0.827859	-3.6453
ENSG00000111321	LTBR	lymphotoxin beta receptor [Source:HGNC Symbol;Acc:HGNC:6718]	-0.441863	6.48915	-2.40298	0.031493	0.827859	-3.72582
ENSG00000160014	CALM3	calmodulin 3 [Source:HGNC Symbol;Acc:HGNC:1449]	0.374366	10.3376	2.40111	0.0316043	0.827859	-3.68724
ENSG00000261845	NA	NA	-0.932075	-0.0576071	-2.40061	0.031634	0.827859	-3.49633
ENSG00000158966	CACHD1	cache domain containing 1 [Source:HGNC Symbol;Acc:HGNC:29314]	-0.27809	4.19952	-2.40008	0.0316657	0.827859	-3.6323
ENSG00000178078	STAP2	signal transducing adaptor family member 2 [Source:HGNC Symbol;Acc:HGNC:30430]	0.363112	4.14342	2.39837	0.0317682	0.827859	-3.63615
ENSG00000186577	C6orf1	chromosome 6 open reading frame 1 [Source:HGNC Symbol;Acc:HGNC:1340]	-0.243129	5.52298	-2.39736	0.0318284	0.827859	-3.7203
ENSG00000117000	RLF	rearranged L-myc fusion [Source:HGNC Symbol;Acc:HGNC:10025]	-0.280015	5.71616	-2.39731	0.0318315	0.827859	-3.72587
ENSG00000173085	COQ2	coenzyme Q2, polyprenyltransferase [Source:HGNC Symbol;Acc:HGNC:25223]	0.244411	5.40256	2.39645	0.0318829	0.827859	-3.71935
ENSG00000165556	CDX2	caudal type homeobox 2 [Source:HGNC Symbol;Acc:HGNC:1806]	-0.476743	2.17345	-2.39562	0.0319334	0.827859	-3.45172
ENSG00000205791	LOH12CR2	loss of heterozygosity, 12, chromosomal region 2 (non-protein coding) [Source:HGNC Symbol;Acc:HGNC:26524]	0.650111	0.505716	2.39533	0.0319509	0.827859	-3.44093
ENSG00000149260	CAPN5	calpain 5 [Source:HGNC Symbol;Acc:HGNC:1482]	0.439461	2.86548	2.39517	0.0319603	0.827859	-3.51715
ENSG00000279483	NA	NA	-0.415742	3.56445	-2.39486	0.0319788	0.827859	-3.57829
ENSG00000138134	STAMBPL1	STAM binding protein like 1 [Source:HGNC Symbol;Acc:HGNC:24105]	-0.337021	3.78703	-2.39347	0.0320631	0.827859	-3.60393
ENSG00000272086	NA	NA	0.289761	4.07916	2.39337	0.0320689	0.827859	-3.63842
ENSG00000117036	ETV3	ETS variant 3 [Source:HGNC Symbol;Acc:HGNC:3492]	-0.643332	1.54358	-2.39217	0.0321418	0.827859	-3.42853
ENSG00000164855	TMEM184A	transmembrane protein 184A [Source:HGNC Symbol;Acc:HGNC:28797]	0.586855	0.863034	2.39065	0.0322335	0.827859	-3.43276
ENSG00000135541	AHI1	Abelson helper integration site 1 [Source:HGNC Symbol;Acc:HGNC:21575]	-0.280481	6.40495	-2.39022	0.03226	0.827859	-3.74748
ENSG00000105520	PLPPR2	phospholipid phosphatase related 2 [Source:HGNC Symbol;Acc:HGNC:29566]	0.279714	3.62607	2.38937	0.0323118	0.827859	-3.60133
ENSG00000230325	NA	NA	0.746183	0.202472	2.38937	0.0323119	0.827859	-3.46806
ENSG00000232931	LINC00342	long intergenic non-protein coding RNA 342 [Source:HGNC Symbol;Acc:HGNC:42470]	0.39167	3.20932	2.38841	0.0323699	0.827859	-3.56166
ENSG00000213930	GALT	galactose-1-phosphate uridylyltransferase [Source:HGNC Symbol;Acc:HGNC:4135]	0.293519	4.04195	2.38658	0.0324822	0.828513	-3.64609
ENSG00000107890	ANKRD26	ankyrin repeat domain 26 [Source:HGNC Symbol;Acc:HGNC:29186]	-0.626247	4.78639	-2.38598	0.0325184	0.828513	-3.69755
ENSG00000132825	PPP1R3D	protein phosphatase 1 regulatory subunit 3D [Source:HGNC Symbol;Acc:HGNC:9294]	0.52763	1.3716	2.38322	0.032688	0.831012	-3.44073
ENSG00000189306	RRP7A	ribosomal RNA processing 7 homolog A [Source:HGNC Symbol;Acc:HGNC:24286]	-0.253562	6.04306	-2.38238	0.0327398	0.831012	-3.75773
ENSG00000132669	RIN2	Ras and Rab interactor 2 [Source:HGNC Symbol;Acc:HGNC:18750]	-0.345592	6.52951	-2.37839	0.0329866	0.832107	-3.76769
ENSG00000135318	NT5E	5'-nucleotidase ecto [Source:HGNC Symbol;Acc:HGNC:8021]	-0.453587	6.62261	-2.37747	0.0330441	0.832107	-3.76916
ENSG00000205364	MT1M	metallothionein 1M [Source:HGNC Symbol;Acc:HGNC:14296]	0.606176	3.37482	2.37744	0.0330461	0.832107	-3.5968
ENSG00000168297	PXK	PX domain containing serine/threonine kinase like [Source:HGNC Symbol;Acc:HGNC:23326]	0.359908	2.77057	2.37646	0.0331069	0.832107	-3.53756
ENSG00000229563	LINC01204	long intergenic non-protein coding RNA 1204 [Source:HGNC Symbol;Acc:HGNC:49635]	-0.75341	1.67606	-2.37598	0.033137	0.832107	-3.45431
ENSG00000274922	NA	NA	0.470656	2.02045	2.37532	0.033178	0.832107	-3.47931
ENSG00000164938	TP53INP1	tumor protein p53 inducible nuclear protein 1 [Source:HGNC Symbol;Acc:HGNC:18022]	0.592634	2.85084	2.37289	0.0333304	0.832107	-3.55152
ENSG00000109458	GAB1	GRB2 associated binding protein 1 [Source:HGNC Symbol;Acc:HGNC:4066]	0.46007	2.26359	2.37285	0.0333326	0.832107	-3.50005
ENSG00000162961	DPY30	dpy-30, histone methyltransferase complex regulatory subunit [Source:HGNC Symbol;Acc:HGNC:24590]	0.25093	5.04637	2.37198	0.0333872	0.832107	-3.74455
ENSG00000198585	NUDT16	nudix hydrolase 16 [Source:HGNC Symbol;Acc:HGNC:26442]	0.285352	5.75331	2.37083	0.0334595	0.832107	-3.77273
ENSG00000089692	LAG3	lymphocyte activating 3 [Source:HGNC Symbol;Acc:HGNC:6476]	0.670937	2.08187	2.3702	0.0334995	0.832107	-3.49125
ENSG00000115163	CENPA	centromere protein A [Source:HGNC Symbol;Acc:HGNC:1851]	0.325826	5.10355	2.36977	0.0335264	0.832107	-3.75131
ENSG00000168538	TRAPPC11	trafficking protein particle complex 11 [Source:HGNC Symbol;Acc:HGNC:25751]	0.270842	4.20701	2.36685	0.0337111	0.832107	-3.69356
ENSG00000172037	LAMB2	laminin subunit beta 2 [Source:HGNC Symbol;Acc:HGNC:6487]	0.397501	4.91566	2.36608	0.0337601	0.832107	-3.74728
ENSG00000129219	PLD2	phospholipase D2 [Source:HGNC Symbol;Acc:HGNC:9068]	0.399488	2.81328	2.36546	0.0337994	0.832107	-3.559
ENSG00000125912	NCLN	nicalin [Source:HGNC Symbol;Acc:HGNC:26923]	-0.284718	7.85982	-2.36494	0.0338324	0.832107	-3.78087
ENSG00000136867	SLC31A2	solute carrier family 31 member 2 [Source:HGNC Symbol;Acc:HGNC:11017]	0.397475	2.52363	2.36494	0.0338325	0.832107	-3.53329
ENSG00000271335	NA	NA	0.580756	2.02581	2.36266	0.0339775	0.832349	-3.49884
ENSG00000070814	TCOF1	treacle ribosome biogenesis factor 1 [Source:HGNC Symbol;Acc:HGNC:11654]	-0.405399	7.50967	-2.36256	0.0339842	0.832349	-3.78885
ENSG00000023445	BIRC3	baculoviral IAP repeat containing 3 [Source:HGNC Symbol;Acc:HGNC:591]	-0.58394	5.04825	-2.36011	0.0341412	0.832349	-3.75806
ENSG00000118600	TMEM5	transmembrane protein 5 [Source:HGNC Symbol;Acc:HGNC:13530]	-0.45197	2.21911	-2.35981	0.0341605	0.832349	-3.50979
ENSG00000154529	CNTNAP3B	contactin associated protein-like 3B [Source:HGNC Symbol;Acc:HGNC:32035]	-0.57728	2.33944	-2.35972	0.0341659	0.832349	-3.51612
ENSG00000182979	MTA1	metastasis associated 1 [Source:HGNC Symbol;Acc:HGNC:7410]	0.304068	8.08266	2.35899	0.0342129	0.832349	-3.78753
ENSG00000261526	NA	NA	0.383367	3.76282	2.3568	0.034354	0.833398	-3.66854
ENSG00000188186	LAMTOR4	late endosomal/lysosomal adaptor, MAPK and MTOR activator 4 [Source:HGNC Symbol;Acc:HGNC:33772]	0.210869	7.2121	2.35641	0.0343797	0.833398	-3.80143
ENSG00000140526	ABHD2	abhydrolase domain containing 2 [Source:HGNC Symbol;Acc:HGNC:18717]	0.260025	5.64338	2.355	0.0344705	0.833691	-3.79669
ENSG00000101188	NTSR1	neurotensin receptor 1 (high affinity) [Source:HGNC Symbol;Acc:HGNC:8039]	-0.65654	2.81776	-2.35351	0.0345669	0.833691	-3.56563
ENSG00000282057	NA	NA	-0.865312	-0.0609634	-2.35226	0.0346481	0.833691	-3.5495
ENSG00000082515	MRPL22	mitochondrial ribosomal protein L22 [Source:HGNC Symbol;Acc:HGNC:14480]	0.24045	5.69292	2.35153	0.0346959	0.833691	-3.8038
ENSG00000198018	ENTPD7	ectonucleoside triphosphate diphosphohydrolase 7 [Source:HGNC Symbol;Acc:HGNC:19745]	-0.572085	1.12449	-2.35145	0.034701	0.833691	-3.48286
ENSG00000149541	B3GAT3	beta-1,3-glucuronyltransferase 3 [Source:HGNC Symbol;Acc:HGNC:923]	-0.356641	4.16831	-2.34884	0.0348715	0.833895	-3.71303
ENSG00000126953	TIMM8A	translocase of inner mitochondrial membrane 8 homolog A (yeast) [Source:HGNC Symbol;Acc:HGNC:11817]	-0.254985	3.9785	-2.34853	0.034892	0.833895	-3.69726
ENSG00000166579	NDEL1	nudE neurodevelopment protein 1 like 1 [Source:HGNC Symbol;Acc:HGNC:17620]	0.351618	4.8501	2.34848	0.0348951	0.833895	-3.77266
ENSG00000133119	RFC3	replication factor C subunit 3 [Source:HGNC Symbol;Acc:HGNC:9971]	-0.386425	5.017	-2.34713	0.0349839	0.834183	-3.78038
ENSG00000164933	SLC25A32	solute carrier family 25 member 32 [Source:HGNC Symbol;Acc:HGNC:29683]	-0.312218	3.57148	-2.34641	0.035031	0.834183	-3.65866
ENSG00000256940	NA	NA	-0.392466	3.47729	-2.34459	0.0351513	0.834982	-3.64993
ENSG00000154263	ABCA10	ATP binding cassette subfamily A member 10 [Source:HGNC Symbol;Acc:HGNC:30]	-0.620322	3.5225	-2.34402	0.0351885	0.834982	-3.65183
ENSG00000196208	GREB1	growth regulation by estrogen in breast cancer 1 [Source:HGNC Symbol;Acc:HGNC:24885]	0.439125	2.18618	2.34117	0.0353778	0.836473	-3.54213
ENSG00000107731	UNC5B	unc-5 netrin receptor B [Source:HGNC Symbol;Acc:HGNC:12568]	-0.525665	1.46677	-2.34106	0.0353848	0.836473	-3.49919
ENSG00000151093	OXSM	3-oxoacyl-ACP synthase, mitochondrial [Source:HGNC Symbol;Acc:HGNC:26063]	0.327825	2.95823	2.34027	0.0354374	0.836473	-3.61259
ENSG00000116991	SIPA1L2	signal induced proliferation associated 1 like 2 [Source:HGNC Symbol;Acc:HGNC:23800]	-0.475328	3.73581	-2.33555	0.0357523	0.84243	-3.69006
ENSG00000184216	IRAK1	interleukin 1 receptor associated kinase 1 [Source:HGNC Symbol;Acc:HGNC:6112]	-0.284815	8.90105	-2.32883	0.0362059	0.85114	-3.82907
ENSG00000072062	PRKACA	protein kinase cAMP-activated catalytic subunit alpha [Source:HGNC Symbol;Acc:HGNC:9380]	0.288553	8.8899	2.3282	0.0362483	0.85114	-3.82944
ENSG00000105821	DNAJC2	DnaJ heat shock protein family (Hsp40) member C2 [Source:HGNC Symbol;Acc:HGNC:13192]	-0.219738	7.40488	-2.32716	0.036319	0.851317	-3.84912
ENSG00000066739	ATG2B	autophagy related 2B [Source:HGNC Symbol;Acc:HGNC:20187]	0.3003	4.54185	2.32621	0.0363837	0.851353	-3.78827
ENSG00000175029	CTBP2	C-terminal binding protein 2 [Source:HGNC Symbol;Acc:HGNC:2495]	-0.359614	6.56134	-2.32389	0.0365424	0.853584	-3.85933
ENSG00000267733	NA	NA	0.62715	0.569507	2.32089	0.0367483	0.856854	-3.53233
ENSG00000147459	DOCK5	dedicator of cytokinesis 5 [Source:HGNC Symbol;Acc:HGNC:23476]	-0.307894	4.12284	-2.31938	0.0368523	0.856854	-3.75802
ENSG00000122483	CCDC18	coiled-coil domain containing 18 [Source:HGNC Symbol;Acc:HGNC:30370]	-0.501259	4.75949	-2.31733	0.0369945	0.856854	-3.81157
ENSG00000135976	ANKRD36	ankyrin repeat domain 36 [Source:HGNC Symbol;Acc:HGNC:24079]	-0.930615	1.78997	-2.3145	0.0371905	0.856854	-3.54561
ENSG00000231131	LINC01468	long intergenic non-protein coding RNA 1468 [Source:HGNC Symbol;Acc:HGNC:50913]	-0.704979	0.832778	-2.3136	0.0372536	0.856854	-3.53786
ENSG00000205090	TMEM240	transmembrane protein 240 [Source:HGNC Symbol;Acc:HGNC:25186]	0.762807	0.856844	2.31324	0.0372783	0.856854	-3.53502
ENSG00000107175	CREB3	cAMP responsive element binding protein 3 [Source:HGNC Symbol;Acc:HGNC:2347]	-0.334407	4.5786	-2.31307	0.03729	0.856854	-3.80706
ENSG00000197943	PLCG2	phospholipase C gamma 2 [Source:HGNC Symbol;Acc:HGNC:9066]	0.366274	3.62016	2.31298	0.0372963	0.856854	-3.72541
ENSG00000272269	NA	NA	-0.349007	2.4916	-2.31206	0.0373612	0.856854	-3.60491
ENSG00000164169	PRMT9	protein arginine methyltransferase 9 [Source:HGNC Symbol;Acc:HGNC:25099]	0.300901	3.47704	2.31081	0.0374481	0.856854	-3.71347
ENSG00000253929	CASC21	cancer susceptibility candidate 21 (non-protein coding) [Source:HGNC Symbol;Acc:HGNC:49836]	-0.907354	1.19208	-2.31081	0.0374485	0.856854	-3.5373
ENSG00000112039	FANCE	Fanconi anemia complementation group E [Source:HGNC Symbol;Acc:HGNC:3586]	-0.304924	4.82421	-2.30921	0.037561	0.856854	-3.83179
ENSG00000183722	LHFP	lipoma HMGIC fusion partner [Source:HGNC Symbol;Acc:HGNC:6586]	-1.09934	0.337396	-2.30843	0.0376153	0.856854	-3.57024
ENSG00000142632	ARHGEF19	Rho guanine nucleotide exchange factor 19 [Source:HGNC Symbol;Acc:HGNC:26604]	-0.247195	5.48241	-2.30823	0.0376296	0.856854	-3.86831
ENSG00000163312	HELQ	helicase, POLQ-like [Source:HGNC Symbol;Acc:HGNC:18536]	0.42204	1.86274	2.30664	0.037742	0.856854	-3.571
ENSG00000126456	IRF3	interferon regulatory factor 3 [Source:HGNC Symbol;Acc:HGNC:6118]	-0.267057	4.68239	-2.30611	0.0377794	0.856854	-3.82751
ENSG00000012211	PRICKLE3	prickle planar cell polarity protein 3 [Source:HGNC Symbol;Acc:HGNC:6645]	-1.0372	-0.391768	-2.30581	0.0378001	0.856854	-3.63544
ENSG00000132879	FBXO44	F-box protein 44 [Source:HGNC Symbol;Acc:HGNC:24847]	0.401419	4.25413	2.30361	0.0379565	0.856854	-3.80229
ENSG00000272918	NA	NA	0.480852	2.00125	2.30233	0.0380472	0.856854	-3.58676
ENSG00000267534	S1PR2	sphingosine-1-phosphate receptor 2 [Source:HGNC Symbol;Acc:HGNC:3169]	-0.715218	2.88417	-2.30078	0.0381577	0.856854	-3.6532
ENSG00000201649	RNY4P34	RNA, Ro-associated Y4 pseudogene 34 [Source:HGNC Symbol;Acc:HGNC:50882]	-0.58186	2.17357	-2.30007	0.0382079	0.856854	-3.59235
ENSG00000268129	NA	NA	0.367889	3.48837	2.29692	0.0384339	0.856854	-3.7374
ENSG00000132510	KDM6B	lysine demethylase 6B [Source:HGNC Symbol;Acc:HGNC:29012]	-0.542736	3.02657	-2.29691	0.0384342	0.856854	-3.67647
ENSG00000079462	PAFAH1B3	platelet activating factor acetylhydrolase 1b catalytic subunit 3 [Source:HGNC Symbol;Acc:HGNC:8576]	0.368247	4.40941	2.29595	0.0385034	0.856854	-3.828
ENSG00000197150	ABCB8	ATP binding cassette subfamily B member 8 [Source:HGNC Symbol;Acc:HGNC:49]	0.371007	4.14549	2.29546	0.0385386	0.856854	-3.80573
ENSG00000197381	ADARB1	adenosine deaminase, RNA specific B1 [Source:HGNC Symbol;Acc:HGNC:226]	-0.250276	4.41164	-2.29544	0.0385403	0.856854	-3.82355
ENSG00000118762	PKD2	polycystin 2, transient receptor potential cation channel [Source:HGNC Symbol;Acc:HGNC:9009]	-0.437579	3.2012	-2.29537	0.0385452	0.856854	-3.69882
ENSG00000272556	GTF2IP13	general transcription factor IIi pseudogene 13 [Source:HGNC Symbol;Acc:HGNC:51725]	0.735643	1.18172	2.29387	0.0386533	0.856854	-3.56171
ENSG00000141526	SLC16A3	solute carrier family 16 member 3 [Source:HGNC Symbol;Acc:HGNC:10924]	-0.408036	7.67296	-2.29348	0.0386812	0.856854	-3.90266
ENSG00000143224	PPOX	protoporphyrinogen oxidase [Source:HGNC Symbol;Acc:HGNC:9280]	0.271686	4.45362	2.29345	0.0386838	0.856854	-3.8352
ENSG00000264548	NA	NA	0.717381	1.63433	2.2929	0.0387235	0.856854	-3.57842
ENSG00000230615	NA	NA	-0.84535	0.108278	-2.29202	0.0387869	0.856854	-3.60159
ENSG00000168502	MTCL1	microtubule crosslinking factor 1 [Source:HGNC Symbol;Acc:HGNC:29121]	-0.310896	4.34123	-2.2916	0.0388174	0.856854	-3.82277
ENSG00000180537	RNF182	ring finger protein 182 [Source:HGNC Symbol;Acc:HGNC:28522]	-0.321697	7.25086	-2.28979	0.038949	0.856854	-3.91296
ENSG00000186166	CCDC84	coiled-coil domain containing 84 [Source:HGNC Symbol;Acc:HGNC:30460]	0.291621	4.11451	2.28917	0.038994	0.856854	-3.81289
ENSG00000229656	NA	NA	-0.820217	0.443118	-2.28881	0.0390203	0.856854	-3.58543
ENSG00000270049	NA	NA	0.465239	2.3321	2.28773	0.0390988	0.856854	-3.63513
ENSG00000149089	APIP	APAF1 interacting protein [Source:HGNC Symbol;Acc:HGNC:17581]	0.53027	4.24624	2.28737	0.0391254	0.856854	-3.82849
ENSG00000198648	STK39	serine/threonine kinase 39 [Source:HGNC Symbol;Acc:HGNC:17717]	-0.323471	3.71239	-2.28617	0.0392129	0.856854	-3.77037
ENSG00000198879	SFMBT2	Scm-like with four mbt domains 2 [Source:HGNC Symbol;Acc:HGNC:20256]	0.565136	1.31701	2.28551	0.0392611	0.856854	-3.57621
ENSG00000276136	NA	NA	0.761213	-0.317641	2.28271	0.0394669	0.856854	-3.63319
ENSG00000197016	ZNF470	zinc finger protein 470 [Source:HGNC Symbol;Acc:HGNC:22220]	-0.407095	2.4138	-2.28132	0.0395695	0.856854	-3.64356
ENSG00000171045	TSNARE1	t-SNARE domain containing 1 [Source:HGNC Symbol;Acc:HGNC:26437]	0.819063	0.232498	2.28106	0.0395888	0.856854	-3.59606
ENSG00000149179	C11orf49	chromosome 11 open reading frame 49 [Source:HGNC Symbol;Acc:HGNC:28720]	0.244177	4.78847	2.27805	0.0398118	0.856854	-3.88513
ENSG00000197852	FAM212B	family with sequence similarity 212 member B [Source:HGNC Symbol;Acc:HGNC:28045]	0.622711	1.11326	2.27682	0.0399032	0.856854	-3.58374
ENSG00000277602	NA	NA	0.43687	3.05358	2.27594	0.0399686	0.856854	-3.72443
ENSG00000267940	NA	NA	0.419357	2.8808	2.27585	0.0399755	0.856854	-3.70644
ENSG00000247157	LINC01252	long intergenic non-protein coding RNA 1252 [Source:HGNC Symbol;Acc:HGNC:27888]	-0.672046	0.742077	-2.27515	0.0400275	0.856854	-3.58925
ENSG00000182389	CACNB4	calcium voltage-gated channel auxiliary subunit beta 4 [Source:HGNC Symbol;Acc:HGNC:1404]	-0.685848	0.543068	-2.27416	0.0401014	0.856854	-3.59734
ENSG00000124313	IQSEC2	IQ motif and Sec7 domain 2 [Source:HGNC Symbol;Acc:HGNC:29059]	0.377584	4.28892	2.27416	0.0401019	0.856854	-3.85337
ENSG00000136213	CHST12	carbohydrate sulfotransferase 12 [Source:HGNC Symbol;Acc:HGNC:17423]	0.30209	5.96738	2.27348	0.0401525	0.856854	-3.93931
ENSG00000105355	PLIN3	perilipin 3 [Source:HGNC Symbol;Acc:HGNC:16893]	-0.282511	9.13514	-2.27198	0.0402645	0.856854	-3.92048
ENSG00000171148	TADA3	transcriptional adaptor 3 [Source:HGNC Symbol;Acc:HGNC:19422]	-0.306449	3.77067	-2.27078	0.0403547	0.856854	-3.8018
ENSG00000123989	CHPF	chondroitin polymerizing factor [Source:HGNC Symbol;Acc:HGNC:24291]	-0.591179	4.98724	-2.2703	0.0403914	0.856854	-3.90311
ENSG00000271122	NA	NA	0.384219	4.31133	2.26991	0.0404208	0.856854	-3.86245
ENSG00000170458	CD14	CD14 molecule [Source:HGNC Symbol;Acc:HGNC:1628]	-0.562681	1.53033	-2.2681	0.0405572	0.856854	-3.60263
ENSG00000183617	MRPL54	mitochondrial ribosomal protein L54 [Source:HGNC Symbol;Acc:HGNC:16685]	0.225951	5.57744	2.26799	0.0405651	0.856854	-3.9398
ENSG00000198301	SDAD1	SDA1 domain containing 1 [Source:HGNC Symbol;Acc:HGNC:25537]	-0.462298	4.18015	-2.26654	0.0406753	0.856854	-3.84706
ENSG00000153162	BMP6	bone morphogenetic protein 6 [Source:HGNC Symbol;Acc:HGNC:1073]	-1.51463	-0.557989	-2.26592	0.0407217	0.856854	-3.70411
ENSG00000140650	PMM2	phosphomannomutase 2 [Source:HGNC Symbol;Acc:HGNC:9115]	-1.08585	0.908568	-2.2653	0.0407692	0.856854	-3.59966
ENSG00000111012	CYP27B1	cytochrome P450 family 27 subfamily B member 1 [Source:HGNC Symbol;Acc:HGNC:2606]	-0.619265	0.566523	-2.26465	0.0408183	0.856854	-3.60787
ENSG00000119547	ONECUT2	one cut homeobox 2 [Source:HGNC Symbol;Acc:HGNC:8139]	-0.533935	1.98617	-2.26374	0.0408876	0.856854	-3.6341
ENSG00000055163	CYFIP2	cytoplasmic FMR1 interacting protein 2 [Source:HGNC Symbol;Acc:HGNC:13760]	-1.05499	-0.629763	-2.26367	0.0408932	0.856854	-3.70501
ENSG00000268403	NA	NA	0.297981	3.32469	2.26039	0.0411438	0.856854	-3.77764
ENSG00000169499	PLEKHA2	pleckstrin homology domain containing A2 [Source:HGNC Symbol;Acc:HGNC:14336]	0.217756	5.10495	2.26001	0.0411726	0.856854	-3.93363
ENSG00000101079	NDRG3	NDRG family member 3 [Source:HGNC Symbol;Acc:HGNC:14462]	0.248952	7.29004	2.25937	0.0412216	0.856854	-3.96245
ENSG00000275576	NA	NA	0.622449	0.44216	2.25932	0.0412254	0.856854	-3.61375
ENSG00000179604	CDC42EP4	CDC42 effector protein 4 [Source:HGNC Symbol;Acc:HGNC:17147]	0.293664	4.29266	2.25879	0.0412665	0.856854	-3.87848
ENSG00000272017	NA	NA	0.586076	0.561033	2.25769	0.0413505	0.856854	-3.61217
ENSG00000173894	CBX2	chromobox 2 [Source:HGNC Symbol;Acc:HGNC:1552]	-0.25414	5.83409	-2.25732	0.041379	0.856854	-3.96283
ENSG00000229348	HYI-AS1	HYI antisense RNA 1 [Source:HGNC Symbol;Acc:HGNC:41173]	0.685697	1.09159	2.25732	0.0413792	0.856854	-3.60979
ENSG00000137413	TAF8	TATA-box binding protein associated factor 8 [Source:HGNC Symbol;Acc:HGNC:17300]	0.333553	4.03528	2.25693	0.0414093	0.856854	-3.85794
ENSG00000268043	NBPF12	neuroblastoma breakpoint family member 12 [Source:HGNC Symbol;Acc:HGNC:24297]	0.642682	0.750229	2.25599	0.0414819	0.856854	-3.61081
ENSG00000120693	SMAD9	SMAD family member 9 [Source:HGNC Symbol;Acc:HGNC:6774]	-0.729405	0.647619	-2.25547	0.041522	0.856854	-3.6168
ENSG00000111707	SUDS3	SDS3 homolog, SIN3A corepressor complex component [Source:HGNC Symbol;Acc:HGNC:29545]	0.27761	4.57319	2.25525	0.041539	0.856854	-3.90722
ENSG00000226742	HSBP1L1	heat shock factor binding protein 1 like 1 [Source:HGNC Symbol;Acc:HGNC:37243]	0.339946	3.74825	2.25495	0.0415623	0.856854	-3.83195
ENSG00000276097	NA	NA	0.899662	-0.431349	2.25398	0.0416372	0.856854	-3.67358
ENSG00000224043	CCNT2-AS1	CCNT2 antisense RNA 1 [Source:HGNC Symbol;Acc:HGNC:40130]	0.60238	0.965358	2.25192	0.0417974	0.856854	-3.61558
ENSG00000167202	TBC1D2B	TBC1 domain family member 2B [Source:HGNC Symbol;Acc:HGNC:29183]	0.330972	4.97489	2.25175	0.0418101	0.856854	-3.94017
ENSG00000172460	PRSS30P	protease, serine, 30 pseudogene [Source:HGNC Symbol;Acc:HGNC:28753]	-1.25919	3.6425	-2.25147	0.0418318	0.856854	-3.79606
ENSG00000116254	CHD5	chromodomain helicase DNA binding protein 5 [Source:HGNC Symbol;Acc:HGNC:16816]	-0.500042	3.48157	-2.25034	0.0419204	0.856854	-3.79939
ENSG00000137106	GRHPR	glyoxylate and hydroxypyruvate reductase [Source:HGNC Symbol;Acc:HGNC:4570]	0.249895	6.65801	2.25016	0.0419341	0.856854	-3.98179
ENSG00000187957	DNER	delta/notch like EGF repeat containing [Source:HGNC Symbol;Acc:HGNC:24456]	-0.360607	7.09568	-2.24802	0.0421012	0.856854	-3.98344
ENSG00000196502	SULT1A1	sulfotransferase family 1A member 1 [Source:HGNC Symbol;Acc:HGNC:11453]	0.383371	4.72204	2.24737	0.0421523	0.856854	-3.93128
ENSG00000168497	SDPR	serum deprivation response [Source:HGNC Symbol;Acc:HGNC:10690]	-0.331559	4.26057	-2.24576	0.0422789	0.856854	-3.89023
ENSG00000095321	CRAT	carnitine O-acetyltransferase [Source:HGNC Symbol;Acc:HGNC:2342]	0.310242	5.78964	2.24519	0.042323	0.856854	-3.98289
ENSG00000101457	DNTTIP1	deoxynucleotidyltransferase terminal interacting protein 1 [Source:HGNC Symbol;Acc:HGNC:16160]	-0.360927	6.35925	-2.24502	0.0423367	0.856854	-3.98976
ENSG00000140455	USP3	ubiquitin specific peptidase 3 [Source:HGNC Symbol;Acc:HGNC:12626]	-0.318735	3.41629	-2.24454	0.0423746	0.856854	-3.80451
ENSG00000260804	NA	DKFZp434H1419 [Source:EntrezGene;Acc:150967]	0.268812	4.40384	2.2438	0.0424328	0.856854	-3.91227
ENSG00000206560	ANKRD28	ankyrin repeat domain 28 [Source:HGNC Symbol;Acc:HGNC:29024]	-0.242821	5.79855	-2.24265	0.0425232	0.856854	-3.98632
ENSG00000105427	CNFN	cornifelin [Source:HGNC Symbol;Acc:HGNC:30183]	0.547963	1.48495	2.2411	0.0426462	0.856854	-3.64427
ENSG00000197121	PGAP1	post-GPI attachment to proteins 1 [Source:HGNC Symbol;Acc:HGNC:25712]	-0.239787	5.84283	-2.24039	0.0427025	0.856854	-3.99101
ENSG00000166917	MIR202HG	MIR202 host gene [Source:HGNC Symbol;Acc:HGNC:49402]	-0.626861	3.31387	-2.23994	0.0427382	0.856854	-3.79353
ENSG00000119711	ALDH6A1	aldehyde dehydrogenase 6 family member A1 [Source:HGNC Symbol;Acc:HGNC:7179]	0.26522	5.93205	2.23984	0.0427465	0.856854	-3.99441
ENSG00000261596	NA	NA	-1.07618	1.14881	-2.23867	0.0428391	0.856854	-3.63288
ENSG00000107290	SETX	senataxin [Source:HGNC Symbol;Acc:HGNC:445]	-0.238858	5.8219	-2.23865	0.0428407	0.856854	-3.99344
ENSG00000141384	TAF4B	TATA-box binding protein associated factor 4b [Source:HGNC Symbol;Acc:HGNC:11538]	-0.570853	2.21188	-2.23839	0.042861	0.856854	-3.68877
ENSG00000089123	TASP1	taspase 1 [Source:HGNC Symbol;Acc:HGNC:15859]	-0.473128	1.48606	-2.23775	0.0429126	0.856854	-3.64425
ENSG00000144036	EXOC6B	exocyst complex component 6B [Source:HGNC Symbol;Acc:HGNC:17085]	0.211328	5.30983	2.2364	0.0430202	0.857732	-3.98219
ENSG00000165092	ALDH1A1	aldehyde dehydrogenase 1 family member A1 [Source:HGNC Symbol;Acc:HGNC:402]	0.270954	7.4975	2.23466	0.043159	0.859228	-4.00098
ENSG00000141699	FAM134C	family with sequence similarity 134 member C [Source:HGNC Symbol;Acc:HGNC:27258]	-0.636315	7.03943	-2.23303	0.0432899	0.860562	-4.00843
ENSG00000171951	SCG2	secretogranin II [Source:HGNC Symbol;Acc:HGNC:10575]	-0.424279	4.27432	-2.23036	0.0435053	0.861544	-3.91501
ENSG00000075240	GRAMD4	GRAM domain containing 4 [Source:HGNC Symbol;Acc:HGNC:29113]	0.65017	1.98262	2.22998	0.0435355	0.861544	-3.69217
ENSG00000203780	FANK1	fibronectin type III and ankyrin repeat domains 1 [Source:HGNC Symbol;Acc:HGNC:23527]	0.398211	2.30085	2.22904	0.0436116	0.861544	-3.72035
ENSG00000055044	NOP58	NOP58 ribonucleoprotein [Source:HGNC Symbol;Acc:HGNC:29926]	-0.378472	6.84521	-2.22879	0.0436317	0.861544	-4.01666
ENSG00000082512	TRAF5	TNF receptor associated factor 5 [Source:HGNC Symbol;Acc:HGNC:12035]	-0.262673	4.50335	-2.22844	0.0436608	0.861544	-3.94045
ENSG00000166747	AP1G1	adaptor related protein complex 1 gamma 1 subunit [Source:HGNC Symbol;Acc:HGNC:555]	0.275938	7.10967	2.22767	0.0437228	0.861544	-4.01631
ENSG00000152475	ZNF837	zinc finger protein 837 [Source:HGNC Symbol;Acc:HGNC:25164]	0.711774	1.07734	2.22474	0.0439612	0.863362	-3.65317
ENSG00000276115	NA	NA	-0.561674	3.68944	-2.22167	0.0442118	0.863362	-3.86636
ENSG00000092978	GPATCH2	G-patch domain containing 2 [Source:HGNC Symbol;Acc:HGNC:25499]	-0.363759	4.17707	-2.22098	0.0442684	0.863362	-3.92191
ENSG00000140481	CCDC33	coiled-coil domain containing 33 [Source:HGNC Symbol;Acc:HGNC:26552]	0.507783	2.2304	2.22088	0.0442766	0.863362	-3.72642
ENSG00000146054	TRIM7	tripartite motif containing 7 [Source:HGNC Symbol;Acc:HGNC:16278]	0.296989	4.2607	2.22071	0.0442903	0.863362	-3.93741
ENSG00000164610	RP9	retinitis pigmentosa 9 (autosomal dominant) [Source:HGNC Symbol;Acc:HGNC:10288]	-0.277518	4.60043	-2.21943	0.0443961	0.863362	-3.96279
ENSG00000176974	SHMT1	serine hydroxymethyltransferase 1 [Source:HGNC Symbol;Acc:HGNC:10850]	0.282188	5.09774	2.21861	0.0444635	0.863362	-4.00122
ENSG00000136003	ISCU	iron-sulfur cluster assembly enzyme [Source:HGNC Symbol;Acc:HGNC:29882]	0.324473	5.68522	2.21853	0.0444702	0.863362	-4.02424
ENSG00000135919	SERPINE2	serpin family E member 2 [Source:HGNC Symbol;Acc:HGNC:8951]	-0.614576	1.4566	-2.21825	0.0444933	0.863362	-3.66829
ENSG00000116903	EXOC8	exocyst complex component 8 [Source:HGNC Symbol;Acc:HGNC:24659]	0.252429	4.16463	2.21713	0.0445855	0.863362	-3.93398
ENSG00000138678	GPAT3	glycerol-3-phosphate acyltransferase 3 [Source:HGNC Symbol;Acc:HGNC:28157]	-0.575687	3.23668	-2.21437	0.0448144	0.863362	-3.82672
ENSG00000151806	GUF1	GUF1 homolog, GTPase [Source:HGNC Symbol;Acc:HGNC:25799]	-0.2795	3.91307	-2.21377	0.044864	0.863362	-3.90831
ENSG00000105514	RAB3D	RAB3D, member RAS oncogene family [Source:HGNC Symbol;Acc:HGNC:9779]	0.257842	5.04972	2.21319	0.0449119	0.863362	-4.0074
ENSG00000136943	CTSV	cathepsin V [Source:HGNC Symbol;Acc:HGNC:2538]	0.447472	5.83835	2.21274	0.0449493	0.863362	-4.03691
ENSG00000142694	EVA1B	eva-1 homolog B [Source:HGNC Symbol;Acc:HGNC:25558]	0.710686	2.88788	2.20995	0.0451826	0.863362	-3.81006
ENSG00000110060	PUS3	pseudouridylate synthase 3 [Source:HGNC Symbol;Acc:HGNC:25461]	-0.274113	3.8545	-2.20979	0.0451958	0.863362	-3.90866
ENSG00000269113	TRABD2B	TraB domain containing 2B [Source:HGNC Symbol;Acc:HGNC:44200]	-0.976615	-0.334673	-2.20977	0.0451978	0.863362	-3.73092
ENSG00000135211	TMEM60	transmembrane protein 60 [Source:HGNC Symbol;Acc:HGNC:21754]	0.341562	3.44855	2.20923	0.0452426	0.863362	-3.87254
ENSG00000132470	ITGB4	integrin subunit beta 4 [Source:HGNC Symbol;Acc:HGNC:6158]	-0.274608	8.60069	-2.20821	0.0453286	0.863362	-4.0319
ENSG00000235903	CPB2-AS1	CPB2 antisense RNA 1 [Source:HGNC Symbol;Acc:HGNC:39898]	0.558494	1.70866	2.20807	0.0453403	0.863362	-3.70377
ENSG00000127220	ABHD8	abhydrolase domain containing 8 [Source:HGNC Symbol;Acc:HGNC:23759]	0.405966	2.95193	2.20566	0.0455424	0.863362	-3.82258
ENSG00000142065	ZFP14	ZFP14 zinc finger protein [Source:HGNC Symbol;Acc:HGNC:29312]	0.276155	4.1835	2.20502	0.0455967	0.863362	-3.95549
ENSG00000100644	HIF1A	hypoxia inducible factor 1 alpha subunit [Source:HGNC Symbol;Acc:HGNC:4910]	-0.236817	5.35107	-2.20353	0.0457226	0.863362	-4.03575
ENSG00000222009	BTBD19	BTB domain containing 19 [Source:HGNC Symbol;Acc:HGNC:27145]	-0.560407	0.745394	-2.20298	0.0457692	0.863362	-3.67974
ENSG00000176476	SGF29	SAGA complex associated factor 29 [Source:HGNC Symbol;Acc:HGNC:25156]	0.349695	2.82388	2.20296	0.0457706	0.863362	-3.81238
ENSG00000160818	GPATCH4	G-patch domain containing 4 [Source:HGNC Symbol;Acc:HGNC:25982]	-0.25104	6.25499	-2.20282	0.0457829	0.863362	-4.0587
ENSG00000123933	MXD4	MAX dimerization protein 4 [Source:HGNC Symbol;Acc:HGNC:13906]	0.520002	6.17214	2.20262	0.0457992	0.863362	-4.05798
ENSG00000177721	ANXA2R	annexin A2 receptor [Source:HGNC Symbol;Acc:HGNC:33463]	0.455749	1.95912	2.20173	0.0458745	0.863362	-3.73103
ENSG00000169035	KLK7	kallikrein related peptidase 7 [Source:HGNC Symbol;Acc:HGNC:6368]	-0.366094	2.80124	-2.19992	0.0460285	0.863362	-3.80575
ENSG00000181090	EHMT1	euchromatic histone lysine methyltransferase 1 [Source:HGNC Symbol;Acc:HGNC:24650]	0.217198	5.60533	2.19942	0.0460714	0.863362	-4.05331
ENSG00000234678	NA	NA	0.694632	-0.101249	2.19941	0.0460725	0.863362	-3.70996
ENSG00000122507	BBS9	Bardet-Biedl syndrome 9 [Source:HGNC Symbol;Acc:HGNC:30000]	0.516161	2.4579	2.19702	0.0462758	0.863362	-3.78396
ENSG00000187514	PTMA	prothymosin, alpha [Source:HGNC Symbol;Acc:HGNC:9623]	-0.449661	10.5311	-2.19642	0.0463274	0.863362	-4.02404
ENSG00000168765	GSTM4	glutathione S-transferase mu 4 [Source:HGNC Symbol;Acc:HGNC:4636]	0.383139	3.64825	2.19636	0.046333	0.863362	-3.91484
ENSG00000117153	KLHL12	kelch like family member 12 [Source:HGNC Symbol;Acc:HGNC:19360]	0.233623	5.83448	2.19608	0.0463566	0.863362	-4.06446
ENSG00000132906	CASP9	caspase 9 [Source:HGNC Symbol;Acc:HGNC:1511]	0.31916	3.44281	2.19545	0.0464111	0.863362	-3.89346
ENSG00000158528	PPP1R9A	protein phosphatase 1 regulatory subunit 9A [Source:HGNC Symbol;Acc:HGNC:14946]	-0.927581	0.106533	-2.19526	0.0464271	0.863362	-3.71388
ENSG00000184162	NR2C2AP	nuclear receptor 2C2 associated protein [Source:HGNC Symbol;Acc:HGNC:30763]	-0.350481	4.63317	-2.19404	0.0465315	0.863362	-4.00557
ENSG00000121104	FAM117A	family with sequence similarity 117 member A [Source:HGNC Symbol;Acc:HGNC:24179]	0.643005	1.62388	2.19359	0.0465709	0.863362	-3.71896
ENSG00000146072	TNFRSF21	TNF receptor superfamily member 21 [Source:HGNC Symbol;Acc:HGNC:13469]	-0.454436	2.1324	-2.1934	0.0465868	0.863362	-3.74891
ENSG00000049860	HEXB	hexosaminidase subunit beta [Source:HGNC Symbol;Acc:HGNC:4879]	0.307232	7.9641	2.1926	0.046656	0.863362	-4.06441
ENSG00000075702	WDR62	WD repeat domain 62 [Source:HGNC Symbol;Acc:HGNC:24502]	0.392348	4.2763	2.19062	0.0468268	0.863362	-3.98757
ENSG00000273142	NA	NA	0.398043	2.69583	2.19019	0.0468641	0.863362	-3.81843
ENSG00000182612	TSPAN10	tetraspanin 10 [Source:HGNC Symbol;Acc:HGNC:29942]	0.40615	1.65256	2.18988	0.0468908	0.863362	-3.72539
ENSG00000170006	TMEM154	transmembrane protein 154 [Source:HGNC Symbol;Acc:HGNC:26489]	-1.72665	-1.07195	-2.18974	0.0469027	0.863362	-3.83466
ENSG00000214182	PTMAP5	prothymosin, alpha pseudogene 5 [Source:HGNC Symbol;Acc:HGNC:9628]	-0.449398	3.37646	-2.18958	0.0469171	0.863362	-3.88301
ENSG00000150093	ITGB1	integrin subunit beta 1 [Source:HGNC Symbol;Acc:HGNC:6153]	-0.844568	5.03951	-2.18922	0.0469479	0.863362	-4.03491
ENSG00000121957	GPSM2	G-protein signaling modulator 2 [Source:HGNC Symbol;Acc:HGNC:29501]	0.249794	7.62232	2.18705	0.0471364	0.863362	-4.07758
ENSG00000166925	TSC22D4	TSC22 domain family member 4 [Source:HGNC Symbol;Acc:HGNC:21696]	0.320577	5.77763	2.18699	0.0471413	0.863362	-4.07801
ENSG00000171219	CDC42BPG	CDC42 binding protein kinase gamma [Source:HGNC Symbol;Acc:HGNC:29829]	0.901233	0.0201541	2.18638	0.0471947	0.863362	-3.7177
ENSG00000068028	RASSF1	Ras association domain family member 1 [Source:HGNC Symbol;Acc:HGNC:9882]	-0.601293	5.24768	-2.18545	0.0472759	0.863362	-4.05639
ENSG00000101407	TTI1	TELO2 interacting protein 1 [Source:HGNC Symbol;Acc:HGNC:29029]	-0.288091	5.04204	-2.18538	0.0472824	0.863362	-4.04892
ENSG00000198604	BAZ1A	bromodomain adjacent to zinc finger domain 1A [Source:HGNC Symbol;Acc:HGNC:960]	-0.425431	5.97447	-2.18502	0.0473138	0.863362	-4.08352
ENSG00000196177	ACADSB	acyl-CoA dehydrogenase, short/branched chain [Source:HGNC Symbol;Acc:HGNC:91]	0.220754	5.79657	2.1845	0.0473588	0.863362	-4.08255
ENSG00000173156	RHOD	ras homolog family member D [Source:HGNC Symbol;Acc:HGNC:670]	0.40748	3.41096	2.18163	0.0476106	0.863362	-3.91199
ENSG00000173621	LRFN4	leucine rich repeat and fibronectin type III domain containing 4 [Source:HGNC Symbol;Acc:HGNC:28456]	0.255919	4.82737	2.17981	0.0477708	0.863362	-4.04805
ENSG00000055208	TAB2	TGF-beta activated kinase 1/MAP3K7 binding protein 2 [Source:HGNC Symbol;Acc:HGNC:17075]	0.221009	4.84306	2.17905	0.047838	0.863362	-4.05023
ENSG00000182208	MOB2	MOB kinase activator 2 [Source:HGNC Symbol;Acc:HGNC:24904]	0.274355	3.41132	2.1785	0.0478864	0.863362	-3.9159
ENSG00000143815	LBR	lamin B receptor [Source:HGNC Symbol;Acc:HGNC:6518]	0.282617	6.62598	2.17844	0.0478916	0.863362	-4.09946
ENSG00000001461	NIPAL3	NIPA like domain containing 3 [Source:HGNC Symbol;Acc:HGNC:25233]	0.305749	3.36935	2.17832	0.0479018	0.863362	-3.91175
ENSG00000136828	RALGPS1	Ral GEF with PH domain and SH3 binding motif 1 [Source:HGNC Symbol;Acc:HGNC:16851]	0.371878	2.58248	2.1775	0.0479745	0.863362	-3.82555
ENSG00000197905	TEAD4	TEA domain transcription factor 4 [Source:HGNC Symbol;Acc:HGNC:11717]	-0.313968	4.7295	-2.17686	0.048031	0.863362	-4.0409
ENSG00000159917	ZNF235	zinc finger protein 235 [Source:HGNC Symbol;Acc:HGNC:12866]	-0.648979	0.944312	-2.17493	0.0482028	0.863362	-3.71474
ENSG00000130751	NPAS1	neuronal PAS domain protein 1 [Source:HGNC Symbol;Acc:HGNC:7894]	0.842186	0.457715	2.17443	0.0482475	0.863362	-3.71741
ENSG00000257815	NA	long intergenic non-protein coding RNA 1481 [Source:EntrezGene;Acc:101928062]	0.476819	2.10507	2.17199	0.0484649	0.863362	-3.78697
ENSG00000266916	ZNF793-AS1	ZNF793 antisense RNA 1 (head to head) [Source:HGNC Symbol;Acc:HGNC:51303]	0.372393	3.93979	2.17128	0.0485276	0.863362	-3.98564
ENSG00000054392	HHAT	hedgehog acyltransferase [Source:HGNC Symbol;Acc:HGNC:18270]	0.284676	5.82818	2.1711	0.0485444	0.863362	-4.10501
ENSG00000128059	PPAT	phosphoribosyl pyrophosphate amidotransferase [Source:HGNC Symbol;Acc:HGNC:9238]	-0.410933	3.95116	-2.17086	0.0485658	0.863362	-3.97896
ENSG00000010256	UQCRC1	ubiquinol-cytochrome c reductase core protein I [Source:HGNC Symbol;Acc:HGNC:12585]	0.22377	5.97783	2.17012	0.0486322	0.863362	-4.10926
ENSG00000215417	MIR17HG	miR-17-92a-1 cluster host gene [Source:HGNC Symbol;Acc:HGNC:23564]	-0.389838	2.80809	-2.16992	0.0486499	0.863362	-3.8513
ENSG00000165724	ZMYND19	zinc finger MYND-type containing 19 [Source:HGNC Symbol;Acc:HGNC:21146]	-0.229758	6.18138	-2.16794	0.0488276	0.863362	-4.11499
ENSG00000186409	CCDC30	coiled-coil domain containing 30 [Source:HGNC Symbol;Acc:HGNC:26103]	-0.779399	0.042815	-2.1676	0.0488586	0.863362	-3.74711
ENSG00000182973	CNOT10	CCR4-NOT transcription complex subunit 10 [Source:HGNC Symbol;Acc:HGNC:23817]	-0.317892	3.10049	-2.16731	0.0488839	0.863362	-3.88945
ENSG00000137309	HMGA1	high mobility group AT-hook 1 [Source:HGNC Symbol;Acc:HGNC:5010]	-0.310213	7.72155	-2.16663	0.0489453	0.863362	-4.11043
ENSG00000117016	RIMS3	regulating synaptic membrane exocytosis 3 [Source:HGNC Symbol;Acc:HGNC:21292]	0.323202	3.95775	2.16486	0.0491055	0.863362	-3.99745
ENSG00000145555	MYO10	myosin X [Source:HGNC Symbol;Acc:HGNC:7593]	-0.40212	6.21842	-2.16144	0.049416	0.863362	-4.12542
ENSG00000138061	CYP1B1	cytochrome P450 family 1 subfamily B member 1 [Source:HGNC Symbol;Acc:HGNC:2597]	-0.865722	0.690592	-2.1598	0.0495652	0.863362	-3.73465
ENSG00000148737	TCF7L2	transcription factor 7 like 2 [Source:HGNC Symbol;Acc:HGNC:11641]	-0.227996	4.58272	-2.15828	0.0497038	0.863362	-4.06052
ENSG00000179111	HES7	hes family bHLH transcription factor 7 [Source:HGNC Symbol;Acc:HGNC:15977]	0.497916	1.7323	2.15802	0.0497272	0.863362	-3.77628
ENSG00000173889	PHC3	polyhomeotic homolog 3 [Source:HGNC Symbol;Acc:HGNC:15682]	0.263926	5.71783	2.15746	0.0497785	0.863362	-4.12462
ENSG00000143420	ENSA	endosulfine alpha [Source:HGNC Symbol;Acc:HGNC:3360]	0.240927	8.63415	2.15709	0.0498124	0.863362	-4.11386
ENSG00000237436	NA	NA	0.49638	1.24451	2.1538	0.0501152	0.863362	-3.75345
ENSG00000204922	UQCC3	ubiquinol-cytochrome c reductase complex assembly factor 3 [Source:HGNC Symbol;Acc:HGNC:34399]	0.237271	6.15087	2.15116	0.050359	0.863362	-4.14212
ENSG00000178974	FBXO34	F-box protein 34 [Source:HGNC Symbol;Acc:HGNC:20201]	0.501982	2.0251	2.15009	0.0504586	0.863362	-3.81185
ENSG00000251022	THAP9-AS1	THAP9 antisense RNA 1 [Source:HGNC Symbol;Acc:HGNC:44172]	-0.323263	3.49869	-2.14972	0.0504925	0.863362	-3.96299
ENSG00000259943	NA	NA	0.344758	2.95965	2.14968	0.0504959	0.863362	-3.90924
ENSG00000086544	ITPKC	inositol-trisphosphate 3-kinase C [Source:HGNC Symbol;Acc:HGNC:14897]	0.323303	2.89884	2.14933	0.0505291	0.863362	-3.90277
ENSG00000065054	SLC9A3R2	SLC9A3 regulator 2 [Source:HGNC Symbol;Acc:HGNC:11076]	0.555281	2.10742	2.14755	0.0506946	0.863362	-3.82286
ENSG00000198959	TGM2	transglutaminase 2 [Source:HGNC Symbol;Acc:HGNC:11778]	-0.47642	5.81922	-2.14742	0.0507067	0.863362	-4.14081
ENSG00000109758	HGFAC	HGF activator [Source:HGNC Symbol;Acc:HGNC:4894]	0.750626	0.423437	2.14599	0.0508403	0.863362	-3.75262
ENSG00000182749	PAQR7	progestin and adipoQ receptor family member 7 [Source:HGNC Symbol;Acc:HGNC:23146]	-0.524157	4.87554	-2.14528	0.050906	0.863362	-4.09971
ENSG00000117399	CDC20	cell division cycle 20 [Source:HGNC Symbol;Acc:HGNC:1723]	0.266238	7.00394	2.14496	0.0509364	0.863362	-4.152
ENSG00000251580	NA	NA	0.464813	1.21849	2.14483	0.0509486	0.863362	-3.76421
ENSG00000182759	MAFA	MAF bZIP transcription factor A [Source:HGNC Symbol;Acc:HGNC:23145]	0.531475	3.11743	2.14453	0.0509765	0.863362	-3.93642
ENSG00000153317	ASAP1	ArfGAP with SH3 domain, ankyrin repeat and PH domain 1 [Source:HGNC Symbol;Acc:HGNC:2720]	-0.341501	4.79299	-2.1442	0.0510076	0.863362	-4.09821
ENSG00000175938	ORAI3	ORAI calcium release-activated calcium modulator 3 [Source:HGNC Symbol;Acc:HGNC:28185]	0.306435	6.49268	2.14383	0.0510421	0.863362	-4.1557
ENSG00000176720	BOK	BOK, BCL2 family apoptosis regulator [Source:HGNC Symbol;Acc:HGNC:1087]	-0.245024	4.56167	-2.14332	0.0510894	0.863362	-4.08262
ENSG00000143740	SNAP47	synaptosome associated protein 47 [Source:HGNC Symbol;Acc:HGNC:30669]	0.237913	4.46968	2.14257	0.05116	0.863362	-4.08076
ENSG00000226711	FAM66C	family with sequence similarity 66 member C [Source:HGNC Symbol;Acc:HGNC:21644]	0.456982	1.98499	2.14234	0.0511822	0.863362	-3.81913
ENSG00000115041	KCNIP3	potassium voltage-gated channel interacting protein 3 [Source:HGNC Symbol;Acc:HGNC:15523]	0.629892	2.26927	2.14161	0.0512509	0.863362	-3.84749
ENSG00000183426	NPIPA1	nuclear pore complex interacting protein family member A1 [Source:HGNC Symbol;Acc:HGNC:7909]	0.591291	0.701208	2.14129	0.0512809	0.863362	-3.7569
ENSG00000112640	PPP2R5D	protein phosphatase 2 regulatory subunit B'delta [Source:HGNC Symbol;Acc:HGNC:9312]	0.268295	7.72929	2.1407	0.0513362	0.863362	-4.15144
ENSG00000043039	BARX2	BARX homeobox 2 [Source:HGNC Symbol;Acc:HGNC:956]	0.308348	5.70206	2.13875	0.0515208	0.863362	-4.15445
ENSG00000213614	HEXA	hexosaminidase subunit alpha [Source:HGNC Symbol;Acc:HGNC:4878]	0.286557	5.62569	2.13819	0.0515736	0.863362	-4.15327
ENSG00000099821	POLRMT	RNA polymerase mitochondrial [Source:HGNC Symbol;Acc:HGNC:9200]	-0.290657	3.37006	-2.13803	0.0515881	0.863362	-3.96606
ENSG00000168228	ZCCHC4	zinc finger CCHC-type containing 4 [Source:HGNC Symbol;Acc:HGNC:22917]	0.493613	1.19332	2.1367	0.0517149	0.863362	-3.77408
ENSG00000105991	HOXA1	homeobox A1 [Source:HGNC Symbol;Acc:HGNC:5099]	-0.678365	-0.118764	-2.13657	0.0517273	0.863362	-3.78883
ENSG00000142871	CYR61	cysteine rich angiogenic inducer 61 [Source:HGNC Symbol;Acc:HGNC:2654]	-0.566785	6.80514	-2.13317	0.0520506	0.863362	-4.17237
ENSG00000166016	ABTB2	ankyrin repeat and BTB domain containing 2 [Source:HGNC Symbol;Acc:HGNC:23842]	0.353867	4.24081	2.13068	0.0522891	0.863362	-4.07993
ENSG00000167291	TBC1D16	TBC1 domain family member 16 [Source:HGNC Symbol;Acc:HGNC:28356]	-0.294476	6.24185	-2.13039	0.0523171	0.863362	-4.17614
ENSG00000090447	TFAP4	transcription factor AP-4 [Source:HGNC Symbol;Acc:HGNC:11745]	-0.330486	4.49985	-2.13003	0.0523512	0.863362	-4.09714
ENSG00000214193	SH3D21	SH3 domain containing 21 [Source:HGNC Symbol;Acc:HGNC:26236]	-0.367593	2.81181	-2.13001	0.0523537	0.863362	-3.91288
ENSG00000198924	DCLRE1A	DNA cross-link repair 1A [Source:HGNC Symbol;Acc:HGNC:17660]	0.585391	1.34287	2.12912	0.0524383	0.863362	-3.79176
ENSG00000272843	NA	NA	0.397393	2.47373	2.12886	0.0524635	0.863362	-3.88692
ENSG00000164631	ZNF12	zinc finger protein 12 [Source:HGNC Symbol;Acc:HGNC:12902]	-0.269864	4.85154	-2.12854	0.0524942	0.863362	-4.12824
ENSG00000094841	UPRT	uracil phosphoribosyltransferase homolog [Source:HGNC Symbol;Acc:HGNC:28334]	0.420521	3.53044	2.12821	0.0525265	0.863362	-4.00911
ENSG00000197951	ZNF71	zinc finger protein 71 [Source:HGNC Symbol;Acc:HGNC:13141]	0.281601	3.4622	2.12771	0.052575	0.863362	-4.00114
ENSG00000130222	GADD45G	growth arrest and DNA damage inducible gamma [Source:HGNC Symbol;Acc:HGNC:4097]	0.694298	3.60716	2.127	0.0526435	0.863362	-4.01994
ENSG00000080573	COL5A3	collagen type V alpha 3 chain [Source:HGNC Symbol;Acc:HGNC:14864]	0.540996	3.09276	2.12607	0.0527325	0.863362	-3.96188
ENSG00000172830	SSH3	slingshot protein phosphatase 3 [Source:HGNC Symbol;Acc:HGNC:30581]	0.405222	3.34788	2.12533	0.0528043	0.863362	-3.9924
ENSG00000251595	ABCA11P	ATP binding cassette subfamily A member 11, pseudogene [Source:HGNC Symbol;Acc:HGNC:31]	0.618281	0.590773	2.12448	0.0528871	0.863362	-3.77759
ENSG00000164402	SEPT8	septin 8 [Source:HGNC Symbol;Acc:HGNC:16511]	0.304397	5.82776	2.12279	0.0530508	0.863362	-4.18306
ENSG00000101413	RPRD1B	regulation of nuclear pre-mRNA domain containing 1B [Source:HGNC Symbol;Acc:HGNC:16209]	0.38398	4.92204	2.12149	0.0531775	0.863362	-4.14808
ENSG00000143753	DEGS1	delta 4-desaturase, sphingolipid 1 [Source:HGNC Symbol;Acc:HGNC:13709]	0.308014	4.33364	2.12142	0.0531841	0.863362	-4.103
ENSG00000182359	KBTBD3	kelch repeat and BTB domain containing 3 [Source:HGNC Symbol;Acc:HGNC:22934]	0.523279	1.24833	2.12121	0.0532045	0.863362	-3.79742
ENSG00000279407	NA	NA	-0.726994	0.252268	-2.11966	0.0533557	0.863362	-3.79142
ENSG00000131653	TRAF7	TNF receptor associated factor 7 [Source:HGNC Symbol;Acc:HGNC:20456]	0.243595	5.73597	2.11898	0.0534221	0.863362	-4.18714
ENSG00000249992	TMEM158	transmembrane protein 158 (gene/pseudogene) [Source:HGNC Symbol;Acc:HGNC:30293]	-0.68682	7.20982	-2.11893	0.053427	0.863362	-4.19283
ENSG00000100410	PHF5A	PHD finger protein 5A [Source:HGNC Symbol;Acc:HGNC:18000]	-0.346107	5.07712	-2.11755	0.0535626	0.863362	-4.15969
ENSG00000125246	CLYBL	citrate lyase beta like [Source:HGNC Symbol;Acc:HGNC:18355]	0.378095	2.59349	2.11739	0.0535782	0.863362	-3.91665
ENSG00000161835	GRASP	general receptor for phosphoinositides 1 associated scaffold protein [Source:HGNC Symbol;Acc:HGNC:18707]	-0.678301	0.898095	-2.11704	0.0536124	0.863362	-3.78766
ENSG00000268375	NA	NA	-0.798269	1.78759	-2.11675	0.053641	0.863362	-3.82539
ENSG00000150593	PDCD4	programmed cell death 4 (neoplastic transformation inhibitor) [Source:HGNC Symbol;Acc:HGNC:8763]	0.221821	5.97858	2.11635	0.0536803	0.863362	-4.19615
ENSG00000228253	MT-ATP8	mitochondrially encoded ATP synthase 8 [Source:HGNC Symbol;Acc:HGNC:7415]	-0.857812	7.05962	-2.11527	0.0537866	0.863362	-4.19957
ENSG00000100393	EP300	E1A binding protein p300 [Source:HGNC Symbol;Acc:HGNC:3373]	-0.28246	5.07863	-2.11494	0.0538192	0.863362	-4.16471
ENSG00000000460	C1orf112	chromosome 1 open reading frame 112 [Source:HGNC Symbol;Acc:HGNC:25565]	0.259785	3.78491	2.11485	0.0538282	0.863362	-4.0575
ENSG00000135916	ITM2C	integral membrane protein 2C [Source:HGNC Symbol;Acc:HGNC:6175]	0.364774	3.87984	2.1146	0.0538521	0.863362	-4.06891
ENSG00000141753	IGFBP4	insulin like growth factor binding protein 4 [Source:HGNC Symbol;Acc:HGNC:5473]	-0.406965	3.03383	-2.1138	0.0539316	0.863362	-3.961
ENSG00000099999	RNF215	ring finger protein 215 [Source:HGNC Symbol;Acc:HGNC:33434]	-0.487535	2.36895	-2.11226	0.0540833	0.863362	-3.88959
ENSG00000144746	ARL6IP5	ADP ribosylation factor like GTPase 6 interacting protein 5 [Source:HGNC Symbol;Acc:HGNC:16937]	0.254786	4.81916	2.11208	0.0541008	0.863362	-4.15617
ENSG00000187951	ARHGAP11B	Rho GTPase activating protein 11B [Source:HGNC Symbol;Acc:HGNC:15782]	-0.317621	3.25135	-2.11151	0.0541579	0.863362	-3.9925
ENSG00000151929	BAG3	BCL2 associated athanogene 3 [Source:HGNC Symbol;Acc:HGNC:939]	0.285825	6.05625	2.11137	0.0541712	0.863362	-4.20514
ENSG00000131187	F12	coagulation factor XII [Source:HGNC Symbol;Acc:HGNC:3530]	-0.351829	3.1692	-2.11085	0.0542234	0.863362	-3.98256
ENSG00000172915	NBEA	neurobeachin [Source:HGNC Symbol;Acc:HGNC:7648]	-0.308385	3.83683	-2.11069	0.0542394	0.863362	-4.06305
ENSG00000215717	TMEM167B	transmembrane protein 167B [Source:HGNC Symbol;Acc:HGNC:30187]	0.257261	4.72406	2.10942	0.0543647	0.863362	-4.15359
ENSG00000088451	TGDS	TDP-glucose 4,6-dehydratase [Source:HGNC Symbol;Acc:HGNC:20324]	0.701296	1.15574	2.10923	0.0543838	0.863362	-3.80946
ENSG00000171298	GAA	glucosidase alpha, acid [Source:HGNC Symbol;Acc:HGNC:4065]	0.321491	6.58913	2.10891	0.054416	0.863362	-4.21188
ENSG00000096092	TMEM14A	transmembrane protein 14A [Source:HGNC Symbol;Acc:HGNC:21076]	0.289689	5.70575	2.10831	0.054476	0.863362	-4.20349
ENSG00000136754	ABI1	abl interactor 1 [Source:HGNC Symbol;Acc:HGNC:11320]	0.253283	5.73657	2.10676	0.0546299	0.863362	-4.20674
ENSG00000205476	CCDC85C	coiled-coil domain containing 85C [Source:HGNC Symbol;Acc:HGNC:35459]	0.277706	5.07264	2.10654	0.054652	0.863362	-4.18076
ENSG00000163811	WDR43	WD repeat domain 43 [Source:HGNC Symbol;Acc:HGNC:28945]	-0.320995	6.57674	-2.10651	0.0546549	0.863362	-4.21589
ENSG00000262265	NA	NA	-0.46108	3.51795	-2.10644	0.0546622	0.863362	-4.02919
ENSG00000269044	NA	NA	0.472994	2.58321	2.10597	0.054709	0.863362	-3.93343
ENSG00000146666	LINC00525	long intergenic non-protein coding RNA 525 [Source:HGNC Symbol;Acc:HGNC:40290]	0.541695	2.25997	2.10586	0.0547199	0.863362	-3.89892
ENSG00000196526	AFAP1	actin filament associated protein 1 [Source:HGNC Symbol;Acc:HGNC:24017]	-0.291235	4.27646	-2.10489	0.0548174	0.863362	-4.11718
ENSG00000105829	BET1	Bet1 golgi vesicular membrane trafficking protein [Source:HGNC Symbol;Acc:HGNC:14562]	0.296578	3.68593	2.10459	0.0548469	0.863362	-4.06278
ENSG00000130158	DOCK6	dedicator of cytokinesis 6 [Source:HGNC Symbol;Acc:HGNC:19189]	-0.325491	6.48229	-2.10422	0.0548848	0.863362	-4.2194
ENSG00000273987	NA	NA	0.82715	0.739751	2.10283	0.0550245	0.863362	-3.80568
ENSG00000272953	NA	NA	0.453349	1.00427	2.10277	0.0550303	0.863362	-3.81164
ENSG00000167964	RAB26	RAB26, member RAS oncogene family [Source:HGNC Symbol;Acc:HGNC:14259]	0.696061	0.770247	2.10162	0.0551454	0.863362	-3.80761
ENSG00000159184	HOXB13	homeobox B13 [Source:HGNC Symbol;Acc:HGNC:5112]	0.341091	3.31656	2.10141	0.0551669	0.863362	-4.02512
ENSG00000235833	NA	NA	-0.492344	1.53848	-2.10046	0.0552628	0.863362	-3.83504
ENSG00000136875	PRPF4	pre-mRNA processing factor 4 [Source:HGNC Symbol;Acc:HGNC:17349]	-0.332331	5.10628	-2.0992	0.0553906	0.863362	-4.19069
ENSG00000258738	NA	NA	0.45048	1.14655	2.09902	0.0554086	0.863362	-3.82204
ENSG00000126603	GLIS2	GLIS family zinc finger 2 [Source:HGNC Symbol;Acc:HGNC:29450]	0.444816	4.10705	2.09794	0.0555182	0.863362	-4.11889
ENSG00000102753	KPNA3	karyopherin subunit alpha 3 [Source:HGNC Symbol;Acc:HGNC:6396]	-0.440825	3.81989	-2.09751	0.0555613	0.863362	-4.07938
ENSG00000143384	MCL1	BCL2 family apoptosis regulator [Source:HGNC Symbol;Acc:HGNC:6943]	-0.222398	8.34231	-2.09728	0.0555851	0.863362	-4.21421
ENSG00000115129	TP53I3	tumor protein p53 inducible protein 3 [Source:HGNC Symbol;Acc:HGNC:19373]	0.25013	6.1521	2.09721	0.0555916	0.863362	-4.22896
ENSG00000182873	PRKCZ-AS1	NA	0.521417	1.03357	2.0965	0.0556643	0.863362	-3.82088
ENSG00000130529	TRPM4	transient receptor potential cation channel subfamily M member 4 [Source:HGNC Symbol;Acc:HGNC:17993]	0.24947	4.11704	2.09484	0.0558325	0.863362	-4.12378
ENSG00000114735	HEMK1	HemK methyltransferase family member 1 [Source:HGNC Symbol;Acc:HGNC:24923]	-0.289506	4.08415	-2.09278	0.0560437	0.863362	-4.11745
ENSG00000179335	CLK3	CDC like kinase 3 [Source:HGNC Symbol;Acc:HGNC:2071]	0.282669	4.77866	2.09267	0.0560548	0.863362	-4.18425
ENSG00000004799	PDK4	pyruvate dehydrogenase kinase 4 [Source:HGNC Symbol;Acc:HGNC:8812]	0.464384	3.02693	2.09243	0.0560791	0.863362	-4.00534
ENSG00000158042	MRPL17	mitochondrial ribosomal protein L17 [Source:HGNC Symbol;Acc:HGNC:14053]	-0.212418	5.60463	-2.09222	0.0561005	0.863362	-4.22508
ENSG00000212664	NA	NA	0.368296	2.84264	2.0912	0.0562046	0.863362	-3.98469
ENSG00000061656	SPAG4	sperm associated antigen 4 [Source:HGNC Symbol;Acc:HGNC:11214]	-1.05001	0.428126	-2.09045	0.0562825	0.863362	-3.82283
ENSG00000167635	ZNF146	zinc finger protein 146 [Source:HGNC Symbol;Acc:HGNC:12931]	0.434222	6.28667	2.08873	0.0564592	0.863362	-4.2433
ENSG00000159915	ZNF233	zinc finger protein 233 [Source:HGNC Symbol;Acc:HGNC:30946]	0.725911	-0.146466	2.08816	0.0565182	0.863362	-3.8357
ENSG00000156968	MPV17L	MPV17 mitochondrial inner membrane protein like [Source:HGNC Symbol;Acc:HGNC:26827]	-0.219745	5.22029	-2.08809	0.0565252	0.863362	-4.21571
ENSG00000167766	ZNF83	zinc finger protein 83 [Source:HGNC Symbol;Acc:HGNC:13158]	-0.239367	4.96346	-2.08802	0.0565324	0.863362	-4.20072
ENSG00000272102	NA	NA	0.46505	1.24819	2.08713	0.0566238	0.863362	-3.84268
ENSG00000164362	TERT	telomerase reverse transcriptase [Source:HGNC Symbol;Acc:HGNC:11730]	-0.944531	0.734084	-2.08642	0.0566973	0.863362	-3.82418
ENSG00000131943	C19orf12	chromosome 19 open reading frame 12 [Source:HGNC Symbol;Acc:HGNC:25443]	-0.22721	5.03492	-2.08586	0.0567548	0.863362	-4.20872
ENSG00000256087	ZNF432	zinc finger protein 432 [Source:HGNC Symbol;Acc:HGNC:20810]	-0.298516	3.59581	-2.08552	0.0567901	0.863362	-4.07438
ENSG00000067606	PRKCZ	protein kinase C zeta [Source:HGNC Symbol;Acc:HGNC:9412]	0.338297	6.08576	2.08269	0.057084	0.863362	-4.25129
ENSG00000136603	SKIL	SKI-like proto-oncogene [Source:HGNC Symbol;Acc:HGNC:10897]	-0.28214	3.20632	-2.08244	0.0571106	0.863362	-4.03246
ENSG00000112996	MRPS30	mitochondrial ribosomal protein S30 [Source:HGNC Symbol;Acc:HGNC:8769]	-0.19991	6.03906	-2.08072	0.0572894	0.863362	-4.25367
ENSG00000174173	TRMT10C	tRNA methyltransferase 10C, mitochondrial RNase P subunit [Source:HGNC Symbol;Acc:HGNC:26022]	-0.242284	4.89424	-2.08057	0.0573055	0.863362	-4.20783
ENSG00000166025	AMOTL1	angiomotin like 1 [Source:HGNC Symbol;Acc:HGNC:17811]	-0.27314	3.74468	-2.0804	0.0573224	0.863362	-4.10014
ENSG00000120798	NR2C1	nuclear receptor subfamily 2 group C member 1 [Source:HGNC Symbol;Acc:HGNC:7971]	0.255142	3.36329	2.0802	0.057344	0.863362	-4.06242
ENSG00000197930	ERO1A	endoplasmic reticulum oxidoreductase 1 alpha [Source:HGNC Symbol;Acc:HGNC:13280]	-0.31808	5.72813	-2.07945	0.0574225	0.863362	-4.24848
ENSG00000142864	SERBP1	SERPINE1 mRNA binding protein 1 [Source:HGNC Symbol;Acc:HGNC:17860]	-0.234547	8.15878	-2.07839	0.0575337	0.863362	-4.24663
ENSG00000124145	SDC4	syndecan 4 [Source:HGNC Symbol;Acc:HGNC:10661]	-0.235995	7.98336	-2.07807	0.0575664	0.863362	-4.24938
ENSG00000148840	PPRC1	peroxisome proliferator-activated receptor gamma, coactivator-related 1 [Source:HGNC Symbol;Acc:HGNC:30025]	-0.247044	5.27193	-2.07801	0.0575731	0.863362	-4.23409
ENSG00000187535	IFT140	intraflagellar transport 140 [Source:HGNC Symbol;Acc:HGNC:29077]	0.425828	1.14731	2.07784	0.0575912	0.863362	-3.84979
ENSG00000171346	KRT15	keratin 15 [Source:HGNC Symbol;Acc:HGNC:6421]	0.327846	10.011	2.0767	0.0577108	0.863362	-4.22272
ENSG00000111653	ING4	inhibitor of growth family member 4 [Source:HGNC Symbol;Acc:HGNC:19423]	0.22099	5.23211	2.07667	0.0577136	0.863362	-4.23657
ENSG00000145623	OSMR	oncostatin M receptor [Source:HGNC Symbol;Acc:HGNC:8507]	-0.324331	4.60927	-2.07537	0.057851	0.863362	-4.19332
ENSG00000143158	MPC2	mitochondrial pyruvate carrier 2 [Source:HGNC Symbol;Acc:HGNC:24515]	0.228193	5.60542	2.07504	0.0578858	0.863362	-4.25376
ENSG00000182957	SPATA13	spermatogenesis associated 13 [Source:HGNC Symbol;Acc:HGNC:23222]	-0.614198	2.19916	-2.07377	0.0580191	0.863362	-3.92586
ENSG00000099364	FBXL19	F-box and leucine rich repeat protein 19 [Source:HGNC Symbol;Acc:HGNC:25300]	-0.402364	3.26101	-2.07345	0.0580528	0.863362	-4.05088
ENSG00000252498	RNU6-1016P	RNA, U6 small nuclear 1016, pseudogene [Source:HGNC Symbol;Acc:HGNC:47979]	-1.02746	0.924087	-2.07332	0.058067	0.863362	-3.84207
ENSG00000138821	SLC39A8	solute carrier family 39 member 8 [Source:HGNC Symbol;Acc:HGNC:20862]	0.485611	2.03186	2.07084	0.0583293	0.863362	-3.926
ENSG00000136908	DPM2	dolichyl-phosphate mannosyltransferase subunit 2, regulatory [Source:HGNC Symbol;Acc:HGNC:3006]	0.373194	3.80531	2.07084	0.0583295	0.863362	-4.12865
ENSG00000267475	NA	NA	0.516774	1.04971	2.07059	0.0583559	0.863362	-3.85524
ENSG00000054611	TBC1D22A	TBC1 domain family member 22A [Source:HGNC Symbol;Acc:HGNC:1309]	0.255474	5.0452	2.07037	0.0583794	0.863362	-4.23662
ENSG00000124813	RUNX2	runt related transcription factor 2 [Source:HGNC Symbol;Acc:HGNC:10472]	-0.455815	2.93685	-2.06999	0.0584193	0.863362	-4.01505
ENSG00000164941	INTS8	integrator complex subunit 8 [Source:HGNC Symbol;Acc:HGNC:26048]	0.259386	4.12385	2.0698	0.0584397	0.863362	-4.16385
ENSG00000259768	NA	NA	-0.380993	3.16013	-2.06955	0.0584665	0.863362	-4.04352
ENSG00000095564	BTAF1	B-TFIID TATA-box binding protein associated factor 1 [Source:HGNC Symbol;Acc:HGNC:17307]	-0.339026	3.68536	-2.06799	0.0586331	0.863362	-4.11176
ENSG00000273820	USP27X	ubiquitin specific peptidase 27, X-linked [Source:HGNC Symbol;Acc:HGNC:13486]	-0.320844	3.86649	-2.06798	0.058634	0.863362	-4.1326
ENSG00000273870	NA	NA	0.718849	0.455587	2.0677	0.0586636	0.863362	-3.84671
ENSG00000048162	NOP16	NOP16 nucleolar protein [Source:HGNC Symbol;Acc:HGNC:26934]	-0.210234	6.27869	-2.067	0.0587384	0.863362	-4.27809
ENSG00000282100	HSP90AB4P	heat shock protein 90 alpha family class B member 4, pseudogene [Source:HGNC Symbol;Acc:HGNC:32538]	-0.897197	2.34604	-2.06654	0.0587876	0.863362	-3.94608
ENSG00000270091	NA	NA	0.815794	0.905037	2.0664	0.0588031	0.863362	-3.85571
ENSG00000274104	NA	NA	1.11868	-0.509469	2.06597	0.0588488	0.863362	-3.87615
ENSG00000181240	SLC25A41	solute carrier family 25 member 41 [Source:HGNC Symbol;Acc:HGNC:28533]	0.295852	4.02831	2.06554	0.0588946	0.863362	-4.16089
ENSG00000051180	RAD51	RAD51 recombinase [Source:HGNC Symbol;Acc:HGNC:9817]	-0.232768	4.97389	-2.06538	0.0589118	0.863362	-4.23719
ENSG00000110031	LPXN	leupaxin [Source:HGNC Symbol;Acc:HGNC:14061]	-0.696802	1.93207	-2.06416	0.0590427	0.863362	-3.91324
ENSG00000089723	OTUB2	OTU deubiquitinase, ubiquitin aldehyde binding 2 [Source:HGNC Symbol;Acc:HGNC:20351]	-0.365017	2.16913	-2.0638	0.0590815	0.863362	-3.94075
[truncated: 12,574 more rows]

## Sheet: BI-3406_50mgkg_24h
ensg	symbol	name	logFC	AveExpr	t	P.Value	adj.P.Val	B
[truncated: 14,107 more rows]
