# Supplementary material for: BI-3406, a Potent and Selective SOS1–KRAS Interaction Inhibitor, Is Effective in KRAS-Driven Cancers through Combined MEK Inhibition
Source: Oxford University Press journal article supplement (doi:10.1158/2159-8290.cd-20-0142), 2020-08-19
Supplement: cd-20-0142r1_supplementary_table_s9.xlsx [file cd-20-0142r1_supplementary_table_s9.xlsx]

## Sheet: STR Cell Lines
Cell line	Vendor / Source	Date of acquisition	Date of STR authentication	Comment
A-375	ATCC CRL-1619 LOT 61573377	21.02.2014	21.05.2014
A-427	ATCC HTB-53 LOT 70001138	05.12.2017	19.03.2018
A549	ATCC CCL-185 LOT 70007520	12.06.2018	18.10.2018	ZM3 renewed !
ABC-1	JCRB JCRB0815	12.07.2013	16.09.2013
Calu-6	DSMZ ACC 734 LOT1	20.04.2016	08.08.2016
COLO 205	ATCC CCL-222 LOT 61586374	28.10.2015	02.02.2016
DLD-1	ATCC CCL-221 LOT 1658005	13.12.2002	13.07.2017
GEO	Stefano Pepe, Uiversita degli Studi di Napoli (original M. Brattain (Roswell Park Cancer Institute, Buffalo))	15.03.2008	12.12.2013
HCC-1438	KCLB 71438	08.01.2015	20.02.2015
HCC-827	ATCC CRL-2968 LOT 61449076	07.03.2014	31.10.2014
HEC-151	JCRB1122 LOT 8242010	22.07.2013	12.08.2013
Hs 578T	ATCC HTB-126 LOT 60106928	20.06.2013	12.08.2013
HT-29	ATCC HTB-38 LOT 59561256	24.01.2012	28.02.2013
LS411N	ATCC CRL-2159 LOT 59948969	04.12.2013	29.07.2014
MEL-JUSO	DSMZ ACC 74 LOT 7	17.01.2014	08.01.2015
MIA PaCa-2	ATCC CRL-1420 LOT 1350798	06.06.2001	22.08.2014
NCI-H1299	ATCC CRL-5803 LOT 60286835	27.09.2013	26.11.2013
NCI-H1373	ATCC CRL-5866 LOT 58078716	28.04.2017	10.02.2018
NCI-H1435	ATCC CRL-5870 LOT 58323742	22.05.2013	23.09.2013
NCI-H1650	ATCC CRL-5883 LOT 59060877	09.01.2013	20.03.2013
NCI-H1792	ATCC CRL-5895 LOT 7379249	23.08.2010	08.07.2015
NCI-H1975	ATCC CRL-5908 LOT 4431005	01.10.2007	14.05.2014
NCI-H1993	ATCC CRL-5909 LOT 5006448	13.06.2007	21.08.2017
NCI-H2122	ATCC CRL-5985	07.05.2013	23.05.2013
NCI-H2170	ATCC CRL-5928	25.11.2008	17.02.2016
NCI-H23	ATCC CRL-5800 LOT 61110775	26.03.2014	10.02.2018
NCI-H2347	ATCC CRL-5942 LOT 63052509	15.01.2016	17.06.2016
NCI-H292	ATCC CRL-1848	16.04.2012	25.04.2013
NCI-H358	ATCC CRL-5807 LOT 62278086	07.02.2018	23.05.2018
NCI-H460	ATCC HTB-177 LOT 59378191	10.07.2013	22.08.2014
NCI-H520	ATCC HTB-182 LOT 60322588	17.06.2014	13.07.2017
NCI-H522	ATCC CRL-5810 LOT 59427467	14.05.2013	04.07.2013
NCI-H82	ATCC HTB-175 LOT 57962440	27.09.2013	26.11.2013
OUMS-23	JCRB JCRB1022	01.03.2011	24.08.2011
PA-1	ATCC CRL-1572 LOT 3715434	12.05.2009	26.11.2014
PC-9	ECACC 90071810 LOT 14A030	27.10.2015	10.07.2018	formerly known as PC-14
SW1417	ATCC CCL-238 LOT 60153135	25.06.2014	15.12.2014
SW48	ATCC CCL-231 LOT 61074621	21.08.2014	13.05.2015
SW620	ECACC 87051203 LOT 10G022	03.04.2013	12.08.2013
SW837	ATCC CCL-235 LOT 61723910	12.08.2014	29.10.2014
